# Supplementary material for: Netrin G1 Promotes Pancreatic Tumorigenesis through Cancer-Associated Fibroblast–Driven Nutritional Support and Immunosuppression
Source: Oxford University Press journal article supplement (doi:10.1158/2159-8290.cd-20-0775), 2020-10-30
Supplement: 21598290cd200775-sup-244433_2_supp_6663100_qbbntb.xlsx [file 21598290cd200775-sup-244433_2_supp_6663100_qbbntb.xlsx]

## Sheet: Complete Gene List Microarray
ProbeName	accessions	chr_coord	ControlType	GeneName	SystematicName	Description	GeneSymbol	Entrez	PancreasTumor(CAF).vs.PancreasAdjacent(PSC) - LogFC	LinearRatio	PancreasTumor(CAF).vs.PancreasAdjacent(PSC).pvalue	PancreasTumor(CAF).vs.PancreasAdjacent(PSC).fdr	Up/Down	AvgExp.PancreasAdjacent(PSC)	AvgExp.PancreasTumor(CAF)	Adjacent(PSC)1	Adjacent(PSC)2	Tumor(CAF)1	Tumor(CAF)2	NoLowFilter
A_24_P151121	gb|AK056201	hs|chr19:58857206-58857147	0	A1BG	AK056201	gb|Homo sapiens cDNA FLJ31639 fis, clone NT2RI2003655, weakly similar to ZINC FINGER PROTEIN 195. [AK056201]	A1BG	1	-0.253995	0.838571	0.584615	0.987258	0	107.018	89.7419	76.4232	149.86	92.187	87.3617	1
A_33_P3685216	ref|NM_130786|ens|ENST00000263100|ens|ENST00000453054|gb|BC035719	hs|chr19:58858293-58858234	0	A1BG	NM_130786	ref|Homo sapiens alpha-1-B glycoprotein (A1BG), mRNA [NM_130786]	A1BG	1	-0.407074	0.754151	0.708724	0.987258	0	8286.31	6249.13	3425.12	20046.9	7985.18	4890.52	1
A_24_P721699	ref|NR_015380|gb|AK027222|gb|BC006144|gb|BC040926	hs|chr19:58866199-58866258	0	A1BG-AS1	NR_015380	ref|Homo sapiens A1BG antisense RNA 1 (non-protein coding) (A1BG-AS1), non-coding RNA [NR_015380]	A1BG-AS1	503538	-0.180746	0.882247	0.755778	0.9898	0	1305.75	1152	833.962	2044.44	1046.18	1268.51	1
A_23_P104224	ref|NM_138933|ref|NM_001198819|ref|NM_001198820|ref|NM_001198818	hs|chr10:52570857-52569801	0	A1CF	NM_138933	ref|Homo sapiens APOBEC1 complementation factor (A1CF), transcript variant 3, mRNA [NM_138933]	A1CF	29974	0.270019	1.20582	0.310071	0.987258	0	42.9034	51.7339	45.3152	40.62	52.4313	51.0458	0
A_23_P104224	ref|NM_138933|ref|NM_001198819|ref|NM_001198820|ref|NM_001198818	hs|chr10:52570857-52569801	0	A1CF	NM_138933	ref|Homo sapiens APOBEC1 complementation factor (A1CF), transcript variant 3, mRNA [NM_138933]	A1CF	29974	0.126742	1.09183	0.661364	0.987258	0	41.464	45.2715	47.4957	36.1984	44.0264	46.5518	0
A_23_P104224	ref|NM_138933|ref|NM_001198819|ref|NM_001198820|ref|NM_001198818	hs|chr10:52570857-52569801	0	A1CF	NM_138933	ref|Homo sapiens APOBEC1 complementation factor (A1CF), transcript variant 3, mRNA [NM_138933]	A1CF	29974	0.0834528	1.05955	0.757153	0.9898	0	51.3673	54.4263	47.0082	56.1306	58.0416	51.0361	0
A_23_P104224	ref|NM_138933|ref|NM_001198819|ref|NM_001198820|ref|NM_001198818	hs|chr10:52570857-52569801	0	A1CF	NM_138933	ref|Homo sapiens APOBEC1 complementation factor (A1CF), transcript variant 3, mRNA [NM_138933]	A1CF	29974	0.0782719	1.05575	0.743368	0.9898	0	53.1719	56.1364	52.7711	53.5757	56.7697	55.5102	0
A_23_P104224	ref|NM_138933|ref|NM_001198819|ref|NM_001198820|ref|NM_001198818	hs|chr10:52570857-52569801	0	A1CF	NM_138933	ref|Homo sapiens APOBEC1 complementation factor (A1CF), transcript variant 3, mRNA [NM_138933]	A1CF	29974	-0.0020977	0.998547	0.993761	0.999959	0	52.9935	52.9165	49.8317	56.3559	57.9836	48.2922	0
A_23_P104224	ref|NM_138933|ref|NM_001198819|ref|NM_001198820|ref|NM_001198818	hs|chr10:52570857-52569801	0	A1CF	NM_138933	ref|Homo sapiens APOBEC1 complementation factor (A1CF), transcript variant 3, mRNA [NM_138933]	A1CF	29974	-0.00436897	0.996976	0.986399	0.999423	0	46.3948	46.2546	50.5184	42.6079	45.7502	46.7645	0
A_23_P104224	ref|NM_138933|ref|NM_001198819|ref|NM_001198820|ref|NM_001198818	hs|chr10:52570857-52569801	0	A1CF	NM_138933	ref|Homo sapiens APOBEC1 complementation factor (A1CF), transcript variant 3, mRNA [NM_138933]	A1CF	29974	-0.0198045	0.986366	0.934715	0.99697	0	53.6156	52.8847	53.3081	53.9249	55.1785	50.6862	0
A_23_P104224	ref|NM_138933|ref|NM_001198819|ref|NM_001198820|ref|NM_001198818	hs|chr10:52570857-52569801	0	A1CF	NM_138933	ref|Homo sapiens APOBEC1 complementation factor (A1CF), transcript variant 3, mRNA [NM_138933]	A1CF	29974	-0.0494909	0.966277	0.838984	0.992672	0	49.3132	47.6502	49.3774	49.249	49.968	45.4399	0
A_23_P104224	ref|NM_138933|ref|NM_001198819|ref|NM_001198820|ref|NM_001198818	hs|chr10:52570857-52569801	0	A1CF	NM_138933	ref|Homo sapiens APOBEC1 complementation factor (A1CF), transcript variant 3, mRNA [NM_138933]	A1CF	29974	-0.089765	0.939676	0.732949	0.989759	0	52.7928	49.6081	53.6852	51.9152	54.4986	45.1565	0
A_23_P104224	ref|NM_138933|ref|NM_001198819|ref|NM_001198820|ref|NM_001198818	hs|chr10:52570857-52569801	0	A1CF	NM_138933	ref|Homo sapiens APOBEC1 complementation factor (A1CF), transcript variant 3, mRNA [NM_138933]	A1CF	29974	-0.143367	0.905404	0.64923	0.987258	0	56.672	51.3111	48.4902	66.2344	55.5415	47.4029	0
A_32_P110872	ref|NM_033110|ref|NM_001195087|ens|ENST00000455100|ens|ENST00000376250	hs|chr13:101183916-101183857	0	A2LD1	NM_033110	ref|Homo sapiens AIG2-like domain 1 (A2LD1), transcript variant 1, mRNA [NM_033110]	A2LD1	87769	-0.0407424	0.972155	0.971915	0.99841	0	356.732	346.799	140.523	905.604	250.003	481.073	1
A_23_P116898	ref|NM_000014|ens|ENST00000318602|ens|ENST00000495709|ens|ENST00000495442	hs|chr12:9221418-9221359	0	A2M	NM_000014	ref|Homo sapiens alpha-2-macroglobulin (A2M), mRNA [NM_000014]	A2M	2	1.2011	2.29915	0.610852	0.987258	0	392.982	903.526	80.7341	1912.88	263.285	3100.66	1
A_23_P116898	ref|NM_000014|ens|ENST00000318602|ens|ENST00000495709|ens|ENST00000495442	hs|chr12:9221418-9221359	0	A2M	NM_000014	ref|Homo sapiens alpha-2-macroglobulin (A2M), mRNA [NM_000014]	A2M	2	1.16504	2.2424	0.612247	0.987258	0	436.725	979.311	92.5257	2061.36	298.984	3207.69	1
A_23_P116898	ref|NM_000014|ens|ENST00000318602|ens|ENST00000495709|ens|ENST00000495442	hs|chr12:9221418-9221359	0	A2M	NM_000014	ref|Homo sapiens alpha-2-macroglobulin (A2M), mRNA [NM_000014]	A2M	2	1.14464	2.21091	0.615321	0.987258	0	448.861	992.392	97.1858	2073.1	302.879	3251.6	1
A_23_P116898	ref|NM_000014|ens|ENST00000318602|ens|ENST00000495709|ens|ENST00000495442	hs|chr12:9221418-9221359	0	A2M	NM_000014	ref|Homo sapiens alpha-2-macroglobulin (A2M), mRNA [NM_000014]	A2M	2	1.10524	2.15134	0.624218	0.987258	0	453.291	975.185	99.5092	2064.86	300.523	3164.44	1
A_23_P116898	ref|NM_000014|ens|ENST00000318602|ens|ENST00000495709|ens|ENST00000495442	hs|chr12:9221418-9221359	0	A2M	NM_000014	ref|Homo sapiens alpha-2-macroglobulin (A2M), mRNA [NM_000014]	A2M	2	1.07826	2.11149	0.63439	0.987258	0	452.188	954.789	100.963	2025.24	282.631	3225.48	1
A_23_P116898	ref|NM_000014|ens|ENST00000318602|ens|ENST00000495709|ens|ENST00000495442	hs|chr12:9221418-9221359	0	A2M	NM_000014	ref|Homo sapiens alpha-2-macroglobulin (A2M), mRNA [NM_000014]	A2M	2	1.07734	2.11014	0.639514	0.987258	0	455.277	960.699	97.8795	2117.68	284.48	3244.31	1
A_23_P116898	ref|NM_000014|ens|ENST00000318602|ens|ENST00000495709|ens|ENST00000495442	hs|chr12:9221418-9221359	0	A2M	NM_000014	ref|Homo sapiens alpha-2-macroglobulin (A2M), mRNA [NM_000014]	A2M	2	1.06404	2.09078	0.646834	0.987258	0	445.331	931.089	93.9141	2111.72	273.268	3172.44	1
A_23_P116898	ref|NM_000014|ens|ENST00000318602|ens|ENST00000495709|ens|ENST00000495442	hs|chr12:9221418-9221359	0	A2M	NM_000014	ref|Homo sapiens alpha-2-macroglobulin (A2M), mRNA [NM_000014]	A2M	2	1.0638	2.09044	0.64487	0.987258	0	445.976	932.284	94.1109	2113.4	279.095	3114.19	1
A_23_P116898	ref|NM_000014|ens|ENST00000318602|ens|ENST00000495709|ens|ENST00000495442	hs|chr12:9221418-9221359	0	A2M	NM_000014	ref|Homo sapiens alpha-2-macroglobulin (A2M), mRNA [NM_000014]	A2M	2	1.06359	2.09012	0.641533	0.987258	0	416.083	869.666	91.3814	1894.54	256.035	2953.96	1
A_23_P116898	ref|NM_000014|ens|ENST00000318602|ens|ENST00000495709|ens|ENST00000495442	hs|chr12:9221418-9221359	0	A2M	NM_000014	ref|Homo sapiens alpha-2-macroglobulin (A2M), mRNA [NM_000014]	A2M	2	0.817682	1.76257	0.737384	0.9898	0	547.489	964.989	98.9039	3030.66	286.992	3244.7	1
A_33_P3525263	ref|NM_144670|ens|ENST00000476130|ens|ENST00000299698|gb|AK122624	hs|chr12:9027061-9027120	0	A2ML1	NM_144670	ref|Homo sapiens alpha-2-macroglobulin-like 1 (A2ML1), mRNA [NM_144670]	A2ML1	144568	-0.0275371	0.981094	0.909652	0.996692	0	40.3252	39.5628	40.2059	40.4448	41.4243	37.7849	0
A_33_P3294002	ref|NM_017436|ens|ENST00000381278|ens|ENST00000401850|ens|ENST00000249005	hs|chr22:43088187-43088128	0	A4GALT	NM_017436	ref|Homo sapiens alpha 1,4-galactosyltransferase (A4GALT), mRNA [NM_017436]	A4GALT	53947	-0.398434	0.758681	0.408957	0.987258	0	5878.43	4459.85	4400.64	7852.47	5343.33	3722.45	1
A_23_P58046	ref|NM_016161|ens|ENST00000236709|gb|BC119640|gb|BC119639	hs|chr3:137843320-137843261	0	A4GNT	NM_016161	ref|Homo sapiens alpha-1,4-N-acetylglucosaminyltransferase (A4GNT), mRNA [NM_016161]	A4GNT	51146	0.0432462	1.03043	0.861984	0.994566	0	39.1018	40.2917	40.976	37.3134	38.4973	42.1697	0
A_33_P3232403	ref|NR_015356|ens|ENST00000442669|ens|ENST00000436945|gb|AY312364	hs|chr7:34758569-34758510	0	AAA1	NR_015356	ref|Homo sapiens asthma-associated alternatively spliced gene 1 (AAA1), transcript variant 3, non-coding RNA [NR_015356]	AAA1	404744	0.0673866	1.04782	0.809855	0.991367	0	37.02	38.7902	32.6681	41.9516	39.9699	37.6452	0
A_33_P3338172	ref|NR_033665|ref|NR_033664|ens|ENST00000358772|ens|ENST00000439852	hs|chr7:34797746-34797687	0	AAA1	NR_033665	ref|Homo sapiens asthma-associated alternatively spliced gene 1 (AAA1), transcript variant 2, non-coding RNA [NR_033665]	AAA1	404744	-0.0246309	0.983072	0.939679	0.99697	0	36.1514	35.5395	29.7564	43.9208	35.4568	35.6224	0
A_23_P64799	ref|NM_015665|ref|NM_001173466|ens|ENST00000209873|ens|ENST00000394384	hs|chr12:53701678-53701488	0	AAAS	NM_015665	ref|Homo sapiens achalasia, adrenocortical insufficiency, alacrimia (AAAS), transcript variant 1, mRNA [NM_015665]	AAAS	8086	0.0198532	1.01386	0.975719	0.998658	0	1021.06	1035.21	646.752	1612	1354.46	791.205	1
A_33_P3403392	ref|NM_023928|ens|ENST00000261686|ens|ENST00000316519|gb|AY091468	hs|chr12:125613943-125614002	0	AACS	NM_023928	ref|Homo sapiens acetoacetyl-CoA synthetase (AACS), mRNA [NM_023928]	AACS	65985	0.466586	1.38184	0.216933	0.987258	0	137.242	189.646	139.278	135.236	154.373	232.979	1
A_23_P204395	ref|NM_023928|ens|ENST00000261686|ens|ENST00000316543|ens|ENST00000316519	hs|chr12:125627381-125627440	0	AACS	NM_023928	ref|Homo sapiens acetoacetyl-CoA synthetase (AACS), mRNA [NM_023928]	AACS	65985	0.45717	1.37285	0.229182	0.987258	0	1094.82	1503.01	954.88	1255.26	1279.08	1766.14	1
A_33_P3302290	ref|NR_024035|ens|ENST00000503486|gb|BC024222	hs|chr5:178191952-178191893	0	AACSP1	NR_024035	ref|Homo sapiens acetoacetyl-CoA synthetase pseudogene 1 (AACSP1), non-coding RNA [NR_024035]	AACSP1	729522	-0.0729743	0.950676	0.763298	0.989802	0	37.1979	35.3631	37.6677	36.7339	34.1088	36.6635	0
A_23_P80570	ref|NM_001086|ens|ENST00000232892|gb|AK290628|gb|CR624107	hs|chr3:151545783-151545842	0	AADAC	NM_001086	ref|Homo sapiens arylacetamide deacetylase (esterase) (AADAC), mRNA [NM_001086]	AADAC	13	-1.47862	0.358831	0.189791	0.987258	0	519.015	186.239	340.103	792.043	91.0128	381.098	1
A_23_P91970	ref|NM_207365|ens|ENST00000356517|ens|ENST00000412888|gb|BC065724	hs|chr3:151475391-151475450	0	AADACL2	NM_207365	ref|Homo sapiens arylacetamide deacetylase-like 2 (AADACL2), mRNA [NM_207365]	AADACL2	344752	-0.0671015	0.954554	0.829286	0.991737	0	36.6141	34.9502	41.927	31.9745	31.2986	39.0277	0
A_33_P3307960	ref|NM_001103170|ref|NM_001103169|ens|ENST00000359318|ens|ENST00000332530	hs|chr1:12785904-12785963	0	AADACL3	NM_001103170	ref|Homo sapiens arylacetamide deacetylase-like 3 (AADACL3), transcript variant 1, mRNA [NM_001103170]	AADACL3	126767	0.0706514	1.05019	0.814467	0.991737	0	63.2934	66.4701	54.3954	73.6469	70.0887	63.0384	0
A_33_P3307965	ref|NM_001103170|ref|NM_001103169|ens|ENST00000332530|ens|ENST00000424231	hs|chr1:12788667-12788726	0	AADACL3	NM_001103170	ref|Homo sapiens arylacetamide deacetylase-like 3 (AADACL3), transcript variant 1, mRNA [NM_001103170]	AADACL3	126767	-0.28265	0.82208	0.435596	0.987258	0	175.673	144.418	149.698	206.157	167.896	124.222	1
A_33_P3312601	ref|NM_001013630|ens|ENST00000376221	hs|chr1:12727038-12727097	0	AADACL4	NM_001013630	ref|Homo sapiens arylacetamide deacetylase-like 4 (AADACL4), mRNA [NM_001013630]	AADACL4	343066	-0.443152	0.735526	0.282482	0.987258	0	63.5906	46.7726	49.4058	81.8481	45.0618	48.5482	0
A_23_P253484	ref|NM_016228|ref|NM_182662|ens|ENST00000353187|ens|ENST00000337664	hs|chr4:170981876-170981817	0	AADAT	NM_016228	ref|Homo sapiens aminoadipate aminotransferase (AADAT), transcript variant 1, mRNA [NM_016228]	AADAT	51166	0.388754	1.30926	0.396017	0.987258	0	220.222	288.328	294.447	164.707	254.561	326.573	1
A_23_P37545	ref|NM_024666|ens|ENST00000261880|gb|CR614587|gb|CR620129	hs|chr15:67494168-67494109	0	AAGAB	NM_024666	ref|Homo sapiens alpha- and gamma-adaptin binding protein (AAGAB), mRNA [NM_024666]	AAGAB	79719	0.0332951	1.02335	0.906803	0.996521	0	4110.91	4206.89	4681.88	3609.58	4393.45	4028.26	1
A_33_P3210585	ref|NM_014911|gb|CR599899|gb|AK055622|gb|CR624904	hs|chr2:69685229-69685170	0	AAK1	NM_014911	ref|Homo sapiens AP2 associated kinase 1 (AAK1), mRNA [NM_014911]	AAK1	22848	1.24515	2.37043	0.284508	0.987258	0	2811.21	6663.77	6678.2	1183.39	5143.06	8634.13	1
A_33_P3289218	ref|NM_014911|ens|ENST00000339092|gb|BX640963|gb|CR599899	hs|chr2:69686742-69686683	0	AAK1	NM_014911	ref|Homo sapiens AP2 associated kinase 1 (AAK1), mRNA [NM_014911]	AAK1	22848	1.08156	2.11633	0.364132	0.987258	0	308.563	653.02	778.107	122.362	521.634	817.498	1
A_33_P3210583	ref|NM_014911|ens|ENST00000409085	hs|chr2:69702987-69702928	0	AAK1	NM_014911	ref|Homo sapiens AP2 associated kinase 1 (AAK1), mRNA [NM_014911]	AAK1	22848	0.394922	1.31487	0.395151	0.987258	0	45.4368	59.7435	60.9473	33.8735	52.3234	68.2159	0
A_33_P3289207	gb|BC090950	hs|chr2:69870510-69870451	0	AAK1	BC090950	gb|Homo sapiens cDNA clone IMAGE:5226225. [BC090950]	AAK1	22848	0.0158249	1.01103	0.953466	0.99722	0	219.469	221.89	200.043	240.781	237.684	207.145	1
A_33_P3289204	ref|NM_014911|ens|ENST00000409085|ens|ENST00000489327|ens|ENST00000406297	hs|chr2:69736579-69736520	0	AAK1	NM_014911	ref|Homo sapiens AP2 associated kinase 1 (AAK1), mRNA [NM_014911]	AAK1	22848	-0.731155	0.602422	0.331037	0.987258	0	556.666	335.348	313.979	986.937	338.993	331.741	1
A_23_P56529	ref|NM_001087|ens|ENST00000489767|ens|ENST00000494720|ens|ENST00000475678	hs|chr2:219130152-219129897	0	AAMP	NM_001087	ref|Homo sapiens angio-associated, migratory cell protein (AAMP), mRNA [NM_001087]	AAMP	14	-0.0442138	0.969818	0.87423	0.995167	0	2335.5	2265.01	2435.72	2239.4	2005.89	2557.6	1
A_33_P3246763	ref|NM_001166579|ref|NM_001088|ens|ENST00000250615|ens|ENST00000392492	hs|chr17:74466138-74466197	0	AANAT	NM_001166579	ref|Homo sapiens aralkylamine N-acetyltransferase (AANAT), transcript variant 1, mRNA [NM_001166579]	AANAT	15	-0.639822	0.641792	0.287804	0.987258	0	112.686	72.321	73.1359	173.624	70.1691	74.5388	1
A_24_P172990	ref|NM_001605|ens|ENST00000261772|ens|ENST00000418685|gb|DQ891634	hs|chr16:70287935-70287876	0	AARS	NM_001605	ref|Homo sapiens alanyl-tRNA synthetase (AARS), mRNA [NM_001605]	AARS	16	0.0844625	1.06029	0.77653	0.989802	0	851.474	902.811	966.288	750.302	825.942	986.835	1
A_23_P383688	ref|NM_020745|ens|ENST00000244571|gb|CR612653|gb|AB033096	hs|chr6:44267479-44267420	0	AARS2	NM_020745	ref|Homo sapiens alanyl-tRNA synthetase 2, mitochondrial (putative) (AARS2), nuclear gene encoding mitochondrial protein, mRNA [NM_020745]	AARS2	57505	0.325986	1.25352	0.312529	0.987258	0	696.839	873.503	710.566	683.377	1021.5	746.949	1
A_23_P118607	ref|NM_025267|ref|NM_001136042|ens|ENST00000491665|ens|ENST00000421990	hs|chr17:41107916-41107240	0	AARSD1	NM_025267	ref|Homo sapiens alanyl-tRNA synthetase domain containing 1 (AARSD1), transcript variant 2, mRNA [NM_025267]	AARSD1	80755	-0.00876405	0.993944	0.982182	0.999346	0	1406.41	1397.89	1075.33	1839.42	1330.62	1468.56	1
A_23_P118607	ref|NM_025267|ref|NM_001136042|ens|ENST00000491665|ens|ENST00000421990	hs|chr17:41107916-41107240	0	AARSD1	NM_025267	ref|Homo sapiens alanyl-tRNA synthetase domain containing 1 (AARSD1), transcript variant 2, mRNA [NM_025267]	AARSD1	80755	-0.0255992	0.982412	0.957177	0.997352	0	1171.8	1151.19	836.786	1640.94	1011.53	1310.14	1
A_23_P118607	ref|NM_025267|ref|NM_001136042|ens|ENST00000491665|ens|ENST00000421990	hs|chr17:41107916-41107240	0	AARSD1	NM_025267	ref|Homo sapiens alanyl-tRNA synthetase domain containing 1 (AARSD1), transcript variant 2, mRNA [NM_025267]	AARSD1	80755	-0.0350738	0.975982	0.943792	0.99697	0	1235.81	1206.13	855.994	1784.17	1088.46	1336.52	1
A_23_P118607	ref|NM_025267|ref|NM_001136042|ens|ENST00000491665|ens|ENST00000421990	hs|chr17:41107916-41107240	0	AARSD1	NM_025267	ref|Homo sapiens alanyl-tRNA synthetase domain containing 1 (AARSD1), transcript variant 2, mRNA [NM_025267]	AARSD1	80755	-0.0452245	0.969139	0.907169	0.996521	0	1482.07	1436.33	1136.08	1933.42	1395.09	1478.78	1
A_23_P118607	ref|NM_025267|ref|NM_001136042|ens|ENST00000491665|ens|ENST00000421990	hs|chr17:41107916-41107240	0	AARSD1	NM_025267	ref|Homo sapiens alanyl-tRNA synthetase domain containing 1 (AARSD1), transcript variant 2, mRNA [NM_025267]	AARSD1	80755	-0.0571153	0.961184	0.893488	0.996482	0	1387.91	1334.04	1020.95	1886.77	1290.9	1378.61	1
A_23_P118607	ref|NM_025267|ref|NM_001136042|ens|ENST00000491665|ens|ENST00000421990	hs|chr17:41107916-41107240	0	AARSD1	NM_025267	ref|Homo sapiens alanyl-tRNA synthetase domain containing 1 (AARSD1), transcript variant 2, mRNA [NM_025267]	AARSD1	80755	-0.0634213	0.956992	0.883774	0.995755	0	1477.73	1414.17	1087.7	2007.61	1307.75	1529.26	1
A_23_P118607	ref|NM_025267|ref|NM_001136042|ens|ENST00000491665|ens|ENST00000421990	hs|chr17:41107916-41107240	0	AARSD1	NM_025267	ref|Homo sapiens alanyl-tRNA synthetase domain containing 1 (AARSD1), transcript variant 2, mRNA [NM_025267]	AARSD1	80755	-0.0668354	0.95473	0.874862	0.995167	0	1464.86	1398.55	1082.48	1982.33	1333.04	1467.27	1
A_23_P118607	ref|NM_025267|ref|NM_001136042|ens|ENST00000491665|ens|ENST00000421990	hs|chr17:41107916-41107240	0	AARSD1	NM_025267	ref|Homo sapiens alanyl-tRNA synthetase domain containing 1 (AARSD1), transcript variant 2, mRNA [NM_025267]	AARSD1	80755	-0.0989904	0.933686	0.810547	0.991367	0	1491.56	1392.65	1120.08	1986.23	1308.63	1482.06	1
A_23_P118607	ref|NM_025267|ref|NM_001136042|ens|ENST00000491665|ens|ENST00000421990	hs|chr17:41107916-41107240	0	AARSD1	NM_025267	ref|Homo sapiens alanyl-tRNA synthetase domain containing 1 (AARSD1), transcript variant 2, mRNA [NM_025267]	AARSD1	80755	-0.112416	0.925038	0.793845	0.990177	0	1276.89	1181.17	945.429	1724.56	1091.06	1278.72	1
A_23_P118607	ref|NM_025267|ref|NM_001136042|ens|ENST00000491665|ens|ENST00000421990	hs|chr17:41107916-41107240	0	AARSD1	NM_025267	ref|Homo sapiens alanyl-tRNA synthetase domain containing 1 (AARSD1), transcript variant 2, mRNA [NM_025267]	AARSD1	80755	-0.113854	0.924116	0.77425	0.989802	0	1475.18	1363.24	1123.98	1936.13	1307.16	1421.72	1
A_24_P383076	ref|NM_181806|ens|ENST00000502617|ens|ENST00000451613|ens|ENST00000434343	hs|chr4:57215519-57215460	0	AASDH	NM_181806	ref|Homo sapiens aminoadipate-semialdehyde dehydrogenase (AASDH), mRNA [NM_181806]	AASDH	132949	0.552737	1.46687	0.434029	0.987258	0	121.057	177.574	207.347	70.6773	198.717	158.681	1
A_23_P202988	ref|NM_015423|ens|ENST00000278618|gb|AB072896|gb|CR597963	hs|chr11:105968976-105969035	0	AASDHPPT	NM_015423	ref|Homo sapiens aminoadipate-semialdehyde dehydrogenase-phosphopantetheinyl transferase (AASDHPPT), mRNA [NM_015423]	AASDHPPT	60496	0.610597	1.52689	0.483859	0.987258	0	797.024	1216.97	1604.09	396.017	1143.95	1294.64	1
A_23_P8754	ref|NM_005763|ens|ENST00000358954|ens|ENST00000431170|ens|ENST00000417368	hs|chr7:121717911-121716622	0	AASS	NM_005763	ref|Homo sapiens aminoadipate-semialdehyde synthase (AASS), nuclear gene encoding mitochondrial protein, mRNA [NM_005763]	AASS	10157	0.318397	1.24694	0.661855	0.987258	0	553.261	689.886	616.783	496.282	1232.47	386.171	1
A_23_P89460	ref|NM_012138|ens|ENST00000225402|gb|AB385572|gb|DQ892097	hs|chr17:35378303-35388959	0	AATF	NM_012138	ref|Homo sapiens apoptosis antagonizing transcription factor (AATF), mRNA [NM_012138]	AATF	26574	0.13921	1.1013	0.576999	0.987258	0	2692.34	2965.08	2572.65	2817.59	2899.51	3032.13	1
A_23_P10559	ref|NM_001080395|ens|ENST00000374792|ens|ENST00000417379|ens|ENST00000326724	hs|chr17:79091254-79091195	0	AATK	NM_001080395	ref|Homo sapiens apoptosis-associated tyrosine kinase (AATK), mRNA [NM_001080395]	AATK	9625	0.275295	1.21024	0.596009	0.987258	0	63.8782	77.308	89.4986	45.592	63.308	94.4039	0
A_23_P10559	ref|NM_001080395|ens|ENST00000374792|ens|ENST00000417379|ens|ENST00000326724	hs|chr17:79091254-79091195	0	AATK	NM_001080395	ref|Homo sapiens apoptosis-associated tyrosine kinase (AATK), mRNA [NM_001080395]	AATK	9625	0.245076	1.18516	0.637434	0.987258	0	58.2701	69.0592	79.1626	42.8916	53.8234	88.6077	0
A_23_P10559	ref|NM_001080395|ens|ENST00000374792|ens|ENST00000417379|ens|ENST00000326724	hs|chr17:79091254-79091195	0	AATK	NM_001080395	ref|Homo sapiens apoptosis-associated tyrosine kinase (AATK), mRNA [NM_001080395]	AATK	9625	0.231003	1.17365	0.727498	0.988799	0	56.2676	66.0385	82.2497	38.4931	45.3577	96.1488	0
A_23_P10559	ref|NM_001080395|ens|ENST00000374792|ens|ENST00000417379|ens|ENST00000326724	hs|chr17:79091254-79091195	0	AATK	NM_001080395	ref|Homo sapiens apoptosis-associated tyrosine kinase (AATK), mRNA [NM_001080395]	AATK	9625	0.22622	1.16977	0.769107	0.989802	0	54.8574	64.1703	88.7808	33.8962	42.4334	97.0421	0
A_33_P3335398	ref|NM_001080395|ens|ENST00000374792|ens|ENST00000417379|ens|ENST00000326724	hs|chr17:79094061-79094002	0	AATK	NM_001080395	ref|Homo sapiens apoptosis-associated tyrosine kinase (AATK), mRNA [NM_001080395]	AATK	9625	0.152255	1.11131	0.583861	0.987258	0	39.9637	44.4118	44.0806	36.2313	47.2712	41.7254	0
A_23_P10559	ref|NM_001080395|ens|ENST00000374792|ens|ENST00000417379|ens|ENST00000326724	hs|chr17:79091254-79091195	0	AATK	NM_001080395	ref|Homo sapiens apoptosis-associated tyrosine kinase (AATK), mRNA [NM_001080395]	AATK	9625	0.0973059	1.06977	0.863978	0.994566	0	60.9142	65.1644	82.4595	44.9983	46.7827	90.7685	0
A_23_P10559	ref|NM_001080395|ens|ENST00000374792|ens|ENST00000417379|ens|ENST00000326724	hs|chr17:79091254-79091195	0	AATK	NM_001080395	ref|Homo sapiens apoptosis-associated tyrosine kinase (AATK), mRNA [NM_001080395]	AATK	9625	0.051793	1.03655	0.925929	0.99697	0	60.2364	62.4382	81.0741	44.7544	45.1739	86.3004	0
A_23_P10559	ref|NM_001080395|ens|ENST00000374792|ens|ENST00000417379|ens|ENST00000326724	hs|chr17:79091254-79091195	0	AATK	NM_001080395	ref|Homo sapiens apoptosis-associated tyrosine kinase (AATK), mRNA [NM_001080395]	AATK	9625	-0.0386803	0.973545	0.937819	0.99697	0	67.7658	65.9731	76.4367	60.0786	46.0262	94.5646	0
A_23_P10559	ref|NM_001080395|ens|ENST00000374792|ens|ENST00000417379|ens|ENST00000326724	hs|chr17:79091254-79091195	0	AATK	NM_001080395	ref|Homo sapiens apoptosis-associated tyrosine kinase (AATK), mRNA [NM_001080395]	AATK	9625	-0.136838	0.909511	0.773884	0.989802	0	71.9671	65.4548	88.8608	58.2851	49.0524	87.342	0
A_23_P10559	ref|NM_001080395|ens|ENST00000374792|ens|ENST00000417379|ens|ENST00000326724	hs|chr17:79091254-79091195	0	AATK	NM_001080395	ref|Homo sapiens apoptosis-associated tyrosine kinase (AATK), mRNA [NM_001080395]	AATK	9625	-0.143562	0.905281	0.814479	0.991737	0	67.5938	61.1914	89.7257	50.921	41.0541	91.2061	0
A_23_P10559	ref|NM_001080395|ens|ENST00000374792|ens|ENST00000417379|ens|ENST00000326724	hs|chr17:79091254-79091195	0	AATK	NM_001080395	ref|Homo sapiens apoptosis-associated tyrosine kinase (AATK), mRNA [NM_001080395]	AATK	9625	-0.145928	0.903798	0.752851	0.9898	0	71.1442	64.3	81.9846	61.7373	47.0103	87.9485	0
A_33_P3504522	ref|NR_027255|ens|ENST00000414089|gb|AK126811	hs|chr17:79156905-79156964	0	LOC388428	NR_027255	ref|Homo sapiens hypothetical LOC388428 (LOC388428), non-coding RNA [NR_027255]	AATK-AS1	388428	-0.113616	0.924268	0.640593	0.987258	0	43.582	40.2814	42.431	44.7642	39.641	40.9322	0
A_33_P3268487	ref|NM_000663|ref|NM_001127448|ref|NM_020686|ens|ENST00000396600	hs|chr16:8878258-8878317	0	ABAT	NM_000663	ref|Homo sapiens 4-aminobutyrate aminotransferase (ABAT), nuclear gene encoding mitochondrial protein, transcript variant 2, mRNA [NM_000663]	ABAT	18	0.528858	1.44279	0.67879	0.987258	0	246.394	355.494	691.472	87.798	259.245	487.476	1
A_33_P3366161	ref|NM_000663|ens|ENST00000396600|gb|AK054834|gb|BC013965	hs|chr16:8807661-8807720	0	ABAT	NM_000663	ref|Homo sapiens 4-aminobutyrate aminotransferase (ABAT), nuclear gene encoding mitochondrial protein, transcript variant 2, mRNA [NM_000663]	ABAT	18	-0.728011	0.603735	0.410322	0.987258	0	77.6697	46.8919	38.6863	155.936	43.3728	50.6965	1
A_24_P235429	ref|NM_005502|ens|ENST00000374736|gb|AK027864|gb|DJ026143	hs|chr9:107543763-107543704	0	ABCA1	NM_005502	ref|Homo sapiens ATP-binding cassette, sub-family A (ABC1), member 1 (ABCA1), mRNA [NM_005502]	ABCA1	19	0.914405	1.88479	0.31659	0.987258	0	1179.66	2223.42	2225.04	625.43	1631.73	3029.67	1
A_33_P3422897	ref|NM_005502|ens|ENST00000341579|ens|ENST00000374733|ens|ENST00000423487	hs|chr9:107624071-107624012	0	ABCA1	NM_005502	ref|Homo sapiens ATP-binding cassette, sub-family A (ABC1), member 1 (ABCA1), mRNA [NM_005502]	ABCA1	19	-0.347113	0.786156	0.506302	0.987258	0	319.972	251.548	232.732	439.913	201.303	314.334	1
A_23_P89422	ref|NM_080282|ref|NR_002451|ens|ENST00000518929|ens|ENST00000523419	hs|chr17:67144146-67144131	0	ABCA10	NM_080282	ref|Homo sapiens ATP-binding cassette, sub-family A (ABC1), member 10 (ABCA10), mRNA [NM_080282]	ABCA10	10349	-0.142984	0.905644	0.570406	0.987258	0	53.4397	48.3974	54.1296	52.7587	45.738	51.2114	0
A_23_P92602	ref|NR_002451|ens|ENST00000515578|ens|ENST00000507854|ens|ENST00000514396	hs|chr4:419931-419872	0	ABCA11P	NR_002451	ref|Homo sapiens ATP-binding cassette, sub-family A (ABC1), member 11 (pseudogene) (ABCA11P), non-coding RNA [NR_002451]	ABCA11P	79963	0.55517	1.46934	0.423533	0.987258	0	81.6665	119.996	139.402	47.843	114.253	126.027	1
A_33_P3367984	ref|NM_173076|ref|NM_015657|ens|ENST00000419637|ens|ENST00000272895	hs|chr2:215796336-215796277	0	ABCA12	NM_173076	ref|Homo sapiens ATP-binding cassette, sub-family A (ABC1), member 12 (ABCA12), transcript variant 1, mRNA [NM_173076]	ABCA12	26154	0.0265963	1.01861	0.925855	0.99697	0	39.2412	39.9713	43.1739	35.6666	44.2469	36.1088	0
A_23_P364324	ref|NM_152701|ens|ENST00000435803|gb|AK091270|gb|AX746886	hs|chr7:48686854-48686913	0	ABCA13	NM_152701	ref|Homo sapiens ATP-binding cassette, sub-family A (ABC1), member 13 (ABCA13), mRNA [NM_152701]	ABCA13	154664	-1.16948	0.444581	0.364125	0.987258	0	93.204	41.4367	259.949	33.418	36.7561	46.7134	1
A_33_P3239052	ref|NR_003574|ens|ENST00000469908|gb|DQ266102|ens|ENST00000429928	hs|chr16:2476641-2476700	0	ABCA17P	NR_003574	ref|Homo sapiens ATP-binding cassette, sub-family A (ABC1), member 17, pseudogene (ABCA17P), non-coding RNA [NR_003574]	ABCA17P	650655	-0.156266	0.897344	0.60801	0.987258	0	36.5015	32.7544	31.2424	42.6458	31.7465	33.7943	0
A_33_P3417081	ref|NR_003574|ens|ENST00000469908|gb|DQ266102|ens|ENST00000429928	hs|chr16:2429522-2429581	0	ABCA17P	NR_003574	ref|Homo sapiens ATP-binding cassette, sub-family A (ABC1), member 17, pseudogene (ABCA17P), non-coding RNA [NR_003574]	ABCA17P	650655	-0.541514	0.68705	0.146374	0.987258	0	41.3304	28.396	35.3298	48.3502	25.9675	31.0517	0
A_23_P43504	ref|NM_001606|ref|NM_212533|ens|ENST00000464520|ens|ENST00000459850	hs|chr9:139902359-139902300	0	ABCA2	NM_001606	ref|Homo sapiens ATP-binding cassette, sub-family A (ABC1), member 2 (ABCA2), transcript variant 1, mRNA [NM_001606]	ABCA2	20	0.566339	1.48076	0.223062	0.987258	0	121.086	179.3	159.214	92.0893	200.182	160.596	1
A_33_P3251672	ref|NM_001606|ref|NM_212533|ens|ENST00000398207|ens|ENST00000425423	hs|chr9:139918654-139918595	0	ABCA2	NM_001606	ref|Homo sapiens ATP-binding cassette, sub-family A (ABC1), member 2 (ABCA2), transcript variant 1, mRNA [NM_001606]	ABCA2	20	-0.374307	0.771476	0.211779	0.987258	0	78.7581	60.76	71.3158	86.9771	59.0098	62.5621	0
A_23_P140876	ref|NM_001089|ens|ENST00000436770|ens|ENST00000382381|ens|ENST00000301732	hs|chr16:2326322-2326263	0	ABCA3	NM_001089	ref|Homo sapiens ATP-binding cassette, sub-family A (ABC1), member 3 (ABCA3), mRNA [NM_001089]	ABCA3	21	0.0123203	1.00858	0.988558	0.999467	0	76.2667	76.9208	82.953	70.1193	37.627	157.249	1
A_23_P160940	ref|NM_000350|ens|ENST00000370225|gb|U88667|gb|AF001945	hs|chr1:94458680-94458621	0	ABCA4	NM_000350	ref|Homo sapiens ATP-binding cassette, sub-family A (ABC1), member 4 (ABCA4), mRNA [NM_000350]	ABCA4	24	-0.16263	0.893395	0.525954	0.987258	0	44.6491	39.8893	41.809	47.6822	40.2597	39.5222	0
A_23_P78018	ref|NM_018672|ref|NM_172232|ens|ENST00000392676|ens|ENST00000392677	hs|chr17:67243589-67243530	0	ABCA5	NM_018672	ref|Homo sapiens ATP-binding cassette, sub-family A (ABC1), member 5 (ABCA5), transcript variant 1, mRNA [NM_018672]	ABCA5	23461	0.220137	1.16484	0.697639	0.987258	0	403.792	470.355	627.871	259.684	455.984	485.178	1
A_23_P500400	ref|NM_080284|ens|ENST00000284425|ens|ENST00000446604|gb|AY028898	hs|chr17:67074908-67074849	0	ABCA6	NM_080284	ref|Homo sapiens ATP-binding cassette, sub-family A (ABC1), member 6 (ABCA6), mRNA [NM_080284]	ABCA6	23460	0.0645769	1.04578	0.947632	0.99697	0	519.872	543.671	1101.69	245.319	380.374	777.071	1
A_33_P3374623	ref|NM_019112|ens|ENST00000263094|ens|ENST00000433129|ens|ENST00000435683	hs|chr19:1065272-1065331	0	ABCA7	NM_019112	ref|Homo sapiens ATP-binding cassette, sub-family A (ABC1), member 7 (ABCA7), mRNA [NM_019112]	ABCA7	10347	0.608185	1.52434	0.59463	0.987258	0	126.267	192.473	209.802	75.9921	430.951	85.9633	1
A_23_P118615	ref|NM_007168|ens|ENST00000430352|ens|ENST00000269080|gb|AB527097	hs|chr17:66865909-66865850	0	ABCA8	NM_007168	ref|Homo sapiens ATP-binding cassette, sub-family A (ABC1), member 8 (ABCA8), mRNA [NM_007168]	ABCA8	10351	1.10991	2.15832	0.244493	0.987258	0	82.0279	177.043	165.335	40.6966	206.42	151.846	1
A_23_P118615	ref|NM_007168|ens|ENST00000430352|ens|ENST00000269080|gb|AB527097	hs|chr17:66865909-66865850	0	ABCA8	NM_007168	ref|Homo sapiens ATP-binding cassette, sub-family A (ABC1), member 8 (ABCA8), mRNA [NM_007168]	ABCA8	10351	1.01634	2.02278	0.276143	0.987258	0	78.9912	159.782	157.249	39.6799	191.131	133.575	1
A_23_P118615	ref|NM_007168|ens|ENST00000430352|ens|ENST00000269080|gb|AB527097	hs|chr17:66865909-66865850	0	ABCA8	NM_007168	ref|Homo sapiens ATP-binding cassette, sub-family A (ABC1), member 8 (ABCA8), mRNA [NM_007168]	ABCA8	10351	0.948064	1.92928	0.281955	0.987258	0	86.2133	166.33	165.299	44.9653	194.882	141.961	1
A_23_P118615	ref|NM_007168|ens|ENST00000430352|ens|ENST00000269080|gb|AB527097	hs|chr17:66865909-66865850	0	ABCA8	NM_007168	ref|Homo sapiens ATP-binding cassette, sub-family A (ABC1), member 8 (ABCA8), mRNA [NM_007168]	ABCA8	10351	0.819517	1.76482	0.282652	0.987258	0	96.9756	171.144	166.592	56.4508	205.287	142.68	1
A_23_P118615	ref|NM_007168|ens|ENST00000430352|ens|ENST00000269080|gb|AB527097	hs|chr17:66865909-66865850	0	ABCA8	NM_007168	ref|Homo sapiens ATP-binding cassette, sub-family A (ABC1), member 8 (ABCA8), mRNA [NM_007168]	ABCA8	10351	0.79474	1.73476	0.312271	0.987258	0	95.588	165.823	169.719	53.8365	196.077	140.237	1
A_23_P118615	ref|NM_007168|ens|ENST00000430352|ens|ENST00000269080|gb|AB527097	hs|chr17:66865909-66865850	0	ABCA8	NM_007168	ref|Homo sapiens ATP-binding cassette, sub-family A (ABC1), member 8 (ABCA8), mRNA [NM_007168]	ABCA8	10351	0.743594	1.67434	0.347871	0.987258	0	91.7914	153.69	165.911	50.7842	178.419	132.389	1
A_23_P118615	ref|NM_007168|ens|ENST00000430352|ens|ENST00000269080|gb|AB527097	hs|chr17:66865909-66865850	0	ABCA8	NM_007168	ref|Homo sapiens ATP-binding cassette, sub-family A (ABC1), member 8 (ABCA8), mRNA [NM_007168]	ABCA8	10351	0.737449	1.66723	0.333101	0.987258	0	87.0617	145.151	152.953	49.556	167.565	125.736	1
A_23_P118615	ref|NM_007168|ens|ENST00000430352|ens|ENST00000269080|gb|AB527097	hs|chr17:66865909-66865850	0	ABCA8	NM_007168	ref|Homo sapiens ATP-binding cassette, sub-family A (ABC1), member 8 (ABCA8), mRNA [NM_007168]	ABCA8	10351	0.542548	1.45654	0.314796	0.987258	0	111.881	162.959	156.786	79.8369	195.088	136.122	1
A_23_P118615	ref|NM_007168|ens|ENST00000430352|ens|ENST00000269080|gb|AB527097	hs|chr17:66865909-66865850	0	ABCA8	NM_007168	ref|Homo sapiens ATP-binding cassette, sub-family A (ABC1), member 8 (ABCA8), mRNA [NM_007168]	ABCA8	10351	0.530913	1.44484	0.337343	0.987258	0	114.842	165.928	163.621	80.6047	199.248	138.181	1
A_23_P118615	ref|NM_007168|ens|ENST00000430352|ens|ENST00000269080|gb|AB527097	hs|chr17:66865909-66865850	0	ABCA8	NM_007168	ref|Homo sapiens ATP-binding cassette, sub-family A (ABC1), member 8 (ABCA8), mRNA [NM_007168]	ABCA8	10351	0.460062	1.3756	0.370423	0.987258	0	121.434	167.045	165.514	89.0941	203.18	137.337	1
A_33_P3342305	ref|NM_007168|ens|ENST00000375538|ens|ENST00000430352|ens|ENST00000269080	hs|chr17:66920902-66920843	0	ABCA8	NM_007168	ref|Homo sapiens ATP-binding cassette, sub-family A (ABC1), member 8 (ABCA8), mRNA [NM_007168]	ABCA8	10351	0.361392	1.28466	0.5246	0.987258	0	192.065	246.739	272.289	135.478	318.924	190.893	1
A_33_P3292179	ref|NM_080283|ens|ENST00000370732|ens|ENST00000340001|gb|AK122687	hs|chr17:66971122-66971063	0	ABCA9	NM_080283	ref|Homo sapiens ATP-binding cassette, sub-family A (ABC1), member 9 (ABCA9), mRNA [NM_080283]	ABCA9	10350	0.398803	1.31841	0.624124	0.987258	0	13298.1	17532.5	25747.2	6868.34	18936.5	16232.5	1
A_23_P82523	ref|NM_000927|ens|ENST00000475929|ens|ENST00000415096|ens|ENST00000488737	hs|chr7:87138603-87135313	0	ABCB1	NM_000927	ref|Homo sapiens ATP-binding cassette, sub-family B (MDR/TAP), member 1 (ABCB1), mRNA [NM_000927]	ABCB1	5243	-0.79089	0.577987	0.371826	0.987258	0	86.9087	50.2322	171.484	44.0457	43.3817	58.1643	1
A_23_P82523	ref|NM_000927|ens|ENST00000475929|ens|ENST00000415096|ens|ENST00000488737	hs|chr7:87138603-87135313	0	ABCB1	NM_000927	ref|Homo sapiens ATP-binding cassette, sub-family B (MDR/TAP), member 1 (ABCB1), mRNA [NM_000927]	ABCB1	5243	-0.918957	0.528891	0.253842	0.987258	0	85.7193	45.3362	154.864	47.4468	41.3337	49.7262	1
A_23_P82523	ref|NM_000927|ens|ENST00000475929|ens|ENST00000415096|ens|ENST00000488737	hs|chr7:87138603-87135313	0	ABCB1	NM_000927	ref|Homo sapiens ATP-binding cassette, sub-family B (MDR/TAP), member 1 (ABCB1), mRNA [NM_000927]	ABCB1	5243	-0.93396	0.52342	0.310827	0.987258	0	86.0506	45.0406	171.442	43.1909	37.7484	53.7415	1
A_33_P3332414	ref|NM_000927|ens|ENST00000394661|ens|ENST00000416177|ens|ENST00000415096	hs|chr7:87229494-87229435	0	ABCB1	NM_000927	ref|Homo sapiens ATP-binding cassette, sub-family B (MDR/TAP), member 1 (ABCB1), mRNA [NM_000927]	ABCB1	5243	-0.950888	0.517314	0.222824	0.987258	0	73.5308	38.0385	128.463	42.0882	34.2362	42.2631	1
A_23_P82523	ref|NM_000927|ens|ENST00000475929|ens|ENST00000415096|ens|ENST00000488737	hs|chr7:87138603-87135313	0	ABCB1	NM_000927	ref|Homo sapiens ATP-binding cassette, sub-family B (MDR/TAP), member 1 (ABCB1), mRNA [NM_000927]	ABCB1	5243	-0.967911	0.511246	0.305694	0.987258	0	95.055	48.5964	191.398	47.2075	39.5259	59.7485	1
A_23_P82523	ref|NM_000927|ens|ENST00000475929|ens|ENST00000415096|ens|ENST00000488737	hs|chr7:87138603-87135313	0	ABCB1	NM_000927	ref|Homo sapiens ATP-binding cassette, sub-family B (MDR/TAP), member 1 (ABCB1), mRNA [NM_000927]	ABCB1	5243	-0.980065	0.506957	0.337	0.987258	0	86.9058	44.0575	190.455	39.6556	37.3963	51.9052	1
A_23_P82523	ref|NM_000927|ens|ENST00000475929|ens|ENST00000415096|ens|ENST00000488737	hs|chr7:87138603-87135313	0	ABCB1	NM_000927	ref|Homo sapiens ATP-binding cassette, sub-family B (MDR/TAP), member 1 (ABCB1), mRNA [NM_000927]	ABCB1	5243	-0.993044	0.502416	0.326123	0.987258	0	93.4492	46.9504	200.624	43.5279	38.2979	57.5579	1
A_23_P82523	ref|NM_000927|ens|ENST00000475929|ens|ENST00000415096|ens|ENST00000488737	hs|chr7:87138603-87135313	0	ABCB1	NM_000927	ref|Homo sapiens ATP-binding cassette, sub-family B (MDR/TAP), member 1 (ABCB1), mRNA [NM_000927]	ABCB1	5243	-1.01178	0.495934	0.356467	0.987258	0	81.657	40.4965	193.636	34.4351	36.2161	45.2827	1
A_23_P82523	ref|NM_000927|ens|ENST00000475929|ens|ENST00000415096|ens|ENST00000488737	hs|chr7:87138603-87135313	0	ABCB1	NM_000927	ref|Homo sapiens ATP-binding cassette, sub-family B (MDR/TAP), member 1 (ABCB1), mRNA [NM_000927]	ABCB1	5243	-1.07187	0.475703	0.253278	0.987258	0	89.4449	42.5492	179.698	44.5214	37.7044	48.0165	1
A_23_P82523	ref|NM_000927|ens|ENST00000475929|ens|ENST00000415096|ens|ENST00000488737	hs|chr7:87138603-87135313	0	ABCB1	NM_000927	ref|Homo sapiens ATP-binding cassette, sub-family B (MDR/TAP), member 1 (ABCB1), mRNA [NM_000927]	ABCB1	5243	-1.16152	0.447042	0.172001	0.987258	0	102.997	46.0442	188.386	56.3123	45.3383	46.761	1
A_23_P82523	ref|NM_000927|ens|ENST00000475929|ens|ENST00000415096|ens|ENST00000488737	hs|chr7:87138603-87135313	0	ABCB1	NM_000927	ref|Homo sapiens ATP-binding cassette, sub-family B (MDR/TAP), member 1 (ABCB1), mRNA [NM_000927]	ABCB1	5243	-1.1865	0.439369	0.165802	0.987258	0	107.958	47.4335	194.692	59.8637	41.3537	54.4072	1
A_23_P201918	ref|NM_012089|ens|ENST00000344517|gb|BC064930|gb|AF277184	hs|chr1:229652770-229652711	0	ABCB10	NM_012089	ref|Homo sapiens ATP-binding cassette, sub-family B (MDR/TAP), member 10 (ABCB10), nuclear gene encoding mitochondrial protein, mRNA [NM_012089]	ABCB10	23456	1.31843	2.49395	0.0632195	0.987258	0	211.733	528.051	277.81	161.372	385.157	723.959	1
A_32_P23624	ref|NM_012089|ens|ENST00000344517|gb|BC064930|gb|AF277184	hs|chr1:229652984-229652925	0	ABCB10	NM_012089	ref|Homo sapiens ATP-binding cassette, sub-family B (MDR/TAP), member 10 (ABCB10), nuclear gene encoding mitochondrial protein, mRNA [NM_012089]	ABCB10	23456	1.04253	2.05983	0.0777452	0.987258	0	61.6229	126.933	80.3396	47.2667	102.417	157.318	1
A_23_P39703	ref|NM_003742|ens|ENST00000263817|gb|AF091582	hs|chr2:169779620-169779561	0	ABCB11	NM_003742	ref|Homo sapiens ATP-binding cassette, sub-family B (MDR/TAP), member 11 (ABCB11), mRNA [NM_003742]	ABCB11	8647	0.136613	1.09932	0.587004	0.987258	0	34.9345	38.4042	34.6625	35.2086	40.6817	36.2542	0
A_33_P3336760	ref|NM_018849|ref|NM_000443|ref|NM_018850|ens|ENST00000358400	hs|chr7:87031442-87031383	0	ABCB4	NM_018849	ref|Homo sapiens ATP-binding cassette, sub-family B (MDR/TAP), member 4 (ABCB4), transcript variant B, mRNA [NM_018849]	ABCB4	5244	-0.397206	0.759327	0.637072	0.987258	0	95.4069	72.4451	56.4107	161.361	46.2322	113.52	1
A_23_P111662	ref|NM_178559|ref|NM_001163941|ens|ENST00000258738|ens|ENST00000404938	hs|chr7:20795142-20795201	0	ABCB5	NM_178559	ref|Homo sapiens ATP-binding cassette, sub-family B (MDR/TAP), member 5 (ABCB5), transcript variant 2, mRNA [NM_178559]	ABCB5	340273	0.115695	1.0835	0.649059	0.987258	0	36.4995	39.5471	37.2406	35.7731	36.9466	42.3305	0
A_23_P111662	ref|NM_178559|ref|NM_001163941|ens|ENST00000258738|ens|ENST00000404938	hs|chr7:20795142-20795201	0	ABCB5	NM_178559	ref|Homo sapiens ATP-binding cassette, sub-family B (MDR/TAP), member 5 (ABCB5), transcript variant 2, mRNA [NM_178559]	ABCB5	340273	0.0835424	1.05962	0.786423	0.989802	0	34.3444	36.3919	37.108	31.7866	31.2813	42.3375	0
A_23_P111662	ref|NM_178559|ref|NM_001163941|ens|ENST00000258738|ens|ENST00000404938	hs|chr7:20795142-20795201	0	ABCB5	NM_178559	ref|Homo sapiens ATP-binding cassette, sub-family B (MDR/TAP), member 5 (ABCB5), transcript variant 2, mRNA [NM_178559]	ABCB5	340273	0.0707793	1.05028	0.783316	0.989802	0	34.8456	36.5978	37.85	32.0797	37.3164	35.893	0
A_23_P111662	ref|NM_178559|ref|NM_001163941|ens|ENST00000258738|ens|ENST00000404938	hs|chr7:20795142-20795201	0	ABCB5	NM_178559	ref|Homo sapiens ATP-binding cassette, sub-family B (MDR/TAP), member 5 (ABCB5), transcript variant 2, mRNA [NM_178559]	ABCB5	340273	0.068661	1.04874	0.811016	0.991367	0	35.5568	37.2899	31.044	40.7255	38.5756	36.0471	0
A_23_P111662	ref|NM_178559|ref|NM_001163941|ens|ENST00000258738|ens|ENST00000404938	hs|chr7:20795142-20795201	0	ABCB5	NM_178559	ref|Homo sapiens ATP-binding cassette, sub-family B (MDR/TAP), member 5 (ABCB5), transcript variant 2, mRNA [NM_178559]	ABCB5	340273	0.0682541	1.04845	0.78318	0.989802	0	36.1243	37.8745	34.9021	37.3893	36.0323	39.8108	0
A_33_P3337549	ref|NM_001163942|ens|ENST00000443026|gb|BC044248	hs|chr7:20699676-20699735	0	ABCB5	NM_001163942	ref|Homo sapiens ATP-binding cassette, sub-family B (MDR/TAP), member 5 (ABCB5), transcript variant 3, mRNA [NM_001163942]	ABCB5	340273	0.0659435	1.04677	0.79918	0.990294	0	36.2992	37.9969	33.4129	39.4348	36.7317	39.3056	0
A_23_P111662	ref|NM_178559|ref|NM_001163941|ens|ENST00000258738|ens|ENST00000404938	hs|chr7:20795142-20795201	0	ABCB5	NM_178559	ref|Homo sapiens ATP-binding cassette, sub-family B (MDR/TAP), member 5 (ABCB5), transcript variant 2, mRNA [NM_178559]	ABCB5	340273	0.0628909	1.04456	0.836224	0.99249	0	33.2141	34.694	39.1403	28.1851	35.3757	34.0253	0
A_23_P111662	ref|NM_178559|ref|NM_001163941|ens|ENST00000258738|ens|ENST00000404938	hs|chr7:20795142-20795201	0	ABCB5	NM_178559	ref|Homo sapiens ATP-binding cassette, sub-family B (MDR/TAP), member 5 (ABCB5), transcript variant 2, mRNA [NM_178559]	ABCB5	340273	0.0602341	1.04263	0.810974	0.991367	0	34.1825	35.6398	32.1842	36.3048	34.2384	37.0986	0
A_33_P3337554	ref|NM_001163993|gb|BC110370|ens|ENST00000406935	hs|chr7:20706867-20706926	0	ABCB5	NM_001163993	ref|Homo sapiens ATP-binding cassette, sub-family B (MDR/TAP), member 5 (ABCB5), transcript variant 4, mRNA [NM_001163993]	ABCB5	340273	0.0486498	1.0343	0.842668	0.992672	0	34.0716	35.2402	34.9733	33.1932	36.916	33.6404	0
A_23_P111662	ref|NM_178559|ref|NM_001163941|ens|ENST00000258738|ens|ENST00000404938	hs|chr7:20795142-20795201	0	ABCB5	NM_178559	ref|Homo sapiens ATP-binding cassette, sub-family B (MDR/TAP), member 5 (ABCB5), transcript variant 2, mRNA [NM_178559]	ABCB5	340273	-0.00538748	0.996273	0.984443	0.999353	0	38.6738	38.5296	43.6429	34.2704	39.6743	37.418	0
A_23_P111662	ref|NM_178559|ref|NM_001163941|ens|ENST00000258738|ens|ENST00000404938	hs|chr7:20795142-20795201	0	ABCB5	NM_178559	ref|Homo sapiens ATP-binding cassette, sub-family B (MDR/TAP), member 5 (ABCB5), transcript variant 2, mRNA [NM_178559]	ABCB5	340273	-0.0327757	0.977538	0.928415	0.99697	0	39.5339	38.6459	31.0894	50.2721	39.7144	37.6061	0
A_23_P111662	ref|NM_178559|ref|NM_001163941|ens|ENST00000258738|ens|ENST00000404938	hs|chr7:20795142-20795201	0	ABCB5	NM_178559	ref|Homo sapiens ATP-binding cassette, sub-family B (MDR/TAP), member 5 (ABCB5), transcript variant 2, mRNA [NM_178559]	ABCB5	340273	-0.40003	0.757842	0.165367	0.987258	0	43.6646	33.0909	41.1302	46.3551	32.5642	33.626	0
A_23_P5441	ref|NM_005689|ens|ENST00000443805|ens|ENST00000446716|ens|ENST00000497882	hs|chr2:220074557-220074498	0	ABCB6	NM_005689	ref|Homo sapiens ATP-binding cassette, sub-family B (MDR/TAP), member 6 (ABCB6), nuclear gene encoding mitochondrial protein, mRNA [NM_005689]	ABCB6	10058	-0.190897	0.876061	0.670914	0.987258	0	1808.43	1584.3	1310.56	2495.45	1500.56	1672.7	1
A_23_P171258	ref|NM_004299|ens|ENST00000490858|ens|ENST00000373394|ens|ENST00000253577	hs|chrX:74273393-74273334	0	ABCB7	NM_004299	ref|Homo sapiens ATP-binding cassette, sub-family B (MDR/TAP), member 7 (ABCB7), nuclear gene encoding mitochondrial protein, mRNA [NM_004299]	ABCB7	22	0.0146931	1.01024	0.97391	0.998521	0	958.975	968.792	742.55	1238.48	1198.88	782.862	1
A_23_P82249	ref|NM_007188|ens|ENST00000482309|ens|ENST00000482899|ens|ENST00000356058	hs|chr7:150742296-150742355	0	ABCB8	NM_007188	ref|Homo sapiens ATP-binding cassette, sub-family B (MDR/TAP), member 8 (ABCB8), nuclear gene encoding mitochondrial protein, mRNA [NM_007188]	ABCB8	11194	0.356868	1.28064	0.336004	0.987258	0	98.1768	125.729	78.8878	122.182	125.475	125.984	1
A_33_P3336780	ref|NM_007188|ens|ENST00000358849|gb|AL117497|gb|AF086382	hs|chr7:150744762-150744821	0	ABCB8	NM_007188	ref|Homo sapiens ATP-binding cassette, sub-family B (MDR/TAP), member 8 (ABCB8), nuclear gene encoding mitochondrial protein, mRNA [NM_007188]	ABCB8	11194	0.0638067	1.04522	0.911824	0.996692	0	344.405	359.979	415.549	285.441	237.193	546.326	1
A_23_P128094	ref|NM_019625|ref|NM_203444|ref|NM_019624|ens|ENST00000392439	hs|chr12:123414131-123414072	0	ABCB9	NM_019625	ref|Homo sapiens ATP-binding cassette, sub-family B (MDR/TAP), member 9 (ABCB9), transcript variant 1, mRNA [NM_019625]	ABCB9	23457	0.00876132	1.00609	0.973442	0.998498	0	96.8079	97.3976	104.687	89.5216	91.4565	103.725	1
A_33_P3376947	ens|ENST00000344275|gb|AK027624|gb|AL833963|tc|NP500889	hs|chr12:123416788-123416729	0	ENST00000344275	ENST00000344275	ens|ATP-binding cassette, sub-family B (MDR/TAP), member 9 [Source:HGNC Symbol;Acc:50] [ENST00000344275]	ABCB9	23457	-0.221647	0.857586	0.562514	0.987258	0	83.1422	71.3015	87.8085	78.7238	55.7932	91.1207	0
A_24_P227831	ref|NM_019862|ref|NM_004996|ref|NM_019898|ref|NM_019900	hs|chr16:16236024-16236083	0	ABCC1	NM_019862	ref|Homo sapiens ATP-binding cassette, sub-family C (CFTR/MRP), member 1 (ABCC1), transcript variant 2, mRNA [NM_019862]	ABCC1	4363	0.694988	1.61887	0.382525	0.987258	0	575.003	930.856	1059.04	312.198	1036.65	835.857	1
A_23_P219013	ref|NM_033450|ref|NM_001198934|ens|ENST00000244533|ens|ENST00000463024	hs|chr6:43416902-43417178	0	ABCC10	NM_033450	ref|Homo sapiens ATP-binding cassette, sub-family C (CFTR/MRP), member 10 (ABCC10), transcript variant MRP7A, mRNA [NM_033450]	ABCC10	89845	-0.0202107	0.986089	0.95133	0.99697	0	434.086	428.047	438.554	429.663	349.905	523.64	1
A_33_P3372563	ref|NM_033450|ref|NM_001198934|ens|ENST00000372512|ens|ENST00000244533	hs|chr6:43412934-43412993	0	ABCC10	NM_033450	ref|Homo sapiens ATP-binding cassette, sub-family C (CFTR/MRP), member 10 (ABCC10), transcript variant MRP7A, mRNA [NM_033450]	ABCC10	89845	-0.849653	0.554918	0.274261	0.987258	0	537.241	298.125	301.508	957.279	316.704	280.635	1
A_23_P141076	ref|NM_033151|ref|NM_032583|ref|NM_145186|ens|ENST00000394747	hs|chr16:48201112-48201053	0	ABCC11	NM_033151	ref|Homo sapiens ATP-binding cassette, sub-family C (CFTR/MRP), member 11 (ABCC11), transcript variant 2, mRNA [NM_033151]	ABCC11	85320	-0.0127718	0.991186	0.960313	0.997354	0	37.3976	37.068	35.238	39.6895	39.4775	34.8055	0
A_24_P287766	ref|NM_033226|ens|ENST00000416054|ens|ENST00000448542|ens|ENST00000449939	hs|chr16:48117680-48117621	0	ABCC12	NM_033226	ref|Homo sapiens ATP-binding cassette, sub-family C (CFTR/MRP), member 12 (ABCC12), mRNA [NM_033226]	ABCC12	94160	-0.198279	0.87159	0.440054	0.987258	0	34.1622	29.7754	32.5768	35.8247	30.6638	28.9127	0
A_23_P397480	ref|NR_003088|ens|ENST00000400570|ens|ENST00000400574|gb|AF518321	hs|chr21:15660784-15660843	0	ABCC13	NR_003088	ref|Homo sapiens ATP-binding cassette, sub-family C (CFTR/MRP), member 13, pseudogene (ABCC13), transcript variant D, non-coding RNA [NR_003088]	ABCC13	150000	0.0507566	1.03581	0.849562	0.993091	0	34.0962	35.3171	37.8746	30.6947	34.5119	36.1411	0
A_23_P307570	ref|NR_003087|ens|ENST00000400572|ens|ENST00000400571|ens|ENST00000467409	hs|chr21:15673348-15673407	0	ABCC13	NR_003087	ref|Homo sapiens ATP-binding cassette, sub-family C (CFTR/MRP), member 13, pseudogene (ABCC13), transcript variant A, non-coding RNA [NR_003087]	ABCC13	150000	-0.272956	0.827622	0.423061	0.987258	0	41.6009	34.4298	34.6822	49.8998	36.728	32.2754	0
A_23_P44569	ref|NM_000392|ens|ENST00000370449|gb|BC136419|gb|X96395	hs|chr10:101611322-101611381	0	ABCC2	NM_000392	ref|Homo sapiens ATP-binding cassette, sub-family C (CFTR/MRP), member 2 (ABCC2), mRNA [NM_000392]	ABCC2	1244	-0.469865	0.722032	0.112812	0.987258	0	89.0114	64.2691	88.3995	89.6276	61.6579	66.9909	0
A_23_P207507	ref|NM_003786|ens|ENST00000503337|ens|ENST00000502426|ens|ENST00000505699	hs|chr17:48768701-48768760	0	ABCC3	NM_003786	ref|Homo sapiens ATP-binding cassette, sub-family C (CFTR/MRP), member 3 (ABCC3), transcript variant 1, mRNA [NM_003786]	ABCC3	8714	-0.342374	0.788742	0.772292	0.989802	0	1840.2	1451.45	3597.82	941.224	3063.72	687.628	1
A_33_P3298024	ref|NM_001144070|ens|ENST00000427699|gb|FV124444|gb|BC046126	hs|chr17:48745220-48745279	0	ABCC3	NM_001144070	ref|Homo sapiens ATP-binding cassette, sub-family C (CFTR/MRP), member 3 (ABCC3), transcript variant 2, mRNA [NM_001144070]	ABCC3	8714	-0.585359	0.666483	0.190748	0.987258	0	1568.84	1045.6	1242.8	1980.41	911.493	1199.45	1
A_24_P16913	ref|NM_005845|ref|NM_001105515|ens|ENST00000431522|ens|ENST00000376887	hs|chr13:95815416-95813571	0	ABCC4	NM_005845	ref|Homo sapiens ATP-binding cassette, sub-family C (CFTR/MRP), member 4 (ABCC4), transcript variant 1, mRNA [NM_005845]	ABCC4	10257	0.741137	1.67149	0.27238	0.987258	0	159.051	265.853	246.722	102.534	333.247	212.089	1
A_23_P258221	ref|NM_005688|ens|ENST00000437205|ens|ENST00000382495|ens|ENST00000265586	hs|chr3:183637801-183637742	0	ABCC5	NM_005688	ref|Homo sapiens ATP-binding cassette, sub-family C (CFTR/MRP), member 5 (ABCC5), transcript variant 1, mRNA [NM_005688]	ABCC5	10057	0.316879	1.24563	0.603877	0.987258	0	524.427	653.243	828.034	332.14	565.63	754.428	1
A_33_P3298062	ref|NM_001023587|ens|ENST00000443376|gb|CR590924|gb|AK090667	hs|chr3:183701626-183701567	0	ABCC5	NM_001023587	ref|Homo sapiens ATP-binding cassette, sub-family C (CFTR/MRP), member 5 (ABCC5), transcript variant 2, mRNA [NM_001023587]	ABCC5	10057	0.00604047	1.0042	0.991593	0.999746	0	373.539	375.106	581.96	239.761	415.816	338.381	1
A_33_P3298057	ref|NM_001023587|ens|ENST00000392578|ens|ENST00000438979|ens|ENST00000392577	hs|chr3:183705645-183705586	0	ABCC5	NM_001023587	ref|Homo sapiens ATP-binding cassette, sub-family C (CFTR/MRP), member 5 (ABCC5), transcript variant 2, mRNA [NM_001023587]	ABCC5	10057	-0.0777303	0.947547	0.796251	0.990177	0	148.283	140.505	172.483	127.478	133.297	148.103	1
A_23_P100539	ref|NM_001171|ens|ENST00000456970|ens|ENST00000205558|ens|ENST00000205557	hs|chr16:16243914-16243855	0	ABCC6	NM_001171	ref|Homo sapiens ATP-binding cassette, sub-family C (CFTR/MRP), member 6 (ABCC6), transcript variant 1, mRNA [NM_001171]	ABCC6	368	0.678091	1.60002	0.0596508	0.987258	0	38.7002	61.9211	41.3585	36.2127	67.5843	56.7325	0
A_33_P3385266	ref|NM_001079528|ref|NR_023387|gb|U66689|gb|BC015978	hs|chr16:16315206-16315147	0	ABCC6	NM_001079528	ref|Homo sapiens ATP-binding cassette, sub-family C (CFTR/MRP), member 6 (ABCC6), transcript variant 2, mRNA [NM_001079528]	ABCC6	368	0.558664	1.4729	0.579173	0.987258	0	108.917	160.425	54.0533	219.469	251.409	102.368	1
A_23_P100539	ref|NM_001171|ens|ENST00000456970|ens|ENST00000205558|ens|ENST00000205557	hs|chr16:16243914-16243855	0	ABCC6	NM_001171	ref|Homo sapiens ATP-binding cassette, sub-family C (CFTR/MRP), member 6 (ABCC6), transcript variant 1, mRNA [NM_001171]	ABCC6	368	0.411432	1.33001	0.24924	0.987258	0	49.0997	65.3028	47.1889	51.0879	78.6052	54.2516	0
A_23_P100539	ref|NM_001171|ens|ENST00000456970|ens|ENST00000205558|ens|ENST00000205557	hs|chr16:16243914-16243855	0	ABCC6	NM_001171	ref|Homo sapiens ATP-binding cassette, sub-family C (CFTR/MRP), member 6 (ABCC6), transcript variant 1, mRNA [NM_001171]	ABCC6	368	0.411186	1.32978	0.287816	0.987258	0	52.0479	69.2122	47.731	56.7552	85.5866	55.9705	0
A_23_P100539	ref|NM_001171|ens|ENST00000456970|ens|ENST00000205558|ens|ENST00000205557	hs|chr16:16243914-16243855	0	ABCC6	NM_001171	ref|Homo sapiens ATP-binding cassette, sub-family C (CFTR/MRP), member 6 (ABCC6), transcript variant 1, mRNA [NM_001171]	ABCC6	368	0.378667	1.30014	0.269393	0.987258	0	52.8034	68.6518	49.7913	55.9977	81.0714	58.1348	0
A_23_P100539	ref|NM_001171|ens|ENST00000456970|ens|ENST00000205558|ens|ENST00000205557	hs|chr16:16243914-16243855	0	ABCC6	NM_001171	ref|Homo sapiens ATP-binding cassette, sub-family C (CFTR/MRP), member 6 (ABCC6), transcript variant 1, mRNA [NM_001171]	ABCC6	368	0.364883	1.28778	0.239194	0.987258	0	53.2198	68.5353	49.7932	56.8822	76.3407	61.5279	0
A_23_P100539	ref|NM_001171|ens|ENST00000456970|ens|ENST00000205558|ens|ENST00000205557	hs|chr16:16243914-16243855	0	ABCC6	NM_001171	ref|Homo sapiens ATP-binding cassette, sub-family C (CFTR/MRP), member 6 (ABCC6), transcript variant 1, mRNA [NM_001171]	ABCC6	368	0.341846	1.26738	0.287461	0.987258	0	49.9392	63.2918	48.3403	51.5909	73.4205	54.5603	0
A_23_P100539	ref|NM_001171|ens|ENST00000456970|ens|ENST00000205558|ens|ENST00000205557	hs|chr16:16243914-16243855	0	ABCC6	NM_001171	ref|Homo sapiens ATP-binding cassette, sub-family C (CFTR/MRP), member 6 (ABCC6), transcript variant 1, mRNA [NM_001171]	ABCC6	368	0.335779	1.26206	0.314389	0.987258	0	55.1665	69.6234	54.6458	55.6922	82.68	58.6287	0
A_23_P15272	ref|NM_001079528|gb|BC050733	hs|chr16:16315134-16315075	0	ABCC6	NM_001079528	ref|Homo sapiens ATP-binding cassette, sub-family C (CFTR/MRP), member 6 (ABCC6), transcript variant 2, mRNA [NM_001079528]	ABCC6	368	0.204578	1.15235	0.857434	0.994429	0	254.534	293.312	107.861	600.654	459.242	187.334	1
A_23_P100539	ref|NM_001171|ens|ENST00000456970|ens|ENST00000205558|ens|ENST00000205557	hs|chr16:16243914-16243855	0	ABCC6	NM_001171	ref|Homo sapiens ATP-binding cassette, sub-family C (CFTR/MRP), member 6 (ABCC6), transcript variant 1, mRNA [NM_001171]	ABCC6	368	0.190744	1.14135	0.577737	0.987258	0	57.939	66.1288	50.0269	67.1025	76.4232	57.2211	0
A_23_P100539	ref|NM_001171|ens|ENST00000456970|ens|ENST00000205558|ens|ENST00000205557	hs|chr16:16243914-16243855	0	ABCC6	NM_001171	ref|Homo sapiens ATP-binding cassette, sub-family C (CFTR/MRP), member 6 (ABCC6), transcript variant 1, mRNA [NM_001171]	ABCC6	368	-0.156727	0.897058	0.789566	0.989802	0	68.6598	61.5918	44.4626	106.025	72.788	52.1179	1
A_33_P3298043	ref|NM_001079528|ref|NR_023387|gb|BC015978|gb|BC050733	hs|chr16:16315484-16315425	0	ABCC6	NM_001079528	ref|Homo sapiens ATP-binding cassette, sub-family C (CFTR/MRP), member 6 (ABCC6), transcript variant 2, mRNA [NM_001079528]	ABCC6	368	-0.408735	0.753284	0.60794	0.987258	0	113.268	85.3233	61.1407	209.84	104.323	69.7839	1
A_23_P100539	ref|NM_001171|ens|ENST00000456970|ens|ENST00000205558|ens|ENST00000205557	hs|chr16:16243914-16243855	0	ABCC6	NM_001171	ref|Homo sapiens ATP-binding cassette, sub-family C (CFTR/MRP), member 6 (ABCC6), transcript variant 1, mRNA [NM_001171]	ABCC6	368	-1.13101	0.456594	0.404404	0.987258	0	142.725	65.1673	48.6501	418.711	82.0986	51.7277	1
A_33_P3316278	ref|NR_003569|gb|BC075833	hs|chr16:18609500-18609559	0	ABCC6P1	NR_003569	ref|Homo sapiens ATP-binding cassette, sub-family C, member 6 pseudogene 1 (ABCC6P1), non-coding RNA [NR_003569]	ABCC6P1	653190	0.334984	1.26136	0.449557	0.987258	0	43.0609	54.3155	40.0201	46.3328	73.1359	40.3382	0
A_23_P24774	ref|NM_000352|ens|ENST00000302539|ens|ENST00000389817|ens|ENST00000379493	hs|chr11:17414661-17414602	0	ABCC8	NM_000352	ref|Homo sapiens ATP-binding cassette, sub-family C (CFTR/MRP), member 8 (ABCC8), mRNA [NM_000352]	ABCC8	6833	-0.726704	0.604283	0.349685	0.987258	0	108.938	65.8297	59.9621	197.918	63.8593	67.8609	1
A_24_P178503	ref|NM_020298|ref|NM_005691|ref|NM_020297|ens|ENST00000326684	hs|chr12:22078955-22078896	0	ABCC9	NM_020298	ref|Homo sapiens ATP-binding cassette, sub-family C (CFTR/MRP), member 9 (ABCC9), transcript variant SUR2A-delta-14, mRNA [NM_020298]	ABCC9	10060	1.09955	2.14288	0.163291	0.987258	0	143.306	307.087	98.9487	207.548	461.598	204.296	1
A_23_P368691	ref|NM_005691|ref|NM_020298|ens|ENST00000261201|ens|ENST00000345162	hs|chr12:21965020-21962868	0	ABCC9	NM_005691	ref|Homo sapiens ATP-binding cassette, sub-family C (CFTR/MRP), member 9 (ABCC9), transcript variant SUR2A, mRNA [NM_005691]	ABCC9	10060	0.614965	1.53152	0.297457	0.987258	0	53.5234	81.9722	74.3697	38.5205	107.265	62.6436	1
A_33_P3224660	ref|NM_000033|ens|ENST00000218104|gb|DQ891000|gb|DQ894177	hs|chrX:153008953-153009012	0	ABCD1	NM_000033	ref|Homo sapiens ATP-binding cassette, sub-family D (ALD), member 1 (ABCD1), mRNA [NM_000033]	ABCD1	215	0.288561	1.22142	0.388164	0.987258	0	78.1655	95.473	89.2751	68.4383	84.3253	108.094	1
A_23_P148556	ref|NM_000033|ens|ENST00000218104|gb|CR599919|gb|BC015541	hs|chrX:153009809-153009868	0	ABCD1	NM_000033	ref|Homo sapiens ATP-binding cassette, sub-family D (ALD), member 1 (ABCD1), mRNA [NM_000033]	ABCD1	215	0.228368	1.17151	0.402781	0.987258	0	496.194	581.295	505.409	487.146	531.967	635.197	1
A_23_P388124	ref|NM_005164|ens|ENST00000308666|gb|AJ000327	hs|chr12:39947009-39946950	0	ABCD2	NM_005164	ref|Homo sapiens ATP-binding cassette, sub-family D (ALD), member 2 (ABCD2), mRNA [NM_005164]	ABCD2	225	0.08696	1.06213	0.719583	0.987905	0	36.5454	38.816	36.0635	37.0338	37.6134	40.057	0
A_33_P3307957	ref|NM_001122674|ens|ENST00000315713|gb|BT006644|gb|BC009712	hs|chr1:94941224-94941283	0	ABCD3	NM_001122674	ref|Homo sapiens ATP-binding cassette, sub-family D (ALD), member 3 (ABCD3), transcript variant 2, mRNA [NM_001122674]	ABCD3	5825	-0.0565281	0.961575	0.86851	0.994566	0	216.203	207.896	181.736	257.208	183.537	235.488	1
A_33_P3307955	ref|NM_001122674|ens|ENST00000315713|gb|BC009712	hs|chr1:94944201-94944260	0	ABCD3	NM_001122674	ref|Homo sapiens ATP-binding cassette, sub-family D (ALD), member 3 (ABCD3), transcript variant 2, mRNA [NM_001122674]	ABCD3	5825	-0.444724	0.734725	0.510508	0.987258	0	392.604	288.456	250.183	616.101	217.815	382.008	1
A_23_P37327	ref|NM_005050|ref|NR_003256|ens|ENST00000481935|ens|ENST00000481348	hs|chr14:74752793-74752734	0	ABCD4	NM_005050	ref|Homo sapiens ATP-binding cassette, sub-family D (ALD), member 4 (ABCD4), transcript variant 1, mRNA [NM_005050]	ABCD4	5826	-0.332991	0.793889	0.289564	0.987258	0	978.245	776.618	1063.79	899.58	871.768	691.853	1
A_33_P3399598	gb|AK125109	hs|chr14:74766285-74766344	0	ABCD4	AK125109	gb|Homo sapiens cDNA FLJ43119 fis, clone CTONG3003179. [AK125109]	ABCD4	5826	-0.351134	0.783968	0.426995	0.987258	0	76.1923	59.7323	56.934	101.965	64.9906	54.8994	1
A_23_P41380	ref|NM_002940|ref|NM_001040876|ens|ENST00000296577|ens|ENST00000455563	hs|chr4:146049642-146049701	0	ABCE1	NM_002940	ref|Homo sapiens ATP-binding cassette, sub-family E (OABP), member 1 (ABCE1), transcript variant 1, mRNA [NM_002940]	ABCE1	6059	1.24614	2.37207	0.158702	0.987258	0	806.199	1912.36	1462.51	444.411	1589.6	2300.65	1
A_32_P108474	ref|NM_002940|ref|NM_001040876|ens|ENST00000296577|ens|ENST00000455563	hs|chr4:146048917-146048976	0	ABCE1	NM_002940	ref|Homo sapiens ATP-binding cassette, sub-family E (OABP), member 1 (ABCE1), transcript variant 1, mRNA [NM_002940]	ABCE1	6059	0.697783	1.62201	0.0910505	0.987258	0	461.708	748.895	527.584	404.058	648.336	865.051	1
A_23_P251660	ref|NM_001025091|ref|NM_001090|ens|ENST00000383588|ens|ENST00000419893	hs|chr6:30558633-30558692	0	ABCF1	NM_001025091	ref|Homo sapiens ATP-binding cassette, sub-family F (GCN20), member 1 (ABCF1), transcript variant 1, mRNA [NM_001025091]	ABCF1	23	0.079269	1.05648	0.851831	0.993477	0	2764.42	2920.56	3473.01	2200.4	2382.11	3580.72	1
A_23_P215175	ref|NM_005692|ens|ENST00000222388|gb|BT007451|gb|DQ892304	hs|chr7:150912012-150911266	0	ABCF2	NM_005692	ref|Homo sapiens ATP-binding cassette, sub-family F (GCN20), member 2 (ABCF2), nuclear gene encoding mitochondrial protein, transcript variant 2, mRNA [NM_005692]	ABCF2	10061	0.176226	1.12992	0.495086	0.987258	0	1851	2091.49	1846.23	1855.79	1954.15	2238.49	1
A_24_P251688	ref|NM_018358|ens|ENST00000468892|ens|ENST00000292808|ens|ENST00000480562	hs|chr3:183911585-183911644	0	ABCF3	NM_018358	ref|Homo sapiens ATP-binding cassette, sub-family F (GCN20), member 3 (ABCF3), mRNA [NM_018358]	ABCF3	55324	-0.227866	0.853897	0.491761	0.987258	0	3835.59	3275.2	4593.72	3202.58	3442.62	3115.92	1
A_23_P166297	ref|NM_207627|ref|NM_207628|ref|NM_004915|ref|NM_207174	hs|chr21:43716784-43716843	0	ABCG1	NM_207627	ref|Homo sapiens ATP-binding cassette, sub-family G (WHITE), member 1 (ABCG1), transcript variant 5, mRNA [NM_207627]	ABCG1	9619	-1.05651	0.480794	0.125704	0.987258	0	201.304	96.7859	134.787	300.649	78.4998	119.332	1
A_33_P3361067	ref|NM_004827|ens|ENST00000237612|ens|ENST00000515655|gb|BC092408	hs|chr4:89011562-89011503	0	ABCG2	NM_004827	ref|Homo sapiens ATP-binding cassette, sub-family G (WHITE), member 2 (ABCG2), mRNA [NM_004827]	ABCG2	9429	-0.020305	0.986024	0.952101	0.997151	0	73.803	72.7716	60.574	89.9211	67.6952	78.2286	0
A_24_P355626	ref|NM_022169|ref|NM_001142505|ens|ENST00000307417|ens|ENST00000449422	hs|chr11:119033297-119033356	0	ABCG4	NM_022169	ref|Homo sapiens ATP-binding cassette, sub-family G (WHITE), member 4 (ABCG4), transcript variant 1, mRNA [NM_022169]	ABCG4	64137	0.361838	1.28506	0.251303	0.987258	0	62.4873	80.3001	55.9586	69.7778	74.0179	87.1154	0
A_23_P119763	ref|NM_022436|ens|ENST00000409962|ens|ENST00000486512|ens|ENST00000260645	hs|chr2:44040115-44040056	0	ABCG5	NM_022436	ref|Homo sapiens ATP-binding cassette, sub-family G (WHITE), member 5 (ABCG5), mRNA [NM_022436]	ABCG5	64240	-0.573825	0.671833	0.490965	0.987258	0	96.0553	64.5331	49.2521	187.334	62.3516	66.791	1
A_23_P119763	ref|NM_022436|ens|ENST00000409962|ens|ENST00000486512|ens|ENST00000260645	hs|chr2:44040115-44040056	0	ABCG5	NM_022436	ref|Homo sapiens ATP-binding cassette, sub-family G (WHITE), member 5 (ABCG5), mRNA [NM_022436]	ABCG5	64240	-0.612119	0.654235	0.480821	0.987258	0	98.2649	64.2883	49.998	193.127	53.8844	76.701	1
A_23_P119763	ref|NM_022436|ens|ENST00000409962|ens|ENST00000486512|ens|ENST00000260645	hs|chr2:44040115-44040056	0	ABCG5	NM_022436	ref|Homo sapiens ATP-binding cassette, sub-family G (WHITE), member 5 (ABCG5), mRNA [NM_022436]	ABCG5	64240	-0.691718	0.619116	0.477366	0.987258	0	102.925	63.7228	46.7674	226.518	61.7762	65.7308	1
A_23_P119763	ref|NM_022436|ens|ENST00000409962|ens|ENST00000486512|ens|ENST00000260645	hs|chr2:44040115-44040056	0	ABCG5	NM_022436	ref|Homo sapiens ATP-binding cassette, sub-family G (WHITE), member 5 (ABCG5), mRNA [NM_022436]	ABCG5	64240	-0.700558	0.615334	0.431012	0.987258	0	102.283	62.938	50.6659	206.485	69.529	56.9718	1
A_23_P119763	ref|NM_022436|ens|ENST00000409962|ens|ENST00000486512|ens|ENST00000260645	hs|chr2:44040115-44040056	0	ABCG5	NM_022436	ref|Homo sapiens ATP-binding cassette, sub-family G (WHITE), member 5 (ABCG5), mRNA [NM_022436]	ABCG5	64240	-0.774634	0.584537	0.419559	0.987258	0	101.19	59.1491	46.9682	218.006	60.467	57.8599	1
A_23_P119763	ref|NM_022436|ens|ENST00000409962|ens|ENST00000486512|ens|ENST00000260645	hs|chr2:44040115-44040056	0	ABCG5	NM_022436	ref|Homo sapiens ATP-binding cassette, sub-family G (WHITE), member 5 (ABCG5), mRNA [NM_022436]	ABCG5	64240	-0.871096	0.546731	0.417761	0.987258	0	118.589	64.836	49.918	281.727	67.2301	62.5273	1
A_23_P119763	ref|NM_022436|ens|ENST00000409962|ens|ENST00000486512|ens|ENST00000260645	hs|chr2:44040115-44040056	0	ABCG5	NM_022436	ref|Homo sapiens ATP-binding cassette, sub-family G (WHITE), member 5 (ABCG5), mRNA [NM_022436]	ABCG5	64240	-0.971394	0.510013	0.32005	0.987258	0	117.048	59.6961	54.823	249.9	62.9619	56.5996	1
A_23_P119763	ref|NM_022436|ens|ENST00000409962|ens|ENST00000486512|ens|ENST00000260645	hs|chr2:44040115-44040056	0	ABCG5	NM_022436	ref|Homo sapiens ATP-binding cassette, sub-family G (WHITE), member 5 (ABCG5), mRNA [NM_022436]	ABCG5	64240	-0.973807	0.509161	0.426826	0.987258	0	129.461	65.9166	48.3315	346.776	76.1222	57.0792	1
A_23_P119763	ref|NM_022436|ens|ENST00000409962|ens|ENST00000486512|ens|ENST00000260645	hs|chr2:44040115-44040056	0	ABCG5	NM_022436	ref|Homo sapiens ATP-binding cassette, sub-family G (WHITE), member 5 (ABCG5), mRNA [NM_022436]	ABCG5	64240	-0.988228	0.504097	0.34261	0.987258	0	119.853	60.4173	52.8379	271.862	63.1068	57.8424	1
A_23_P119763	ref|NM_022436|ens|ENST00000409962|ens|ENST00000486512|ens|ENST00000260645	hs|chr2:44040115-44040056	0	ABCG5	NM_022436	ref|Homo sapiens ATP-binding cassette, sub-family G (WHITE), member 5 (ABCG5), mRNA [NM_022436]	ABCG5	64240	-1.0807	0.472798	0.332405	0.987258	0	146.755	69.3856	61.0744	352.637	73.7958	65.239	1
A_33_P3361112	ref|NM_022437|ens|ENST00000458384|ens|ENST00000272286|gb|FV379008	hs|chr2:44105545-44105604	0	ABCG8	NM_022437	ref|Homo sapiens ATP-binding cassette, sub-family G (WHITE), member 8 (ABCG8), mRNA [NM_022437]	ABCG8	64241	0.0846306	1.06042	0.747897	0.9898	0	35.37	37.5069	38.7213	32.3087	38.783	36.2728	0
A_23_P17242	ref|NM_032604|ens|ENST00000316470|ens|ENST00000448950|ens|ENST00000420647	hs|chr2:27353616-27353675	0	ABHD1	NM_032604	ref|Homo sapiens abhydrolase domain containing 1 (ABHD1), mRNA [NM_032604]	ABHD1	84696	-0.689882	0.619904	0.314813	0.987258	0	107.651	66.7331	65.4564	177.044	58.9859	75.4978	1
A_24_P268662	ref|NM_018394|ens|ENST00000273359|gb|AK002204|gb|AL713726	hs|chr3:111711242-111711301	0	ABHD10	NM_018394	ref|Homo sapiens abhydrolase domain containing 10 (ABHD10), mRNA [NM_018394]	ABHD10	55347	0.0537126	1.03793	0.833019	0.992143	0	32.8905	34.1381	30.3578	35.6345	34.317	33.9602	0
A_23_P8558	ref|NM_148912|ref|NM_148913|ref|NR_026910|ref|NR_026912	hs|chr7:73151670-73151611	0	ABHD11	NM_148912	ref|Homo sapiens abhydrolase domain containing 11 (ABHD11), nuclear gene encoding mitochondrial protein, transcript variant 1, mRNA [NM_148912]	ABHD11	83451	-0.420952	0.746932	0.496103	0.987258	0	322.062	240.558	199.803	519.131	240.843	240.273	1
A_23_P315933	ref|NM_148912|ref|NM_148913|ref|NM_001145364|ref|NR_026910	hs|chr7:73150523-73150464	0	ABHD11	NM_148912	ref|Homo sapiens abhydrolase domain containing 11 (ABHD11), nuclear gene encoding mitochondrial protein, transcript variant 1, mRNA [NM_148912]	ABHD11	83451	-0.516557	0.699038	0.416327	0.987258	0	2664.49	1862.58	1647.62	4308.96	1759.92	1971.24	1
A_33_P3333480	ref|NR_026690|ens|ENST00000427153|gb|BU595969	hs|chr7:73150088-73150147	0	WBSCR26	NR_026690	ref|Homo sapiens Williams Beuren syndrome chromosome region 26 (non-protein coding) (WBSCR26), non-coding RNA [NR_026690]	ABHD11-AS1	171022	-0.653434	0.635765	0.433167	0.987258	0	91.2841	58.0353	47.8282	174.223	50.462	66.7451	1
A_23_P149494	ref|NM_015600|ref|NM_001042472|ens|ENST00000491682|ens|ENST00000481556	hs|chr20:25288665-25288606	0	ABHD12	NM_015600	ref|Homo sapiens abhydrolase domain containing 12 (ABHD12), transcript variant 2, mRNA [NM_015600]	ABHD12	26090	-0.136307	0.909845	0.682957	0.987258	0	978.52	890.302	856.657	1117.72	766.913	1033.54	1
A_33_P3315698	ref|NM_181533|ref|NM_181814|ens|ENST00000382029|ens|ENST00000337334	hs|chr14:51347229-51347288	0	ABHD12B	NM_181533	ref|Homo sapiens abhydrolase domain containing 12B (ABHD12B), transcript variant 2, mRNA [NM_181533]	ABHD12B	145447	-0.354544	0.782117	0.476099	0.987258	0	61.6379	48.2081	43.3953	87.5494	52.7558	44.0523	0
A_23_P366035	ref|NM_181533|ref|NM_181814|ens|ENST00000337334|ens|ENST00000395752	hs|chr14:51371212-51371271	0	ABHD12B	NM_181533	ref|Homo sapiens abhydrolase domain containing 12B (ABHD12B), transcript variant 2, mRNA [NM_181533]	ABHD12B	145447	-1.24091	0.423106	0.327182	0.987258	0	94.0135	39.7776	34.5034	256.164	40.8262	38.756	1
A_24_P398691	ref|NM_032859|ens|ENST00000375898|gb|BX647428|gb|BC018608	hs|chr13:108886511-108886570	0	ABHD13	NM_032859	ref|Homo sapiens abhydrolase domain containing 13 (ABHD13), mRNA [NM_032859]	ABHD13	84945	0.0597077	1.04225	0.87084	0.994688	0	44.934	46.8327	57.2318	35.2788	48.3413	45.3712	0
A_33_P3386765	ref|NM_015407|ens|ENST00000273596|gb|BC002571|gb|AL050015	hs|chr3:52015151-52015210	0	ABHD14A	NM_015407	ref|Homo sapiens abhydrolase domain containing 14A (ABHD14A), mRNA [NM_015407]	ABHD14A	25864	-0.931779	0.524212	0.16775	0.987258	0	6399.5	3354.69	4038.81	10140	3251.6	3461.05	1
A_33_P3283713	ref|NM_015407|ens|ENST00000273596|gb|AY358201|gb|BC002571	hs|chr3:52015145-52015204	0	ABHD14A	NM_015407	ref|Homo sapiens abhydrolase domain containing 14A (ABHD14A), mRNA [NM_015407]	ABHD14A	25864	-0.941505	0.520689	0.14373	0.987258	0	7466.88	3887.92	4882.91	11418.2	3835.09	3941.48	1
A_23_P155417	ref|NM_032750|ref|NM_001146314|ref|NR_027476|ens|ENST00000361143	hs|chr3:52002959-52002900	0	ABHD14B	NM_032750	ref|Homo sapiens abhydrolase domain containing 14B (ABHD14B), transcript variant 1, mRNA [NM_032750]	ABHD14B	84836	0.180016	1.1329	0.743167	0.9898	0	581.728	659.037	380.697	888.915	697.981	622.266	1
A_33_P3216913	ref|NM_198147|ens|ENST00000307201|gb|AY358212|gb|AK056717	hs|chr17:27888454-27888395	0	ABHD15	NM_198147	ref|Homo sapiens abhydrolase domain containing 15 (ABHD15), mRNA [NM_198147]	ABHD15	116236	0.696275	1.62032	0.235872	0.987258	0	136.197	220.682	200.182	92.6633	192.374	253.156	1
A_23_P156697	ref|NM_021160|ref|NM_001177515|ref|NR_033488|ref|NR_033489	hs|chr6:31655629-31655487	0	ABHD16A	NM_021160	ref|Homo sapiens abhydrolase domain containing 16A (ABHD16A), transcript variant 1, mRNA [NM_021160]	ABHD16A	7920	-0.581635	0.668206	0.185408	0.987258	0	470.207	314.195	541.273	408.472	252.184	391.455	1
A_33_P3289461	ref|NM_080622|ens|ENST00000369916|gb|BC031949	hs|chr20:62494280-62494339	0	ABHD16B	NM_080622	ref|Homo sapiens abhydrolase domain containing 16B (ABHD16B), mRNA [NM_080622]	ABHD16B	140701	-0.678235	0.624929	0.416568	0.987258	0	99.1964	61.9907	51.2853	191.866	61.763	62.2193	1
A_23_P395172	ref|NM_007011|ref|NM_152924|ens|ENST00000352732|ens|ENST00000355100	hs|chr15:89744716-89744775	0	ABHD2	NM_007011	ref|Homo sapiens abhydrolase domain containing 2 (ABHD2), transcript variant 1, mRNA [NM_007011]	ABHD2	11057	1.50607	2.84035	0.371203	0.987258	0	202.475	575.1	791.488	51.7963	562.791	587.679	1
A_23_P305759	ref|NM_138340|ens|ENST00000289119|gb|HQ448233|gb|CR627346	hs|chr18:19236897-19236838	0	ABHD3	NM_138340	ref|Homo sapiens abhydrolase domain containing 3 (ABHD3), mRNA [NM_138340]	ABHD3	171586	0.313209	1.24247	0.55817	0.987258	0	137.586	170.946	202.553	93.4562	151.846	192.448	1
A_23_P205519	ref|NM_022060|ens|ENST00000428304|ens|ENST00000418446|ens|ENST00000489928	hs|chr14:23081028-23081087	0	ABHD4	NM_022060	ref|Homo sapiens abhydrolase domain containing 4 (ABHD4), mRNA [NM_022060]	ABHD4	63874	-0.821493	0.565856	0.0497979	0.987258	0	4028.81	2279.73	3870.06	4194.06	2677.33	1941.17	1
A_23_P250294	ref|NM_016006|ens|ENST00000458276|gb|AF151816|gb|BC021958	hs|chr3:43760031-43760090	0	ABHD5	NM_016006	ref|Homo sapiens abhydrolase domain containing 5 (ABHD5), mRNA [NM_016006]	ABHD5	51099	-0.602741	0.658502	0.172245	0.987258	0	4057.04	2671.57	4663.69	3529.3	3325.14	2146.46	1
A_23_P211850	ref|NM_020676|ens|ENST00000478253|ens|ENST00000295962|gb|AK055828	hs|chr3:58280291-58280350	0	ABHD6	NM_020676	ref|Homo sapiens abhydrolase domain containing 6 (ABHD6), mRNA [NM_020676]	ABHD6	57406	-0.277488	0.825027	0.399611	0.987258	0	1031.6	851.097	1173.99	906.482	754.392	960.2	1
A_33_P3302165	ref|NM_024527|ens|ENST00000247706|gb|AK021805|gb|CR603220	hs|chr19:17403000-17402941	0	ABHD8	NM_024527	ref|Homo sapiens abhydrolase domain containing 8 (ABHD8), mRNA [NM_024527]	ABHD8	79575	-0.47481	0.719561	0.202734	0.987258	0	6088.46	4381.02	5273.6	7029.22	5015.54	3826.77	1
A_33_P3622802	ref|NM_005470|ref|NM_001178116|ref|NM_001012750|ref|NM_001178119	hs|chr10:27036506-27036447	0	ABI1	NM_005470	ref|Homo sapiens abl-interactor 1 (ABI1), transcript variant 1, mRNA [NM_005470]	ABI1	10006	1.16325	2.23961	0.19884	0.987258	0	247.411	554.103	476.868	128.363	515.227	595.912	1
A_24_P933418	ref|NM_005759|ens|ENST00000261016|ens|ENST00000261018|ens|ENST00000295851	hs|chr2:204295853-204295912	0	ABI2	NM_005759	ref|Homo sapiens abl-interactor 2 (ABI2), mRNA [NM_005759]	ABI2	10152	1.54523	2.9185	0.261406	0.987258	0	413.876	1207.9	1199.61	142.791	1275.42	1143.95	1
A_33_P3412603	gb|AK125205	hs|chr2:204193552-204193493	0	AK125205	AK125205	gb|Homo sapiens cDNA FLJ43215 fis, clone FEBRA2021908. [AK125205]	ABI2	10152	-0.177159	0.884443	0.491173	0.987258	0	47.0938	41.6518	48.6366	45.5999	44.062	39.3733	0
A_33_P3226237	gb|AK125205	hs|chr2:204193090-204193031	0	AK125205	AK125205	gb|Homo sapiens cDNA FLJ43215 fis, clone FEBRA2021908. [AK125205]	ABI2	10152	-0.697684	0.616561	0.334571	0.987258	0	6726.98	4147.59	3981.17	11366.6	4864.99	3535.99	1
A_23_P141429	ref|NM_016428|ref|NM_001135186|ens|ENST00000419580|ens|ENST00000225941	hs|chr17:47300191-47300250	0	ABI3	NM_016428	ref|Homo sapiens ABI family, member 3 (ABI3), transcript variant 1, mRNA [NM_016428]	ABI3	51225	-0.26699	0.831052	0.427954	0.987258	0	109.461	90.968	93.698	127.877	101.232	81.7445	1
A_23_P218858	ref|NM_015429|ens|ENST00000429331|ens|ENST00000433275|ens|ENST00000383692	hs|chr3:100468645-100468586	0	ABI3BP	NM_015429	ref|Homo sapiens ABI family, member 3 (NESH) binding protein (ABI3BP), mRNA [NM_015429]	ABI3BP	25890	1.86189	3.63484	0.247621	0.987258	0	187.654	682.092	347.853	101.232	231.181	2012.49	1
A_33_P3411975	ref|NM_015429|ens|ENST00000398284|ens|ENST00000475896|ens|ENST00000495063	hs|chr3:100585783-100585724	0	ABI3BP	NM_015429	ref|Homo sapiens ABI family, member 3 (NESH) binding protein (ABI3BP), mRNA [NM_015429]	ABI3BP	25890	1.01428	2.0199	0.391362	0.987258	0	95.707	193.319	123.53	74.1508	77.2764	483.616	1
A_33_P3411980	ens|ENST00000495063|gb|AL833204	hs|chr3:100535562-100535503	0	ENST00000495063	ENST00000495063	gb|Homo sapiens mRNA; cDNA DKFZp667H216 (from clone DKFZp667H216). [AL833204]	ABI3BP	25890	0.908219	1.87673	0.0933228	0.987258	0	42.2234	79.2418	41.9729	42.4754	57.9664	108.326	1
A_23_P60180	ref|NM_005157|ref|NM_007313|ens|ENST00000318560|gb|CR614023	hs|chr9:133762589-133762648	0	ABL1	NM_005157	ref|Homo sapiens c-abl oncogene 1, non-receptor tyrosine kinase (ABL1), transcript variant a, mRNA [NM_005157]	ABL1	25	0.87334	1.8319	0.108482	0.987258	0	2175.82	3985.89	2953.39	1602.97	4445.91	3573.46	1
A_24_P282416	ref|NM_007313|ens|ENST00000393293|ens|ENST00000372348|ens|ENST00000438426	hs|chr9:133589580-133589639	0	ABL1	NM_007313	ref|Homo sapiens c-abl oncogene 1, non-receptor tyrosine kinase (ABL1), transcript variant b, mRNA [NM_007313]	ABL1	25	0.0744066	1.05293	0.775809	0.989802	0	111.476	117.376	112.027	110.927	128.828	106.942	1
A_33_P3413671	ref|NM_007314|ref|NM_001168236|ref|NM_005158|ref|NM_001168237	hs|chr1:179073242-179073183	0	ABL2	NM_007314	ref|Homo sapiens v-abl Abelson murine leukemia viral oncogene homolog 2 (ABL2), transcript variant b, mRNA [NM_007314]	ABL2	27	1.04498	2.06334	0.447884	0.987258	0	182.325	376.199	540.706	61.4799	277.503	509.998	1
A_32_P139894	ref|NM_007314|ref|NM_001168236|ref|NM_005158|ref|NM_001168237	hs|chr1:179068871-179068812	0	ABL2	NM_007314	ref|Homo sapiens v-abl Abelson murine leukemia viral oncogene homolog 2 (ABL2), transcript variant b, mRNA [NM_007314]	ABL2	27	0.724592	1.65243	0.550459	0.987258	0	1128.24	1864.34	3017.31	421.875	1494.96	2325	1
A_33_P3413667	ref|NM_001136001|ens|ENST00000392043|gb|AK311045	hs|chr1:179079775-179079716	0	ABL2	NM_001136001	ref|Homo sapiens v-abl Abelson murine leukemia viral oncogene homolog 2 (ABL2), transcript variant e, mRNA [NM_001136001]	ABL2	27	0.0702361	1.04989	0.863637	0.994566	0	44.1772	46.3812	57.856	33.7325	41.7198	51.5634	0
A_33_P3219601	ref|NM_007314|ref|NM_001168236|ref|NM_005158|ref|NM_001168237	hs|chr1:179076912-179076853	0	ABL2	NM_007314	ref|Homo sapiens v-abl Abelson murine leukemia viral oncogene homolog 2 (ABL2), transcript variant b, mRNA [NM_007314]	ABL2	27	-0.232154	0.851363	0.547694	0.987258	0	529.908	451.144	643.721	436.218	383.097	531.278	1
A_23_P202520	ref|NM_001003408|ref|NM_001003407|ref|NM_002313|ref|NM_006720	hs|chr10:116190950-116190891	0	ABLIM1	NM_001003408	ref|Homo sapiens actin binding LIM protein 1 (ABLIM1), transcript variant 3, mRNA [NM_001003408]	ABLIM1	3983	2.21769	4.65147	0.00663368	0.987258	0	303.604	1412.2	411.706	223.886	1367.81	1458.03	1
A_33_P3388651	ref|NM_001003408|ref|NM_001003407|ref|NM_002313|ref|NM_006720	hs|chr10:116196035-116195976	0	ABLIM1	NM_001003408	ref|Homo sapiens actin binding LIM protein 1 (ABLIM1), transcript variant 3, mRNA [NM_001003408]	ABLIM1	3983	1.81816	3.52631	0.0205439	0.987258	0	51.1943	180.527	74.685	35.0922	175.695	185.493	1
A_33_P3388646	ref|NM_001003408|ref|NM_001003407|ref|NM_002313|ref|NM_006720	hs|chr10:116194270-116194211	0	ABLIM1	NM_001003408	ref|Homo sapiens actin binding LIM protein 1 (ABLIM1), transcript variant 3, mRNA [NM_001003408]	ABLIM1	3983	0.450324	1.36635	0.132294	0.987258	0	49.1908	67.2117	52.2039	46.3516	65.06	69.4346	0
A_23_P255672	ref|NM_032432|ref|NM_001130083|ref|NM_001130084|ref|NM_001130085	hs|chr4:7967135-7967076	0	ABLIM2	NM_032432	ref|Homo sapiens actin binding LIM protein family, member 2 (ABLIM2), transcript variant 6, mRNA [NM_032432]	ABLIM2	84448	-0.185942	0.879075	0.612061	0.987258	0	49.5702	43.5759	62.4856	39.3243	41.6608	45.5791	0
A_33_P3381666	ref|NM_001130088|ens|ENST00000428004|gb|BC067214	hs|chr4:8008822-8008763	0	ABLIM2	NM_001130088	ref|Homo sapiens actin binding LIM protein family, member 2 (ABLIM2), transcript variant 7, mRNA [NM_001130088]	ABLIM2	84448	-0.220999	0.857971	0.435765	0.987258	0	43.7351	37.5234	48.2191	39.668	39.8133	35.3653	0
A_33_P3337134	ref|NM_001130083|ref|NM_001130084|ref|NM_001130085|ref|NM_001130086	hs|chr4:7968094-7968035	0	ABLIM2	NM_001130083	ref|Homo sapiens actin binding LIM protein family, member 2 (ABLIM2), transcript variant 1, mRNA [NM_001130083]	ABLIM2	84448	-0.901284	0.53541	0.325581	0.987258	0	101.487	54.3372	49.835	206.675	55.2225	53.4662	1
A_23_P256205	ref|NM_014945|ens|ENST00000506113|ens|ENST00000309868|ens|ENST00000515171	hs|chr5:148639682-148639741	0	ABLIM3	NM_014945	ref|Homo sapiens actin binding LIM protein family, member 3 (ABLIM3), mRNA [NM_014945]	ABLIM3	22885	0.0674174	1.04784	0.873832	0.995156	0	4364.71	4573.51	5773.67	3299.58	5182.98	4035.71	1
A_24_P123408	ref|NM_014945|ens|ENST00000356541|ens|ENST00000517451|ens|ENST00000504238	hs|chr5:148626089-148627383	0	ABLIM3	NM_014945	ref|Homo sapiens actin binding LIM protein family, member 3 (ABLIM3), mRNA [NM_014945]	ABLIM3	22885	-0.00216698	0.998499	0.995621	0.999959	0	612.493	611.574	756.081	496.174	730.552	511.972	1
A_33_P3266550	ref|NM_020469|ens|ENST00000319878|gb|U15197	hs|chr9:136130807-136130748	0	ABO	NM_020469	ref|Homo sapiens ABO blood group (transferase A, alpha 1-3-N-acetylgalactosaminyltransferase; transferase B, alpha 1-3-galactosyltransferase) (ABO), mRNA [NM_020469]	ABO	28	-0.0638102	0.956734	0.795974	0.990177	0	55.6037	53.1979	53.2758	58.0333	55.2562	51.2164	0
A_23_P59452	ref|NM_001091|ens|ENST00000388969|ens|ENST00000437714|ens|ENST00000416793	hs|chr7:150555060-150555119	0	ABP1	NM_001091	ref|Homo sapiens amiloride binding protein 1 (amine oxidase (copper-containing)) (ABP1), mRNA [NM_001091]	ABP1	26	-0.0489324	0.966651	0.891495	0.996482	0	59.2421	57.2665	47.2847	74.2234	53.6975	61.0727	0
A_23_P503182	ref|NM_021962|ref|NM_001159746|ref|NM_001092|ens|ENST00000291107	hs|chr17:906950-906891	0	ABR	NM_021962	ref|Homo sapiens active BCR-related gene (ABR), transcript variant 1, mRNA [NM_021962]	ABR	29	0.239437	1.18053	0.771529	0.989802	0	6693.26	7901.61	13021.9	3440.34	6755.27	9242.47	1
A_33_P3372297	ref|NM_001159746|ref|NM_021962|ref|NM_001092|ens|ENST00000382259	hs|chr17:914102-914043	0	ABR	NM_001159746	ref|Homo sapiens active BCR-related gene (ABR), transcript variant 3, mRNA [NM_001159746]	ABR	29	0.0631604	1.04475	0.906041	0.996521	0	173.214	180.965	256.313	117.056	156.532	209.212	1
A_33_P3368208	ref|NM_139166|ens|ENST00000311955|gb|AK056976|gb|AL833422	hs|chr8:107771790-107771731	0	ABRA	NM_139166	ref|Homo sapiens actin-binding Rho activating protein (ABRA), mRNA [NM_139166]	ABRA	137735	-0.0990047	0.933677	0.696347	0.987258	0	36.2271	33.8244	33.771	38.8618	34.4186	33.2404	0
A_23_P30784	ref|NM_013375|ens|ENST00000274849	hs|chr6:26600159-26600218	0	ABT1	NM_013375	ref|Homo sapiens activator of basal transcription 1 (ABT1), mRNA [NM_013375]	ABT1	29777	-0.277911	0.824784	0.325085	0.987258	0	497.419	410.263	467.415	529.348	380.611	442.225	1
A_33_P3358295	ref|NM_172027|ref|NR_033428|ref|NR_033429|ens|ENST00000361019	hs|chr3:127399373-127399432	0	ABTB1	NM_172027	ref|Homo sapiens ankyrin repeat and BTB (POZ) domain containing 1 (ABTB1), transcript variant 2, mRNA [NM_172027]	ABTB1	80325	-0.567206	0.674923	0.249728	0.987258	0	1168.2	788.444	910.255	1499.24	974.22	638.094	1
A_33_P3297444	ref|NM_172027|ref|NR_033428|ref|NR_033429|ens|ENST00000464431	hs|chr3:127399692-127399751	0	ABTB1	NM_172027	ref|Homo sapiens ankyrin repeat and BTB (POZ) domain containing 1 (ABTB1), transcript variant 2, mRNA [NM_172027]	ABTB1	80325	-0.570012	0.673611	0.21856	0.987258	0	5482.46	3693.05	5004.53	6006.03	4876.64	2796.72	1
A_23_P356616	ref|NM_145804|ens|ENST00000298992|gb|AK095632|gb|AK091560	hs|chr11:34172801-34172742	0	ABTB2	NM_145804	ref|Homo sapiens ankyrin repeat and BTB (POZ) domain containing 2 (ABTB2), mRNA [NM_145804]	ABTB2	25841	-0.584933	0.66668	0.371566	0.987258	0	1544.91	1029.96	2183.93	1092.87	723.264	1466.71	1
A_23_P69339	ref|NM_001607|ref|NM_001130410|ref|NR_024024|ens|ENST00000480865	hs|chr3:38164415-38164356	0	ACAA1	NM_001607	ref|Homo sapiens acetyl-CoA acyltransferase 1 (ACAA1), nuclear gene encoding mitochondrial protein, transcript variant 1, mRNA [NM_001607]	ACAA1	30	-0.485651	0.714175	0.10455	0.987258	0	5669.82	4049.24	5908.64	5440.66	4059.71	4038.81	1
A_23_P89799	ref|NM_006111|ens|ENST00000398549|ens|ENST00000285093|gb|CR599578	hs|chr18:47309991-47309932	0	ACAA2	NM_006111	ref|Homo sapiens acetyl-CoA acyltransferase 2 (ACAA2), nuclear gene encoding mitochondrial protein, mRNA [NM_006111]	ACAA2	10449	-0.16222	0.893649	0.692612	0.987258	0	3222.79	2880.04	2608.44	3981.84	2372.1	3496.76	1
A_33_P3334225	ref|NM_198839|ref|NM_198834|ref|NM_198838|ref|NM_198837	hs|chr17:35441992-35441933	0	ACACA	NM_198839	ref|Homo sapiens acetyl-CoA carboxylase alpha (ACACA), transcript variant 2, mRNA [NM_198839]	ACACA	31	1.20772	2.30972	0.1262	0.987258	0	1108.05	2559.28	1755.48	699.39	1964.12	3334.78	1
A_32_P215318	ref|NM_198839|ref|NM_198834|ref|NM_198836|ens|ENST00000456561	hs|chr17:35687296-35687237	0	ACACA	NM_198839	ref|Homo sapiens acetyl-CoA carboxylase alpha (ACACA), transcript variant 2, mRNA [NM_198839]	ACACA	31	0.151017	1.11035	0.6975	0.987258	0	146.467	162.63	112.625	190.477	159.036	166.304	1
A_33_P3334220	ref|NM_001093|ens|ENST00000377848|ens|ENST00000377854|gb|CR626281	hs|chr12:109705969-109706028	0	ACACB	NM_001093	ref|Homo sapiens acetyl-CoA carboxylase beta (ACACB), mRNA [NM_001093]	ACACB	32	0.784493	1.72249	0.218732	0.987258	0	111.25	191.627	169.368	73.075	223.568	164.249	1
A_23_P87791	ref|NM_001093|ens|ENST00000338432|ens|ENST00000377848|ens|ENST00000377854	hs|chr12:109703078-109703245	0	ACACB	NM_001093	ref|Homo sapiens acetyl-CoA carboxylase beta (ACACB), mRNA [NM_001093]	ACACB	32	0.270881	1.20654	0.389905	0.987258	0	40.8442	49.2804	46.2199	36.0937	54.2851	44.737	0
A_33_P3255329	ens|ENST00000390027|gb|AK302469|gb|BC028417	hs|chr12:109697893-109697952	0	ENST00000390027	ENST00000390027	ens|acetyl-CoA carboxylase beta [Source:HGNC Symbol;Acc:85] [ENST00000390027]	ACACB	32	0.0118412	1.00824	0.961159	0.997354	0	40.904	41.2411	42.0365	39.802	42.9392	39.6102	0
A_23_P25348	ref|NM_025247|ref|NM_001136538|ens|ENST00000392636|ens|ENST00000413681	hs|chr12:112185137-112186127	0	ACAD10	NM_025247	ref|Homo sapiens acyl-CoA dehydrogenase family, member 10 (ACAD10), transcript variant 2, mRNA [NM_025247]	ACAD10	80724	0.483524	1.39815	0.336717	0.987258	0	89.2434	124.776	123.401	64.5409	143.188	108.732	1
A_24_P227450	ref|NM_025247|ref|NM_001136538|ens|ENST00000512792|ens|ENST00000508303	hs|chr12:112193489-112193548	0	ACAD10	NM_025247	ref|Homo sapiens acyl-CoA dehydrogenase family, member 10 (ACAD10), transcript variant 2, mRNA [NM_025247]	ACAD10	80724	-1.28455	0.410499	0.353309	0.987258	0	1993.51	818.334	669.042	5939.95	991.159	675.644	1
A_23_P212497	ref|NM_032169|ens|ENST00000485198|ens|ENST00000264990|ens|ENST00000393156	hs|chr3:132277719-132277660	0	ACAD11	NM_032169	ref|Homo sapiens acyl-CoA dehydrogenase family, member 11 (ACAD11), mRNA [NM_032169]	ACAD11	84129	-0.233904	0.850331	0.700873	0.987258	0	469.747	399.44	402.147	548.709	630.766	252.95	1
A_23_P47426	ref|NM_014384|ens|ENST00000281182|ens|ENST00000374752|gb|AK124235	hs|chr11:134134935-134134994	0	ACAD8	NM_014384	ref|Homo sapiens acyl-CoA dehydrogenase family, member 8 (ACAD8), nuclear gene encoding mitochondrial protein, mRNA [NM_014384]	ACAD8	27034	-0.183971	0.880277	0.57288	0.987258	0	225.91	198.863	190.601	267.76	214.306	184.533	1
A_23_P132405	ref|NM_014049|ref|NR_033426|ens|ENST00000511325|ens|ENST00000511526	hs|chr3:128631840-128631899	0	ACAD9	NM_014049	ref|Homo sapiens acyl-CoA dehydrogenase family, member 9 (ACAD9), nuclear gene encoding mitochondrial protein, transcript variant 1, mRNA [NM_014049]	ACAD9	28976	-0.00184955	0.998719	0.993894	0.999959	0	5251.32	5244.59	5295.6	5207.41	5470.47	5028.04	1
A_24_P191656	ref|NM_014049|ref|NR_033426|ens|ENST00000406840|ens|ENST00000511227	hs|chr3:128629616-128631368	0	ACAD9	NM_014049	ref|Homo sapiens acyl-CoA dehydrogenase family, member 9 (ACAD9), nuclear gene encoding mitochondrial protein, transcript variant 1, mRNA [NM_014049]	ACAD9	28976	-0.211896	0.863402	0.487701	0.987258	0	656.352	566.695	566.433	760.545	588.947	545.284	1
A_33_P3303717	ref|NM_001608|ens|ENST00000233710|gb|M74096|gb|BC039063	hs|chr2:211052889-211052830	0	ACADL	NM_001608	ref|Homo sapiens acyl-CoA dehydrogenase, long chain (ACADL), nuclear gene encoding mitochondrial protein, mRNA [NM_001608]	ACADL	33	0.00677911	1.00471	0.977514	0.999104	0	37.7844	37.9624	38.4473	37.1329	36.7157	39.2513	0
A_23_P96761	ref|NM_000016|ref|NM_001127328|ens|ENST00000420607|ens|ENST00000370841	hs|chr1:76227040-76228420	0	ACADM	NM_000016	ref|Homo sapiens acyl-CoA dehydrogenase, C-4 to C-12 straight chain (ACADM), nuclear gene encoding mitochondrial protein, transcript variant 1, mRNA [NM_000016]	ACADM	34	0.267645	1.20384	0.352095	0.987258	0	743.343	894.867	823.645	670.871	857.593	933.762	1
A_23_P65022	ref|NM_000017|ens|ENST00000242592|ens|ENST00000411593|gb|AB527081	hs|chr12:121176685-121176968	0	ACADS	NM_000017	ref|Homo sapiens acyl-CoA dehydrogenase, C-2 to C-3 short chain (ACADS), nuclear gene encoding mitochondrial protein, mRNA [NM_000017]	ACADS	35	-0.331306	0.794816	0.311059	0.987258	0	162.5	129.157	138.045	191.286	129.45	128.865	1
A_33_P3248992	ref|NM_001609|ens|ENST00000358776|gb|AL831821|gb|BC045723	hs|chr10:124817580-124817639	0	ACADSB	NM_001609	ref|Homo sapiens acyl-Coenzyme A dehydrogenase, short/branched chain (ACADSB), nuclear gene encoding mitochondrial protein, mRNA [NM_001609]	ACADSB	36	1.1986	2.29517	0.377137	0.987258	0	392.572	901.022	1154.3	133.512	751.726	1079.97	1
A_23_P158570	ref|NM_001609|ens|ENST00000368869|ens|ENST00000358776|gb|AK298638	hs|chr10:124813233-124813292	0	ACADSB	NM_001609	ref|Homo sapiens acyl-Coenzyme A dehydrogenase, short/branched chain (ACADSB), nuclear gene encoding mitochondrial protein, mRNA [NM_001609]	ACADSB	36	0.537276	1.45123	0.317914	0.987258	0	97.6226	141.673	142.533	66.8631	135.236	148.416	1
A_23_P207650	ref|NM_000018|ref|NM_001033859|ens|ENST00000322910|ens|ENST00000350303	hs|chr17:7128439-7128498	0	ACADVL	NM_000018	ref|Homo sapiens acyl-CoA dehydrogenase, very long chain (ACADVL), nuclear gene encoding mitochondrial protein, transcript variant 1, mRNA [NM_000018]	ACADVL	37	-0.0334359	0.977091	0.913405	0.996752	0	18505	18081.1	15793.4	21682.2	19271.8	16963.9	1
A_23_P307310	ref|NM_013227|ref|NM_001135|ens|ENST00000439576|ens|ENST00000352105	hs|chr15:89417771-89417830	0	ACAN	NM_013227	ref|Homo sapiens aggrecan (ACAN), transcript variant 2, mRNA [NM_013227]	ACAN	176	0.901062	1.86744	0.486132	0.987258	0	190.004	354.822	86.4011	417.838	173.011	727.692	1
A_33_P3500167	ref|NM_001135|ref|NM_013227|ens|ENST00000338824|ens|ENST00000268134	hs|chr15:89346980-89347039	0	ACAN	NM_001135	ref|Homo sapiens aggrecan (ACAN), transcript variant 1, mRNA [NM_001135]	ACAN	176	-0.0624566	0.957632	0.806599	0.991106	0	54.1713	51.8762	51.2995	57.2038	55.0373	48.8966	0
A_23_P107336	ref|NM_014716|ens|ENST00000158762|gb|BT009788|gb|AB383727	hs|chr17:7251251-7251310	0	ACAP1	NM_014716	ref|Homo sapiens ArfGAP with coiled-coil, ankyrin repeat and PH domains 1 (ACAP1), mRNA [NM_014716]	ACAP1	9744	-0.0304587	0.979109	0.921179	0.99697	0	47.1622	46.1769	39.7973	55.8901	45.1253	47.2531	0
A_24_P942002	ref|NM_012287|ens|ENST00000326793|gb|D26069|gb|BC060767	hs|chr3:194996507-194996448	0	ACAP2	NM_012287	ref|Homo sapiens ArfGAP with coiled-coil, ankyrin repeat and PH domains 2 (ACAP2), mRNA [NM_012287]	ACAP2	23527	1.50863	2.84539	0.312589	0.987258	0	284.911	810.684	924.811	87.7742	918.17	715.781	1
A_33_P3398564	ref|NM_030649|ens|ENST00000467278|ens|ENST00000492936|ens|ENST00000353662	hs|chr1:1228309-1228250	0	ACAP3	NM_030649	ref|Homo sapiens ArfGAP with coiled-coil, ankyrin repeat and PH domains 3 (ACAP3), mRNA [NM_030649]	ACAP3	116983	0.192875	1.14304	0.597073	0.987258	0	3526.11	4030.48	4282.94	2903.01	4583.53	3544.15	1
A_33_P3230290	ref|NM_030649|ens|ENST00000492936|ens|ENST00000353662|gb|AB051503	hs|chr1:1227895-1227836	0	ACAP3	NM_030649	ref|Homo sapiens ArfGAP with coiled-coil, ankyrin repeat and PH domains 3 (ACAP3), mRNA [NM_030649]	ACAP3	116983	-0.646505	0.638826	0.604362	0.987258	0	10019.3	6400.62	3605.89	27839.8	7969.16	5140.81	1
A_23_P24515	ref|NM_000019|ens|ENST00000265838|gb|AK312574|gb|AB590491	hs|chr11:108018009-108018068	0	ACAT1	NM_000019	ref|Homo sapiens acetyl-CoA acetyltransferase 1 (ACAT1), nuclear gene encoding mitochondrial protein, mRNA [NM_000019]	ACAT1	38	0.312821	1.24213	0.275816	0.987258	0	3792.07	4710.26	3599.38	3995.08	4341.89	5109.89	1
A_33_P3253975	ref|NM_000019|ens|ENST00000265838|gb|AK312574|gb|AB590491	hs|chr11:108012358-108012417	0	ACAT1	NM_000019	ref|Homo sapiens acetyl-CoA acetyltransferase 1 (ACAT1), nuclear gene encoding mitochondrial protein, mRNA [NM_000019]	ACAT1	38	0.173663	1.12792	0.564027	0.987258	0	635.791	717.121	554.53	728.961	672.304	764.925	1
A_24_P203678	ref|NM_000019|ens|ENST00000299355|ens|ENST00000265838|gb|AK312574	hs|chr11:108005883-108005942	0	ACAT1	NM_000019	ref|Homo sapiens acetyl-CoA acetyltransferase 1 (ACAT1), nuclear gene encoding mitochondrial protein, mRNA [NM_000019]	ACAT1	38	0.0927878	1.06643	0.787597	0.989802	0	588.652	627.756	480.481	721.177	583.445	675.431	1
A_23_P31135	ref|NM_005891|ens|ENST00000472052|ens|ENST00000367048|gb|BC000408	hs|chr6:160199814-160199873	0	ACAT2	NM_005891	ref|Homo sapiens acetyl-CoA acetyltransferase 2 (ACAT2), mRNA [NM_005891]	ACAT2	39	-0.0456195	0.968874	0.927306	0.99697	0	2569.6	2489.62	1760.33	3750.92	2334.28	2655.29	1
A_24_P171182	ref|NM_022735|ens|ENST00000366812|gb|CR590509|gb|AF020762	hs|chr1:226333332-226333273	0	ACBD3	NM_022735	ref|Homo sapiens acyl-CoA binding domain containing 3 (ACBD3), mRNA [NM_022735]	ACBD3	64746	1.21936	2.32843	0.0789203	0.987258	0	456.839	1063.72	695.483	300.082	1031.9	1096.51	1
A_23_P107166	ref|NM_024722|ref|NM_001135704|ref|NM_001135706|ref|NM_001135705	hs|chr17:43220926-43220985	0	ACBD4	NM_024722	ref|Homo sapiens acyl-CoA binding domain containing 4 (ACBD4), transcript variant 2, mRNA [NM_024722]	ACBD4	79777	-0.49573	0.709203	0.347653	0.987258	0	182.075	129.128	155.827	212.744	181.94	91.6456	1
A_24_P366122	ref|NM_024722|ref|NM_001135707|ref|NM_001135705|ref|NM_001135704	hs|chr17:43213872-43213931	0	ACBD4	NM_024722	ref|Homo sapiens acyl-CoA binding domain containing 4 (ACBD4), transcript variant 2, mRNA [NM_024722]	ACBD4	79777	-1.11044	0.463151	0.359015	0.987258	0	488.644	226.316	186.462	1280.55	243.396	210.434	1
A_23_P97795	ref|NM_145698|ref|NM_001042473|ref|NR_024150|ens|ENST00000476758	hs|chr10:27493451-27493392	0	ACBD5	NM_145698	ref|Homo sapiens acyl-CoA binding domain containing 5 (ACBD5), transcript variant 1, mRNA [NM_145698]	ACBD5	91452	0.5375	1.45146	0.401569	0.987258	0	798.665	1159.23	1297.93	491.449	1120.29	1199.52	1
A_24_P175563	ref|NM_145698|ref|NM_001042473|ref|NR_024150|ens|ENST00000396271	hs|chr10:27484212-27484153	0	ACBD5	NM_145698	ref|Homo sapiens acyl-CoA binding domain containing 5 (ACBD5), transcript variant 1, mRNA [NM_145698]	ACBD5	91452	-0.325906	0.797797	0.251207	0.987258	0	35.9157	28.6534	34.2578	37.6538	26.7019	30.7475	0
A_23_P52127	ref|NM_032360|ens|ENST00000367595|ens|ENST00000496993|ens|ENST00000475338	hs|chr1:180257526-180257467	0	ACBD6	NM_032360	ref|Homo sapiens acyl-CoA binding domain containing 6 (ACBD6), mRNA [NM_032360]	ACBD6	84320	-0.0122612	0.991537	0.969149	0.998192	0	8424.64	8353.34	8496.88	8353.01	10037.9	6951.48	1
A_23_P72584	ref|NM_001039844|ref|NM_138348|ref|NM_001177800|ref|NM_004797	hs|chr10:15118665-15118724	0	ACBD7	NM_001039844	ref|Homo sapiens acyl-CoA binding domain containing 7 (ACBD7), mRNA [NM_001039844]	ACBD7	414149	-1.26584	0.415859	0.394221	0.987258	0	1276.68	530.92	389.238	4187.46	654.567	430.63	1
A_32_P159612	ref|NM_183377|ref|NM_001094|ens|ENST00000225823|gb|AK127748	hs|chr17:31340342-31340283	0	ACCN1	NM_183377	ref|Homo sapiens amiloride-sensitive cation channel 1, neuronal (ACCN1), transcript variant 1, mRNA [NM_183377]	ACCN1	40	-0.244551	0.844078	0.635848	0.987258	0	126.746	106.984	85.951	186.904	112.346	101.877	1
A_23_P204751	ref|NM_020039|ref|NM_001095|ens|ENST00000228468|ens|ENST00000453327	hs|chr12:50477278-50477337	0	ACCN2	NM_020039	ref|Homo sapiens amiloride-sensitive cation channel 2, neuronal (ACCN2), transcript variant 1, mRNA [NM_020039]	ACCN2	41	1.34972	2.54863	0.225106	0.987258	0	315.943	805.222	139.62	714.94	668.052	970.556	1
A_23_P93658	ref|NM_020322|ref|NM_004769|ref|NM_020321|ens|ENST00000357922	hs|chr7:150748928-150748987	0	ACCN3	NM_020322	ref|Homo sapiens amiloride-sensitive cation channel 3 (ACCN3), transcript variant 3, mRNA [NM_020322]	ACCN3	9311	-0.728197	0.603658	0.439185	0.987258	0	118.395	71.4703	56.3991	248.541	61.8554	82.5798	1
A_33_P3250730	ref|NM_018674|ref|NM_182847|ens|ENST00000358078|ens|ENST00000347842	hs|chr2:220403427-220403486	0	ACCN4	NM_018674	ref|Homo sapiens amiloride-sensitive cation channel 4, pituitary (ACCN4), transcript variant 1, mRNA [NM_018674]	ACCN4	55515	-1.14576	0.451951	0.245526	0.987258	0	1939.95	876.763	944.45	3984.76	1061.32	724.299	1
A_23_P258433	ref|NM_017419|ens|ENST00000264432|gb|AB528059|gb|BC140356	hs|chr4:156751195-156751136	0	ACCN5	NM_017419	ref|Homo sapiens amiloride-sensitive cation channel 5, intestinal (ACCN5), mRNA [NM_017419]	ACCN5	51802	-0.0191195	0.986835	0.938936	0.99697	0	41.7713	41.2214	40.5375	43.0427	43.8619	38.7398	0
A_23_P24586	ref|NM_032592|ref|NM_001127219|ens|ENST00000263776|ens|ENST00000432284	hs|chr11:44105056-44105115	0	ACCS	NM_032592	ref|Homo sapiens 1-aminocyclopropane-1-carboxylate synthase homolog (Arabidopsis)(non-functional) (ACCS), transcript variant 1, mRNA [NM_032592]	ACCS	84680	-0.499798	0.707206	0.222827	0.987258	0	816.126	577.169	653.451	1019.3	634.137	525.318	1
A_33_P3255924	ref|NM_001031854|ens|ENST00000378832|gb|BC144554|gb|AB231734	hs|chr11:44080135-44080194	0	ACCSL	NM_001031854	ref|Homo sapiens 1-aminocyclopropane-1-carboxylate synthase homolog (Arabidopsis)(non-functional)-like (ACCSL), mRNA [NM_001031854]	ACCSL	390110	0.142407	1.10374	0.595267	0.987258	0	42.2113	46.5905	46.4494	38.3598	47.7277	45.4804	0
A_33_P3359071	ref|NM_001082486|ref|NM_022914|ref|NM_001082487|gb|CR615919	hs|chr16:67691487-67691428	0	ACD	NM_001082486	ref|Homo sapiens adrenocortical dysplasia homolog (mouse) (ACD), transcript variant 1, mRNA [NM_001082486]	ACD	65057	-0.361722	0.778235	0.4967	0.987258	0	4390.63	3416.94	3009.53	6405.53	3863.93	3021.66	1
A_33_P3229288	ref|NM_000789|ref|NM_152830|ref|NM_001178057|ens|ENST00000413513	hs|chr17:61574915-61574974	0	ACE	NM_000789	ref|Homo sapiens angiotensin I converting enzyme (peptidyl-dipeptidase A) 1 (ACE), transcript variant 1, mRNA [NM_000789]	ACE	1636	-0.568261	0.674429	0.541708	0.987258	0	314.641	212.203	147.164	672.714	221.94	202.894	1
A_23_P252981	ref|NM_021804|ens|ENST00000471548|ens|ENST00000427411|ens|ENST00000252519	hs|chrX:15579251-15579192	0	ACE2	NM_021804	ref|Homo sapiens angiotensin I converting enzyme (peptidyl-dipeptidase A) 2 (ACE2), mRNA [NM_021804]	ACE2	59272	0.199599	1.14838	0.623454	0.987258	0	48.3578	55.5331	42.4213	55.1251	71.1355	43.3528	0
A_23_P38952	ref|NM_133492|ens|ENST00000301452|gb|AF347024|gb|BC112122	hs|chr19:6312480-6312421	0	ACER1	NM_133492	ref|Homo sapiens alkaline ceramidase 1 (ACER1), mRNA [NM_133492]	ACER1	125981	-1.20431	0.433976	0.373432	0.987258	0	286.547	124.354	96.54	850.517	130.87	118.163	1
A_33_P3788618	ref|NM_001010887|ens|ENST00000340967|gb|BC092487|gb|AK123581	hs|chr9:19451559-19451618	0	ACER2	NM_001010887	ref|Homo sapiens alkaline ceramidase 2 (ACER2), mRNA [NM_001010887]	ACER2	340485	-0.381694	0.767536	0.528969	0.987258	0	119.88	92.0122	75.4769	190.406	85.1305	99.4502	1
A_33_P3413759	ref|NM_001010887|ens|ENST00000380376|ens|ENST00000340967|gb|AY312516	hs|chr9:19424730-19424789	0	ACER2	NM_001010887	ref|Homo sapiens alkaline ceramidase 2 (ACER2), mRNA [NM_001010887]	ACER2	340485	-0.78552	0.580143	0.173847	0.987258	0	111.037	64.4176	75.8195	162.614	65.5826	63.2732	1
A_23_P203665	ref|NM_018367|ens|ENST00000278544|gb|AF214454|gb|AF327353	hs|chr11:76732830-76732889	0	ACER3	NM_018367	ref|Homo sapiens alkaline ceramidase 3 (ACER3), mRNA [NM_018367]	ACER3	55331	0.211599	1.15797	0.53208	0.987258	0	104.306	120.783	111.696	97.4051	100.229	145.553	1
A_24_P60845	ref|NM_000665|ens|ENST00000422451|ens|ENST00000442452|ens|ENST00000357451	hs|chr7:100490066-100490007	0	ACHE	NM_000665	ref|Homo sapiens acetylcholinesterase (ACHE), transcript variant E4-E6, mRNA [NM_000665]	ACHE	43	0.175	1.12896	0.809542	0.991367	0	217.375	245.409	122.123	386.921	284.728	211.519	1
A_23_P14389	ref|NM_014977|ref|NM_001164814|ref|NM_001164815|ref|NM_001164817	hs|chr14:23530338-23528670	0	ACIN1	NM_014977	ref|Homo sapiens apoptotic chromatin condensation inducer 1 (ACIN1), transcript variant 1, mRNA [NM_014977]	ACIN1	22985	0.118173	1.08536	0.662375	0.987258	0	973.454	1056.55	877.512	1079.89	1085.7	1028.18	1
A_33_P3415042	ref|NM_001096|ref|NM_198830|ens|ENST00000393896|ens|ENST00000401700	hs|chr17:40024027-40023968	0	ACLY	NM_001096	ref|Homo sapiens ATP citrate lyase (ACLY), transcript variant 1, mRNA [NM_001096]	ACLY	47	0.818456	1.76352	0.0522304	0.987258	0	2040.76	3598.91	2113.54	1970.48	3042.43	4257.19	1
A_23_P376727	ref|NM_138326|ens|ENST00000283054|ens|ENST00000356140|ens|ENST00000392928	hs|chr2:135630187-135655945	0	ACMSD	NM_138326	ref|Homo sapiens aminocarboxymuconate semialdehyde decarboxylase (ACMSD), mRNA [NM_138326]	ACMSD	130013	-0.103259	0.930928	0.711682	0.987258	0	37.8241	35.2115	34.3673	41.6286	32.5138	38.133	0
A_23_P59528	ref|NM_020186|ens|ENST00000479853|ens|ENST00000432641|gb|AF201933	hs|chr7:96810787-96810846	0	ACN9	NM_020186	ref|Homo sapiens ACN9 homolog (S. cerevisiae) (ACN9), mRNA [NM_020186]	ACN9	57001	-0.170206	0.888716	0.59823	0.987258	0	1287.73	1144.43	1078.5	1537.56	1196.32	1094.79	1
A_23_P9415	ref|NM_002197|ens|ENST00000379921|ens|ENST00000379923|ens|ENST00000309951	hs|chr9:32450545-32450604	0	ACO1	NM_002197	ref|Homo sapiens aconitase 1, soluble (ACO1), mRNA [NM_002197]	ACO1	48	1.22504	2.33762	0.0176849	0.987258	0	3000.36	7013.7	2988.34	3012.43	8433.95	5832.62	1
A_23_P103149	ref|NM_001098|ens|ENST00000445344|ens|ENST00000216254|gb|CR613743	hs|chr22:41924818-41924877	0	ACO2	NM_001098	ref|Homo sapiens aconitase 2, mitochondrial (ACO2), nuclear gene encoding mitochondrial protein, mRNA [NM_001098]	ACO2	50	0.0608039	1.04305	0.799292	0.990294	0	7197.41	7507.24	7342.94	7054.77	7577.66	7437.47	1
A_23_P103149	ref|NM_001098|ens|ENST00000445344|ens|ENST00000216254|gb|CR613743	hs|chr22:41924818-41924877	0	ACO2	NM_001098	ref|Homo sapiens aconitase 2, mitochondrial (ACO2), nuclear gene encoding mitochondrial protein, mRNA [NM_001098]	ACO2	50	0.0534707	1.03776	0.824177	0.991737	0	6748.41	7003.22	6601.97	6898.09	6825.33	7185.74	1
A_23_P103149	ref|NM_001098|ens|ENST00000445344|ens|ENST00000216254|gb|CR613743	hs|chr22:41924818-41924877	0	ACO2	NM_001098	ref|Homo sapiens aconitase 2, mitochondrial (ACO2), nuclear gene encoding mitochondrial protein, mRNA [NM_001098]	ACO2	50	0.0482522	1.03401	0.84594	0.993021	0	6594.55	6818.84	6883.51	6317.73	6505.28	7147.52	1
A_23_P103149	ref|NM_001098|ens|ENST00000445344|ens|ENST00000216254|gb|CR613743	hs|chr22:41924818-41924877	0	ACO2	NM_001098	ref|Homo sapiens aconitase 2, mitochondrial (ACO2), nuclear gene encoding mitochondrial protein, mRNA [NM_001098]	ACO2	50	0.0250714	1.01753	0.919903	0.99697	0	6220.72	6329.77	6002.41	6446.96	5973.67	6707.09	1
A_23_P103149	ref|NM_001098|ens|ENST00000445344|ens|ENST00000216254|gb|CR613743	hs|chr22:41924818-41924877	0	ACO2	NM_001098	ref|Homo sapiens aconitase 2, mitochondrial (ACO2), nuclear gene encoding mitochondrial protein, mRNA [NM_001098]	ACO2	50	0.0227823	1.01592	0.924333	0.99697	0	7561.53	7681.89	7577.66	7545.44	7943.44	7428.95	1
A_23_P103149	ref|NM_001098|ens|ENST00000445344|ens|ENST00000216254|gb|CR613743	hs|chr22:41924818-41924877	0	ACO2	NM_001098	ref|Homo sapiens aconitase 2, mitochondrial (ACO2), nuclear gene encoding mitochondrial protein, mRNA [NM_001098]	ACO2	50	0.00797854	1.00555	0.97351	0.998499	0	7640.83	7683.21	7858.76	7428.95	7862.71	7507.79	1
A_23_P103149	ref|NM_001098|ens|ENST00000445344|ens|ENST00000216254|gb|CR613743	hs|chr22:41924818-41924877	0	ACO2	NM_001098	ref|Homo sapiens aconitase 2, mitochondrial (ACO2), nuclear gene encoding mitochondrial protein, mRNA [NM_001098]	ACO2	50	-0.0126366	0.991279	0.95748	0.997354	0	7210.82	7147.94	7154.15	7267.94	7207.52	7088.85	1
A_23_P103149	ref|NM_001098|ens|ENST00000445344|ens|ENST00000216254|gb|CR613743	hs|chr22:41924818-41924877	0	ACO2	NM_001098	ref|Homo sapiens aconitase 2, mitochondrial (ACO2), nuclear gene encoding mitochondrial protein, mRNA [NM_001098]	ACO2	50	-0.0146265	0.989913	0.951284	0.99697	0	7639.92	7562.85	7881.49	7405.75	7526.39	7599.49	1
A_23_P103149	ref|NM_001098|ens|ENST00000445344|ens|ENST00000216254|gb|CR613743	hs|chr22:41924818-41924877	0	ACO2	NM_001098	ref|Homo sapiens aconitase 2, mitochondrial (ACO2), nuclear gene encoding mitochondrial protein, mRNA [NM_001098]	ACO2	50	-0.0175928	0.98788	0.941333	0.99697	0	7627.17	7534.73	7801.72	7456.53	7674.81	7397.21	1
A_23_P103149	ref|NM_001098|ens|ENST00000445344|ens|ENST00000216254|gb|CR613743	hs|chr22:41924818-41924877	0	ACO2	NM_001098	ref|Homo sapiens aconitase 2, mitochondrial (ACO2), nuclear gene encoding mitochondrial protein, mRNA [NM_001098]	ACO2	50	-0.060098	0.959199	0.809758	0.991367	0	7947.84	7623.56	8457.65	7468.76	7801.72	7449.46	1
A_24_P161036	ref|NM_001037161|ref|NM_006821|ens|ENST00000311148|ens|ENST00000238651	hs|chr14:74010384-74010443	0	ACOT1	NM_001037161	ref|Homo sapiens acyl-CoA thioesterase 1 (ACOT1), mRNA [NM_001037161]	ACOT1	641371	-0.0774635	0.947722	0.847342	0.993021	0	10829.5	10263.3	8799.46	13327.8	8473.62	12431.1	1
A_23_P325726	ref|NM_015547|gb|AF416922|gb|BC093844|gb|BC093846	hs|chr1:55070090-55070795	0	ACOT11	NM_015547	ref|Homo sapiens acyl-CoA thioesterase 11 (ACOT11), transcript variant 1, mRNA [NM_015547]	ACOT11	26027	-1.19265	0.437498	0.374307	0.987258	0	345.496	151.154	118.007	1011.53	169.802	134.554	1
A_23_P417415	ref|NM_147161|ens|ENST00000451902|ens|ENST00000481208|ens|ENST00000343744	hs|chr1:55075674-55075733	0	ACOT11	NM_147161	ref|Homo sapiens acyl-CoA thioesterase 11 (ACOT11), transcript variant 2, mRNA [NM_147161]	ACOT11	26027	-1.62338	0.324574	0.163404	0.987258	0	767.638	249.155	503.88	1169.46	119.931	517.617	1
A_23_P44207	ref|NM_130767|ens|ENST00000506440|ens|ENST00000508234|ens|ENST00000307624	hs|chr5:80626341-80626282	0	ACOT12	NM_130767	ref|Homo sapiens acyl-CoA thioesterase 12 (ACOT12), mRNA [NM_130767]	ACOT12	134526	0.560029	1.4743	0.107726	0.987258	0	49.3685	72.7839	50.0143	48.731	83.1415	63.7166	0
A_23_P31116	ref|NM_018473|ref|NM_001160094|ens|ENST00000476436|ens|ENST00000230048	hs|chr6:24701794-24701853	0	ACOT13	NM_018473	ref|Homo sapiens acyl-CoA thioesterase 13 (ACOT13), transcript variant 1, mRNA [NM_018473]	ACOT13	55856	-0.253876	0.83864	0.628698	0.987258	0	8613.99	7224.04	6096.42	12171.2	8823.23	5914.7	1
A_23_P14515	ref|NM_152331|ens|ENST00000326303|gb|BC117343|gb|BC117341	hs|chr14:74062080-74062139	0	ACOT4	NM_152331	ref|Homo sapiens acyl-CoA thioesterase 4 (ACOT4), mRNA [NM_152331]	ACOT4	122970	-1.15504	0.449054	0.0895052	0.987258	0	292.693	131.435	232.108	369.092	92.5851	186.587	1
A_33_P3352517	ref|NM_001037162|ens|ENST00000381139|gb|DQ082756	hs|chr14:74086523-74086582	0	ACOT6	NM_001037162	ref|Homo sapiens acyl-CoA thioesterase 6 (ACOT6), mRNA [NM_001037162]	ACOT6	641372	0.0347948	1.02441	0.887155	0.996348	0	33.6208	34.4415	32.4889	34.792	32.9969	35.9493	0
A_24_P205589	ref|NM_007274|ref|NM_181864|ref|NM_181865|ref|NM_181866	hs|chr1:6354983-6354924	0	ACOT7	NM_007274	ref|Homo sapiens acyl-CoA thioesterase 7 (ACOT7), transcript variant hBACHa, mRNA [NM_007274]	ACOT7	11332	-0.403489	0.756028	0.593796	0.987258	0	3058.46	2312.28	2516.29	3717.44	1295.56	4126.89	1
A_33_P3352544	ref|NM_005469|ens|ENST00000486165|ens|ENST00000347763|ens|ENST00000488679	hs|chr20:44472981-44472922	0	ACOT8	NM_005469	ref|Homo sapiens acyl-CoA thioesterase 8 (ACOT8), mRNA [NM_005469]	ACOT8	10005	-0.641127	0.641212	0.296055	0.987258	0	1607.38	1030.67	1041.89	2479.79	1140.55	931.378	1
A_23_P125624	ref|NM_001037171|ref|NM_001033583|ens|ENST00000494361|ens|ENST00000379295	hs|chrX:23721956-23721897	0	ACOT9	NM_001037171	ref|Homo sapiens acyl-CoA thioesterase 9 (ACOT9), nuclear gene encoding mitochondrial protein, transcript variant 1, mRNA [NM_001037171]	ACOT9	23597	0.303153	1.23384	0.401903	0.987258	0	7402.59	9133.59	6039.01	9074.06	8506.48	9806.94	1
A_24_P42501	ref|NM_001037171|ref|NM_001033583|ens|ENST00000449612|ens|ENST00000494361	hs|chrX:23740101-23740042	0	ACOT9	NM_001037171	ref|Homo sapiens acyl-CoA thioesterase 9 (ACOT9), nuclear gene encoding mitochondrial protein, transcript variant 1, mRNA [NM_001037171]	ACOT9	23597	0.0120218	1.00837	0.976148	0.998756	0	1350.19	1361.48	1026.58	1775.8	1266.5	1463.6	1
A_33_P3244803	ref|NM_001185039|ref|NM_004035|ref|NM_007292|ens|ENST00000293217	hs|chr17:73937674-73937615	0	ACOX1	NM_001185039	ref|Homo sapiens acyl-CoA oxidase 1, palmitoyl (ACOX1), transcript variant 3, mRNA [NM_001185039]	ACOX1	51	0.886043	1.8481	0.272239	0.987258	0	1271.43	2349.74	2105.42	767.8	1681.33	3283.87	1
A_23_P10182	ref|NM_003500|ens|ENST00000460921|ens|ENST00000302819|ens|ENST00000467738	hs|chr3:58490967-58490908	0	ACOX2	NM_003500	ref|Homo sapiens acyl-CoA oxidase 2, branched chain (ACOX2), mRNA [NM_003500]	ACOX2	8309	-0.83173	0.561855	0.434823	0.987258	0	1261.2	708.61	784.341	2027.97	345.612	1452.87	1
A_23_P10182	ref|NM_003500|ens|ENST00000460921|ens|ENST00000302819|ens|ENST00000467738	hs|chr3:58490967-58490908	0	ACOX2	NM_003500	ref|Homo sapiens acyl-CoA oxidase 2, branched chain (ACOX2), mRNA [NM_003500]	ACOX2	8309	-0.920895	0.528181	0.383477	0.987258	0	1276.25	674.092	840.525	1937.86	324.089	1402.09	1
A_23_P10182	ref|NM_003500|ens|ENST00000460921|ens|ENST00000302819|ens|ENST00000467738	hs|chr3:58490967-58490908	0	ACOX2	NM_003500	ref|Homo sapiens acyl-CoA oxidase 2, branched chain (ACOX2), mRNA [NM_003500]	ACOX2	8309	-0.92382	0.527112	0.353282	0.987258	0	1454.13	766.489	949.071	2227.96	396.987	1479.91	1
A_23_P10182	ref|NM_003500|ens|ENST00000460921|ens|ENST00000302819|ens|ENST00000467738	hs|chr3:58490967-58490908	0	ACOX2	NM_003500	ref|Homo sapiens acyl-CoA oxidase 2, branched chain (ACOX2), mRNA [NM_003500]	ACOX2	8309	-0.924951	0.526698	0.363183	0.987258	0	1374.49	723.941	890.293	2122.02	367.553	1425.89	1
A_23_P10182	ref|NM_003500|ens|ENST00000460921|ens|ENST00000302819|ens|ENST00000467738	hs|chr3:58490967-58490908	0	ACOX2	NM_003500	ref|Homo sapiens acyl-CoA oxidase 2, branched chain (ACOX2), mRNA [NM_003500]	ACOX2	8309	-0.937258	0.522224	0.34714	0.987258	0	1451.19	757.848	922.989	2281.67	399.477	1437.71	1
A_23_P10182	ref|NM_003500|ens|ENST00000460921|ens|ENST00000302819|ens|ENST00000467738	hs|chr3:58490967-58490908	0	ACOX2	NM_003500	ref|Homo sapiens acyl-CoA oxidase 2, branched chain (ACOX2), mRNA [NM_003500]	ACOX2	8309	-0.943286	0.520047	0.354639	0.987258	0	1400.01	728.074	911.667	2149.95	368.608	1438.09	1
A_23_P10182	ref|NM_003500|ens|ENST00000460921|ens|ENST00000302819|ens|ENST00000467738	hs|chr3:58490967-58490908	0	ACOX2	NM_003500	ref|Homo sapiens acyl-CoA oxidase 2, branched chain (ACOX2), mRNA [NM_003500]	ACOX2	8309	-0.957389	0.514988	0.348174	0.987258	0	1432.02	737.475	906.729	2261.64	380.517	1429.29	1
A_23_P10182	ref|NM_003500|ens|ENST00000460921|ens|ENST00000302819|ens|ENST00000467738	hs|chr3:58490967-58490908	0	ACOX2	NM_003500	ref|Homo sapiens acyl-CoA oxidase 2, branched chain (ACOX2), mRNA [NM_003500]	ACOX2	8309	-0.969242	0.510774	0.362133	0.987258	0	1556.27	794.905	998.644	2425.28	387.779	1629.47	1
A_23_P10182	ref|NM_003500|ens|ENST00000460921|ens|ENST00000302819|ens|ENST00000467738	hs|chr3:58490967-58490908	0	ACOX2	NM_003500	ref|Homo sapiens acyl-CoA oxidase 2, branched chain (ACOX2), mRNA [NM_003500]	ACOX2	8309	-0.992263	0.502689	0.336044	0.987258	0	1340.56	673.882	899.963	1996.85	332.826	1364.43	1
A_23_P10182	ref|NM_003500|ens|ENST00000460921|ens|ENST00000302819|ens|ENST00000467738	hs|chr3:58490967-58490908	0	ACOX2	NM_003500	ref|Homo sapiens acyl-CoA oxidase 2, branched chain (ACOX2), mRNA [NM_003500]	ACOX2	8309	-1.01259	0.495654	0.307033	0.987258	0	1500.8	743.876	979.75	2298.95	392.397	1410.18	1
A_23_P316381	ref|NM_003501|ref|NM_001101667|ens|ENST00000356406|ens|ENST00000413009	hs|chr4:8368669-8368610	0	ACOX3	NM_003501	ref|Homo sapiens acyl-CoA oxidase 3, pristanoyl (ACOX3), transcript variant 1, mRNA [NM_003501]	ACOX3	8310	0.281325	1.21531	0.672163	0.987258	0	1071.97	1302.78	629.048	1826.76	1298.73	1306.84	1
A_33_P3395008	ref|NM_001142807|ens|ENST00000439055|gb|AK300513	hs|chr2:111875740-111875799	0	ACOXL	NM_001142807	ref|Homo sapiens acyl-CoA oxidase-like (ACOXL), mRNA [NM_001142807]	ACOXL	55289	-0.209029	0.865119	0.480228	0.987258	0	50.6245	43.7962	51.6418	49.6273	50.2172	38.1963	0
A_24_P922919	ref|NM_001040649|gb|BC020699|ens|ENST00000407983|ens|ENST00000439645	hs|chr2:272361-272420	0	ACP1	NM_001040649	ref|Homo sapiens acid phosphatase 1, soluble (ACP1), transcript variant 4, mRNA [NM_001040649]	ACP1	52	0.31717	1.24588	0.417787	0.987258	0	38.0652	47.4249	43.1336	33.5924	58.8948	38.1887	0
A_23_P56798	ref|NM_004300|ref|NM_007099|ref|NR_024080|ens|ENST00000272067	hs|chr2:277899-277958	0	ACP1	NM_004300	ref|Homo sapiens acid phosphatase 1, soluble (ACP1), transcript variant 3, mRNA [NM_004300]	ACP1	52	0.236043	1.17776	0.509106	0.987258	0	5021.63	5914.26	4137.62	6094.5	5332.2	6559.87	1
A_33_P3319155	ref|NM_001040649|ens|ENST00000405364|ens|ENST00000442386|ens|ENST00000484464	hs|chr2:271879-271938	0	ACP1	NM_001040649	ref|Homo sapiens acid phosphatase 1, soluble (ACP1), transcript variant 4, mRNA [NM_001040649]	ACP1	52	-0.128596	0.914722	0.841148	0.992672	0	2965.36	2712.48	1766.53	4977.74	2737.53	2687.65	1
A_33_P3310864	ref|NM_001131064|ens|ENST00000444355	hs|chr11:47267283-47267224	0	ACP2	NM_001131064	ref|Homo sapiens acid phosphatase 2, lysosomal (ACP2), transcript variant 2, mRNA [NM_001131064]	ACP2	53	-0.596849	0.661196	0.40106	0.987258	0	234.222	154.866	393.039	139.578	129.032	185.873	1
A_23_P138776	ref|NM_001610|ens|ENST00000256997|gb|DQ892669|gb|DQ895913	hs|chr11:47264448-47264389	0	ACP2	NM_001610	ref|Homo sapiens acid phosphatase 2, lysosomal (ACP2), transcript variant 1, mRNA [NM_001610]	ACP2	53	-0.945712	0.519173	0.0197224	0.987258	0	854.742	443.759	864.424	845.169	409.889	480.428	1
A_23_P142075	ref|NM_001611|ref|NM_001111035|ref|NM_001111034|ref|NM_001111036	hs|chr19:11685584-11685525	0	ACP5	NM_001611	ref|Homo sapiens acid phosphatase 5, tartrate resistant (ACP5), transcript variant 4, mRNA [NM_001611]	ACP5	54	-1.50383	0.352616	0.107054	0.987258	0	560.481	197.634	858.956	365.722	311.98	125.198	1
A_23_P160240	ref|NM_016361|ens|ENST00000392988|ens|ENST00000369238|gb|AK310693	hs|chr1:147127356-147127297	0	ACP6	NM_016361	ref|Homo sapiens acid phosphatase 6, lysophosphatidic (ACP6), mRNA [NM_016361]	ACP6	51205	-0.48338	0.7153	0.171154	0.987258	0	117.982	84.3926	136.436	102.024	91.4917	77.8444	1
A_23_P57760	ref|NM_152282|ref|NM_001037172|ens|ENST00000393007|ens|ENST00000393010	hs|chr3:141013068-141013127	0	ACPL2	NM_152282	ref|Homo sapiens acid phosphatase-like 2 (ACPL2), transcript variant 1, mRNA [NM_152282]	ACPL2	92370	0.706626	1.63198	0.0458557	0.987258	0	456.332	744.726	473	440.251	798.899	694.225	1
A_33_P3318534	ref|NM_152282|ref|NM_001037172|ens|ENST00000332228|ens|ENST00000393007	hs|chr3:141011914-141011973	0	ACPL2	NM_152282	ref|Homo sapiens acid phosphatase-like 2 (ACPL2), transcript variant 1, mRNA [NM_152282]	ACPL2	92370	0.137883	1.10029	0.705705	0.987258	0	146.624	161.329	119.551	179.828	182.273	142.791	1
A_24_P46130	ref|NM_001099|ens|ENST00000336375|gb|M34840|gb|BC016344	hs|chr3:132077343-132077402	0	ACPP	NM_001099	ref|Homo sapiens acid phosphatase, prostate (ACPP), transcript variant 1, mRNA [NM_001099]	ACPP	55	0.00668692	1.00465	0.981709	0.999346	0	41.2731	41.4649	36.2345	47.0125	38.5927	44.5509	0
A_24_P37589	ref|NM_001099|ref|NM_001134194|ens|ENST00000512463|ens|ENST00000351273	hs|chr3:132068798-132071574	0	ACPP	NM_001099	ref|Homo sapiens acid phosphatase, prostate (ACPP), transcript variant 1, mRNA [NM_001099]	ACPP	55	-0.187979	0.877835	0.476733	0.987258	0	44.2139	38.8125	40.8092	47.9026	39.0911	38.5358	0
A_23_P330419	ref|NM_033068|ens|ENST00000270593|ens|ENST00000270594|gb|AB463389	hs|chr19:51297824-51298087	0	ACPT	NM_033068	ref|Homo sapiens acid phosphatase, testicular (ACPT), mRNA [NM_033068]	ACPT	93650	-1.19879	0.43564	0.314859	0.987258	0	407.64	177.584	160.762	1033.64	199.647	157.96	1
A_32_P191262	ref|NM_001097|ens|ENST00000216139|gb|Y00970|gb|XM_001716670	hs|chr22:51183605-51183664	0	ACR	NM_001097	ref|Homo sapiens acrosin (ACR), mRNA [NM_001097]	ACR	49	-0.264675	0.832386	0.541971	0.987258	0	109.186	90.8853	80.8281	147.494	86.782	95.1826	1
A_33_P3382849	ref|NM_001097|ens|ENST00000216139|gb|BC111593|gb|AB587466	hs|chr22:51183222-51183281	0	ACR	NM_001097	ref|Homo sapiens acrosin (ACR), mRNA [NM_001097]	ACR	49	-1.12454	0.458647	0.302769	0.987258	0	216.405	99.2535	92.5065	506.247	101.574	96.9857	1
A_33_P3396370	ref|NM_032489|ens|ENST00000229243|ens|ENST00000414226|gb|AB051833	hs|chr12:6747301-6747242	0	ACRBP	NM_032489	ref|Homo sapiens acrosin binding protein (ACRBP), mRNA [NM_032489]	ACRBP	84519	-0.666693	0.629949	0.256414	0.987258	0	115.657	72.8578	77.1357	173.414	79.3047	66.9349	1
A_23_P171237	ref|NM_052957|ens|ENST00000373695|ens|ENST00000373696|gb|AK127607	hs|chrX:70833291-70833350	0	ACRC	NM_052957	ref|Homo sapiens acidic repeat containing (ACRC), mRNA [NM_052957]	ACRC	93953	-0.156977	0.896903	0.663493	0.987258	0	263.329	236.181	246.476	281.334	294.801	189.217	1
A_23_P202894	ref|NM_001612|ref|NM_020069|ref|NM_020107|ref|NM_020108	hs|chr11:125546255-125542555	0	ACRV1	NM_001612	ref|Homo sapiens acrosomal vesicle protein 1 (ACRV1), transcript variant 1, mRNA [NM_001612]	ACRV1	56	0.0686427	1.04873	0.791816	0.98998	0	38.741	40.6288	35.6216	42.1335	39.2123	42.0964	0
A_23_P54488	ref|NM_015162|ref|NM_001199377|gb|AK314508|gb|AB383926	hs|chr15:78465942-78463820	0	ACSBG1	NM_015162	ref|Homo sapiens acyl-CoA synthetase bubblegum family member 1 (ACSBG1), transcript variant 1, mRNA [NM_015162]	ACSBG1	23205	-0.00458132	0.99683	0.985375	0.999423	0	44.4522	44.3113	45.7684	43.1739	41.5709	47.2323	0
A_23_P131050	ref|NM_030924|ens|ENST00000252669|gb|AK302604|gb|AK057412	hs|chr19:6192982-6193041	0	ACSBG2	NM_030924	ref|Homo sapiens acyl-CoA synthetase bubblegum family member 2 (ACSBG2), mRNA [NM_030924]	ACSBG2	81616	-0.686636	0.621301	0.196413	0.987258	0	93.9386	58.3641	67.1165	131.48	53.1294	64.1145	1
A_23_P4190	ref|NM_025149|ens|ENST00000511147|ens|ENST00000510410|ens|ENST00000300441	hs|chr17:48551355-48551608	0	ACSF2	NM_025149	ref|Homo sapiens acyl-CoA synthetase family member 2 (ACSF2), mRNA [NM_025149]	ACSF2	80221	-0.0849049	0.942847	0.852075	0.993477	0	426.282	401.919	342.825	530.056	520.359	310.438	1
A_23_P259797	ref|NM_174917|ref|NM_001127214|ref|NR_023316|ens|ENST00000406948	hs|chr16:89199636-89211699	0	ACSF3	NM_174917	ref|Homo sapiens acyl-CoA synthetase family member 3 (ACSF3), nuclear gene encoding mitochondrial protein, transcript variant 1, mRNA [NM_174917]	ACSF3	197322	-0.288709	0.818634	0.342486	0.987258	0	487.851	399.372	455.754	522.209	449.227	355.05	1
A_32_P218332	ref|NM_174917|ref|NM_001127214|ref|NR_023316|ens|ENST00000393145	hs|chr16:89220744-89220803	0	ACSF3	NM_174917	ref|Homo sapiens acyl-CoA synthetase family member 3 (ACSF3), nuclear gene encoding mitochondrial protein, transcript variant 1, mRNA [NM_174917]	ACSF3	197322	-0.589616	0.66452	0.285783	0.987258	0	1525.64	1013.82	1076.36	2162.47	1203.58	853.984	1
A_23_P110212	ref|NM_001995|ens|ENST00000281455|ens|ENST00000515030|ens|ENST00000513001	hs|chr4:185676745-185676732	0	ACSL1	NM_001995	ref|Homo sapiens acyl-CoA synthetase long-chain family member 1 (ACSL1), mRNA [NM_001995]	ACSL1	2180	0.788193	1.72691	0.242966	0.987258	0	372.008	642.424	593.465	233.19	561.374	735.176	1
A_23_P110212	ref|NM_001995|ens|ENST00000281455|ens|ENST00000515030|ens|ENST00000513001	hs|chr4:185676745-185676732	0	ACSL1	NM_001995	ref|Homo sapiens acyl-CoA synthetase long-chain family member 1 (ACSL1), mRNA [NM_001995]	ACSL1	2180	0.718818	1.64583	0.243383	0.987258	0	409.521	674.003	622.955	269.213	598.946	758.466	1
A_23_P110212	ref|NM_001995|ens|ENST00000281455|ens|ENST00000515030|ens|ENST00000513001	hs|chr4:185676745-185676732	0	ACSL1	NM_001995	ref|Homo sapiens acyl-CoA synthetase long-chain family member 1 (ACSL1), mRNA [NM_001995]	ACSL1	2180	0.703416	1.62836	0.283441	0.987258	0	400.167	651.614	636.631	251.532	578.051	734.538	1
A_23_P110212	ref|NM_001995|ens|ENST00000281455|ens|ENST00000515030|ens|ENST00000513001	hs|chr4:185676745-185676732	0	ACSL1	NM_001995	ref|Homo sapiens acyl-CoA synthetase long-chain family member 1 (ACSL1), mRNA [NM_001995]	ACSL1	2180	0.656549	1.57631	0.288756	0.987258	0	398.756	628.561	611.315	260.105	548.497	720.313	1
A_23_P110212	ref|NM_001995|ens|ENST00000281455|ens|ENST00000515030|ens|ENST00000513001	hs|chr4:185676745-185676732	0	ACSL1	NM_001995	ref|Homo sapiens acyl-CoA synthetase long-chain family member 1 (ACSL1), mRNA [NM_001995]	ACSL1	2180	0.623289	1.54038	0.244346	0.987258	0	434.877	669.877	619.29	305.379	612.106	733.101	1
A_23_P110212	ref|NM_001995|ens|ENST00000281455|ens|ENST00000515030|ens|ENST00000513001	hs|chr4:185676745-185676732	0	ACSL1	NM_001995	ref|Homo sapiens acyl-CoA synthetase long-chain family member 1 (ACSL1), mRNA [NM_001995]	ACSL1	2180	0.616316	1.53296	0.278273	0.987258	0	438.608	672.367	644.679	298.408	599.859	753.639	1
A_23_P110212	ref|NM_001995|ens|ENST00000281455|ens|ENST00000515030|ens|ENST00000513001	hs|chr4:185676745-185676732	0	ACSL1	NM_001995	ref|Homo sapiens acyl-CoA synthetase long-chain family member 1 (ACSL1), mRNA [NM_001995]	ACSL1	2180	0.561164	1.47546	0.267585	0.987258	0	460.692	679.732	639.165	332.054	613.483	753.135	1
A_23_P110212	ref|NM_001995|ens|ENST00000281455|ens|ENST00000515030|ens|ENST00000513001	hs|chr4:185676745-185676732	0	ACSL1	NM_001995	ref|Homo sapiens acyl-CoA synthetase long-chain family member 1 (ACSL1), mRNA [NM_001995]	ACSL1	2180	0.546721	1.46076	0.289751	0.987258	0	436.764	638.008	609.933	312.761	562.834	723.224	1
A_23_P110212	ref|NM_001995|ens|ENST00000281455|ens|ENST00000515030|ens|ENST00000513001	hs|chr4:185676745-185676732	0	ACSL1	NM_001995	ref|Homo sapiens acyl-CoA synthetase long-chain family member 1 (ACSL1), mRNA [NM_001995]	ACSL1	2180	0.523967	1.4379	0.317702	0.987258	0	465.276	669.023	660.304	327.853	595.711	751.357	1
A_23_P110212	ref|NM_001995|ens|ENST00000281455|ens|ENST00000515030|ens|ENST00000513001	hs|chr4:185676745-185676732	0	ACSL1	NM_001995	ref|Homo sapiens acyl-CoA synthetase long-chain family member 1 (ACSL1), mRNA [NM_001995]	ACSL1	2180	0.451132	1.36711	0.332759	0.987258	0	477.124	652.282	638.543	356.511	577.615	736.601	1
A_24_P248606	ref|NM_004457|ref|NM_203372|gb|FV474840|gb|AK001471	hs|chr2:223807495-223807554	0	ACSL3	NM_004457	ref|Homo sapiens acyl-CoA synthetase long-chain family member 3 (ACSL3), transcript variant 1, mRNA [NM_004457]	ACSL3	2181	1.76811	3.40608	0.317326	0.987258	0	404.221	1376.81	1655.04	98.7258	1367.99	1385.69	1
A_23_P217564	ref|NM_004458|ref|NM_022977|ens|ENST00000340800|ens|ENST00000469796	hs|chrX:108885329-108885270	0	ACSL4	NM_004458	ref|Homo sapiens acyl-CoA synthetase long-chain family member 4 (ACSL4), transcript variant 1, mRNA [NM_004458]	ACSL4	2182	1.27631	2.42218	0.27639	0.987258	0	1395.63	3380.47	3345.29	582.247	4314.41	2648.7	1
A_33_P3217983	ref|NM_203380|ref|NM_016234|ref|NM_203379|ens|ENST00000354655	hs|chr10:114188056-114188115	0	ACSL5	NM_203380	ref|Homo sapiens acyl-CoA synthetase long-chain family member 5 (ACSL5), transcript variant 3, mRNA [NM_203380]	ACSL5	51703	-1.18826	0.438831	0.158536	0.987258	0	261.561	114.781	437.11	156.515	85.6619	153.799	1
A_32_P210031	ens|ENST00000425320|ens|ENST00000413683|ref|XM_001130142|ref|XM_001131022	hs|chr5:131278333-131269281	0	ENST00000425320	ENST00000425320	ens|acyl-CoA synthetase long-chain family member 6 [Source:HGNC Symbol;Acc:16496] [ENST00000413683]	ACSL6	23305	0.10853	1.07813	0.672033	0.987258	0	38.4361	41.439	36.112	40.9097	43.4039	39.5631	0
A_33_P3390656	ref|NM_001009185|ref|NM_015256|ens|ENST00000379249|ens|ENST00000493861	hs|chr5:131302223-131302164	0	ACSL6	NM_001009185	ref|Homo sapiens acyl-CoA synthetase long-chain family member 6 (ACSL6), transcript variant 2, mRNA [NM_001009185]	ACSL6	23305	-0.00190482	0.998681	0.994594	0.999959	0	36.2712	36.2234	36.3259	36.2166	31.7312	41.3515	0
A_23_P7562	ref|NM_001009185|ref|NM_015256|ens|ENST00000493861|ens|ENST00000296869	hs|chr5:131289962-131289903	0	ACSL6	NM_001009185	ref|Homo sapiens acyl-CoA synthetase long-chain family member 6 (ACSL6), transcript variant 2, mRNA [NM_001009185]	ACSL6	23305	-0.167617	0.890312	0.499386	0.987258	0	37.5909	33.4676	37.5097	37.6723	32.4029	34.5674	0
A_23_P106933	ref|NM_052956|ens|ENST00000520010|ens|ENST00000519745|ens|ENST00000219151	hs|chr16:20634888-20634829	0	ACSM1	NM_052956	ref|Homo sapiens acyl-CoA synthetase medium-chain family member 1 (ACSM1), mRNA [NM_052956]	ACSM1	116285	0.186245	1.1378	0.45799	0.987258	0	33.2996	37.8882	34.5016	32.1394	37.4742	38.3068	0
A_23_P106933	ref|NM_052956|ens|ENST00000520010|ens|ENST00000519745|ens|ENST00000219151	hs|chr16:20634888-20634829	0	ACSM1	NM_052956	ref|Homo sapiens acyl-CoA synthetase medium-chain family member 1 (ACSM1), mRNA [NM_052956]	ACSM1	116285	0.121401	1.08779	0.633193	0.987258	0	33.6425	36.596	33.331	33.9568	34.135	39.2343	0
A_23_P106933	ref|NM_052956|ens|ENST00000520010|ens|ENST00000519745|ens|ENST00000219151	hs|chr16:20634888-20634829	0	ACSM1	NM_052956	ref|Homo sapiens acyl-CoA synthetase medium-chain family member 1 (ACSM1), mRNA [NM_052956]	ACSM1	116285	0.108743	1.07829	0.65461	0.987258	0	40.0647	43.2013	40.3628	39.7688	44.5442	41.8989	0
A_23_P106933	ref|NM_052956|ens|ENST00000520010|ens|ENST00000519745|ens|ENST00000219151	hs|chr16:20634888-20634829	0	ACSM1	NM_052956	ref|Homo sapiens acyl-CoA synthetase medium-chain family member 1 (ACSM1), mRNA [NM_052956]	ACSM1	116285	0.09323	1.06676	0.700583	0.987258	0	35.9479	38.3477	37.0964	34.835	38.792	37.9084	0
A_23_P106933	ref|NM_052956|ens|ENST00000520010|ens|ENST00000519745|ens|ENST00000219151	hs|chr16:20634888-20634829	0	ACSM1	NM_052956	ref|Homo sapiens acyl-CoA synthetase medium-chain family member 1 (ACSM1), mRNA [NM_052956]	ACSM1	116285	-0.0639011	0.956674	0.79541	0.990177	0	38.644	36.9697	40.221	37.1289	38.4492	35.5472	0
A_23_P106933	ref|NM_052956|ens|ENST00000520010|ens|ENST00000519745|ens|ENST00000219151	hs|chr16:20634888-20634829	0	ACSM1	NM_052956	ref|Homo sapiens acyl-CoA synthetase medium-chain family member 1 (ACSM1), mRNA [NM_052956]	ACSM1	116285	-0.178183	0.883816	0.479565	0.987258	0	42.9633	37.9717	41.0551	44.9602	38.2378	37.7074	0
A_23_P106933	ref|NM_052956|ens|ENST00000520010|ens|ENST00000519745|ens|ENST00000219151	hs|chr16:20634888-20634829	0	ACSM1	NM_052956	ref|Homo sapiens acyl-CoA synthetase medium-chain family member 1 (ACSM1), mRNA [NM_052956]	ACSM1	116285	-0.189495	0.876913	0.491291	0.987258	0	42.2298	37.0319	39.6024	45.0315	40.226	34.0914	0
A_23_P106933	ref|NM_052956|ens|ENST00000520010|ens|ENST00000519745|ens|ENST00000219151	hs|chr16:20634888-20634829	0	ACSM1	NM_052956	ref|Homo sapiens acyl-CoA synthetase medium-chain family member 1 (ACSM1), mRNA [NM_052956]	ACSM1	116285	-0.390579	0.762823	0.275102	0.987258	0	42.0364	32.0663	34.7532	50.8458	33.483	30.7096	0
A_23_P106933	ref|NM_052956|ens|ENST00000520010|ens|ENST00000519745|ens|ENST00000219151	hs|chr16:20634888-20634829	0	ACSM1	NM_052956	ref|Homo sapiens acyl-CoA synthetase medium-chain family member 1 (ACSM1), mRNA [NM_052956]	ACSM1	116285	-0.403763	0.755884	0.304665	0.987258	0	50.8099	38.4064	40.2422	64.1527	36.4747	40.4404	0
A_23_P106933	ref|NM_052956|ens|ENST00000520010|ens|ENST00000519745|ens|ENST00000219151	hs|chr16:20634888-20634829	0	ACSM1	NM_052956	ref|Homo sapiens acyl-CoA synthetase medium-chain family member 1 (ACSM1), mRNA [NM_052956]	ACSM1	116285	-0.438401	0.737952	0.237814	0.987258	0	47.3587	34.9484	38.642	58.0416	35.2487	34.6508	0
A_23_P66328	ref|NM_182617|ref|NM_001105069|ref|NM_001010845|ens|ENST00000414188	hs|chr16:20548589-20548530	0	ACSM2B	NM_182617	ref|Homo sapiens acyl-CoA synthetase medium-chain family member 2B (ACSM2B), nuclear gene encoding mitochondrial protein, transcript variant 1, mRNA [NM_182617]	ACSM2B	348158	-0.0888196	0.940292	0.75589	0.9898	0	59.831	56.2586	52.291	68.4581	57.4367	55.1045	0
A_23_P317756	ref|NM_202000|ref|NM_005622|ens|ENST00000440284|ens|ENST00000450120	hs|chr16:20793038-20793097	0	ACSM3	NM_202000	ref|Homo sapiens acyl-CoA synthetase medium-chain family member 3 (ACSM3), transcript variant 2, mRNA [NM_202000]	ACSM3	6296	0.582506	1.49745	0.126448	0.987258	0	41.6326	62.3427	44.0457	39.3518	74.105	52.4474	0
A_33_P3395083	ref|NM_001080454|ens|ENST00000399422	hs|chr12:7480910-7480969	0	ACSM4	NM_001080454	ref|Homo sapiens acyl-CoA synthetase medium-chain family member 4 (ACSM4), mRNA [NM_001080454]	ACSM4	341392	-0.0996343	0.93327	0.701671	0.987258	0	40.5122	37.8088	37.6816	43.5554	39.7362	35.9749	0
A_33_P3395081	ref|NM_017888|ens|ENST00000331849|gb|BC068516	hs|chr16:20452226-20452285	0	ACSM5	NM_017888	ref|Homo sapiens acyl-CoA synthetase medium-chain family member 5 (ACSM5), mRNA [NM_017888]	ACSM5	54988	-0.122274	0.918738	0.621483	0.987258	0	43.1074	39.6045	43.6711	42.5511	41.4929	37.8019	0
A_33_P3339276	ref|NM_017888	hs|chr16:20442583-20442643	0	ACSM5	NM_017888	ref|Homo sapiens acyl-CoA synthetase medium-chain family member 5 (ACSM5), mRNA [NM_017888]	ACSM5	54988	-1.06715	0.477262	0.41537	0.987258	0	421.238	201.04	145.553	1219.08	214.62	188.321	1
A_23_P120594	ref|NM_032501|ens|ENST00000432802|ens|ENST00000376727|ens|ENST00000484396	hs|chr20:24987088-24987029	0	ACSS1	NM_032501	ref|Homo sapiens acyl-CoA synthetase short-chain family member 1 (ACSS1), nuclear gene encoding mitochondrial protein, mRNA [NM_032501]	ACSS1	84532	0.76732	1.7021	0.187759	0.987258	0	33.7199	57.3947	44.6605	25.4594	75.3118	43.7402	0
A_23_P120594	ref|NM_032501|ens|ENST00000432802|ens|ENST00000376727|ens|ENST00000484396	hs|chr20:24987088-24987029	0	ACSS1	NM_032501	ref|Homo sapiens acyl-CoA synthetase short-chain family member 1 (ACSS1), nuclear gene encoding mitochondrial protein, mRNA [NM_032501]	ACSS1	84532	0.596085	1.51161	0.247571	0.987258	0	46.1129	69.7046	49.7262	42.7621	97.8614	49.6492	0
A_23_P120594	ref|NM_032501|ens|ENST00000432802|ens|ENST00000376727|ens|ENST00000484396	hs|chr20:24987088-24987029	0	ACSS1	NM_032501	ref|Homo sapiens acyl-CoA synthetase short-chain family member 1 (ACSS1), nuclear gene encoding mitochondrial protein, mRNA [NM_032501]	ACSS1	84532	0.59285	1.50822	0.193923	0.987258	0	45.1608	68.1125	48.0031	42.4868	89.4986	51.8368	0
A_23_P120594	ref|NM_032501|ens|ENST00000432802|ens|ENST00000376727|ens|ENST00000484396	hs|chr20:24987088-24987029	0	ACSS1	NM_032501	ref|Homo sapiens acyl-CoA synthetase short-chain family member 1 (ACSS1), nuclear gene encoding mitochondrial protein, mRNA [NM_032501]	ACSS1	84532	0.574536	1.4892	0.211471	0.987258	0	44.9163	66.8893	49.1913	41.0128	87.8708	50.9177	0
A_23_P120594	ref|NM_032501|ens|ENST00000432802|ens|ENST00000376727|ens|ENST00000484396	hs|chr20:24987088-24987029	0	ACSS1	NM_032501	ref|Homo sapiens acyl-CoA synthetase short-chain family member 1 (ACSS1), nuclear gene encoding mitochondrial protein, mRNA [NM_032501]	ACSS1	84532	0.507202	1.42129	0.21053	0.987258	0	43.26	61.485	45.5585	41.0774	77.2128	48.9609	0
A_23_P120594	ref|NM_032501|ens|ENST00000432802|ens|ENST00000376727|ens|ENST00000484396	hs|chr20:24987088-24987029	0	ACSS1	NM_032501	ref|Homo sapiens acyl-CoA synthetase short-chain family member 1 (ACSS1), nuclear gene encoding mitochondrial protein, mRNA [NM_032501]	ACSS1	84532	0.50533	1.41945	0.363652	0.987258	0	45.5337	64.6328	55.4023	37.423	92.1184	45.3481	0
A_23_P120594	ref|NM_032501|ens|ENST00000432802|ens|ENST00000376727|ens|ENST00000484396	hs|chr20:24987088-24987029	0	ACSS1	NM_032501	ref|Homo sapiens acyl-CoA synthetase short-chain family member 1 (ACSS1), nuclear gene encoding mitochondrial protein, mRNA [NM_032501]	ACSS1	84532	0.482135	1.39681	0.283785	0.987258	0	44.829	62.6176	45.2291	44.4326	83.9004	46.7336	0
A_23_P120594	ref|NM_032501|ens|ENST00000432802|ens|ENST00000376727|ens|ENST00000484396	hs|chr20:24987088-24987029	0	ACSS1	NM_032501	ref|Homo sapiens acyl-CoA synthetase short-chain family member 1 (ACSS1), nuclear gene encoding mitochondrial protein, mRNA [NM_032501]	ACSS1	84532	0.38037	1.30168	0.39232	0.987258	0	52.9526	68.9271	55.7261	50.317	92.8621	51.1613	0
A_23_P120594	ref|NM_032501|ens|ENST00000432802|ens|ENST00000376727|ens|ENST00000484396	hs|chr20:24987088-24987029	0	ACSS1	NM_032501	ref|Homo sapiens acyl-CoA synthetase short-chain family member 1 (ACSS1), nuclear gene encoding mitochondrial protein, mRNA [NM_032501]	ACSS1	84532	0.36304	1.28613	0.394991	0.987258	0	48.0538	61.8036	45.4983	50.7529	81.7275	46.7369	0
A_23_P120594	ref|NM_032501|ens|ENST00000432802|ens|ENST00000376727|ens|ENST00000484396	hs|chr20:24987088-24987029	0	ACSS1	NM_032501	ref|Homo sapiens acyl-CoA synthetase short-chain family member 1 (ACSS1), nuclear gene encoding mitochondrial protein, mRNA [NM_032501]	ACSS1	84532	0.262042	1.19917	0.578448	0.987258	0	51.7672	62.078	45.2131	59.2714	85.2005	45.2306	0
A_33_P3422404	ref|NM_032501|ens|ENST00000376726|ens|ENST00000376727|ens|ENST00000432802	hs|chr20:25028781-25028722	0	ACSS1	NM_032501	ref|Homo sapiens acyl-CoA synthetase short-chain family member 1 (ACSS1), nuclear gene encoding mitochondrial protein, mRNA [NM_032501]	ACSS1	84532	-0.438036	0.738139	0.417339	0.987258	0	66.5489	49.1223	46.2776	95.6998	57.6271	41.8727	0
A_23_P210900	ref|NM_018677|ref|NM_001076552|ref|NR_028046|ens|ENST00000336325	hs|chr20:33515343-33515401	0	ACSS2	NM_018677	ref|Homo sapiens acyl-CoA synthetase short-chain family member 2 (ACSS2), transcript variant 1, mRNA [NM_018677]	ACSS2	55902	-0.188583	0.877467	0.500547	0.987258	0	631.628	554.233	563.691	707.752	552.599	555.871	1
A_23_P339119	ref|NM_024560|ens|ENST00000261206|gb|AX764482|gb|BC009317	hs|chr12:81647397-81648642	0	ACSS3	NM_024560	ref|Homo sapiens acyl-CoA synthetase short-chain family member 3 (ACSS3), mRNA [NM_024560]	ACSS3	79611	0.135327	1.09834	0.877004	0.995389	0	666.463	732.004	814.029	545.647	1480.75	361.864	1
A_23_P1102	ref|NM_001100|ens|ENST00000366682|ens|ENST00000366683|ens|ENST00000342787	hs|chr1:229567168-229567109	0	ACTA1	NM_001100	ref|Homo sapiens actin, alpha 1, skeletal muscle (ACTA1), mRNA [NM_001100]	ACTA1	58	0.302073	1.23291	0.383267	0.987258	0	57.78	71.2378	49.7348	67.1265	62.7853	80.8281	0
A_23_P1102	ref|NM_001100|ens|ENST00000366682|ens|ENST00000366683|ens|ENST00000342787	hs|chr1:229567168-229567109	0	ACTA1	NM_001100	ref|Homo sapiens actin, alpha 1, skeletal muscle (ACTA1), mRNA [NM_001100]	ACTA1	58	0.281179	1.21519	0.510819	0.987258	0	49.4586	60.1015	48.4993	50.437	44.7498	80.7197	0
A_23_P1102	ref|NM_001100|ens|ENST00000366682|ens|ENST00000366683|ens|ENST00000342787	hs|chr1:229567168-229567109	0	ACTA1	NM_001100	ref|Homo sapiens actin, alpha 1, skeletal muscle (ACTA1), mRNA [NM_001100]	ACTA1	58	0.266518	1.2029	0.473593	0.987258	0	47.9992	57.7382	48.0978	47.9008	45.719	72.9172	0
A_23_P1102	ref|NM_001100|ens|ENST00000366682|ens|ENST00000366683|ens|ENST00000342787	hs|chr1:229567168-229567109	0	ACTA1	NM_001100	ref|Homo sapiens actin, alpha 1, skeletal muscle (ACTA1), mRNA [NM_001100]	ACTA1	58	0.262559	1.1996	0.464392	0.987258	0	47.1766	56.5933	44.6312	49.8672	45.839	69.8706	0
A_23_P1102	ref|NM_001100|ens|ENST00000366682|ens|ENST00000366683|ens|ENST00000342787	hs|chr1:229567168-229567109	0	ACTA1	NM_001100	ref|Homo sapiens actin, alpha 1, skeletal muscle (ACTA1), mRNA [NM_001100]	ACTA1	58	0.241759	1.18243	0.444556	0.987258	0	50.4239	59.6229	44.533	57.0941	53.5872	66.3385	0
A_23_P1102	ref|NM_001100|ens|ENST00000366682|ens|ENST00000366683|ens|ENST00000342787	hs|chr1:229567168-229567109	0	ACTA1	NM_001100	ref|Homo sapiens actin, alpha 1, skeletal muscle (ACTA1), mRNA [NM_001100]	ACTA1	58	0.193091	1.14321	0.586927	0.987258	0	52.0322	59.4838	50.4343	53.6809	47.7601	74.0853	0
A_23_P1102	ref|NM_001100|ens|ENST00000366682|ens|ENST00000366683|ens|ENST00000342787	hs|chr1:229567168-229567109	0	ACTA1	NM_001100	ref|Homo sapiens actin, alpha 1, skeletal muscle (ACTA1), mRNA [NM_001100]	ACTA1	58	0.149949	1.10953	0.632412	0.987258	0	52.2451	57.9675	49.8672	54.7363	49.1284	68.3969	0
A_23_P1102	ref|NM_001100|ens|ENST00000366682|ens|ENST00000366683|ens|ENST00000342787	hs|chr1:229567168-229567109	0	ACTA1	NM_001100	ref|Homo sapiens actin, alpha 1, skeletal muscle (ACTA1), mRNA [NM_001100]	ACTA1	58	0.0590879	1.04181	0.875977	0.995389	0	50.3781	52.4843	43.2301	58.708	42.7	64.5105	0
A_23_P1102	ref|NM_001100|ens|ENST00000366682|ens|ENST00000366683|ens|ENST00000342787	hs|chr1:229567168-229567109	0	ACTA1	NM_001100	ref|Homo sapiens actin, alpha 1, skeletal muscle (ACTA1), mRNA [NM_001100]	ACTA1	58	0.0288689	1.02021	0.932197	0.99697	0	58.9021	60.0926	49.0962	70.6665	53.9316	66.9575	0
A_23_P1102	ref|NM_001100|ens|ENST00000366682|ens|ENST00000366683|ens|ENST00000342787	hs|chr1:229567168-229567109	0	ACTA1	NM_001100	ref|Homo sapiens actin, alpha 1, skeletal muscle (ACTA1), mRNA [NM_001100]	ACTA1	58	-0.118189	0.921344	0.755856	0.9898	0	66.4632	61.2354	53.7967	82.112	52.9865	70.7686	0
A_23_P150053	ref|NM_001613|ref|NM_001141945|ens|ENST00000458208|ens|ENST00000224784	hs|chr10:90697958-90697899	0	ACTA2	NM_001613	ref|Homo sapiens actin, alpha 2, smooth muscle, aorta (ACTA2), transcript variant 2, mRNA [NM_001613]	ACTA2	59	1.25036	2.379	0.287263	0.987258	0	66122	157304	32467.2	134662	88654.6	279113	1
A_32_P137939	ref|NM_001101|ens|ENST00000462494|ens|ENST00000425660|ens|ENST00000445914	hs|chr7:5566846-5566787	0	ACTB	NM_001101	ref|Homo sapiens actin, beta (ACTB), mRNA [NM_001101]	ACTB	60	0.419784	1.33773	0.239464	0.987258	0	267896	358372	319734	224463	336827	381295	1
A_23_P135769	ref|NM_001101|ref|NR_004845|ens|ENST00000462494|ens|ENST00000425660	hs|chr7:5567240-5567181	0	ACTB	NM_001101	ref|Homo sapiens actin, beta (ACTB), mRNA [NM_001101]	ACTB	60	-0.523723	0.695574	0.451251	0.987258	0	17226.4	11982.3	10308.4	28787.2	14246.8	10077.6	1
A_23_P135769	ref|NM_001101|ref|NR_004845|ens|ENST00000462494|ens|ENST00000425660	hs|chr7:5567240-5567181	0	ACTB	NM_001101	ref|Homo sapiens actin, beta (ACTB), mRNA [NM_001101]	ACTB	60	-0.529377	0.692854	0.443881	0.987258	0	17284.6	11975.7	10313.3	28968.1	13906	10313.3	1
A_23_P135769	ref|NM_001101|ref|NR_004845|ens|ENST00000462494|ens|ENST00000425660	hs|chr7:5567240-5567181	0	ACTB	NM_001101	ref|Homo sapiens actin, beta (ACTB), mRNA [NM_001101]	ACTB	60	-0.531274	0.691943	0.472151	0.987258	0	16051	11106.4	9244.79	27868	13423.4	9189.26	1
A_23_P135769	ref|NM_001101|ref|NR_004845|ens|ENST00000462494|ens|ENST00000425660	hs|chr7:5567240-5567181	0	ACTB	NM_001101	ref|Homo sapiens actin, beta (ACTB), mRNA [NM_001101]	ACTB	60	-0.535712	0.689818	0.442574	0.987258	0	16081	11093	9590.92	26962.9	13103.1	9391.22	1
A_23_P135769	ref|NM_001101|ref|NR_004845|ens|ENST00000462494|ens|ENST00000425660	hs|chr7:5567240-5567181	0	ACTB	NM_001101	ref|Homo sapiens actin, beta (ACTB), mRNA [NM_001101]	ACTB	60	-0.544712	0.685528	0.42847	0.987258	0	17947.9	12303.8	10796.9	29834.9	14423.8	10495.3	1
A_23_P135769	ref|NM_001101|ref|NR_004845|ens|ENST00000462494|ens|ENST00000425660	hs|chr7:5567240-5567181	0	ACTB	NM_001101	ref|Homo sapiens actin, beta (ACTB), mRNA [NM_001101]	ACTB	60	-0.552935	0.681632	0.421592	0.987258	0	15474.4	10547.8	9408.39	25451.4	12720.1	8746.57	1
A_23_P135769	ref|NM_001101|ref|NR_004845|ens|ENST00000462494|ens|ENST00000425660	hs|chr7:5567240-5567181	0	ACTB	NM_001101	ref|Homo sapiens actin, beta (ACTB), mRNA [NM_001101]	ACTB	60	-0.554876	0.680716	0.440056	0.987258	0	16063.1	10934.4	9434.15	27350	13070.7	9147.31	1
A_23_P135769	ref|NM_001101|ref|NR_004845|ens|ENST00000462494|ens|ENST00000425660	hs|chr7:5567240-5567181	0	ACTB	NM_001101	ref|Homo sapiens actin, beta (ACTB), mRNA [NM_001101]	ACTB	60	-0.558861	0.678838	0.428845	0.987258	0	17813.7	12092.6	10569.7	30022.4	14331.9	10203.2	1
A_23_P135769	ref|NM_001101|ref|NR_004845|ens|ENST00000462494|ens|ENST00000425660	hs|chr7:5567240-5567181	0	ACTB	NM_001101	ref|Homo sapiens actin, beta (ACTB), mRNA [NM_001101]	ACTB	60	-0.566285	0.675354	0.411982	0.987258	0	17767.8	11999.5	10687.8	29537.7	14055.3	10244.5	1
A_23_P135769	ref|NM_001101|ref|NR_004845|ens|ENST00000462494|ens|ENST00000425660	hs|chr7:5567240-5567181	0	ACTB	NM_001101	ref|Homo sapiens actin, beta (ACTB), mRNA [NM_001101]	ACTB	60	-0.571345	0.672989	0.405554	0.987258	0	17615.4	11855	10766.8	28820.3	14365.8	9783.03	1
A_24_P6903	ref|NM_001017992|ens|ENST00000423391|gb|BC137470|gb|BC137473	hs|chr5:56778051-56777992	0	ACTBL2	NM_001017992	ref|Homo sapiens actin, beta-like 2 (ACTBL2), mRNA [NM_001017992]	ACTBL2	345651	0.434177	1.35114	0.754778	0.9898	0	5120.51	6918.52	1602.69	16359.7	5475.49	8741.84	1
A_33_P3236382	ref|NM_005159|ens|ENST00000290378|gb|AK056592	hs|chr15:35080359-35080300	0	ACTC1	NM_005159	ref|Homo sapiens actin, alpha, cardiac muscle 1 (ACTC1), mRNA [NM_005159]	ACTC1	70	-0.136809	0.909528	0.594207	0.987258	0	40.3408	36.6911	43.2744	37.6061	35.8878	37.5124	0
A_32_P156963	ref|NM_001614|ref|NM_001199954|ref|NR_037688|ens|ENST00000331925	hs|chr17:79477625-79477566	0	ACTG1	NM_001614	ref|Homo sapiens actin, gamma 1 (ACTG1), transcript variant 2, mRNA [NM_001614]	ACTG1	71	0.628843	1.54632	0.262029	0.987258	0	67551.2	104456	95424.3	47819.7	86906.3	125550	1
A_23_P39955	ref|NM_001615|ref|NM_001199893|ens|ENST00000438902|ens|ENST00000409624	hs|chr2:74146700-74146759	0	ACTG2	NM_001615	ref|Homo sapiens actin, gamma 2, smooth muscle, enteric (ACTG2), transcript variant 1, mRNA [NM_001615]	ACTG2	72	1.02561	2.03583	0.575806	0.987258	0	28374.9	57766.3	6543.98	123034	35468.7	94081.6	1
A_33_P3418541	gb|AK310215|gb|AK129589|ens|ENST00000409918	hs|chr2:74130241-74130300	0	ACTG2	AK310215	gb|Homo sapiens cDNA, FLJ17257. [AK310215]	ACTG2	72	-0.0612337	0.958444	0.942542	0.99697	0	73.3608	70.3122	37.7883	142.42	54.4389	90.8138	1
A_23_P69249	ref|NM_178042|ref|NM_004301|ref|NM_177989|ens|ENST00000461125	hs|chr3:179305796-179305855	0	ACTL6A	NM_178042	ref|Homo sapiens actin-like 6A (ACTL6A), transcript variant 3, mRNA [NM_178042]	ACTL6A	86	0.368016	1.29058	0.178665	0.987258	0	2252.43	2906.94	2258.48	2246.4	2922.18	2891.77	1
A_23_P145681	ref|NM_016188|ens|ENST00000487125|ens|ENST00000160382|gb|CU676776	hs|chr7:100245136-100245077	0	ACTL6B	NM_016188	ref|Homo sapiens actin-like 6B (ACTL6B), mRNA [NM_016188]	ACTL6B	51412	-1.09681	0.46755	0.365454	0.987258	0	263.131	123.027	101.505	682.111	146.991	102.97	1
A_23_P31984	ref|NM_006687|ens|ENST00000333999|gb|AK314981|gb|BC014610	hs|chr9:111625848-111625907	0	ACTL7A	NM_006687	ref|Homo sapiens actin-like 7A (ACTL7A), mRNA [NM_006687]	ACTL7A	10881	-0.337281	0.791532	0.530788	0.987258	0	82.7274	65.4814	55.7841	122.684	59.4967	72.068	1
A_33_P3256972	ref|NM_006686|ens|ENST00000374667|gb|AK097670|gb|BC033789	hs|chr9:111616930-111616871	0	ACTL7B	NM_006686	ref|Homo sapiens actin-like 7B (ACTL7B), mRNA [NM_006686]	ACTL7B	10880	-0.393595	0.761231	0.318717	0.987258	0	56.4545	42.9749	44.3363	71.8848	43.7526	42.211	0
A_33_P3288659	ref|NM_030812|ens|ENST00000325482|ens|ENST00000235799|ens|ENST00000375406	hs|chr1:18152913-18152972	0	ACTL8	NM_030812	ref|Homo sapiens actin-like 8 (ACTL8), mRNA [NM_030812]	ACTL8	81569	-0.609045	0.655631	0.0694411	0.987258	0	127.881	83.8424	118.03	138.553	81.8106	85.9246	1
A_32_P176018	ref|NM_030812|ens|ENST00000235799|ens|ENST00000375406|gb|U20582	hs|chr1:18153390-18153449	0	ACTL8	NM_030812	ref|Homo sapiens actin-like 8 (ACTL8), mRNA [NM_030812]	ACTL8	81569	-0.655732	0.634753	0.324565	0.987258	0	82.5941	52.4269	50.8232	134.226	58.1309	47.2825	1
A_33_P3345011	ref|NM_178525|ens|ENST00000324436|gb|AK292258|gb|BC045752	hs|chr19:8807860-8807801	0	ACTL9	NM_178525	ref|Homo sapiens actin-like 9 (ACTL9), mRNA [NM_178525]	ACTL9	284382	-0.139727	0.907691	0.667624	0.987258	0	55.0155	49.9371	46.2433	65.4517	46.3705	53.778	0
A_23_P105957	ref|NM_001102|ref|NM_001130004|ref|NM_001130005|ens|ENST00000394419	hs|chr14:69343826-69341703	0	ACTN1	NM_001102	ref|Homo sapiens actinin, alpha 1 (ACTN1), transcript variant 2, mRNA [NM_001102]	ACTN1	87	0.977656	1.96926	0.0220202	0.987258	0	19324.2	38054.4	19648.4	19005.3	33888.8	42732	1
A_33_P3212167	ref|NM_001103|ens|ENST00000366578|gb|M86406	hs|chr1:236927181-236927240	0	ACTN2	NM_001103	ref|Homo sapiens actinin, alpha 2 (ACTN2), mRNA [NM_001103]	ACTN2	88	-0.245591	0.84347	0.420586	0.987258	0	57.8941	48.832	50.3858	66.5213	51.0722	46.6901	0
A_23_P138881	ref|NM_001104|ens|ENST00000502692|ens|ENST00000513398|gb|AK313556	hs|chr11:66329598-66329745	0	ACTN3	NM_001104	ref|Homo sapiens actinin, alpha 3 (ACTN3), mRNA [NM_001104]	ACTN3	89	0.694086	1.61786	0.216232	0.987258	0	152.844	247.28	109.741	212.876	204.913	298.408	1
A_23_P101655	ref|NM_004924|gb|AK304554|gb|U48734|gb|BC015620	hs|chr19:39220305-39220364	0	ACTN4	NM_004924	ref|Homo sapiens actinin, alpha 4 (ACTN4), mRNA [NM_004924]	ACTN4	81	0.828898	1.77633	0.0569358	0.987258	0	3481.58	6184.42	4104.23	2953.39	6805.46	5620.06	1
A_23_P101655	ref|NM_004924|gb|AK304554|gb|U48734|gb|BC015620	hs|chr19:39220305-39220364	0	ACTN4	NM_004924	ref|Homo sapiens actinin, alpha 4 (ACTN4), mRNA [NM_004924]	ACTN4	81	0.828395	1.77571	0.0464474	0.987258	0	2954.82	5246.91	3386.93	2577.84	5686.41	4841.37	1
A_23_P101655	ref|NM_004924|gb|AK304554|gb|U48734|gb|BC015620	hs|chr19:39220305-39220364	0	ACTN4	NM_004924	ref|Homo sapiens actinin, alpha 4 (ACTN4), mRNA [NM_004924]	ACTN4	81	0.824191	1.77054	0.0534974	0.987258	0	3163.43	5600.99	3757.31	2663.42	5868.28	5345.87	1
A_23_P101655	ref|NM_004924|gb|AK304554|gb|U48734|gb|BC015620	hs|chr19:39220305-39220364	0	ACTN4	NM_004924	ref|Homo sapiens actinin, alpha 4 (ACTN4), mRNA [NM_004924]	ACTN4	81	0.80813	1.75094	0.0664862	0.987258	0	3609.91	6320.74	4261.93	3057.64	7121.63	5609.92	1
A_23_P101655	ref|NM_004924|gb|AK304554|gb|U48734|gb|BC015620	hs|chr19:39220305-39220364	0	ACTN4	NM_004924	ref|Homo sapiens actinin, alpha 4 (ACTN4), mRNA [NM_004924]	ACTN4	81	0.805	1.74715	0.0564458	0.987258	0	3500.22	6115.4	3999.58	3063.21	6868.34	5445.01	1
A_23_P101655	ref|NM_004924|gb|AK304554|gb|U48734|gb|BC015620	hs|chr19:39220305-39220364	0	ACTN4	NM_004924	ref|Homo sapiens actinin, alpha 4 (ACTN4), mRNA [NM_004924]	ACTN4	81	0.804076	1.74603	0.0580714	0.987258	0	3595.09	6277.13	4171.99	3097.97	6956.14	5664.4	1
A_23_P101655	ref|NM_004924|gb|AK304554|gb|U48734|gb|BC015620	hs|chr19:39220305-39220364	0	ACTN4	NM_004924	ref|Homo sapiens actinin, alpha 4 (ACTN4), mRNA [NM_004924]	ACTN4	81	0.794764	1.73479	0.0486704	0.987258	0	3013.02	5226.97	3469.62	2616.51	5464.54	4999.73	1
A_23_P101655	ref|NM_004924|gb|AK304554|gb|U48734|gb|BC015620	hs|chr19:39220305-39220364	0	ACTN4	NM_004924	ref|Homo sapiens actinin, alpha 4 (ACTN4), mRNA [NM_004924]	ACTN4	81	0.772054	1.7077	0.0727958	0.987258	0	3730.09	6369.87	4394.58	3166.07	7147.52	5676.82	1
A_23_P101655	ref|NM_004924|gb|AK304554|gb|U48734|gb|BC015620	hs|chr19:39220305-39220364	0	ACTN4	NM_004924	ref|Homo sapiens actinin, alpha 4 (ACTN4), mRNA [NM_004924]	ACTN4	81	0.772	1.70763	0.0738272	0.987258	0	3657.72	6246.06	4331.67	3088.64	6983.9	5586.17	1
A_23_P101655	ref|NM_004924|gb|AK304554|gb|U48734|gb|BC015620	hs|chr19:39220305-39220364	0	ACTN4	NM_004924	ref|Homo sapiens actinin, alpha 4 (ACTN4), mRNA [NM_004924]	ACTN4	81	0.761777	1.69558	0.0815842	0.987258	0	3761.33	6377.64	4474.5	3161.84	7225.33	5629.4	1
A_33_P3416946	ref|NM_018477|ens|ENST00000254286	hs|chr14:58702246-58702305	0	ACTR10	NM_018477	ref|Homo sapiens actin-related protein 10 homolog (S. cerevisiae) (ACTR10), mRNA [NM_018477]	ACTR10	55860	0.292164	1.22448	0.592095	0.987258	0	208.558	255.374	314.623	138.249	238.744	273.163	1
A_24_P278367	ref|NM_005736|ens|ENST00000487599|ens|ENST00000470322|ens|ENST00000446605	hs|chr10:104239489-104239430	0	ACTR1A	NM_005736	ref|Homo sapiens ARP1 actin-related protein 1 homolog A, centractin alpha (yeast) (ACTR1A), mRNA [NM_005736]	ACTR1A	10121	0.0899698	1.06435	0.789515	0.989802	0	3206.39	3412.72	3035.48	3386.93	2795.19	4166.68	1
A_23_P28279	ref|NM_005735|ens|ENST00000289228|gb|CR611704|gb|X82207	hs|chr2:98273139-98273080	0	ACTR1B	NM_005735	ref|Homo sapiens ARP1 actin-related protein 1 homolog B, centractin beta (yeast) (ACTR1B), mRNA [NM_005735]	ACTR1B	10120	-0.252214	0.839607	0.605448	0.987258	0	1306.96	1097.33	909.808	1877.47	1106.67	1088.06	1
A_23_P377376	ref|NM_001005386|ref|NM_005722|ens|ENST00000377982|ens|ENST00000260641	hs|chr2:65496889-65496948	0	ACTR2	NM_001005386	ref|Homo sapiens ARP2 actin-related protein 2 homolog (yeast) (ACTR2), transcript variant 1, mRNA [NM_001005386]	ACTR2	10097	1.29066	2.4464	0.0814331	0.987258	0	3131.38	7660.62	4809.23	2038.9	6513.07	9010.37	1
A_23_P108785	ref|NM_005721|ens|ENST00000478928|gb|AF127773|gb|AF006083	hs|chr2:114715503-114715562	0	ACTR3	NM_005721	ref|Homo sapiens ARP3 actin-related protein 3 homolog (yeast) (ACTR3), mRNA [NM_005721]	ACTR3	10096	1.34651	2.54297	0.0928275	0.987258	0	6651.89	16915.6	9351.75	4731.49	11506.8	24866.7	1
A_23_P108785	ref|NM_005721|ens|ENST00000478928|gb|AF127773|gb|AF006083	hs|chr2:114715503-114715562	0	ACTR3	NM_005721	ref|Homo sapiens ARP3 actin-related protein 3 homolog (yeast) (ACTR3), mRNA [NM_005721]	ACTR3	10096	1.3017	2.4652	0.109551	0.987258	0	7130.07	17577	10381.7	4896.88	11970.4	25809.6	1
A_23_P108785	ref|NM_005721|ens|ENST00000478928|gb|AF127773|gb|AF006083	hs|chr2:114715503-114715562	0	ACTR3	NM_005721	ref|Homo sapiens ARP3 actin-related protein 3 homolog (yeast) (ACTR3), mRNA [NM_005721]	ACTR3	10096	1.29882	2.46028	0.104685	0.987258	0	7077	17411.4	10138.8	4939.84	11896.7	25482.5	1
A_23_P108785	ref|NM_005721|ens|ENST00000478928|gb|AF127773|gb|AF006083	hs|chr2:114715503-114715562	0	ACTR3	NM_005721	ref|Homo sapiens ARP3 actin-related protein 3 homolog (yeast) (ACTR3), mRNA [NM_005721]	ACTR3	10096	1.2951	2.45394	0.100432	0.987258	0	7183.95	17629	10264.3	5028.04	12225.1	25421.7	1
A_23_P108785	ref|NM_005721|ens|ENST00000478928|gb|AF127773|gb|AF006083	hs|chr2:114715503-114715562	0	ACTR3	NM_005721	ref|Homo sapiens ARP3 actin-related protein 3 homolog (yeast) (ACTR3), mRNA [NM_005721]	ACTR3	10096	1.29466	2.45319	0.110655	0.987258	0	7424.2	18212.9	10664.1	5168.64	12255.2	27067	1
A_23_P108785	ref|NM_005721|ens|ENST00000478928|gb|AF127773|gb|AF006083	hs|chr2:114715503-114715562	0	ACTR3	NM_005721	ref|Homo sapiens ARP3 actin-related protein 3 homolog (yeast) (ACTR3), mRNA [NM_005721]	ACTR3	10096	1.29441	2.45277	0.0988051	0.987258	0	7097.85	17409.4	10061.5	5007.14	12056.5	25139	1
A_23_P108785	ref|NM_005721|ens|ENST00000478928|gb|AF127773|gb|AF006083	hs|chr2:114715503-114715562	0	ACTR3	NM_005721	ref|Homo sapiens ARP3 actin-related protein 3 homolog (yeast) (ACTR3), mRNA [NM_005721]	ACTR3	10096	1.28761	2.44123	0.109057	0.987258	0	5964.44	14560.6	8232.09	4321.45	9566.08	22162.8	1
A_23_P108785	ref|NM_005721|ens|ENST00000478928|gb|AF127773|gb|AF006083	hs|chr2:114715503-114715562	0	ACTR3	NM_005721	ref|Homo sapiens ARP3 actin-related protein 3 homolog (yeast) (ACTR3), mRNA [NM_005721]	ACTR3	10096	1.27965	2.4278	0.104448	0.987258	0	7370.66	17894.5	10359.5	5244.16	12171.2	26309.1	1
A_23_P108785	ref|NM_005721|ens|ENST00000478928|gb|AF127773|gb|AF006083	hs|chr2:114715503-114715562	0	ACTR3	NM_005721	ref|Homo sapiens ARP3 actin-related protein 3 homolog (yeast) (ACTR3), mRNA [NM_005721]	ACTR3	10096	1.27845	2.42578	0.105328	0.987258	0	7171.44	17396.3	10251.6	5016.73	11991.7	25236.9	1
A_23_P108785	ref|NM_005721|ens|ENST00000478928|gb|AF127773|gb|AF006083	hs|chr2:114715503-114715562	0	ACTR3	NM_005721	ref|Homo sapiens ARP3 actin-related protein 3 homolog (yeast) (ACTR3), mRNA [NM_005721]	ACTR3	10096	1.26087	2.3964	0.131612	0.987258	0	6083.99	14579.6	8631.77	4288.22	9293.15	22873.4	1
A_23_P123193	ref|NM_020445|ref|NM_001040135|ens|ENST00000479402|ens|ENST00000256001	hs|chr7:152552373-152552432	0	ACTR3B	NM_020445	ref|Homo sapiens ARP3 actin-related protein 3 homolog B (yeast) (ACTR3B), transcript variant 1, mRNA [NM_020445]	ACTR3B	57180	-0.118141	0.921374	0.823478	0.991737	0	533.507	491.56	794.858	358.089	543.347	444.708	1
A_24_P303594	ref|NM_001040135|ens|ENST00000468919|ens|ENST00000377776|gb|AK315534	hs|chr7:152520488-152520547	0	ACTR3B	NM_001040135	ref|Homo sapiens ARP3 actin-related protein 3 homolog B (yeast) (ACTR3B), transcript variant 2, mRNA [NM_001040135]	ACTR3B	57180	-0.255734	0.837561	0.485995	0.987258	0	115.447	96.6942	144.047	92.5257	91.2061	102.513	1
A_33_P3334313	ref|NM_020445|ref|NM_001040135|ens|ENST00000377776|ens|ENST00000479402	hs|chr7:152551946-152552005	0	ACTR3B	NM_020445	ref|Homo sapiens ARP3 actin-related protein 3 homolog B (yeast) (ACTR3B), transcript variant 1, mRNA [NM_020445]	ACTR3B	57180	-0.629664	0.646327	0.0729337	0.987258	0	385.503	249.161	348.168	426.841	261.026	237.835	1
A_33_P3816042	ref|NR_027714|ens|ENST00000421366|ens|ENST00000444826|gb|AY026350	hs|chr2:92130429-92130488	0	ACTR3BP2	NR_027714	ref|Homo sapiens ARP3 actin-related protein 3 homolog B (yeast) pseudogene 2 (ACTR3BP2), non-coding RNA [NR_027714]	ACTR3BP2	440888	0.0209651	1.01464	0.936278	0.99697	0	51.4134	52.166	54.1988	48.7712	56.6785	48.0127	0
A_33_P3864411	ens|ENST00000421366|gb|AY026352|gb|AY026350|ens|ENST00000400789	hs|chr22:16969022-16969080	0	ENST00000421366	ENST00000421366	gb|Homo sapiens FKSG74 (FKSG74) mRNA, complete cds. [AY026352]	ACTR3BP5	399746	-1.00357	0.498764	0.371343	0.987258	0	473.956	236.392	194.156	1156.98	255.265	218.914	1
A_33_P3264089	ref|NM_001164458|ref|NM_001164459|ens|ENST00000477367|ens|ENST00000252071	hs|chr7:149992401-149992342	0	ACTR3C	NM_001164458	ref|Homo sapiens ARP3 actin-related protein 3 homolog C (yeast) (ACTR3C), transcript variant 1, mRNA [NM_001164458]	ACTR3C	653857	0.0980095	1.0703	0.843759	0.99276	0	55.578	59.4849	80.5336	38.3557	54.8032	64.5667	0
A_23_P165952	ref|NM_024855|ens|ENST00000243903|gb|AK022847|gb|BC001324	hs|chr20:37396189-37400210	0	ACTR5	NM_024855	ref|Homo sapiens ARP5 actin-related protein 5 homolog (yeast) (ACTR5), mRNA [NM_024855]	ACTR5	79913	-0.113631	0.924259	0.637301	0.987258	0	114.863	106.163	115.966	113.77	106.612	105.716	1
A_23_P162596	ref|NM_022496|ens|ENST00000188312|gb|AK222959|gb|CR618558	hs|chr12:100618004-100618063	0	ACTR6	NM_022496	ref|Homo sapiens ARP6 actin-related protein 6 homolog (yeast) (ACTR6), mRNA [NM_022496]	ACTR6	64431	0.395725	1.3156	0.195097	0.987258	0	890.289	1171.27	986.937	803.105	1134.16	1209.59	1
A_23_P80694	ref|NM_022899|ens|ENST00000231909|ens|ENST00000335754|gb|AK026232	hs|chr3:53901581-53901522	0	ACTR8	NM_022899	ref|Homo sapiens ARP8 actin-related protein 8 homolog (yeast) (ACTR8), mRNA [NM_022899]	ACTR8	93973	0.600152	1.51588	0.343346	0.987258	0	233.28	353.623	371.114	146.638	325.972	383.62	1
A_23_P147311	ref|NM_138289|ens|ENST00000371124|gb|AF440739|gb|EU832175	hs|chrX:127185348-127185289	0	ACTRT1	NM_138289	ref|Homo sapiens actin-related protein T1 (ACTRT1), mRNA [NM_138289]	ACTRT1	139741	0.000364874	1.00025	0.998893	0.999959	0	38.4807	38.4904	40.1395	36.8905	35.1422	42.1577	0
A_23_P148829	ref|NM_080431|ens|ENST00000378404|gb|AK058153|gb|BC029499	hs|chr1:2939392-2939451	0	ACTRT2	NM_080431	ref|Homo sapiens actin-related protein T2 (ACTRT2), mRNA [NM_080431]	ACTRT2	140625	-0.572142	0.672617	0.283657	0.987258	0	76.4004	51.3883	53.4829	109.138	56.9975	46.3311	1
A_33_P3360665	ref|NM_001105|ref|NM_001111067|ens|ENST00000410057|ens|ENST00000409283	hs|chr2:158594035-158593976	0	ACVR1	NM_001105	ref|Homo sapiens activin A receptor, type I (ACVR1), transcript variant 1, mRNA [NM_001105]	ACVR1	90	0.865426	1.82188	0.152304	0.987258	0	475.066	865.513	682.014	330.914	735.856	1018.02	1
A_23_P79221	ref|NM_001105|ref|NM_001111067|ens|ENST00000409283|ens|ENST00000434821	hs|chr2:158593493-158593434	0	ACVR1	NM_001105	ref|Homo sapiens activin A receptor, type I (ACVR1), transcript variant 1, mRNA [NM_001105]	ACVR1	90	0.673221	1.59463	0.213607	0.987258	0	2129.1	3395.12	2864.83	1582.31	2756.94	4181.02	1
A_33_P3364433	ref|NM_020328|ref|NM_004302|ref|NM_020327|ens|ENST00000415850	hs|chr12:52380666-52380725	0	ACVR1B	NM_020328	ref|Homo sapiens activin A receptor, type IB (ACVR1B), transcript variant 3, mRNA [NM_020328]	ACVR1B	91	-0.161716	0.893961	0.686169	0.987258	0	70.8617	63.3476	93.2066	53.8737	65.4176	61.3432	0
A_23_P397455	ref|NM_145259|ref|NM_001111031|ref|NM_001111032|ref|NM_001111033	hs|chr2:158389215-158389156	0	ACVR1C	NM_145259	ref|Homo sapiens activin A receptor, type IC (ACVR1C), transcript variant 1, mRNA [NM_145259]	ACVR1C	130399	0.834218	1.78289	0.100087	0.987258	0	49.9656	89.0831	54.0885	46.1569	67.5126	117.545	1
A_33_P3327404	ref|NM_145259|ref|NM_001111031|ref|NM_001111032|ref|NM_001111033	hs|chr2:158390313-158390254	0	ACVR1C	NM_145259	ref|Homo sapiens activin A receptor, type IC (ACVR1C), transcript variant 1, mRNA [NM_145259]	ACVR1C	130399	0.222049	1.16639	0.438092	0.987258	0	33.7129	39.3224	30.0765	37.789	38.0029	40.6877	0
A_32_P190944	ref|NM_145259|ref|NM_001111031|ref|NM_001111032|ref|NM_001111033	hs|chr2:158384001-158383942	0	ACVR1C	NM_145259	ref|Homo sapiens activin A receptor, type IC (ACVR1C), transcript variant 1, mRNA [NM_145259]	ACVR1C	130399	0.077564	1.05523	0.748098	0.9898	0	40.7585	43.0098	40.6537	40.8637	41.6176	44.4486	0
A_23_P153930	ref|NM_001616|ens|ENST00000495775|ens|ENST00000404590|ens|ENST00000241416	hs|chr2:148684923-148684982	0	ACVR2A	NM_001616	ref|Homo sapiens activin A receptor, type IIA (ACVR2A), mRNA [NM_001616]	ACVR2A	92	0.49929	1.41352	0.391826	0.987258	0	249.427	352.569	368.091	169.018	291.374	426.618	1
A_32_P134209	ref|NM_001106	hs|chr3:38534307-38534366	0	ACVR2B	NM_001106	ref|Homo sapiens activin A receptor, type IIB (ACVR2B), mRNA [NM_001106]	ACVR2B	93	0.245863	1.1858	0.71787	0.987523	0	63.4702	75.2631	109.626	36.7476	79.9713	70.8322	1
A_24_P945113	ref|NM_000020|ref|NM_001077401|ens|ENST00000267008|ens|ENST00000388922	hs|chr12:52317034-52317093	0	ACVRL1	NM_000020	ref|Homo sapiens activin A receptor type II-like 1 (ACVRL1), transcript variant 1, mRNA [NM_000020]	ACVRL1	94	0.520531	1.43448	0.531366	0.987258	0	1287.91	1847.49	2064.51	803.445	2982.38	1144.46	1
A_23_P57868	ref|NM_000666|ref|NM_001198895|ref|NM_001198898|ref|NM_001198897	hs|chr3:52022979-52023038	0	ACY1	NM_000666	ref|Homo sapiens aminoacylase 1 (ACY1), transcript variant 1, mRNA [NM_000666]	ACY1	95	-0.431915	0.741277	0.363283	0.987258	0	3566.98	2644.12	2628.04	4841.37	2986.18	2341.24	1
A_23_P47102	ref|NM_080658|ens|ENST00000255082|gb|AF359506|gb|CU679045	hs|chr11:67412555-67412321	0	ACY3	NM_080658	ref|Homo sapiens aspartoacylase (aminocyclase) 3 (ACY3), mRNA [NM_080658]	ACY3	91703	-0.0604816	0.958944	0.801941	0.990458	0	45.1789	43.324	45.4497	44.9097	44.8384	41.8608	0
A_23_P163143	ref|NM_203488|ref|NM_001107|ens|ENST00000357971|ens|ENST00000238618	hs|chr14:75520272-75520213	0	ACYP1	NM_203488	ref|Homo sapiens acylphosphatase 1, erythrocyte (common) type (ACYP1), transcript variant 2, mRNA [NM_203488]	ACYP1	97	0.0377305	1.0265	0.939038	0.99697	0	2490.92	2556.92	1837.36	3376.96	3195.11	2046.21	1
A_24_P336848	ref|NM_138448|ens|ENST00000458030|ens|ENST00000394666|ens|ENST00000494922	hs|chr2:54365796-54365855	0	ACYP2	NM_138448	ref|Homo sapiens acylphosphatase 2, muscle type (ACYP2), mRNA [NM_138448]	ACYP2	98	-0.709531	0.611519	0.0502062	0.987258	0	2615.01	1599.13	2399.04	2850.42	1520.14	1682.22	1
A_23_P210482	ref|NM_000022|ens|ENST00000464097|ens|ENST00000372874|gb|CR622953	hs|chr20:43248250-43248191	0	ADA	NM_000022	ref|Homo sapiens adenosine deaminase (ADA), mRNA [NM_000022]	ADA	100	-0.660044	0.632859	0.4808	0.987258	0	3230.39	2044.38	1846.17	5652.46	1226.68	3407.15	1
A_23_P41514	ref|NM_139243|ref|NM_001159295|ref|NM_001159285|ens|ENST00000296513	hs|chr4:123350833-123350892	0	ADAD1	NM_139243	ref|Homo sapiens adenosine deaminase domain containing 1 (testis-specific) (ADAD1), transcript variant 1, mRNA [NM_139243]	ADAD1	132612	0.0248563	1.01738	0.921653	0.99697	0	39.4039	40.0886	42.0175	36.9528	38.4222	41.8274	0
A_33_P3272402	ref|NM_139174|ref|NM_001145400|ens|ENST00000268624|ens|ENST00000315906	hs|chr16:84230712-84230771	0	ADAD2	NM_139174	ref|Homo sapiens adenosine deaminase domain containing 2 (ADAD2), transcript variant 1, mRNA [NM_139174]	ADAD2	161931	-0.120852	0.919644	0.69734	0.987258	0	96.0546	88.3361	80.9922	113.918	87.6857	88.9913	1
A_33_P3411090	ref|NM_001012969|ens|ENST00000389651|ens|ENST00000305605|gb|BC075857	hs|chr15:43641446-43641505	0	ADAL	NM_001012969	ref|Homo sapiens adenosine deaminase-like (ADAL), transcript variant 2, mRNA [NM_001012969]	ADAL	161823	-0.304175	0.809905	0.330373	0.987258	0	196.551	159.188	211.392	182.753	180.72	140.222	1
A_33_P3243857	ref|NM_001110|ens|ENST00000482945|ens|ENST00000443434|ens|ENST00000396140	hs|chr15:58889460-58889401	0	ADAM10	NM_001110	ref|Homo sapiens ADAM metallopeptidase domain 10 (ADAM10), mRNA [NM_001110]	ADAM10	102	-0.0244576	0.98319	0.95993	0.997354	0	1116.51	1097.75	1530.72	814.39	903.49	1333.77	1
A_23_P48886	ref|NM_001110|ens|ENST00000443434|ens|ENST00000396140|gb|AF009615	hs|chr15:58889314-58889255	0	ADAM10	NM_001110	ref|Homo sapiens ADAM metallopeptidase domain 10 (ADAM10), mRNA [NM_001110]	ADAM10	102	-0.0985345	0.933981	0.860283	0.994566	0	598.016	558.535	873.397	409.462	445.609	700.08	1
A_23_P207345	ref|NM_002390|ens|ENST00000200557|gb|BC144550	hs|chr17:42858865-42858924	0	ADAM11	NM_002390	ref|Homo sapiens ADAM metallopeptidase domain 11 (ADAM11), mRNA [NM_002390]	ADAM11	4185	0.0625894	1.04434	0.807099	0.991151	0	45.663	47.6876	48.2586	43.2069	50.7529	44.8074	0
A_33_P3386775	ref|NM_002390|ens|ENST00000355638|ens|ENST00000200557|gb|FV282947	hs|chr17:42857869-42857928	0	ADAM11	NM_002390	ref|Homo sapiens ADAM metallopeptidase domain 11 (ADAM11), mRNA [NM_002390]	ADAM11	4185	-0.523861	0.695508	0.441304	0.987258	0	88.1499	61.3089	52.6608	147.556	68.6308	54.7682	1
A_33_P3310929	ref|NM_003474|ens|ENST00000425024|gb|BM677156	hs|chr10:127703502-127703443	0	ADAM12	NM_003474	ref|Homo sapiens ADAM metallopeptidase domain 12 (ADAM12), transcript variant 1, mRNA [NM_003474]	ADAM12	8038	0.393488	1.31357	0.673605	0.987258	0	555.17	729.252	488.141	631.404	339.131	1568.15	1
A_33_P3256848	ref|NM_021641|ens|ENST00000368683|ens|ENST00000368676|gb|AK291629	hs|chr10:127731711-127731652	0	ADAM12	NM_021641	ref|Homo sapiens ADAM metallopeptidase domain 12 (ADAM12), transcript variant 2, mRNA [NM_021641]	ADAM12	8038	-0.29169	0.816945	0.659697	0.987258	0	234.801	191.819	166.883	330.36	127.863	287.765	1
A_23_P350512	ref|NM_021641|ens|ENST00000368683|ens|ENST00000368676|gb|CR616307	hs|chr10:127730270-127730211	0	ADAM12	NM_021641	ref|Homo sapiens ADAM metallopeptidase domain 12 (ADAM12), transcript variant 2, mRNA [NM_021641]	ADAM12	8038	-0.296661	0.814134	0.674792	0.987258	0	165.949	135.105	140.85	195.519	78.1061	233.698	1
A_33_P3380693	ref|NM_207197|ref|NM_207196|ref|NM_207194|ref|NM_207195	hs|chr1:155035192-155035251	0	ADAM15	NM_207197	ref|Homo sapiens ADAM metallopeptidase domain 15 (ADAM15), transcript variant 6, mRNA [NM_207197]	ADAM15	8751	0.084773	1.06052	0.796555	0.990177	0	18249.4	19353.9	17409.6	19129.7	15985	23432.7	1
A_23_P159227	ref|NM_207191|ref|NM_003815|ref|NM_207195|ref|NM_207194	hs|chr1:155030539-155030598	0	ADAM15	NM_207191	ref|Homo sapiens ADAM metallopeptidase domain 15 (ADAM15), transcript variant 1, mRNA [NM_207191]	ADAM15	8751	-0.0840201	0.943425	0.886907	0.996343	0	948.683	895.011	663.822	1355.79	658.269	1216.9	1
A_23_P143120	ref|NM_003183|gb|U69612|gb|U69611|gb|BC136783	hs|chr2:9630192-9630133	0	ADAM17	NM_003183	ref|Homo sapiens ADAM metallopeptidase domain 17 (ADAM17), mRNA [NM_003183]	ADAM17	6868	0.337118	1.26323	0.509275	0.987258	0	507.584	641.196	731.262	352.325	581.772	706.69	1
A_23_P72527	ref|NM_014237|ens|ENST00000520087|ens|ENST00000523755|ens|ENST00000265707	hs|chr8:39581412-39587461	0	ADAM18	NM_014237	ref|Homo sapiens ADAM metallopeptidase domain 18 (ADAM18), transcript variant 1, mRNA [NM_014237]	ADAM18	8749	-0.189477	0.876923	0.503025	0.987258	0	36.9539	32.4058	41.5979	32.8284	32.8336	31.9835	0
A_23_P374082	ref|NM_033274|ens|ENST00000257527|ens|ENST00000394020|gb|AK093535	hs|chr5:156904534-156904475	0	ADAM19	NM_033274	ref|Homo sapiens ADAM metallopeptidase domain 19 (ADAM19), mRNA [NM_033274]	ADAM19	8728	2.10348	4.29745	0.00714251	0.987258	0	7322.12	31466.5	8595.3	6237.53	24629.5	40201.4	1
A_23_P81369	ref|NM_033274|ens|ENST00000517951|ens|ENST00000430702|ens|ENST00000432888	hs|chr5:156917323-156916141	0	ADAM19	NM_033274	ref|Homo sapiens ADAM metallopeptidase domain 19 (ADAM19), mRNA [NM_033274]	ADAM19	8728	1.50946	2.84703	0.00910186	0.987258	0	212.682	605.512	251.901	179.569	562.68	651.604	1
A_33_P3340732	ref|NM_001464|ens|ENST00000435870|ens|ENST00000265708|ens|ENST00000347580	hs|chr8:39601324-39601265	0	ADAM2	NM_001464	ref|Homo sapiens ADAM metallopeptidase domain 2 (ADAM2), mRNA [NM_001464]	ADAM2	2515	-0.308338	0.807572	0.253983	0.987258	0	41.846	33.7937	39.9791	43.8001	34.5911	33.0146	0
A_23_P48698	ref|NM_003814|ens|ENST00000256389|gb|EU176278|gb|BC025378	hs|chr14:70989433-70989374	0	ADAM20	NM_003814	ref|Homo sapiens ADAM metallopeptidase domain 20 (ADAM20), mRNA [NM_003814]	ADAM20	8748	0.147193	1.10741	0.680628	0.987258	0	47.3584	52.4454	54.7806	40.9419	62.5307	43.9866	0
A_23_P367420	ref|NM_003813|ens|ENST00000267499|gb|BC109024|gb|BC109025	hs|chr14:70926263-70926322	0	ADAM21	NM_003813	ref|Homo sapiens ADAM metallopeptidase domain 21 (ADAM21), mRNA [NM_003813]	ADAM21	8747	0.179984	1.13287	0.513726	0.987258	0	61.9724	70.2067	67.4622	56.9293	65.763	74.9507	0
A_33_P3369944	ref|NM_003813|ref|NR_003951|ens|ENST00000433248|ens|ENST00000267499	hs|chr14:70926003-70926062	0	ADAM21	NM_003813	ref|Homo sapiens ADAM metallopeptidase domain 21 (ADAM21), mRNA [NM_003813]	ADAM21	8747	-0.0493324	0.966383	0.84232	0.992672	0	37.8261	36.5545	39.7534	35.9922	35.1919	37.9698	0
A_24_P243741	ref|NM_021721|ref|NM_004194|ens|ENST00000398201|ens|ENST00000265727	hs|chr7:87795178-87795237	0	ADAM22	NM_021721	ref|Homo sapiens ADAM metallopeptidase domain 22 (ADAM22), transcript variant 5, mRNA [NM_021721]	ADAM22	53616	0.290274	1.22287	0.401724	0.987258	0	41.821	51.1417	50.9526	34.3259	51.4158	50.8691	0
A_33_P3216458	ref|NM_003812|ens|ENST00000374416|ens|ENST00000374415|ens|ENST00000444281	hs|chr2:207459562-207459621	0	ADAM23	NM_003812	ref|Homo sapiens ADAM metallopeptidase domain 23 (ADAM23), mRNA [NM_003812]	ADAM23	8745	-0.263463	0.833086	0.781734	0.989802	0	193.122	160.887	145.588	256.177	76.2909	339.29	1
A_23_P351667	ref|NM_003812|ens|ENST00000431817|ens|ENST00000444281|ens|ENST00000374416	hs|chr2:207482375-207482434	0	ADAM23	NM_003812	ref|Homo sapiens ADAM metallopeptidase domain 23 (ADAM23), mRNA [NM_003812]	ADAM23	8745	-0.461072	0.726446	0.721496	0.987983	0	430.37	312.641	309.606	598.239	109.756	890.556	1
A_33_P3380652	ref|NM_021777|ens|ENST00000437154|ens|ENST00000520448|gb|AF137335	hs|chr8:24193030-24193089	0	ADAM28	NM_021777	ref|Homo sapiens ADAM metallopeptidase domain 28 (ADAM28), transcript variant 3, mRNA [NM_021777]	ADAM28	10863	-0.634518	0.644156	0.351427	0.987258	0	137.429	88.5254	88.3431	213.787	115.261	67.9912	1
A_23_P95536	ref|NM_014269|ref|NM_001130703|ref|NM_001130704|ref|NM_001130705	hs|chr4:175898508-175898567	0	ADAM29	NM_014269	ref|Homo sapiens ADAM metallopeptidase domain 29 (ADAM29), transcript variant 1, mRNA [NM_014269]	ADAM29	11086	0.124691	1.09027	0.621112	0.987258	0	36.1508	39.4143	33.9291	38.5181	39.3328	39.496	0
A_23_P126363	ref|NM_021794|ens|ENST00000369400|gb|AF171932|gb|DQ890950	hs|chr1:120436717-120436658	0	ADAM30	NM_021794	ref|Homo sapiens ADAM metallopeptidase domain 30 (ADAM30), mRNA [NM_021794]	ADAM30	11085	-0.0285584	0.980399	0.909606	0.996692	0	38.2028	37.454	36.2054	40.3104	35.6049	39.3991	0
A_23_P44665	ref|NM_145004|ens|ENST00000379907|ens|ENST00000399826|ens|ENST00000379912	hs|chr8:39133347-39138675	0	ADAM32	NM_145004	ref|Homo sapiens ADAM metallopeptidase domain 32 (ADAM32), mRNA [NM_145004]	ADAM32	203102	0.151126	1.11044	0.708956	0.987258	0	49.7912	55.2899	65.9825	37.573	54.6961	55.8901	0
A_33_P3412428	ref|NM_145004|ens|ENST00000356164|ens|ENST00000379912|ens|ENST00000379907	hs|chr8:39022579-39022638	0	ADAM32	NM_145004	ref|Homo sapiens ADAM metallopeptidase domain 32 (ADAM32), mRNA [NM_145004]	ADAM32	203102	0.113859	1.08212	0.75677	0.9898	0	54.4517	58.9232	67.9533	43.6327	64.9838	53.4278	0
A_23_P502343	ref|NM_025220|ref|NM_153202|ens|ENST00000479330|ens|ENST00000444535	hs|chr20:3649151-3649092	0	ADAM33	NM_025220	ref|Homo sapiens ADAM metallopeptidase domain 33 (ADAM33), transcript variant 1, mRNA [NM_025220]	ADAM33	80332	0.42025	1.33816	0.434883	0.987258	0	493.629	660.555	372.262	654.567	873.302	499.636	1
A_33_P3342663	ref|NM_153202|ref|NM_025220|ens|ENST00000322570|ens|ENST00000339622	hs|chr20:3654771-3654712	0	ADAM33	NM_153202	ref|Homo sapiens ADAM metallopeptidase domain 33 (ADAM33), transcript variant 2, mRNA [NM_153202]	ADAM33	80332	0.177889	1.13123	0.496342	0.987258	0	54.5343	61.6906	51.233	58.0482	64.4513	59.0482	0
A_33_P3342653	ref|NM_153202|ref|NM_025220|ens|ENST00000358035|ens|ENST00000322570	hs|chr20:3657774-3657715	0	ADAM33	NM_153202	ref|Homo sapiens ADAM metallopeptidase domain 33 (ADAM33), transcript variant 2, mRNA [NM_153202]	ADAM33	80332	-0.232957	0.850889	0.49496	0.987258	0	98.7615	84.0351	87.0201	112.087	98.0534	72.0209	1
A_33_P3256505	ref|NR_024107|ref|NR_024106|ref|NR_001569|ens|ENST00000474764	hs|chr8:39308659-39308600	0	ADAM3A	NR_024107	ref|Homo sapiens ADAM metallopeptidase domain 3A (ADAM3A), transcript variant 1, non-coding RNA [NR_024107]	ADAM3A	1587	-0.441425	0.736407	0.266232	0.987258	0	43.589	32.0992	34.8147	54.5745	34.5561	29.817	0
A_24_P230026	ref|NR_001448|ens|ENST00000498728|ens|ENST00000512764|ens|ENST00000433441	hs|chr8:39239063-39239122	0	ADAM5P	NR_001448	ref|Homo sapiens ADAM metallopeptidase domain 5, pseudogene (ADAM5P), non-coding RNA [NR_001448]	ADAM5P	255926	0.0105671	1.00735	0.970704	0.99841	0	36.0859	36.3512	36.5855	35.5931	41.8989	31.538	0
A_23_P54861	ref|NR_002224|ens|ENST00000452053|gb|AK093400|gb|AX748101	hs|chr14:106436527-106436468	0	ADAM6	NR_002224	ref|Homo sapiens ADAM metallopeptidase domain 6 (pseudogene) (ADAM6), non-coding RNA [NR_002224]	ADAM6	8755	0.102873	1.07391	0.697684	0.987258	0	33.052	35.4949	31.3019	34.9	32.7311	38.4921	0
A_23_P94296	ref|NM_003817|ens|ENST00000335595|gb|AB527100|gb|BC141422	hs|chr8:24358309-24358368	0	ADAM7	NM_003817	ref|Homo sapiens ADAM metallopeptidase domain 7 (ADAM7), mRNA [NM_003817]	ADAM7	8756	0.125122	1.0906	0.648708	0.987258	0	59.6523	65.0568	53.267	66.803	64.2441	65.8797	0
A_24_P300777	ref|NM_001109|ref|NM_001164489|ref|NM_001164490|ens|ENST00000415217	hs|chr10:135076051-135075992	0	ADAM8	NM_001109	ref|Homo sapiens ADAM metallopeptidase domain 8 (ADAM8), transcript variant 1, mRNA [NM_001109]	ADAM8	101	0.665113	1.58569	0.403106	0.987258	0	392.481	622.354	336.41	457.898	1138.52	340.201	1
A_33_P3340769	ref|NM_003816|ref|NR_027638|ref|NR_027639|ref|NR_027878	hs|chr8:38962718-38962777	0	ADAM9	NM_003816	ref|Homo sapiens ADAM metallopeptidase domain 9 (ADAM9), transcript variant 1, mRNA [NM_003816]	ADAM9	8754	0.856423	1.81054	0.199017	0.987258	0	141.89	256.898	221.402	90.9333	223.75	294.957	1
A_33_P3390172	ref|NM_001145271|ref|NM_014479|ref|NM_001145272|ens|ENST00000380824	hs|chr8:24259534-24259593	0	ADAMDEC1	NM_001145271	ref|Homo sapiens ADAM-like, decysin 1 (ADAMDEC1), transcript variant 2, mRNA [NM_001145271]	ADAMDEC1	27299	-0.220466	0.858288	0.410204	0.987258	0	36.3846	31.2285	38.5043	34.3816	29.502	33.056	0
A_23_P211039	ref|NM_006988|ens|ENST00000464589|ens|ENST00000284984|gb|AF060152	hs|chr21:28209768-28209709	0	ADAMTS1	NM_006988	ref|Homo sapiens ADAM metallopeptidase with thrombospondin type 1 motif, 1 (ADAMTS1), mRNA [NM_006988]	ADAMTS1	9510	0.32971	1.25676	0.78975	0.989802	0	4105.31	5159.4	11144.5	1512.27	3705.87	7183.03	1
A_33_P3390013	ref|NM_006988|ens|ENST00000382884|ens|ENST00000464589|ens|ENST00000284984	hs|chr21:28209959-28209900	0	ADAMTS1	NM_006988	ref|Homo sapiens ADAM metallopeptidase with thrombospondin type 1 motif, 1 (ADAMTS1), mRNA [NM_006988]	ADAMTS1	9510	0.326237	1.25374	0.786375	0.989802	0	2007.44	2516.81	5430.91	742.018	1987.63	3186.88	1
A_33_P3223056	ref|NM_030957|ens|ENST00000393912|ens|ENST00000270328|ens|ENST00000393916	hs|chr19:8645185-8645126	0	ADAMTS10	NM_030957	ref|Homo sapiens ADAM metallopeptidase with thrombospondin type 1 motif, 10 (ADAMTS10), mRNA [NM_030957]	ADAMTS10	81794	-0.460586	0.726691	0.537608	0.987258	0	1283.78	932.91	797.582	2066.35	1339.49	649.743	1
A_23_P44648	ref|NM_030955|ens|ENST00000352040|gb|AJ250725|gb|BC131733	hs|chr5:33534990-33527465	0	ADAMTS12	NM_030955	ref|Homo sapiens ADAM metallopeptidase with thrombospondin type 1 motif, 12 (ADAMTS12), mRNA [NM_030955]	ADAMTS12	81792	1.0841	2.12005	0.259964	0.987258	0	100.735	213.563	196.094	51.7483	287.981	158.376	1
A_33_P3342780	ref|NM_139026|ref|NM_139027|ref|NM_139025|ref|NR_024514	hs|chr9:136291405-136291464	0	ADAMTS13	NM_139026	ref|Homo sapiens ADAM metallopeptidase with thrombospondin type 1 motif, 13 (ADAMTS13), transcript variant 3, mRNA [NM_139026]	ADAMTS13	11093	0.0646357	1.04582	0.79031	0.989839	0	50.3432	52.6499	48.2911	52.4825	53.2831	52.0242	0
A_23_P393645	ref|NM_139025|ref|NM_139027|ref|NM_139026|ref|NR_024514	hs|chr9:136324399-136324458	0	ADAMTS13	NM_139025	ref|Homo sapiens ADAM metallopeptidase with thrombospondin type 1 motif, 13 (ADAMTS13), transcript variant 1, mRNA [NM_139025]	ADAMTS13	11093	-0.498481	0.707851	0.133379	0.987258	0	395.806	280.172	351.408	445.814	269.504	291.262	1
A_24_P275073	ref|NM_139155|ref|NM_080722|ens|ENST00000373208|ens|ENST00000373207	hs|chr10:72522132-72522191	0	ADAMTS14	NM_139155	ref|Homo sapiens ADAM metallopeptidase with thrombospondin type 1 motif, 14 (ADAMTS14), transcript variant 1, mRNA [NM_139155]	ADAMTS14	140766	-0.0708052	0.952106	0.899864	0.996521	0	287.556	273.784	443.164	186.587	247.218	303.206	1
A_33_P3316790	ref|NM_139055|ens|ENST00000299164|gb|AJ315733|gb|BC109114	hs|chr11:130343036-130343095	0	ADAMTS15	NM_139055	ref|Homo sapiens ADAM metallopeptidase with thrombospondin type 1 motif, 15 (ADAMTS15), mRNA [NM_139055]	ADAMTS15	170689	0.128768	1.09336	0.614765	0.987258	0	36.5474	39.9595	34.037	39.243	39.359	40.5691	0
A_23_P41629	ref|NM_139056|ens|ENST00000274181|gb|AB095949	hs|chr5:5319897-5319956	0	ADAMTS16	NM_139056	ref|Homo sapiens ADAM metallopeptidase with thrombospondin type 1 motif, 16 (ADAMTS16), mRNA [NM_139056]	ADAMTS16	170690	-0.352745	0.783093	0.394517	0.987258	0	57.6881	45.1752	75.4414	44.1127	43.2447	47.1919	0
A_33_P3309626	ens|ENST00000378898|gb|AK131344	hs|chr15:100603923-100603864	0	ENST00000378898	ENST00000378898	ens|ADAM metallopeptidase with thrombospondin type 1 motif, 17 [Source:HGNC Symbol;Acc:17109] [ENST00000378898]	ADAMTS17	170691	0.00977956	1.0068	0.967436	0.998029	0	45.4649	45.7742	46.1818	44.7592	47.1001	44.4856	0
A_33_P3241051	ref|NM_139057|gb|AK057529	hs|chr15:100511813-100511754	0	ADAMTS17	NM_139057	ref|Homo sapiens ADAM metallopeptidase with thrombospondin type 1 motif, 17 (ADAMTS17), mRNA [NM_139057]	ADAMTS17	170691	0.00872602	1.00607	0.972852	0.99841	0	41.9159	42.1702	44.3146	39.647	45.0347	39.4878	0
A_32_P34844	ref|NM_199355|ens|ENST00000449265|ens|ENST00000378632|ens|ENST00000282849	hs|chr16:77316423-77316364	0	ADAMTS18	NM_199355	ref|Homo sapiens ADAM metallopeptidase with thrombospondin type 1 motif, 18 (ADAMTS18), mRNA [NM_199355]	ADAMTS18	170692	-0.253906	0.838623	0.597623	0.987258	0	53.8438	45.1547	74.0853	39.1327	38.669	52.7281	0
A_33_P3317392	ref|NM_133638|ens|ENST00000274487	hs|chr5:129074234-129074293	0	ADAMTS19	NM_133638	ref|Homo sapiens ADAM metallopeptidase with thrombospondin type 1 motif, 19 (ADAMTS19), mRNA [NM_133638]	ADAMTS19	171019	-0.424659	0.745015	0.45418	0.987258	0	125.051	93.1647	81.8547	191.042	97.4723	89.0475	1
A_33_P3409649	ref|NM_021599|ens|ENST00000274609|gb|AK308213	hs|chr5:178770981-178770922	0	ADAMTS2	NM_021599	ref|Homo sapiens ADAM metallopeptidase with thrombospondin type 1 motif, 2 (ADAMTS2), transcript variant 2, mRNA [NM_021599]	ADAMTS2	9509	0.386679	1.30738	0.29105	0.987258	0	126.124	164.892	123.17	129.15	202.58	134.216	1
A_23_P321307	ref|NM_021599|ens|ENST00000274609|gb|AK308213	hs|chr5:178634520-178608104	0	ADAMTS2	NM_021599	ref|Homo sapiens ADAM metallopeptidase with thrombospondin type 1 motif, 2 (ADAMTS2), transcript variant 2, mRNA [NM_021599]	ADAMTS2	9509	0.0811177	1.05784	0.868593	0.994566	0	366.299	387.485	253.558	529.168	412.99	363.554	1
A_23_P420359	ref|NM_025003|ens|ENST00000389420|gb|AF488804|gb|AJ515153	hs|chr12:43770066-43769920	0	ADAMTS20	NM_025003	ref|Homo sapiens ADAM metallopeptidase with thrombospondin type 1 motif, 20 (ADAMTS20), mRNA [NM_025003]	ADAMTS20	80070	-0.0154328	0.98936	0.950127	0.99697	0	37.3438	36.9465	38.817	35.9266	35.253	38.7213	0
A_33_P3219514	ens|ENST00000389417|ens|ENST00000395541|gb|AJ515154|gb|AK023228	hs|chr12:43817560-43817501	0	ENST00000389417	ENST00000389417	ens|ADAM metallopeptidase with thrombospondin type 1 motif, 20 [Source:HGNC Symbol;Acc:17178] [ENST00000389417]	ADAMTS20	80070	-0.0525418	0.964236	0.854582	0.994076	0	34.8689	33.6218	34.621	35.1185	29.2352	38.6666	0
A_24_P140405	ref|NM_014243|ens|ENST00000286657|gb|AB002364|gb|BC016451	hs|chr4:73147061-73147002	0	ADAMTS3	NM_014243	ref|Homo sapiens ADAM metallopeptidase with thrombospondin type 1 motif, 3 (ADAMTS3), mRNA [NM_014243]	ADAMTS3	9508	1.7794	3.43283	0.12031	0.987258	0	85.2221	292.553	132.238	54.9221	567.093	150.923	1
A_23_P360754	ref|NM_005099|ens|ENST00000367996|gb|AB014588|gb|BC063293	hs|chr1:161159705-161159646	0	ADAMTS4	NM_005099	ref|Homo sapiens ADAM metallopeptidase with thrombospondin type 1 motif, 4 (ADAMTS4), mRNA [NM_005099]	ADAMTS4	9507	1.12546	2.18171	0.0420937	0.987258	0	1749.66	3817.24	1593.95	1920.58	4926.2	2957.92	1
A_24_P128163	ens|ENST00000367995|gb|BC030812|tc|NP482437	hs|chr1:161165982-161165923	0	ENST00000367995	ENST00000367995	ens|ADAM metallopeptidase with thrombospondin type 1 motif, 4 [Source:HGNC Symbol;Acc:220] [ENST00000367995]	ADAMTS4	9507	0.0315788	1.02213	0.955761	0.99735	0	76.2559	77.9435	53.7472	108.191	103.651	58.6121	1
A_33_P3372426	ref|NM_007038|ens|ENST00000284987|gb|AK095905	hs|chr21:28290319-28290260	0	ADAMTS5	NM_007038	ref|Homo sapiens ADAM metallopeptidase with thrombospondin type 1 motif, 5 (ADAMTS5), mRNA [NM_007038]	ADAMTS5	11096	0.986818	1.98181	0.522224	0.987258	0	344.87	683.466	872.594	136.301	1663.75	280.768	1
A_24_P334456	ref|NM_197941|ens|ENST00000261306|ens|ENST00000470597|ens|ENST00000381052	hs|chr5:64510747-64510688	0	ADAMTS6	NM_197941	ref|Homo sapiens ADAM metallopeptidase with thrombospondin type 1 motif, 6 (ADAMTS6), mRNA [NM_197941]	ADAMTS6	11174	0.853457	1.80683	0.19311	0.987258	0	75.3458	136.137	116.777	48.6139	153.683	120.594	1
A_23_P213319	ref|NM_197941|ens|ENST00000381052|ens|ENST00000381055|gb|AY692424	hs|chr5:64444890-64444831	0	ADAMTS6	NM_197941	ref|Homo sapiens ADAM metallopeptidase with thrombospondin type 1 motif, 6 (ADAMTS6), mRNA [NM_197941]	ADAMTS6	11174	0.547167	1.46121	0.0804336	0.987258	0	426.825	623.683	421.466	432.253	594.426	654.38	1
A_33_P3286953	ref|NM_197941|ens|ENST00000381052|ens|ENST00000314351|ens|ENST00000481725	hs|chr5:64447414-64447355	0	ADAMTS6	NM_197941	ref|Homo sapiens ADAM metallopeptidase with thrombospondin type 1 motif, 6 (ADAMTS6), mRNA [NM_197941]	ADAMTS6	11174	0.139541	1.10155	0.7071	0.987258	0	494.539	544.762	395.143	618.938	493.768	601.022	1
A_33_P3423718	ref|NM_014272|ens|ENST00000388820|ens|ENST00000258883|ref|XR_109177	hs|chr15:79064069-79064010	0	ADAMTS7	NM_014272	ref|Homo sapiens ADAM metallopeptidase with thrombospondin type 1 motif, 7 (ADAMTS7), mRNA [NM_014272]	ADAMTS7	11173	0.308082	1.23806	0.301767	0.987258	0	45.031	55.7512	46.0001	44.0824	62.799	49.4943	0
A_33_P3210762	ref|NM_014272|ens|ENST00000388820|ens|ENST00000438137|ens|ENST00000258883	hs|chr15:79058802-79058743	0	ADAMTS7	NM_014272	ref|Homo sapiens ADAM metallopeptidase with thrombospondin type 1 motif, 7 (ADAMTS7), mRNA [NM_014272]	ADAMTS7	11173	-0.1941	0.874118	0.767775	0.989802	0	168.778	147.532	103.031	276.478	179.215	121.449	1
A_23_P11005	ref|NM_014272|ens|ENST00000258883|ens|ENST00000388820|ens|ENST00000438137	hs|chr15:79051849-79051790	0	ADAMTS7	NM_014272	ref|Homo sapiens ADAM metallopeptidase with thrombospondin type 1 motif, 7 (ADAMTS7), mRNA [NM_014272]	ADAMTS7	11173	-0.467859	0.723037	0.258113	0.987258	0	187817	135799	147114	239783	144663	127478	1
A_33_P3215557	ref|NM_014272|ens|ENST00000388820|ens|ENST00000438137|ens|ENST00000258883	hs|chr15:79058167-79058108	0	ADAMTS7	NM_014272	ref|Homo sapiens ADAM metallopeptidase with thrombospondin type 1 motif, 7 (ADAMTS7), mRNA [NM_014272]	ADAMTS7	11173	-1.00226	0.499218	0.453228	0.987258	0	1495.83	746.745	509.152	4394.58	909.808	612.908	1
A_33_P3308347	ref|NM_007037|ens|ENST00000257359|ens|ENST00000414575|gb|AK123706	hs|chr11:130274879-130274820	0	ADAMTS8	NM_007037	ref|Homo sapiens ADAM metallopeptidase with thrombospondin type 1 motif, 8 (ADAMTS8), mRNA [NM_007037]	ADAMTS8	11095	-0.061757	0.958097	0.880568	0.995574	0	47.5604	45.5675	37.8624	59.7424	54.7054	37.956	0
A_32_P196263	ref|NM_182920|ens|ENST00000498707|ens|ENST00000477180|gb|BC130578	hs|chr3:64501648-64501589	0	ADAMTS9	NM_182920	ref|Homo sapiens ADAM metallopeptidase with thrombospondin type 1 motif, 9 (ADAMTS9), mRNA [NM_182920]	ADAMTS9	56999	1.07959	2.11344	0.0795798	0.987258	0	69.735	147.38	100.059	48.6009	143.28	151.598	1
A_33_P3302015	ref|NM_001040272|ens|ENST00000316239|ens|ENST00000380548|ens|ENST00000489062	hs|chr9:18908487-18908546	0	ADAMTSL1	NM_001040272	ref|Homo sapiens ADAMTS-like 1 (ADAMTSL1), transcript variant 4, mRNA [NM_001040272]	ADAMTSL1	92949	1.21842	2.32692	0.0515536	0.987258	0	43.1894	100.498	49.6761	37.5498	136.971	73.7372	1
A_23_P342138	ref|NM_001040272|ens|ENST00000380548|ens|ENST00000489062|ens|ENST00000380541	hs|chr9:18910193-18910252	0	ADAMTSL1	NM_001040272	ref|Homo sapiens ADAMTS-like 1 (ADAMTSL1), transcript variant 4, mRNA [NM_001040272]	ADAMTSL1	92949	0.954176	1.93747	0.268247	0.987258	0	732.514	1419.22	500.119	1072.9	838.674	2401.65	1
A_33_P3302025	ref|NM_052866|ens|ENST00000327883|gb|AK290667|gb|AK291956	hs|chr9:18622254-18622313	0	ADAMTSL1	NM_052866	ref|Homo sapiens ADAMTS-like 1 (ADAMTSL1), transcript variant 2, mRNA [NM_052866]	ADAMTSL1	92949	0.853435	1.8068	0.107993	0.987258	0	81.1862	146.687	72.5793	90.8138	109.496	196.51	1
A_33_P3413114	ref|NM_052866|ens|ENST00000327883|gb|AK290667|gb|AK291956	hs|chr9:18684741-18684800	0	ADAMTSL1	NM_052866	ref|Homo sapiens ADAMTS-like 1 (ADAMTSL1), transcript variant 2, mRNA [NM_052866]	ADAMTSL1	92949	0.584815	1.49985	0.540314	0.987258	0	144.105	216.136	67.7266	306.62	176.39	264.838	1
A_33_P3262541	ref|NM_014694|ref|NM_001145320|ens|ENST00000393061|ens|ENST00000400678	hs|chr9:136439912-136439971	0	ADAMTSL2	NM_014694	ref|Homo sapiens ADAMTS-like 2 (ADAMTSL2), transcript variant 1, mRNA [NM_014694]	ADAMTSL2	9719	-0.434222	0.740093	0.14882	0.987258	0	71.8707	53.191	69.6261	74.1877	57.3105	49.3676	0
A_23_P20697	ref|NM_014694|ref|NM_001145320|ens|ENST00000393060|ens|ENST00000393061	hs|chr9:136440296-136440355	0	ADAMTSL2	NM_014694	ref|Homo sapiens ADAMTS-like 2 (ADAMTSL2), transcript variant 1, mRNA [NM_014694]	ADAMTSL2	9719	-1.17837	0.441851	0.0674233	0.987258	0	165	72.9054	113.705	239.434	72.0877	73.7324	1
A_33_P3312509	ref|NM_014694|ref|NM_001145320|ens|ENST00000393060|ens|ENST00000393061	hs|chr9:136440581-136440640	0	ADAMTSL2	NM_014694	ref|Homo sapiens ADAMTS-like 2 (ADAMTSL2), transcript variant 1, mRNA [NM_014694]	ADAMTSL2	9719	-1.94081	0.26047	0.0065418	0.987258	0	593.829	154.675	466.929	755.217	146.164	163.68	1
A_23_P308974	ref|NM_207517|ens|ENST00000286744|gb|BC128389|gb|BC128390	hs|chr15:84708037-84708096	0	ADAMTSL3	NM_207517	ref|Homo sapiens ADAMTS-like 3 (ADAMTSL3), mRNA [NM_207517]	ADAMTSL3	57188	-0.103214	0.930956	0.685702	0.987258	0	43.4023	40.4056	46.7921	40.258	40.3628	40.4485	0
A_24_P400842	ref|NM_207517|ens|ENST00000286745|ens|ENST00000286744|gb|AK092324	hs|chr15:84506937-84527546	0	ADAMTSL3	NM_207517	ref|Homo sapiens ADAMTS-like 3 (ADAMTSL3), mRNA [NM_207517]	ADAMTSL3	57188	-0.237363	0.848295	0.354939	0.987258	0	42.693	36.2162	44.1394	41.294	36.5658	35.87	0
A_23_P115011	ref|NM_019032|ens|ENST00000369039|ens|ENST00000271643|ens|ENST00000369038	hs|chr1:150532922-150532981	0	ADAMTSL4	NM_019032	ref|Homo sapiens ADAMTS-like 4 (ADAMTSL4), transcript variant 1, mRNA [NM_019032]	ADAMTSL4	54507	0.626639	1.54396	0.431216	0.987258	0	51.0977	78.893	69.5455	37.5434	136.391	45.6342	1
A_23_P115011	ref|NM_019032|ens|ENST00000369039|ens|ENST00000271643|ens|ENST00000369038	hs|chr1:150532922-150532981	0	ADAMTSL4	NM_019032	ref|Homo sapiens ADAMTS-like 4 (ADAMTSL4), transcript variant 1, mRNA [NM_019032]	ADAMTSL4	54507	0.466495	1.38175	0.437774	0.987258	0	55.9326	77.2848	68.8719	45.4243	115.894	51.5378	1
A_23_P115011	ref|NM_019032|ens|ENST00000369039|ens|ENST00000271643|ens|ENST00000369038	hs|chr1:150532922-150532981	0	ADAMTSL4	NM_019032	ref|Homo sapiens ADAMTS-like 4 (ADAMTSL4), transcript variant 1, mRNA [NM_019032]	ADAMTSL4	54507	0.445916	1.36218	0.43638	0.987258	0	48.2851	65.7729	65.8743	35.3924	88.4723	48.8975	0
A_23_P115011	ref|NM_019032|ens|ENST00000369039|ens|ENST00000271643|ens|ENST00000369038	hs|chr1:150532922-150532981	0	ADAMTSL4	NM_019032	ref|Homo sapiens ADAMTS-like 4 (ADAMTSL4), transcript variant 1, mRNA [NM_019032]	ADAMTSL4	54507	0.358632	1.28221	0.465218	0.987258	0	52.8854	67.8102	65.6976	42.5718	89.8261	51.1903	0
A_23_P115011	ref|NM_019032|ens|ENST00000369039|ens|ENST00000271643|ens|ENST00000369038	hs|chr1:150532922-150532981	0	ADAMTSL4	NM_019032	ref|Homo sapiens ADAMTS-like 4 (ADAMTSL4), transcript variant 1, mRNA [NM_019032]	ADAMTSL4	54507	0.227753	1.17101	0.673909	0.987258	0	55.001	64.4068	65.9816	45.8479	93.7518	44.2469	0
A_23_P115011	ref|NM_019032|ens|ENST00000369039|ens|ENST00000271643|ens|ENST00000369038	hs|chr1:150532922-150532981	0	ADAMTSL4	NM_019032	ref|Homo sapiens ADAMTS-like 4 (ADAMTSL4), transcript variant 1, mRNA [NM_019032]	ADAMTSL4	54507	0.215488	1.1611	0.647349	0.987258	0	56.7189	65.8561	65.6538	49	90.2541	48.0535	0
A_23_P115011	ref|NM_019032|ens|ENST00000369039|ens|ENST00000271643|ens|ENST00000369038	hs|chr1:150532922-150532981	0	ADAMTSL4	NM_019032	ref|Homo sapiens ADAMTS-like 4 (ADAMTSL4), transcript variant 1, mRNA [NM_019032]	ADAMTSL4	54507	0.210943	1.15744	0.662605	0.987258	0	59.6061	68.9908	68.9678	51.5152	95.928	49.6177	0
A_23_P115011	ref|NM_019032|ens|ENST00000369039|ens|ENST00000271643|ens|ENST00000369038	hs|chr1:150532922-150532981	0	ADAMTSL4	NM_019032	ref|Homo sapiens ADAMTS-like 4 (ADAMTSL4), transcript variant 1, mRNA [NM_019032]	ADAMTSL4	54507	0.206051	1.15353	0.639112	0.987258	0	56.2797	64.9202	66.3106	47.7663	84.9603	49.607	0
A_23_P115011	ref|NM_019032|ens|ENST00000369039|ens|ENST00000271643|ens|ENST00000369038	hs|chr1:150532922-150532981	0	ADAMTSL4	NM_019032	ref|Homo sapiens ADAMTS-like 4 (ADAMTSL4), transcript variant 1, mRNA [NM_019032]	ADAMTSL4	54507	0.144044	1.105	0.74023	0.9898	0	57.3239	63.3428	65.6456	50.0571	84.0668	47.7277	0
A_23_P115011	ref|NM_019032|ens|ENST00000369039|ens|ENST00000271643|ens|ENST00000369038	hs|chr1:150532922-150532981	0	ADAMTSL4	NM_019032	ref|Homo sapiens ADAMTS-like 4 (ADAMTSL4), transcript variant 1, mRNA [NM_019032]	ADAMTSL4	54507	0.0779492	1.05552	0.814547	0.991737	0	63.2402	66.7511	68.7914	58.137	80.1792	55.5719	0
A_33_P3380063	ref|NM_025008|ens|ENST00000407995|ens|ENST00000369041|gb|CR592841	hs|chr1:150531065-150531124	0	ADAMTSL4	NM_025008	ref|Homo sapiens ADAMTS-like 4 (ADAMTSL4), transcript variant 2, mRNA [NM_025008]	ADAMTSL4	54507	-0.341114	0.789432	0.489289	0.987258	0	657.78	519.273	556.14	777.997	713.511	377.912	1
A_33_P3299220	ref|NM_025008|ens|ENST00000369041|gb|AY358122	hs|chr1:150531141-150531200	0	ADAMTSL4	NM_025008	ref|Homo sapiens ADAMTS-like 4 (ADAMTSL4), transcript variant 2, mRNA [NM_025008]	ADAMTSL4	54507	-0.398306	0.758749	0.382066	0.987258	0	747.437	567.117	664.401	840.85	757.232	424.733	1
A_33_P3245489	ref|NM_213604|ens|ENST00000395467|ens|ENST00000330475|ens|ENST00000413997	hs|chr19:1506798-1506739	0	ADAMTSL5	NM_213604	ref|Homo sapiens ADAMTS-like 5 (ADAMTSL5), mRNA [NM_213604]	ADAMTSL5	339366	-0.534289	0.690499	0.377917	0.987258	0	16168	11164	10369.1	25209.9	12149.7	10258.3	1
A_24_P22939	ref|NM_213604|ens|ENST00000330475|ens|ENST00000413997|gb|BC139833	hs|chr19:1506006-1505947	0	ADAMTSL5	NM_213604	ref|Homo sapiens ADAMTS-like 5 (ADAMTSL5), mRNA [NM_213604]	ADAMTSL5	339366	-1.03056	0.489519	0.160773	0.987258	0	451.254	220.897	273.312	745.047	237.137	205.77	1
A_33_P3422133	ref|NM_006869|ens|ENST00000495809|ens|ENST00000478000|ens|ENST00000265846	hs|chr7:937790-937731	0	ADAP1	NM_006869	ref|Homo sapiens ArfGAP with dual PH domains 1 (ADAP1), mRNA [NM_006869]	ADAP1	11033	-1.07785	0.473734	0.0410974	0.987258	0	1286.48	609.452	1069.97	1546.81	515.035	721.177	1
A_23_P49816	ref|NM_018404|ens|ENST00000394782|ens|ENST00000450316|ens|ENST00000330889	hs|chr17:29285179-29285238	0	ADAP2	NM_018404	ref|Homo sapiens ArfGAP with dual PH domains 2 (ADAP2), mRNA [NM_018404]	ADAP2	55803	-0.075678	0.948896	0.833553	0.992143	0	95.3144	90.4434	88.7591	102.354	113.175	72.2775	1
A_24_P362317	ref|NM_001111|ref|NM_001193495|ref|NM_015840|ref|NM_001025107	hs|chr1:154554789-154554730	0	ADAR	NM_001111	ref|Homo sapiens adenosine deaminase, RNA-specific (ADAR), transcript variant 1, mRNA [NM_001111]	ADAR	103	-0.0149529	0.989689	0.991631	0.999746	0	8540.84	8452.77	28997.1	2515.63	9240.02	7732.6	1
A_33_P3399061	ref|NR_027673|ens|ENST00000327861|ens|ENST00000462214|ens|ENST00000460734	hs|chr21:46554660-46554719	0	ADARB1	NR_027673	ref|Homo sapiens adenosine deaminase, RNA-specific, B1 (ADARB1), transcript variant 4, non-coding RNA [NR_027673]	ADARB1	104	-1.21773	0.42996	0.0684533	0.987258	0	233.278	100.3	191.724	283.838	71.4638	140.772	1
A_23_P211207	ref|NM_001112|ref|NM_015833|ref|NM_015834|ref|NM_001160230	hs|chr21:46646134-46646193	0	ADARB1	NM_001112	ref|Homo sapiens adenosine deaminase, RNA-specific, B1 (ADARB1), transcript variant 1, mRNA [NM_001112]	ADARB1	104	-1.87494	0.272639	0.224009	0.987258	0	1623.3	442.575	3545.46	743.236	183.506	1067.39	1
A_33_P3282307	ref|NM_018702|ens|ENST00000381305|ens|ENST00000490172|ens|ENST00000474762	hs|chr10:1229242-1229183	0	ADARB2	NM_018702	ref|Homo sapiens adenosine deaminase, RNA-specific, B2 (ADARB2), mRNA [NM_018702]	ADARB2	105	-0.0273197	0.981242	0.911908	0.996692	0	37.7533	37.0452	39.9267	35.6983	36.1626	37.9493	0
A_33_P3282305	ens|ENST00000381305|gb|AK289895	hs|chr10:1246321-1246262	0	ENST00000381305	ENST00000381305	ens|adenosine deaminase, RNA-specific, B2 [Source:HGNC Symbol;Acc:227] [ENST00000381305]	ADARB2	105	-0.0569159	0.961317	0.825254	0.991737	0	46.0216	44.2413	47.1263	44.9427	48.1073	40.686	0
A_23_P86751	ref|NM_018702|ens|ENST00000381307|ens|ENST00000381310|ens|ENST00000381312	hs|chr10:1228203-1228144	0	ADARB2	NM_018702	ref|Homo sapiens adenosine deaminase, RNA-specific, B2 (ADARB2), mRNA [NM_018702]	ADARB2	105	-0.189613	0.876841	0.606291	0.987258	0	54.5367	47.82	43.4628	68.4321	44.6628	51.2005	0
A_32_P29954	ref|NR_033387|ens|ENST00000421697|gb|AF086274	hs|chr10:1599022-1599081	0	NCRNA00168	NR_033387	ref|Homo sapiens non-protein coding RNA 168 (NCRNA00168), non-coding RNA [NR_033387]	ADARB2-AS1	642394	-0.695389	0.617543	0.0420342	0.987258	0	72.0728	44.508	70.775	73.3943	46.2498	42.8319	0
A_23_P141100	ref|NM_012091|ref|NR_036460|gb|AK001687	hs|chr16:75633770-75633711	0	ADAT1	NM_012091	ref|Homo sapiens adenosine deaminase, tRNA-specific 1 (ADAT1), transcript variant 1, mRNA [NM_012091]	ADAT1	23536	1.46826	2.76688	0.310312	0.987258	0	199.729	552.625	627.435	63.5789	542.751	562.68	1
A_33_P3268798	ref|NM_182503	hs|chr6:143744180-143744121	0	ADAT2	NM_182503	ref|Homo sapiens adenosine deaminase, tRNA-specific 2, TAD2 homolog (S. cerevisiae) (ADAT2), mRNA [NM_182503]	ADAT2	134637	0.71122	1.63719	0.381417	0.987258	0	70.7821	115.884	132.937	37.6879	124.554	107.817	1
A_33_P3602006	ref|NM_182503|ens|ENST00000237283|ens|ENST00000367594|gb|BC037955	hs|chr6:143748303-143748244	0	ADAT2	NM_182503	ref|Homo sapiens adenosine deaminase, tRNA-specific 2, TAD2 homolog (S. cerevisiae) (ADAT2), mRNA [NM_182503]	ADAT2	134637	-0.137127	0.909328	0.668639	0.987258	0	10636.7	9672.23	8915.85	12689.6	10130.2	9234.97	1
A_33_P3268793	ref|NM_138422|ens|ENST00000329478|gb|BC011824	hs|chr19:1913384-1913443	0	ADAT3	NM_138422	ref|Homo sapiens adenosine deaminase, tRNA-specific 3, TAD3 homolog (S. cerevisiae) (ADAT3), mRNA [NM_138422]	ADAT3	113179	-0.781416	0.581795	0.345889	0.987258	0	2276.43	1324.42	1198.41	4324.16	1320.55	1328.29	1
A_23_P103371	ref|NM_052998|ens|ENST00000341637|ens|ENST00000358680|ens|ENST00000373440	hs|chr1:33563692-33563751	0	ADC	NM_052998	ref|Homo sapiens arginine decarboxylase (ADC), mRNA [NM_052998]	ADC	113451	0.149405	1.10911	0.652899	0.987258	0	158.903	176.241	133.39	189.296	192.853	161.061	1
A_24_P11462	ref|NM_052998|ens|ENST00000294517|ens|ENST00000478204|ens|ENST00000398167	hs|chr1:33585912-33585971	0	ADC	NM_052998	ref|Homo sapiens arginine decarboxylase (ADC), mRNA [NM_052998]	ADC	113451	-0.321855	0.800041	0.616945	0.987258	0	716.344	573.104	438.216	1170.99	656.96	499.951	1
A_23_P25945	ref|NM_020421|ref|NM_001142545|ens|ENST00000238561|ens|ENST00000341211	hs|chr14:78398050-78399617	0	ADCK1	NM_020421	ref|Homo sapiens aarF domain containing kinase 1 (ADCK1), transcript variant 1, mRNA [NM_020421]	ADCK1	57143	0.0501781	1.03539	0.897306	0.996521	0	95.1044	98.4704	121.107	74.685	87.6246	110.659	1
A_24_P291978	ref|NM_052853|ens|ENST00000498423|ens|ENST00000072869|gb|BC014107	hs|chr7:140378966-140379025	0	ADCK2	NM_052853	ref|Homo sapiens aarF domain containing kinase 2 (ADCK2), mRNA [NM_052853]	ADCK2	90956	0.029707	1.0208	0.92375	0.99697	0	104.388	106.56	92.2087	118.177	94.209	120.531	1
A_23_P85598	ref|NM_020247|ens|ENST00000478406|ens|ENST00000366777|ens|ENST00000366778	hs|chr1:227174695-227174754	0	ADCK3	NM_020247	ref|Homo sapiens aarF domain containing kinase 3 (ADCK3), nuclear gene encoding mitochondrial protein, mRNA [NM_020247]	ADCK3	56997	-0.181406	0.881843	0.736492	0.9898	0	187.605	165.438	283.238	124.262	177.297	154.373	1
A_33_P3372924	ens|ENST00000407840|ref|XR_112014|ref|XR_115198|gb|AK123980	hs|chr1:227087089-227087148	0	ENST00000407840	ENST00000407840	ref|PREDICTED: Homo sapiens hypothetical LOC100508726 (LOC100508726), partial miscRNA [XR_112014]	ADCK3	56997	-0.431652	0.741413	0.332862	0.987258	0	92.7865	68.7931	69.4405	123.981	64.7103	73.1335	1
A_23_P208400	ref|NM_024876|ref|NM_001142555|ens|ENST00000324464|ens|ENST00000450541	hs|chr19:41201941-41198931	0	ADCK4	NM_024876	ref|Homo sapiens aarF domain containing kinase 4 (ADCK4), transcript variant 1, mRNA [NM_024876]	ADCK4	79934	-0.126715	0.915915	0.67691	0.987258	0	110.098	100.84	128.044	94.6667	106.59	95.4003	1
A_23_P94365	ref|NM_174922|ens|ENST00000308860|gb|AB529014|gb|BC143322	hs|chr8:145618056-145618191	0	ADCK5	NM_174922	ref|Homo sapiens aarF domain containing kinase 5 (ADCK5), mRNA [NM_174922]	ADCK5	203054	-0.316657	0.802928	0.483337	0.987258	0	734.633	589.857	566.817	952.134	709.054	490.699	1
A_24_P577694	ref|NM_021116|ens|ENST00000297323|gb|CR596735|gb|AK055343	hs|chr7:45762328-45762385	0	ADCY1	NM_021116	ref|Homo sapiens adenylate cyclase 1 (brain) (ADCY1), mRNA [NM_021116]	ADCY1	107	0.041498	1.02918	0.88636	0.996227	0	40.1223	41.2932	42.8056	37.6073	36.2252	47.0702	0
A_23_P126313	ref|NM_018417|ref|NM_001167749|ens|ENST00000367848|ens|ENST00000485964	hs|chr1:167779035-167778976	0	ADCY10	NM_018417	ref|Homo sapiens adenylate cyclase 10 (soluble) (ADCY10), transcript variant 1, mRNA [NM_018417]	ADCY10	55811	-0.367048	0.775367	0.204172	0.987258	0	57.8313	44.8405	55.4556	60.3088	41.8434	48.0522	0
A_32_P405973	ref|NM_020546|ens|ENST00000338316|gb|AB028983	hs|chr5:7829128-7829187	0	ADCY2	NM_020546	ref|Homo sapiens adenylate cyclase 2 (brain) (ADCY2), mRNA [NM_020546]	ADCY2	108	0.136785	1.09945	0.573191	0.987258	0	34.7159	38.1684	34.4933	34.9398	37.8561	38.4834	0
A_33_P3320217	ref|NM_020546|ens|ENST00000382532|ens|ENST00000338316|gb|BC111743	hs|chr5:7828412-7828471	0	ADCY2	NM_020546	ref|Homo sapiens adenylate cyclase 2 (brain) (ADCY2), mRNA [NM_020546]	ADCY2	108	-0.132981	0.911945	0.710891	0.987258	0	53.2958	48.6028	42.3709	67.0374	47.4244	49.8105	0
A_23_P67864	ref|NM_004036|ens|ENST00000447634|ens|ENST00000415879|ens|ENST00000260600	hs|chr2:25042332-25042273	0	ADCY3	NM_004036	ref|Homo sapiens adenylate cyclase 3 (ADCY3), mRNA [NM_004036]	ADCY3	109	0.502801	1.41696	0.153308	0.987258	0	3138.87	4447.66	3233.46	3047.04	3804.38	5199.7	1
A_23_P381261	ref|NM_139247|ref|NM_001198568|ref|NM_001198592|ens|ENST00000418030	hs|chr14:24787727-24787668	0	ADCY4	NM_139247	ref|Homo sapiens adenylate cyclase 4 (ADCY4), transcript variant 2, mRNA [NM_139247]	ADCY4	196883	1.55214	2.93252	0.343458	0.987258	0	195.205	572.443	64.0316	595.098	1149.88	284.978	1
A_33_P3337161	ref|NM_001198568|ref|NM_001198592|ref|NM_139247|ens|ENST00000396747	hs|chr14:24793331-24793272	0	ADCY4	NM_001198568	ref|Homo sapiens adenylate cyclase 4 (ADCY4), transcript variant 3, mRNA [NM_001198568]	ADCY4	196883	-0.526443	0.694264	0.563389	0.987258	0	255.215	177.186	122.627	531.161	203.532	154.251	1
A_23_P136623	ref|NM_183357|ref|NM_001199642|ens|ENST00000462833|gb|AB527359	hs|chr3:123008701-123008642	0	ADCY5	NM_183357	ref|Homo sapiens adenylate cyclase 5 (ADCY5), transcript variant 1, mRNA [NM_183357]	ADCY5	111	-0.157643	0.896488	0.559542	0.987258	0	48.6889	43.6491	44.511	53.259	41.7303	45.656	0
A_23_P501547	ref|NM_015270|ref|NM_020983|ens|ENST00000395210|ens|ENST00000307885	hs|chr12:49160628-49160569	0	ADCY6	NM_015270	ref|Homo sapiens adenylate cyclase 6 (ADCY6), transcript variant 1, mRNA [NM_015270]	ADCY6	112	0.930863	1.90642	0.321447	0.987258	0	476.954	909.272	964.75	235.797	1096.28	754.164	1
A_24_P416177	ref|NM_001114|ens|ENST00000254235|ens|ENST00000394697|gb|D25538	hs|chr16:50351847-50351906	0	ADCY7	NM_001114	ref|Homo sapiens adenylate cyclase 7 (ADCY7), mRNA [NM_001114]	ADCY7	113	0.285723	1.21902	0.802116	0.990458	0	641.943	782.542	1494.81	275.682	488.86	1252.66	1
A_23_P169993	ref|NM_001115|ens|ENST00000286355|gb|DQ104739|gb|AB462937	hs|chr8:131812687-131797678	0	ADCY8	NM_001115	ref|Homo sapiens adenylate cyclase 8 (brain) (ADCY8), mRNA [NM_001115]	ADCY8	114	-0.0305924	0.979018	0.90463	0.996521	0	35.3656	34.6236	38.3489	32.6144	35.2644	33.9944	0
A_24_P935103	ref|NM_001116|ens|ENST00000294016|gb|AB011092|gb|BC068612	hs|chr16:4012826-4012767	0	ADCY9	NM_001116	ref|Homo sapiens adenylate cyclase 9 (ADCY9), mRNA [NM_001116]	ADCY9	115	0.346736	1.27168	0.731961	0.989688	0	2306.84	2933.57	5356.07	993.552	3283.87	2620.63	1
A_33_P3392092	ref|NM_001099733|ref|NM_001117|ens|ENST00000400219|ens|ENST00000450565	hs|chr18:911932-911991	0	ADCYAP1	NM_001099733	ref|Homo sapiens adenylate cyclase activating polypeptide 1 (pituitary) (ADCYAP1), transcript variant 1, mRNA [NM_001099733]	ADCYAP1	116	-0.0727725	0.950809	0.774767	0.989802	0	31.934	30.3631	34.3185	29.7151	29.5113	31.2395	0
A_23_P157109	ref|NM_001118|ref|NM_001199637|ref|NM_001199636|ref|NM_001199635	hs|chr7:31127280-31132286	0	ADCYAP1R1	NM_001118	ref|Homo sapiens adenylate cyclase activating polypeptide 1 (pituitary) receptor type I (ADCYAP1R1), transcript variant 3, mRNA [NM_001118]	ADCYAP1R1	117	-0.418483	0.748211	0.471678	0.987258	0	84.9683	63.5742	54.7674	131.823	61.1128	66.1348	1
A_24_P100742	ref|NM_014189|ref|NM_001119|ref|NM_176801|ref|NM_014190	hs|chr4:2909528-2910257	0	ADD1	NM_014189	ref|Homo sapiens adducin 1 (alpha) (ADD1), transcript variant 2, mRNA [NM_014189]	ADD1	118	0.915485	1.8862	0.144595	0.987258	0	402.161	758.557	601.673	268.806	696.159	826.548	1
A_33_P3241786	ref|NM_017482|ref|NM_001185055|ens|ENST00000417402|ens|ENST00000413157	hs|chr2:70902283-70902224	0	ADD2	NM_017482	ref|Homo sapiens adducin 2 (beta) (ADD2), transcript variant 2, mRNA [NM_017482]	ADD2	119	0.00656763	1.00456	0.97927	0.999328	0	37.63	37.8017	35.0556	40.3935	39.0049	36.6356	0
A_33_P3241782	ref|NM_001617|ref|NM_001185054|ref|NM_017488|ens|ENST00000403045	hs|chr2:70901872-70901813	0	ADD2	NM_001617	ref|Homo sapiens adducin 2 (beta) (ADD2), transcript variant 1, mRNA [NM_001617]	ADD2	119	-0.153681	0.898954	0.58073	0.987258	0	40.166	36.1074	35.8119	45.0495	36.848	35.3816	0
A_23_P421436	ref|NM_017488|ref|NM_001617|ref|NM_001185054|ens|ENST00000264439	hs|chr2:70889810-70889751	0	ADD2	NM_017488	ref|Homo sapiens adducin 2 (beta) (ADD2), transcript variant 4, mRNA [NM_017488]	ADD2	119	-0.375114	0.771045	0.276891	0.987258	0	42.2873	32.6054	35.3829	50.5391	33.4788	31.7547	0
A_24_P90097	ref|NM_016824|ref|NM_001121|ref|NM_019903|ens|ENST00000277900	hs|chr10:111894827-111894886	0	ADD3	NM_016824	ref|Homo sapiens adducin 3 (gamma) (ADD3), transcript variant 1, mRNA [NM_016824]	ADD3	120	0.979497	1.97178	0.341859	0.987258	0	2624.32	5174.58	5893.07	1168.67	4888.92	5476.95	1
A_24_P291658	ref|NM_000667|ens|ENST00000209668|ens|ENST00000506651|ens|ENST00000515694	hs|chr4:100200647-100200588	0	ADH1A	NM_000667	ref|Homo sapiens alcohol dehydrogenase 1A (class I), alpha polypeptide (ADH1A), mRNA [NM_000667]	ADH1A	124	0.734071	1.66333	0.28832	0.987258	0	47.6109	79.1925	45.6379	49.6692	131.816	47.5774	1
A_33_P3353737	ref|NM_000668	hs|chr4:100227587-100227528	0	ADH1B	NM_000668	ref|Homo sapiens alcohol dehydrogenase 1B (class I), beta polypeptide (ADH1B), mRNA [NM_000668]	ADH1B	125	-0.0185608	0.987217	0.948374	0.99697	0	37.3043	36.8274	32.8636	42.345	34.6246	39.1704	0
A_23_P81158	ref|NM_000669|ens|ENST00000515683|gb|BC066228|gb|BC067420	hs|chr4:100260740-100257881	0	ADH1C	NM_000669	ref|Homo sapiens alcohol dehydrogenase 1C (class I), gamma polypeptide (ADH1C), mRNA [NM_000669]	ADH1C	126	0.493778	1.40813	0.580892	0.987258	0	156.906	220.943	85.9008	286.604	335.451	145.523	1
A_23_P30098	ref|NM_000670|ens|ENST00000423445|ens|ENST00000265512|gb|BC022319	hs|chr4:100045550-100045491	0	ADH4	NM_000670	ref|Homo sapiens alcohol dehydrogenase 4 (class II), pi polypeptide (ADH4), mRNA [NM_000670]	ADH4	127	0.431754	1.34887	0.177022	0.987258	0	41.8036	56.3878	42.9775	40.6618	49.9458	63.6606	0
A_23_P18692	ref|NM_000671|ens|ENST00000296412|gb|AK226177|gb|CB242613	hs|chr4:99992455-99992396	0	ADH5	NM_000671	ref|Homo sapiens alcohol dehydrogenase 5 (class III), chi polypeptide (ADH5), mRNA [NM_000671]	ADH5	128	0.691775	1.61527	0.266409	0.987258	0	1689.67	2729.27	2641.32	1080.89	2726.89	2731.66	1
A_24_P25550	ref|NM_001102470|ens|ENST00000394899|ens|ENST00000354704|gb|BC039065	hs|chr4:100124982-100124923	0	ADH6	NM_001102470	ref|Homo sapiens alcohol dehydrogenase 6 (class V) (ADH6), transcript variant 1, mRNA [NM_001102470]	ADH6	130	0.162145	1.11895	0.569366	0.987258	0	34.4751	38.5759	36.263	32.7754	34.3304	43.3465	0
A_23_P41498	ref|NM_000672|ens|ENST00000237653|ens|ENST00000407820|ens|ENST00000507484	hs|chr4:100128617-100126176	0	ADH6	NM_000672	ref|Homo sapiens alcohol dehydrogenase 6 (class V) (ADH6), transcript variant 2, mRNA [NM_000672]	ADH6	130	-0.247762	0.842202	0.452352	0.987258	0	44.1805	37.2089	39.72	49.1421	32.1048	43.1245	0
A_33_P3406677	ref|NM_000673|ref|NM_001166504|ens|ENST00000394882|ens|ENST00000437033	hs|chr4:100341750-100341691	0	ADH7	NM_000673	ref|Homo sapiens alcohol dehydrogenase 7 (class IV), mu or sigma polypeptide (ADH7), transcript variant 2, mRNA [NM_000673]	ADH7	131	0.0647273	1.04589	0.790641	0.989839	0	38.9065	40.6918	40.4502	37.4218	41.7286	39.6809	0
A_23_P92562	ref|NM_000673|ref|NM_001166504|ens|ENST00000437033|ens|ENST00000209665	hs|chr4:100333822-100333763	0	ADH7	NM_000673	ref|Homo sapiens alcohol dehydrogenase 7 (class IV), mu or sigma polypeptide (ADH7), transcript variant 2, mRNA [NM_000673]	ADH7	131	-0.0339557	0.976738	0.890472	0.996482	0	33.5713	32.7904	34.8712	32.3199	34.3237	31.3256	0
A_33_P3300747	ref|NM_144650|ens|ENST00000396621|ens|ENST00000449512|ens|ENST00000443372	hs|chr8:67359516-67359575	0	ADHFE1	NM_144650	ref|Homo sapiens alcohol dehydrogenase, iron containing, 1 (ADHFE1), nuclear gene encoding mitochondrial protein, mRNA [NM_144650]	ADHFE1	137872	0.505313	1.41943	0.317666	0.987258	0	43.1966	61.3145	52.5205	35.5279	82.112	45.7847	0
A_23_P157569	ref|NM_144650|ens|ENST00000496501|ens|ENST00000466739|ens|ENST00000435418	hs|chr8:67380656-67380715	0	ADHFE1	NM_144650	ref|Homo sapiens alcohol dehydrogenase, iron containing, 1 (ADHFE1), nuclear gene encoding mitochondrial protein, mRNA [NM_144650]	ADHFE1	137872	0.327862	1.25515	0.758981	0.989802	0	180.177	226.149	208.401	155.775	550.533	92.8982	1
A_32_P52911	ref|NM_018269|ens|ENST00000327435|gb|AK225278|gb|CR611145	hs|chr2:3502016-3501957	0	ADI1	NM_018269	ref|Homo sapiens acireductone dioxygenase 1 (ADI1), mRNA [NM_018269]	ADI1	55256	0.426236	1.34372	0.31411	0.987258	0	1964.13	2639.25	1497.84	2575.59	2671.16	2607.73	1
A_23_P148194	ref|NM_018269|ens|ENST00000327435|gb|AB158319|gb|AF403478	hs|chr2:3502720-3502661	0	ADI1	NM_018269	ref|Homo sapiens acireductone dioxygenase 1 (ADI1), mRNA [NM_018269]	ADI1	55256	-0.158473	0.895973	0.665864	0.987258	0	7196.76	6448.1	6600.25	7847.18	8053.2	5162.92	1
A_32_P423691	ref|NM_001018082|ens|ENST00000470147|gb|BC119705|gb|BC119704	hs|chr20:37209990-37214703	0	ADIG	NM_001018082	ref|Homo sapiens adipogenin (ADIG), mRNA [NM_001018082]	ADIG	149685	-0.298565	0.813061	0.258557	0.987258	0	43.3774	35.2685	42.1822	44.6064	35.0896	35.4483	0
A_23_P369237	ref|NM_004797|ref|NM_001177800|ens|ENST00000444204|ens|ENST00000320741	hs|chr3:186575311-186575370	0	ADIPOQ	NM_004797	ref|Homo sapiens adiponectin, C1Q and collagen domain containing (ADIPOQ), transcript variant 2, mRNA [NM_004797]	ADIPOQ	9370	0.178552	1.13175	0.517502	0.987258	0	38.8509	43.9694	43.1218	35.0029	45.2107	42.7621	0
A_23_P369237	ref|NM_004797|ref|NM_001177800|ens|ENST00000444204|ens|ENST00000320741	hs|chr3:186575311-186575370	0	ADIPOQ	NM_004797	ref|Homo sapiens adiponectin, C1Q and collagen domain containing (ADIPOQ), transcript variant 2, mRNA [NM_004797]	ADIPOQ	9370	0.0489971	1.03455	0.840441	0.992672	0	43.5519	45.0564	42.8735	44.241	47.087	43.1134	0
A_23_P369237	ref|NM_004797|ref|NM_001177800|ens|ENST00000444204|ens|ENST00000320741	hs|chr3:186575311-186575370	0	ADIPOQ	NM_004797	ref|Homo sapiens adiponectin, C1Q and collagen domain containing (ADIPOQ), transcript variant 2, mRNA [NM_004797]	ADIPOQ	9370	0.0234751	1.0164	0.931297	0.99697	0	42.6738	43.3739	37.958	47.9756	43.1518	43.5971	0
A_23_P369237	ref|NM_004797|ref|NM_001177800|ens|ENST00000444204|ens|ENST00000320741	hs|chr3:186575311-186575370	0	ADIPOQ	NM_004797	ref|Homo sapiens adiponectin, C1Q and collagen domain containing (ADIPOQ), transcript variant 2, mRNA [NM_004797]	ADIPOQ	9370	0.00796314	1.00553	0.974281	0.998521	0	43.2559	43.4953	41.8138	44.7477	41.3066	45.8	0
A_23_P369237	ref|NM_004797|ref|NM_001177800|ens|ENST00000444204|ens|ENST00000320741	hs|chr3:186575311-186575370	0	ADIPOQ	NM_004797	ref|Homo sapiens adiponectin, C1Q and collagen domain containing (ADIPOQ), transcript variant 2, mRNA [NM_004797]	ADIPOQ	9370	-0.0294879	0.979768	0.904058	0.996521	0	42.69	41.8263	43.6829	41.7198	39.8631	43.8863	0
A_23_P369237	ref|NM_004797|ref|NM_001177800|ens|ENST00000444204|ens|ENST00000320741	hs|chr3:186575311-186575370	0	ADIPOQ	NM_004797	ref|Homo sapiens adiponectin, C1Q and collagen domain containing (ADIPOQ), transcript variant 2, mRNA [NM_004797]	ADIPOQ	9370	-0.0461649	0.968507	0.868423	0.994566	0	42.7335	41.3877	37.9675	48.0978	39.4734	43.3949	0
A_23_P369237	ref|NM_004797|ref|NM_001177800|ens|ENST00000444204|ens|ENST00000320741	hs|chr3:186575311-186575370	0	ADIPOQ	NM_004797	ref|Homo sapiens adiponectin, C1Q and collagen domain containing (ADIPOQ), transcript variant 2, mRNA [NM_004797]	ADIPOQ	9370	-0.0863342	0.941913	0.750642	0.9898	0	47.4078	44.654	43.0249	52.2372	42.1724	47.2816	0
A_23_P369237	ref|NM_004797|ref|NM_001177800|ens|ENST00000444204|ens|ENST00000320741	hs|chr3:186575311-186575370	0	ADIPOQ	NM_004797	ref|Homo sapiens adiponectin, C1Q and collagen domain containing (ADIPOQ), transcript variant 2, mRNA [NM_004797]	ADIPOQ	9370	-0.0924459	0.937931	0.712709	0.987258	0	41.3749	38.8068	38.9506	43.95	37.7777	39.8639	0
A_23_P369237	ref|NM_004797|ref|NM_001177800|ens|ENST00000444204|ens|ENST00000320741	hs|chr3:186575311-186575370	0	ADIPOQ	NM_004797	ref|Homo sapiens adiponectin, C1Q and collagen domain containing (ADIPOQ), transcript variant 2, mRNA [NM_004797]	ADIPOQ	9370	-0.215949	0.86098	0.508537	0.987258	0	47.7802	41.1378	40.0307	57.0299	42.9689	39.3847	0
A_23_P369237	ref|NM_004797|ref|NM_001177800|ens|ENST00000444204|ens|ENST00000320741	hs|chr3:186575311-186575370	0	ADIPOQ	NM_004797	ref|Homo sapiens adiponectin, C1Q and collagen domain containing (ADIPOQ), transcript variant 2, mRNA [NM_004797]	ADIPOQ	9370	-0.352467	0.783243	0.3532	0.987258	0	50.8573	39.8336	40.4455	63.9493	38.8289	40.8644	0
A_23_P46627	ref|NM_015999|ref|NM_001127687|ens|ENST00000436244|ens|ENST00000495562	hs|chr1:202910325-202910266	0	ADIPOR1	NM_015999	ref|Homo sapiens adiponectin receptor 1 (ADIPOR1), transcript variant 1, mRNA [NM_015999]	ADIPOR1	51094	-0.240333	0.84655	0.504209	0.987258	0	3861.77	3269.18	3132.15	4761.34	3037.23	3518.85	1
A_33_P3248765	ref|NM_015999|ref|NM_001127687|ens|ENST00000367254|ens|ENST00000426229	hs|chr1:202915627-202915568	0	ADIPOR1	NM_015999	ref|Homo sapiens adiponectin receptor 1 (ADIPOR1), transcript variant 1, mRNA [NM_015999]	ADIPOR1	51094	-0.384114	0.766249	0.405981	0.987258	0	485.599	372.09	372.671	632.745	310.155	446.392	1
A_23_P48121	ref|NM_024551|ens|ENST00000357103|gb|CR591974|gb|CR613880	hs|chr12:1897392-1897451	0	ADIPOR2	NM_024551	ref|Homo sapiens adiponectin receptor 2 (ADIPOR2), mRNA [NM_024551]	ADIPOR2	79602	0.607882	1.52402	0.247131	0.987258	0	1398.64	2131.56	1990.22	982.903	2027.19	2241.3	1
A_23_P112596	ref|NM_001123|ref|NM_006721|ens|ENST00000286621|ens|ENST00000372734	hs|chr10:76429970-76468080	0	ADK	NM_001123	ref|Homo sapiens adenosine kinase (ADK), transcript variant ADK-short, mRNA [NM_001123]	ADK	132	0.0498584	1.03516	0.882655	0.995574	0	2052.39	2124.56	1707.63	2466.76	1921.79	2348.72	1
A_23_P112596	ref|NM_001123|ref|NM_006721|ens|ENST00000286621|ens|ENST00000372734	hs|chr10:76429970-76468080	0	ADK	NM_001123	ref|Homo sapiens adenosine kinase (ADK), transcript variant ADK-short, mRNA [NM_001123]	ADK	132	0.0139484	1.00972	0.961487	0.997354	0	2346	2368.79	2090.8	2632.34	2171.18	2584.38	1
A_23_P112596	ref|NM_001123|ref|NM_006721|ens|ENST00000286621|ens|ENST00000372734	hs|chr10:76429970-76468080	0	ADK	NM_001123	ref|Homo sapiens adenosine kinase (ADK), transcript variant ADK-short, mRNA [NM_001123]	ADK	132	0.0120463	1.00838	0.966696	0.997724	0	2127.7	2145.54	1951.98	2319.24	1912.06	2407.53	1
A_23_P112596	ref|NM_001123|ref|NM_006721|ens|ENST00000286621|ens|ENST00000372734	hs|chr10:76429970-76468080	0	ADK	NM_001123	ref|Homo sapiens adenosine kinase (ADK), transcript variant ADK-short, mRNA [NM_001123]	ADK	132	0.000518051	1.00036	0.99862	0.999959	0	2450.8	2451.68	2133	2815.94	2264.56	2654.25	1
A_23_P112596	ref|NM_001123|ref|NM_006721|ens|ENST00000286621|ens|ENST00000372734	hs|chr10:76429970-76468080	0	ADK	NM_001123	ref|Homo sapiens adenosine kinase (ADK), transcript variant ADK-short, mRNA [NM_001123]	ADK	132	-0.00881591	0.993908	0.976717	0.998855	0	2110.19	2097.34	1921.79	2317.06	1833.67	2398.92	1
A_23_P112596	ref|NM_001123|ref|NM_006721|ens|ENST00000286621|ens|ENST00000372734	hs|chr10:76429970-76468080	0	ADK	NM_001123	ref|Homo sapiens adenosine kinase (ADK), transcript variant ADK-short, mRNA [NM_001123]	ADK	132	-0.0126696	0.991257	0.964083	0.997354	0	2421.02	2399.85	2162.47	2710.48	2238.49	2572.85	1
A_23_P112596	ref|NM_001123|ref|NM_006721|ens|ENST00000286621|ens|ENST00000372734	hs|chr10:76429970-76468080	0	ADK	NM_001123	ref|Homo sapiens adenosine kinase (ADK), transcript variant ADK-short, mRNA [NM_001123]	ADK	132	-0.034741	0.976207	0.907028	0.996521	0	2476.31	2417.39	2141.68	2863.22	2278.72	2564.49	1
A_23_P112596	ref|NM_001123|ref|NM_006721|ens|ENST00000286621|ens|ENST00000372734	hs|chr10:76429970-76468080	0	ADK	NM_001123	ref|Homo sapiens adenosine kinase (ADK), transcript variant ADK-short, mRNA [NM_001123]	ADK	132	-0.0381097	0.97393	0.89576	0.996482	0	2491.27	2426.32	2180.53	2846.29	2280.55	2581.41	1
A_23_P112596	ref|NM_001123|ref|NM_006721|ens|ENST00000286621|ens|ENST00000372734	hs|chr10:76429970-76468080	0	ADK	NM_001123	ref|Homo sapiens adenosine kinase (ADK), transcript variant ADK-short, mRNA [NM_001123]	ADK	132	-0.0437518	0.970129	0.885632	0.996059	0	2535.32	2459.59	2221.09	2894.01	2225.04	2718.86	1
A_23_P112596	ref|NM_001123|ref|NM_006721|ens|ENST00000286621|ens|ENST00000372734	hs|chr10:76429970-76468080	0	ADK	NM_001123	ref|Homo sapiens adenosine kinase (ADK), transcript variant ADK-short, mRNA [NM_001123]	ADK	132	-0.0710301	0.951958	0.802441	0.990458	0	2552	2429.39	2279.64	2856.89	2257.44	2614.45	1
A_23_P127948	ref|NM_001124|ens|ENST00000278175|gb|CR599806|gb|CR619368	hs|chr11:10328780-10328839	0	ADM	NM_001124	ref|Homo sapiens adrenomedullin (ADM), mRNA [NM_001124]	ADM	133	0.273945	1.20911	0.787493	0.989802	0	18863.4	22807.9	43994.7	8087.99	25926	20064.9	1
A_23_P127948	ref|NM_001124|ens|ENST00000278175|gb|CR599806|gb|CR619368	hs|chr11:10328780-10328839	0	ADM	NM_001124	ref|Homo sapiens adrenomedullin (ADM), mRNA [NM_001124]	ADM	133	0.238424	1.1797	0.820942	0.991737	0	21382.1	25224.5	51315.2	8909.5	29798.5	21352.6	1
A_23_P127948	ref|NM_001124|ens|ENST00000278175|gb|CR599806|gb|CR619368	hs|chr11:10328780-10328839	0	ADM	NM_001124	ref|Homo sapiens adrenomedullin (ADM), mRNA [NM_001124]	ADM	133	0.229247	1.17222	0.836403	0.99249	0	20543.5	24081.5	51914.6	8129.4	28513.7	20338.3	1
A_23_P127948	ref|NM_001124|ens|ENST00000278175|gb|CR599806|gb|CR619368	hs|chr11:10328780-10328839	0	ADM	NM_001124	ref|Homo sapiens adrenomedullin (ADM), mRNA [NM_001124]	ADM	133	0.226325	1.16985	0.828346	0.991737	0	19489.1	22799.3	46712.2	8131.16	25809.6	20140.2	1
A_23_P127948	ref|NM_001124|ens|ENST00000278175|gb|CR599806|gb|CR619368	hs|chr11:10328780-10328839	0	ADM	NM_001124	ref|Homo sapiens adrenomedullin (ADM), mRNA [NM_001124]	ADM	133	0.214983	1.16069	0.841406	0.992672	0	19885.2	23080.5	48842.8	8095.76	26752.1	19912.9	1
A_23_P127948	ref|NM_001124|ens|ENST00000278175|gb|CR599806|gb|CR619368	hs|chr11:10328780-10328839	0	ADM	NM_001124	ref|Homo sapiens adrenomedullin (ADM), mRNA [NM_001124]	ADM	133	0.207965	1.15506	0.850261	0.993192	0	22847.9	26390.6	57147.1	9134.77	31749.4	21936.3	1
A_23_P127948	ref|NM_001124|ens|ENST00000278175|gb|CR599806|gb|CR619368	hs|chr11:10328780-10328839	0	ADM	NM_001124	ref|Homo sapiens adrenomedullin (ADM), mRNA [NM_001124]	ADM	133	0.201208	1.14966	0.851603	0.993464	0	23788.8	27349	58466.3	9679.2	31854.4	23480.9	1
A_23_P127948	ref|NM_001124|ens|ENST00000278175|gb|CR599806|gb|CR619368	hs|chr11:10328780-10328839	0	ADM	NM_001124	ref|Homo sapiens adrenomedullin (ADM), mRNA [NM_001124]	ADM	133	0.194758	1.14453	0.857954	0.994553	0	22868.1	26173.2	56455.3	9263.05	31659.8	21637.5	1
A_23_P127948	ref|NM_001124|ens|ENST00000278175|gb|CR599806|gb|CR619368	hs|chr11:10328780-10328839	0	ADM	NM_001124	ref|Homo sapiens adrenomedullin (ADM), mRNA [NM_001124]	ADM	133	0.182187	1.1346	0.869457	0.994566	0	23330	26470.3	58961	9231.35	31283	22397.9	1
A_23_P127948	ref|NM_001124|ens|ENST00000278175|gb|CR599806|gb|CR619368	hs|chr11:10328780-10328839	0	ADM	NM_001124	ref|Homo sapiens adrenomedullin (ADM), mRNA [NM_001124]	ADM	133	0.173354	1.12768	0.873489	0.995047	0	23242.2	26209.7	57982.9	9316.54	30085.2	22833.4	1
A_33_P3413910	ref|NM_024866|ens|ENST00000395737|ens|ENST00000362068|ens|ENST00000395738	hs|chr22:50921310-50921369	0	ADM2	NM_024866	ref|Homo sapiens adrenomedullin 2 (ADM2), mRNA [NM_024866]	ADM2	79924	-1.16953	0.444566	0.285845	0.987258	0	436.457	194.034	187.027	1018.54	201.701	186.659	1
A_33_P3413905	ref|NM_024866|ens|ENST00000362068|ens|ENST00000395738|gb|FV073801	hs|chr22:50924807-50924866	0	ADM2	NM_024866	ref|Homo sapiens adrenomedullin 2 (ADM2), mRNA [NM_024866]	ADM2	79924	-1.35913	0.389817	0.0248189	0.987258	0	1212.78	472.762	966.142	1522.38	405.6	551.047	1
A_23_P254179	ref|NM_015339|ref|NM_181442|ens|ENST00000396032|gb|AF250860	hs|chr20:49507472-49507413	0	ADNP	NM_015339	ref|Homo sapiens activity-dependent neuroprotector homeobox (ADNP), transcript variant 1, mRNA [NM_015339]	ADNP	23394	0.782583	1.72021	0.400284	0.987258	0	1164.53	2003.24	2437.24	556.423	1943.45	2064.86	1
A_23_P164468	ref|NM_014913|ens|ENST00000262198|gb|AB020670|gb|AK023032	hs|chr18:77897118-77897177	0	ADNP2	NM_014913	ref|Homo sapiens ADNP homeobox 2 (ADNP2), mRNA [NM_014913]	ADNP2	22850	0.774155	1.71019	0.423179	0.987258	0	145.376	248.621	315.373	67.0136	249.09	248.152	1
A_23_P202345	ref|NM_032804|ens|ENST00000373783|gb|CR611168|gb|BC028589	hs|chr10:64567804-64567863	0	ADO	NM_032804	ref|Homo sapiens 2-aminoethanethiol (cysteamine) dioxygenase (ADO), mRNA [NM_032804]	ADO	84890	0.742861	1.67349	0.381332	0.987258	0	456.331	763.666	881.205	236.311	692.163	842.556	1
A_23_P74299	ref|NM_000674|ref|NM_001048230|ens|ENST00000367235|ens|ENST00000472535	hs|chr1:203135679-203135738	0	ADORA1	NM_000674	ref|Homo sapiens adenosine A1 receptor (ADORA1), transcript variant 1, mRNA [NM_000674]	ADORA1	134	-0.0805149	0.94572	0.878047	0.995389	0	74.0371	70.0184	102.977	53.2302	55.1384	88.9139	1
A_33_P3214035	ref|NM_000675|ens|ENST00000406084|ens|ENST00000436735|ens|ENST00000439591	hs|chr22:24829457-24829516	0	ADORA2A	NM_000675	ref|Homo sapiens adenosine A2a receptor (ADORA2A), mRNA [NM_000675]	ADORA2A	135	-0.880699	0.543104	0.273585	0.987258	0	75.367	40.9322	41.3066	137.513	43.0766	38.8945	1
A_24_P237270	ref|NM_000675|ens|ENST00000491194|ens|ENST00000358654|ens|ENST00000337539	hs|chr22:24837485-24837544	0	ADORA2A	NM_000675	ref|Homo sapiens adenosine A2a receptor (ADORA2A), mRNA [NM_000675]	ADORA2A	135	-1.21222	0.431605	0.217451	0.987258	0	129.001	55.6776	63.0086	264.112	64.1581	48.3181	1
A_23_P55477	ref|NM_000676|ens|ENST00000304222|gb|CR592809|gb|CR616920	hs|chr17:15878851-15878910	0	ADORA2B	NM_000676	ref|Homo sapiens adenosine A2b receptor (ADORA2B), mRNA [NM_000676]	ADORA2B	136	-1.4977	0.354116	0.0137644	0.987258	0	2131.7	754.87	2668.37	1702.97	705.632	807.545	1
A_23_P126540	ref|NM_020683|ref|NM_001081976|ens|ENST00000463993|ens|ENST00000442484	hs|chr1:112031418-112031359	0	ADORA3	NM_020683	ref|Homo sapiens adenosine A3 receptor (ADORA3), transcript variant 1, mRNA [NM_020683]	ADORA3	140	-0.0961123	0.935551	0.700878	0.987258	0	52.5552	49.168	53.1952	51.9229	46.223	52.3008	0
A_23_P137931	ref|NM_000677|ens|ENST00000241356|gb|AK313095|gb|AY136749	hs|chr1:112042789-112042730	0	ADORA3	NM_000677	ref|Homo sapiens adenosine A3 receptor (ADORA3), transcript variant 2, mRNA [NM_000677]	ADORA3	140	-0.122965	0.918298	0.628992	0.987258	0	39.9554	36.691	42.7301	37.3608	35.9379	37.4598	0
A_33_P3406927	ref|NM_031284|ref|NR_023319|ref|NR_023318|ens|ENST00000331065	hs|chr15:73045124-73045065	0	ADPGK	NM_031284	ref|Homo sapiens ADP-dependent glucokinase (ADPGK), transcript variant 1, mRNA [NM_031284]	ADPGK	83440	0.213085	1.15916	0.72965	0.989242	0	387.569	449.256	633.279	237.193	449.069	449.443	1
A_23_P14716	ref|NM_031284|ref|NR_023319|ref|NR_023318|ens|ENST00000311669	hs|chr15:73044246-73044187	0	ADPGK	NM_031284	ref|Homo sapiens ADP-dependent glucokinase (ADPGK), transcript variant 1, mRNA [NM_031284]	ADPGK	83440	0.117876	1.08514	0.803701	0.990671	0	1154.66	1252.96	1643.19	811.373	1314.02	1194.75	1
A_33_P3366053	ref|NM_001125|ens|ENST00000478399|ens|ENST00000357003|gb|BC020574	hs|chr3:119308728-119308787	0	ADPRH	NM_001125	ref|Homo sapiens ADP-ribosylarginine hydrolase (ADPRH), mRNA [NM_001125]	ADPRH	141	0.0259058	1.01812	0.98052	0.999346	0	121.436	123.636	79.6121	185.232	55.7413	274.23	1
A_23_P371145	ref|NM_138430|ref|NM_199162|ens|ENST00000375418|ens|ENST00000356501	hs|chr13:114077018-114076959	0	ADPRHL1	NM_138430	ref|Homo sapiens ADP-ribosylhydrolase like 1 (ADPRHL1), transcript variant 1, mRNA [NM_138430]	ADPRHL1	113622	-0.140831	0.906997	0.831163	0.992005	0	68.3629	62.0049	41.9299	111.46	49.8331	77.1497	1
A_23_P34568	ref|NM_017825|ens|ENST00000373178|gb|CR457237|gb|AK316349	hs|chr1:36558810-36558869	0	ADPRHL2	NM_017825	ref|Homo sapiens ADP-ribosylhydrolase like 2 (ADPRHL2), nuclear gene encoding mitochondrial protein, mRNA [NM_017825]	ADPRHL2	54936	-0.473194	0.720368	0.109793	0.987258	0	970.931	699.428	936.261	1006.88	699.508	699.348	1
A_23_P8938	ref|NM_033304|ref|NM_033302|ref|NM_000680|ref|NM_033303	hs|chr8:26628148-26628089	0	ADRA1A	NM_033304	ref|Homo sapiens adrenergic, alpha-1A-, receptor (ADRA1A), transcript variant 4, mRNA [NM_033304]	ADRA1A	148	0.0239251	1.01672	0.927822	0.99697	0	42.4938	43.2043	44.7713	40.332	47.1612	39.5794	0
A_33_P3332248	ens|ENST00000380573|gb|AK289548|gb|AK311558	hs|chr8:26723095-26723036	0	ADRA1A	ENST00000380573	ens|adrenergic, alpha-1A-, receptor [Source:HGNC Symbol;Acc:277] [ENST00000380573]	ADRA1A	148	-0.139688	0.907716	0.577363	0.987258	0	52.1201	47.3102	49.4958	54.8835	48.1364	46.4983	0
A_33_P3377194	ref|NM_033304|ref|NM_033302|ref|NM_000680|ref|NM_033303	hs|chr8:26721671-26721612	0	ADRA1A	NM_033304	ref|Homo sapiens adrenergic, alpha-1A-, receptor (ADRA1A), transcript variant 4, mRNA [NM_033304]	ADRA1A	148	-0.715587	0.608957	0.32953	0.987258	0	630.506	383.951	361.468	1099.79	391.276	376.763	1
A_23_P33326	ref|NM_000679	hs|chr5:159399943-159400002	0	ADRA1B	NM_000679	ref|Homo sapiens adrenergic, alpha-1B-, receptor (ADRA1B), mRNA [NM_000679]	ADRA1B	147	-2.19911	0.217773	0.0309228	0.987258	0	961.164	209.315	1572.56	587.474	274.1	159.843	1
A_33_P3243023	ref|NM_000678	hs|chr20:4201337-4201278	0	ADRA1D	NM_000678	ref|Homo sapiens adrenergic, alpha-1D-, receptor (ADRA1D), mRNA [NM_000678]	ADRA1D	146	0.269406	1.20531	0.496863	0.987258	0	50.6401	61.0371	57.4852	44.6101	48.5293	76.7687	0
A_23_P138706	ref|NM_000681|ens|ENST00000280155|gb|BC050414|gb|AF284095	hs|chr10:112840352-112840411	0	ADRA2A	NM_000681	ref|Homo sapiens adrenergic, alpha-2A-, receptor (ADRA2A), mRNA [NM_000681]	ADRA2A	150	0.943212	1.9228	0.437837	0.987258	0	101.36	194.895	94.6537	108.541	523.21	72.598	1
A_23_P378926	ref|NM_000682|ens|ENST00000409345|gb|BC133021|gb|BC136537	hs|chr2:96778961-96778902	0	ADRA2B	NM_000682	ref|Homo sapiens adrenergic, alpha-2B-, receptor (ADRA2B), mRNA [NM_000682]	ADRA2B	151	0.0787176	1.05608	0.761973	0.989802	0	40.765	43.0511	37.2636	44.5954	43.103	42.9991	0
A_23_P256158	ref|NM_000683|ens|ENST00000330055|gb|CR590957|gb|BC142625	hs|chr4:3770121-3770180	0	ADRA2C	NM_000683	ref|Homo sapiens adrenergic, alpha-2C-, receptor (ADRA2C), mRNA [NM_000683]	ADRA2C	152	0.443247	1.35966	0.639074	0.987258	0	194.834	264.908	97.9719	387.46	181.991	385.602	1
A_33_P3310189	ref|NM_000684|ens|ENST00000369295	hs|chr10:115806608-115806667	0	ADRB1	NM_000684	ref|Homo sapiens adrenergic, beta-1-, receptor (ADRB1), mRNA [NM_000684]	ADRB1	153	-0.202702	0.868922	0.420487	0.987258	0	41.0673	35.6843	41.9877	40.1671	36.4427	34.9417	0
A_23_P145024	ref|NM_000024|ens|ENST00000305988|gb|AK223025|gb|X04827	hs|chr5:148208080-148208139	0	ADRB2	NM_000024	ref|Homo sapiens adrenergic, beta-2-, receptor, surface (ADRB2), mRNA [NM_000024]	ADRB2	154	-0.617957	0.651593	0.609691	0.987258	0	351.161	228.814	875.138	140.908	355.074	147.451	1
A_23_P145024	ref|NM_000024|ens|ENST00000305988|gb|AK223025|gb|X04827	hs|chr5:148208080-148208139	0	ADRB2	NM_000024	ref|Homo sapiens adrenergic, beta-2-, receptor, surface (ADRB2), mRNA [NM_000024]	ADRB2	154	-0.643169	0.640305	0.607343	0.987258	0	302.934	193.97	807.176	113.691	281.916	133.46	1
A_23_P145024	ref|NM_000024|ens|ENST00000305988|gb|AK223025|gb|X04827	hs|chr5:148208080-148208139	0	ADRB2	NM_000024	ref|Homo sapiens adrenergic, beta-2-, receptor, surface (ADRB2), mRNA [NM_000024]	ADRB2	154	-0.667204	0.629726	0.585842	0.987258	0	334.761	210.808	846.544	132.379	324.104	137.116	1
A_23_P145024	ref|NM_000024|ens|ENST00000305988|gb|AK223025|gb|X04827	hs|chr5:148208080-148208139	0	ADRB2	NM_000024	ref|Homo sapiens adrenergic, beta-2-, receptor, surface (ADRB2), mRNA [NM_000024]	ADRB2	154	-0.699678	0.61571	0.545291	0.987258	0	356.385	219.43	831.381	152.77	343.464	140.187	1
A_23_P145024	ref|NM_000024|ens|ENST00000305988|gb|AK223025|gb|X04827	hs|chr5:148208080-148208139	0	ADRB2	NM_000024	ref|Homo sapiens adrenergic, beta-2-, receptor, surface (ADRB2), mRNA [NM_000024]	ADRB2	154	-0.705615	0.613181	0.509268	0.987258	0	323.17	198.162	722.116	144.629	281.334	139.578	1
A_23_P145024	ref|NM_000024|ens|ENST00000305988|gb|AK223025|gb|X04827	hs|chr5:148208080-148208139	0	ADRB2	NM_000024	ref|Homo sapiens adrenergic, beta-2-, receptor, surface (ADRB2), mRNA [NM_000024]	ADRB2	154	-0.74395	0.597102	0.483392	0.987258	0	334.058	199.467	735.415	151.744	285.253	139.48	1
A_23_P145024	ref|NM_000024|ens|ENST00000305988|gb|AK223025|gb|X04827	hs|chr5:148208080-148208139	0	ADRB2	NM_000024	ref|Homo sapiens adrenergic, beta-2-, receptor, surface (ADRB2), mRNA [NM_000024]	ADRB2	154	-0.772418	0.585436	0.491883	0.987258	0	372.838	218.273	865.633	160.586	317.196	150.201	1
A_23_P145024	ref|NM_000024|ens|ENST00000305988|gb|AK223025|gb|X04827	hs|chr5:148208080-148208139	0	ADRB2	NM_000024	ref|Homo sapiens adrenergic, beta-2-, receptor, surface (ADRB2), mRNA [NM_000024]	ADRB2	154	-0.805053	0.572341	0.48095	0.987258	0	370.986	212.331	877.27	156.885	306.405	147.14	1
A_23_P145024	ref|NM_000024|ens|ENST00000305988|gb|AK223025|gb|X04827	hs|chr5:148208080-148208139	0	ADRB2	NM_000024	ref|Homo sapiens adrenergic, beta-2-, receptor, surface (ADRB2), mRNA [NM_000024]	ADRB2	154	-0.858141	0.551663	0.411094	0.987258	0	405.7	223.81	853.579	192.826	329.428	152.053	1
A_23_P145024	ref|NM_000024|ens|ENST00000305988|gb|AK223025|gb|X04827	hs|chr5:148208080-148208139	0	ADRB2	NM_000024	ref|Homo sapiens adrenergic, beta-2-, receptor, surface (ADRB2), mRNA [NM_000024]	ADRB2	154	-0.904572	0.534191	0.405226	0.987258	0	393.684	210.302	857.808	180.678	312.272	141.63	1
A_23_P168993	ref|NM_000025|ens|ENST00000345060|gb|X70811	hs|chr8:37821117-37821058	0	ADRB3	NM_000025	ref|Homo sapiens adrenergic, beta-3-, receptor (ADRB3), mRNA [NM_000025]	ADRB3	155	-0.602709	0.658516	0.46147	0.987258	0	114.61	75.4728	59.9784	219.004	69.8983	81.4918	1
A_33_P3384392	ref|NM_001619|ens|ENST00000308595|ens|ENST00000416281|gb|CR616194	hs|chr11:67053947-67054006	0	ADRBK1	NM_001619	ref|Homo sapiens adrenergic, beta, receptor kinase 1 (ADRBK1), mRNA [NM_001619]	ADRBK1	156	0.309722	1.23947	0.499183	0.987258	0	3005.92	3725.74	2841.27	3180.1	5135.38	2703.04	1
A_33_P3220919	ref|NM_005160|gb|AK123767|gb|AK055687|gb|BC029563	hs|chr22:26125179-26125238	0	ADRBK2	NM_005160	ref|Homo sapiens adrenergic, beta, receptor kinase 2 (ADRBK2), mRNA [NM_005160]	ADRBK2	157	1.1861	2.27537	0.107137	0.987258	0	233.581	531.484	371.151	147.002	594.867	474.854	1
A_23_P68665	ref|NM_007002|ref|NM_175573|ens|ENST00000423787|ens|ENST00000370744	hs|chr20:60883102-60883161	0	ADRM1	NM_007002	ref|Homo sapiens adhesion regulating molecule 1 (ADRM1), transcript variant 1, mRNA [NM_007002]	ADRM1	11047	-0.274723	0.826609	0.559265	0.987258	0	2325	1921.86	1716.06	3150.02	1641.99	2249.45	1
A_23_P155103	ref|NM_000026|ref|NM_001123378|ens|ENST00000480775|ens|ENST00000454266	hs|chr22:40755270-40756424	0	ADSL	NM_000026	ref|Homo sapiens adenylosuccinate lyase (ADSL), transcript variant 1, mRNA [NM_000026]	ADSL	158	-0.0487184	0.966795	0.924826	0.99697	0	2655.84	2567.65	1781.45	3959.39	2613.92	2522.19	1
A_23_P201432	ref|NM_001126|ens|ENST00000366535|ens|ENST00000449326|gb|CR620791	hs|chr1:244572746-244572687	0	ADSS	NM_001126	ref|Homo sapiens adenylosuccinate synthase (ADSS), mRNA [NM_001126]	ADSS	159	0.533329	1.44727	0.364043	0.987258	0	1454.83	2105.52	2244.33	943.051	2122.02	2089.15	1
A_23_P76823	ref|NM_199165|ref|NM_152328|ens|ENST00000332972|ens|ENST00000330877	hs|chr14:105213294-105213353	0	ADSSL1	NM_199165	ref|Homo sapiens adenylosuccinate synthase like 1 (ADSSL1), transcript variant 1, mRNA [NM_199165]	ADSSL1	122622	-0.0882791	0.940644	0.923001	0.99697	0	759.146	714.087	487.019	1183.33	1337.14	381.35	1
A_23_P157299	ref|NM_001129|ens|ENST00000413907|ens|ENST00000223357|gb|CR598691	hs|chr7:44153822-44153881	0	AEBP1	NM_001129	ref|Homo sapiens AE binding protein 1 (AEBP1), mRNA [NM_001129]	AEBP1	165	3.10763	8.61968	0.174723	0.987258	0	1259.24	10854.3	232.358	6824.33	14034.4	8394.76	1
A_24_P18621	ref|NM_153207|ref|NM_001114176|ens|ENST00000266508|ens|ENST00000398864	hs|chr12:19672916-19672975	0	AEBP2	NM_153207	ref|Homo sapiens AE binding protein 2 (AEBP2), transcript variant 1, mRNA [NM_153207]	AEBP2	121536	0.621211	1.53817	0.380693	0.987258	0	970.719	1493.13	1649.92	571.116	1683.57	1324.23	1
A_33_P3214501	ref|NM_022767|ens|ENST00000379231|ens|ENST00000332810|gb|AB209323	hs|chr15:89174348-89174407	0	AEN	NM_022767	ref|Homo sapiens apoptosis enhancing nuclease (AEN), mRNA [NM_022767]	AEN	64782	0.148861	1.10869	0.737043	0.9898	0	425.624	471.887	545.348	332.184	383.685	580.365	1
A_23_P206077	ref|NM_022767|ens|ENST00000332810|gb|AB209323|gb|AK022546	hs|chr15:89174900-89174959	0	AEN	NM_022767	ref|Homo sapiens apoptosis enhancing nuclease (AEN), mRNA [NM_022767]	AEN	64782	0.0543248	1.03837	0.896884	0.996521	0	1200.59	1246.67	1606.66	897.159	1155.49	1345.04	1
A_23_P165061	ref|NM_198969|ref|NM_001130|ref|NM_198970|ens|ENST00000221561	hs|chr19:3053028-3052969	0	AES	NM_198969	ref|Homo sapiens amino-terminal enhancer of split (AES), transcript variant 1, mRNA [NM_198969]	AES	166	0.066956	1.0475	0.811426	0.991367	0	25934.8	27166.8	26275.5	25598.5	30904.7	23881	1
A_23_P72387	ref|NM_001134647|ref|NM_198595|ens|ENST00000420658|ens|ENST00000358461	hs|chr4:7760626-7760567	0	AFAP1	NM_001134647	ref|Homo sapiens actin filament associated protein 1 (AFAP1), transcript variant a, mRNA [NM_001134647]	AFAP1	60312	0.761281	1.695	0.194084	0.987258	0	628.138	1064.69	829.95	475.399	803.445	1410.88	1
A_23_P110276	ref|NR_026892|gb|BC004397	hs|chr4:7779901-7779960	0	AFAP1-AS1	NR_026892	ref|Homo sapiens AFAP1 antisense RNA 1 (non-protein coding) (AFAP1-AS1), antisense RNA [NR_026892]	AFAP1-AS1	84740	0.758334	1.69154	0.236841	0.987258	0	37.1996	62.9245	36.926	37.4752	99.2244	39.9044	0
A_23_P110276	ref|NR_026892|gb|BC004397	hs|chr4:7779901-7779960	0	AFAP1-AS1	NR_026892	ref|Homo sapiens AFAP1 antisense RNA 1 (non-protein coding) (AFAP1-AS1), antisense RNA [NR_026892]	AFAP1-AS1	84740	0.224868	1.16867	0.374277	0.987258	0	36.3695	42.504	37.017	35.7333	41.9729	43.0417	0
A_23_P110276	ref|NR_026892|gb|BC004397	hs|chr4:7779901-7779960	0	AFAP1-AS1	NR_026892	ref|Homo sapiens AFAP1 antisense RNA 1 (non-protein coding) (AFAP1-AS1), antisense RNA [NR_026892]	AFAP1-AS1	84740	0.123056	1.08904	0.626998	0.987258	0	36.9284	40.2165	38.635	35.2972	38.2942	42.2352	0
A_23_P110276	ref|NR_026892|gb|BC004397	hs|chr4:7779901-7779960	0	AFAP1-AS1	NR_026892	ref|Homo sapiens AFAP1 antisense RNA 1 (non-protein coding) (AFAP1-AS1), antisense RNA [NR_026892]	AFAP1-AS1	84740	0.0938003	1.06718	0.726461	0.98861	0	36.5041	38.9564	39.5259	33.7134	36.3631	41.7347	0
A_23_P110276	ref|NR_026892|gb|BC004397	hs|chr4:7779901-7779960	0	AFAP1-AS1	NR_026892	ref|Homo sapiens AFAP1 antisense RNA 1 (non-protein coding) (AFAP1-AS1), antisense RNA [NR_026892]	AFAP1-AS1	84740	0.0756407	1.05383	0.760567	0.989802	0	39.8537	41.999	41.138	38.6094	44.2002	39.9074	0
A_23_P110276	ref|NR_026892|gb|BC004397	hs|chr4:7779901-7779960	0	AFAP1-AS1	NR_026892	ref|Homo sapiens AFAP1 antisense RNA 1 (non-protein coding) (AFAP1-AS1), antisense RNA [NR_026892]	AFAP1-AS1	84740	0.0705896	1.05015	0.787979	0.989802	0	36.0717	37.8806	38.147	34.1093	40.9595	35.0331	0
A_23_P110276	ref|NR_026892|gb|BC004397	hs|chr4:7779901-7779960	0	AFAP1-AS1	NR_026892	ref|Homo sapiens AFAP1 antisense RNA 1 (non-protein coding) (AFAP1-AS1), antisense RNA [NR_026892]	AFAP1-AS1	84740	-0.0267243	0.981647	0.924089	0.99697	0	41.9893	41.2186	41.3552	42.6331	46.9456	36.1903	0
A_23_P110276	ref|NR_026892|gb|BC004397	hs|chr4:7779901-7779960	0	AFAP1-AS1	NR_026892	ref|Homo sapiens AFAP1 antisense RNA 1 (non-protein coding) (AFAP1-AS1), antisense RNA [NR_026892]	AFAP1-AS1	84740	-0.0386887	0.973539	0.882019	0.995574	0	41.486	40.3882	38.0189	45.2692	41.8789	38.9506	0
A_23_P110276	ref|NR_026892|gb|BC004397	hs|chr4:7779901-7779960	0	AFAP1-AS1	NR_026892	ref|Homo sapiens AFAP1 antisense RNA 1 (non-protein coding) (AFAP1-AS1), antisense RNA [NR_026892]	AFAP1-AS1	84740	-0.0397615	0.972816	0.882969	0.995574	0	38.2164	37.1775	41.581	35.124	34.4971	40.0662	0
A_23_P110276	ref|NR_026892|gb|BC004397	hs|chr4:7779901-7779960	0	AFAP1-AS1	NR_026892	ref|Homo sapiens AFAP1 antisense RNA 1 (non-protein coding) (AFAP1-AS1), antisense RNA [NR_026892]	AFAP1-AS1	84740	-0.158182	0.896153	0.538226	0.987258	0	39.9892	35.8365	38.7049	41.3161	38.0898	33.7164	0
A_32_P167239	ref|NM_152406|ref|NM_001146337|ens|ENST00000296721|ens|ENST00000394338	hs|chr5:148720325-148720384	0	AFAP1L1	NM_152406	ref|Homo sapiens actin filament associated protein 1-like 1 (AFAP1L1), transcript variant 1, mRNA [NM_152406]	AFAP1L1	134265	-0.176984	0.88455	0.648128	0.987258	0	667.452	590.394	538.554	827.199	508.857	684.997	1
A_23_P406341	ref|NM_001001936|ref|NM_032550|ens|ENST00000392974|ens|ENST00000491814	hs|chr10:116055189-116055130	0	AFAP1L2	NM_001001936	ref|Homo sapiens actin filament associated protein 1-like 2 (AFAP1L2), transcript variant 1, mRNA [NM_001001936]	AFAP1L2	84632	0.241565	1.18227	0.618281	0.987258	0	44.2171	52.2768	35.6992	54.7674	39.1547	69.7966	0
A_24_P414332	ref|NM_005935|ref|NM_001166693|ens|ENST00000307808|gb|L13773	hs|chr4:88061248-88061307	0	AFF1	NM_005935	ref|Homo sapiens AF4/FMR2 family, member 1 (AFF1), transcript variant 2, mRNA [NM_005935]	AFF1	4299	1.32786	2.5103	0.381377	0.987258	0	170.8	428.759	582.159	50.1111	400.688	458.797	1
A_33_P3242373	ref|NM_005935|ref|NM_001166693|ens|ENST00000503369|ens|ENST00000395146	hs|chr4:88036391-88036450	0	AFF1	NM_005935	ref|Homo sapiens AF4/FMR2 family, member 1 (AFF1), transcript variant 2, mRNA [NM_005935]	AFF1	4299	0.196214	1.14569	0.791821	0.98998	0	214.892	246.199	390.413	118.281	216.558	279.898	1
A_33_P3242383	ens|ENST00000317423|ens|ENST00000504956|gb|AK296149	hs|chr4:87968749-87968808	0	ENST00000317423	ENST00000317423	ens|AF4/FMR2 family, member 1 [Source:HGNC Symbol;Acc:7135] [ENST00000317423]	AFF1	4299	0.1112	1.08013	0.750122	0.9898	0	44.7528	48.3387	52.2554	38.3275	56.556	41.3154	0
A_33_P3293888	ref|NM_002025|ref|NM_001169123|ref|NM_001169122|ref|NM_001169124	hs|chrX:148072802-148072861	0	AFF2	NM_002025	ref|Homo sapiens AF4/FMR2 family, member 2 (AFF2), transcript variant 1, mRNA [NM_002025]	AFF2	2334	0.192641	1.14285	0.439376	0.987258	0	35.5807	40.6636	35.7605	35.4019	39.8609	41.4824	0
A_23_P217468	ref|NM_002025|ref|NM_001169123|ref|NM_001169122|ref|NM_001169124	hs|chrX:148081902-148081961	0	AFF2	NM_002025	ref|Homo sapiens AF4/FMR2 family, member 2 (AFF2), transcript variant 1, mRNA [NM_002025]	AFF2	2334	0.0986752	1.07079	0.690758	0.987258	0	31.8784	34.1351	32.227	31.5336	32.326	36.0454	0
A_33_P3293903	ens|ENST00000370458|gb|X95463	hs|chrX:147985831-147985890	0	ENST00000370458	ENST00000370458	ens|AF4/FMR2 family, member 2 [Source:HGNC Symbol;Acc:3776] [ENST00000370458]	AFF2	2334	-0.0346341	0.976279	0.888542	0.996443	0	37.9158	37.0164	39.9767	35.9611	38.1617	35.9055	0
A_23_P373464	ref|NM_002285|ref|NM_001025108|ens|ENST00000409236|ens|ENST00000317233	hs|chr2:100163726-100163700	0	AFF3	NM_002285	ref|Homo sapiens AF4/FMR2 family, member 3 (AFF3), transcript variant 1, mRNA [NM_002285]	AFF3	3899	0.605013	1.52099	0.235718	0.987258	0	41.5753	63.2358	42.4407	40.7276	88.7967	45.0328	0
A_24_P286079	ref|NM_014423|ens|ENST00000265343|gb|AK126818|gb|AF173886	hs|chr5:132211793-132211734	0	AFF4	NM_014423	ref|Homo sapiens AF4/FMR2 family, member 4 (AFF4), mRNA [NM_014423]	AFF4	27125	1.97449	3.92989	0.364521	0.987258	0	464.584	1825.76	2700.28	79.9317	1549.17	2151.74	1
A_24_P8318	ref|NM_014423|ens|ENST00000491831|ens|ENST00000465484|ens|ENST00000265343	hs|chr5:132270181-132270122	0	AFF4	NM_014423	ref|Homo sapiens AF4/FMR2 family, member 4 (AFF4), mRNA [NM_014423]	AFF4	27125	0.482592	1.39725	0.639714	0.987258	0	375.412	524.546	865.93	162.755	429.727	640.286	1
A_23_P355289	ref|NR_003226|ref|NR_003227|ens|ENST00000427658|ens|ENST00000437774	hs|chr16:90062393-90062452	0	AFG3L1P	NR_003226	ref|Homo sapiens AFG3 ATPase family gene 3-like 1 (S. cerevisiae), pseudogene (AFG3L1P), transcript variant 1, non-coding RNA [NR_003226]	AFG3L1P	172	0.407763	1.32663	0.33985	0.987258	0	1252.25	1661.26	1596.43	982.267	1904.59	1449.03	1
A_33_P3283984	ref|NR_003228|ens|ENST00000388970|ens|ENST00000355531|gb|AF329691	hs|chr16:90055299-90055358	0	AFG3L1P	NR_003228	ref|Homo sapiens AFG3 ATPase family gene 3-like 1 (S. cerevisiae), pseudogene (AFG3L1P), transcript variant 3, non-coding RNA [NR_003228]	AFG3L1P	172	-0.0849843	0.942795	0.767856	0.989802	0	45.1184	42.5374	50.2884	40.48	46.4764	38.9323	0
A_33_P3329793	ref|NR_003228|ens|ENST00000355531|ens|ENST00000388970|gb|AF329691	hs|chr16:90066550-90066609	0	AFG3L1P	NR_003228	ref|Homo sapiens AFG3 ATPase family gene 3-like 1 (S. cerevisiae), pseudogene (AFG3L1P), transcript variant 3, non-coding RNA [NR_003228]	AFG3L1P	172	-0.876657	0.544628	0.330462	0.987258	0	99.4894	54.1847	49.4674	200.094	55.4222	52.9749	1
A_23_P135454	ref|NM_006796|ens|ENST00000269143|gb|Y18314|gb|CR597170	hs|chr18:12340314-12340255	0	AFG3L2	NM_006796	ref|Homo sapiens AFG3 ATPase family gene 3-like 2 (S. cerevisiae) (AFG3L2), nuclear gene encoding mitochondrial protein, mRNA [NM_006796]	AFG3L2	10939	0.571844	1.48642	0.247336	0.987258	0	350.017	520.273	485.854	252.157	515.87	524.712	1
A_33_P3303444	ref|NM_001133|ens|ENST00000226355|gb|BC109020|gb|BC109021	hs|chr4:74367576-74367635	0	AFM	NM_001133	ref|Homo sapiens afamin (AFM), mRNA [NM_001133]	AFM	173	0.154938	1.11337	0.531996	0.987258	0	37.2286	41.4494	38.6104	35.8963	41.0604	41.8421	0
A_24_P33156	ref|NM_001010982|ref|NM_001145526|ens|ENST00000473128|ens|ENST00000458315	hs|chr17:76202053-76202112	0	AFMID	NM_001010982	ref|Homo sapiens arylformamidase (AFMID), transcript variant 1, mRNA [NM_001010982]	AFMID	125061	-0.182475	0.88119	0.647495	0.987258	0	151.63	133.615	116.198	197.868	142.114	125.625	1
A_24_P867342	ref|NR_027083|gb|BC020920|ens|ENST00000409431	hs|chr17:76187125-76193269	0	AFMID	NR_027083	ref|Homo sapiens arylformamidase (AFMID), transcript variant 3, non-coding RNA [NR_027083]	AFMID	125061	-0.365967	0.775948	0.219712	0.987258	0	57.5321	44.642	53.8397	61.4778	41.2583	48.3032	0
A_33_P3215999	ref|NM_001010982|ref|NM_001145526|ens|ENST00000458315|ens|ENST00000476610	hs|chr17:76203143-76203202	0	AFMID	NM_001010982	ref|Homo sapiens arylformamidase (AFMID), transcript variant 1, mRNA [NM_001010982]	AFMID	125061	-0.923571	0.527202	0.405271	0.987258	0	671.532	354.033	275.146	1638.97	342.472	365.984	1
A_33_P3421243	ref|NM_001134|ens|ENST00000508838|ens|ENST00000506820|ens|ENST00000395792	hs|chr4:74321349-74321408	0	AFP	NM_001134	ref|Homo sapiens alpha-fetoprotein (AFP), mRNA [NM_001134]	AFP	174	-0.640023	0.641703	0.72537	0.988546	0	231.026	148.25	83.6883	637.758	45.3815	484.294	1
A_23_P102542	ref|NM_203437|ref|NM_017657|ref|NM_001002243|ens|ENST00000422803	hs|chr2:64819947-64820006	0	AFTPH	NM_203437	ref|Homo sapiens aftiphilin (AFTPH), transcript variant 1, mRNA [NM_203437]	AFTPH	54812	0.603105	1.51898	0.511007	0.987258	0	673.365	1022.83	1418.62	319.621	1045.79	1000.38	1
A_23_P102542	ref|NM_203437|ref|NM_017657|ref|NM_001002243|ens|ENST00000422803	hs|chr2:64819947-64820006	0	AFTPH	NM_203437	ref|Homo sapiens aftiphilin (AFTPH), transcript variant 1, mRNA [NM_203437]	AFTPH	54812	0.538487	1.45245	0.499774	0.987258	0	784.395	1139.29	1485.5	414.186	1162.91	1116.16	1
A_23_P102542	ref|NM_203437|ref|NM_017657|ref|NM_001002243|ens|ENST00000422803	hs|chr2:64819947-64820006	0	AFTPH	NM_203437	ref|Homo sapiens aftiphilin (AFTPH), transcript variant 1, mRNA [NM_203437]	AFTPH	54812	0.523237	1.43718	0.55698	0.987258	0	782.628	1124.77	1619.73	378.154	1113.1	1136.57	1
A_23_P102542	ref|NM_203437|ref|NM_017657|ref|NM_001002243|ens|ENST00000422803	hs|chr2:64819947-64820006	0	AFTPH	NM_203437	ref|Homo sapiens aftiphilin (AFTPH), transcript variant 1, mRNA [NM_203437]	AFTPH	54812	0.514867	1.42886	0.572497	0.987258	0	660.091	943.18	1394.56	312.443	944.82	941.543	1
A_23_P102542	ref|NM_203437|ref|NM_017657|ref|NM_001002243|ens|ENST00000422803	hs|chr2:64819947-64820006	0	AFTPH	NM_203437	ref|Homo sapiens aftiphilin (AFTPH), transcript variant 1, mRNA [NM_203437]	AFTPH	54812	0.482306	1.39698	0.562497	0.987258	0	778.591	1087.67	1530.29	396.136	1125.92	1050.72	1
A_23_P102542	ref|NM_203437|ref|NM_017657|ref|NM_001002243|ens|ENST00000422803	hs|chr2:64819947-64820006	0	AFTPH	NM_203437	ref|Homo sapiens aftiphilin (AFTPH), transcript variant 1, mRNA [NM_203437]	AFTPH	54812	0.47013	1.38523	0.586441	0.987258	0	751.82	1041.45	1523.82	370.932	1018.96	1064.43	1
A_23_P428382	ref|NM_203437|ref|NM_001002243|ref|NM_017657|ens|ENST00000487769	hs|chr2:64812605-64812664	0	AFTPH	NM_203437	ref|Homo sapiens aftiphilin (AFTPH), transcript variant 1, mRNA [NM_203437]	AFTPH	54812	0.458103	1.37373	0.558552	0.987258	0	948.585	1303.1	1782.36	504.843	1355.79	1252.47	1
A_23_P102542	ref|NM_203437|ref|NM_017657|ref|NM_001002243|ens|ENST00000422803	hs|chr2:64819947-64820006	0	AFTPH	NM_203437	ref|Homo sapiens aftiphilin (AFTPH), transcript variant 1, mRNA [NM_203437]	AFTPH	54812	0.448527	1.36465	0.613133	0.987258	0	733.656	1001.18	1510.99	356.224	904.477	1108.22	1
A_23_P102542	ref|NM_203437|ref|NM_017657|ref|NM_001002243|ens|ENST00000422803	hs|chr2:64819947-64820006	0	AFTPH	NM_203437	ref|Homo sapiens aftiphilin (AFTPH), transcript variant 1, mRNA [NM_203437]	AFTPH	54812	0.43597	1.35282	0.597384	0.987258	0	831.981	1125.52	1630.7	424.476	1101.1	1150.49	1
A_23_P102542	ref|NM_203437|ref|NM_017657|ref|NM_001002243|ens|ENST00000422803	hs|chr2:64819947-64820006	0	AFTPH	NM_203437	ref|Homo sapiens aftiphilin (AFTPH), transcript variant 1, mRNA [NM_203437]	AFTPH	54812	0.409904	1.3286	0.60613	0.987258	0	832.479	1106.03	1589.6	435.973	1107.46	1104.6	1
A_23_P102542	ref|NM_203437|ref|NM_017657|ref|NM_001002243|ens|ENST00000422803	hs|chr2:64819947-64820006	0	AFTPH	NM_203437	ref|Homo sapiens aftiphilin (AFTPH), transcript variant 1, mRNA [NM_203437]	AFTPH	54812	0.309267	1.23908	0.666336	0.987258	0	906.691	1123.46	1620.51	507.301	1136.57	1110.5	1
A_23_P7099	ref|NM_000027|ref|NM_001171988|ref|NR_033655|ens|ENST00000264595	hs|chr4:178354452-178354393	0	AGA	NM_000027	ref|Homo sapiens aspartylglucosaminidase (AGA), transcript variant 1, mRNA [NM_000027]	AGA	175	-0.307365	0.808116	0.510588	0.987258	0	2256.9	1823.84	1944.64	2619.31	2463.35	1350.36	1
A_23_P108404	ref|NM_001037131|ref|NM_014914|gb|AY033765|gb|AK001722	hs|chr2:237033264-237033323	0	AGAP1	NM_001037131	ref|Homo sapiens ArfGAP with GTPase domain, ankyrin repeat and PH domain 1 (AGAP1), transcript variant 1, mRNA [NM_001037131]	AGAP1	116987	1.02577	2.03604	0.323246	0.987258	0	143.175	291.509	321.799	63.7012	272.934	311.348	1
A_23_P108404	ref|NM_001037131|ref|NM_014914|gb|AY033765|gb|AK001722	hs|chr2:237033264-237033323	0	AGAP1	NM_001037131	ref|Homo sapiens ArfGAP with GTPase domain, ankyrin repeat and PH domain 1 (AGAP1), transcript variant 1, mRNA [NM_001037131]	AGAP1	116987	0.871268	1.82927	0.377438	0.987258	0	145.449	266.065	314.065	67.3598	230.744	306.794	1
A_23_P108404	ref|NM_001037131|ref|NM_014914|gb|AY033765|gb|AK001722	hs|chr2:237033264-237033323	0	AGAP1	NM_001037131	ref|Homo sapiens ArfGAP with GTPase domain, ankyrin repeat and PH domain 1 (AGAP1), transcript variant 1, mRNA [NM_001037131]	AGAP1	116987	0.808328	1.75118	0.363445	0.987258	0	152.033	266.237	302.831	76.3263	240.047	295.285	1
A_23_P108404	ref|NM_001037131|ref|NM_014914|gb|AY033765|gb|AK001722	hs|chr2:237033264-237033323	0	AGAP1	NM_001037131	ref|Homo sapiens ArfGAP with GTPase domain, ankyrin repeat and PH domain 1 (AGAP1), transcript variant 1, mRNA [NM_001037131]	AGAP1	116987	0.7561	1.68892	0.323372	0.987258	0	179.772	303.62	320.031	100.984	279.423	329.912	1
A_23_P108404	ref|NM_001037131|ref|NM_014914|gb|AY033765|gb|AK001722	hs|chr2:237033264-237033323	0	AGAP1	NM_001037131	ref|Homo sapiens ArfGAP with GTPase domain, ankyrin repeat and PH domain 1 (AGAP1), transcript variant 1, mRNA [NM_001037131]	AGAP1	116987	0.701075	1.62572	0.261006	0.987258	0	202.924	329.896	316.939	129.924	338.381	321.623	1
A_23_P108404	ref|NM_001037131|ref|NM_014914|gb|AY033765|gb|AK001722	hs|chr2:237033264-237033323	0	AGAP1	NM_001037131	ref|Homo sapiens ArfGAP with GTPase domain, ankyrin repeat and PH domain 1 (AGAP1), transcript variant 1, mRNA [NM_001037131]	AGAP1	116987	0.687462	1.61045	0.388991	0.987258	0	178.046	286.735	328.907	96.3815	257.385	319.431	1
A_23_P108404	ref|NM_001037131|ref|NM_014914|gb|AY033765|gb|AK001722	hs|chr2:237033264-237033323	0	AGAP1	NM_001037131	ref|Homo sapiens ArfGAP with GTPase domain, ankyrin repeat and PH domain 1 (AGAP1), transcript variant 1, mRNA [NM_001037131]	AGAP1	116987	0.501704	1.41588	0.392387	0.987258	0	198.232	280.674	303.741	129.374	255.901	307.845	1
A_23_P108404	ref|NM_001037131|ref|NM_014914|gb|AY033765|gb|AK001722	hs|chr2:237033264-237033323	0	AGAP1	NM_001037131	ref|Homo sapiens ArfGAP with GTPase domain, ankyrin repeat and PH domain 1 (AGAP1), transcript variant 1, mRNA [NM_001037131]	AGAP1	116987	0.421313	1.33915	0.469988	0.987258	0	205.574	275.294	314.558	134.349	243.807	310.847	1
A_23_P108404	ref|NM_001037131|ref|NM_014914|gb|AY033765|gb|AK001722	hs|chr2:237033264-237033323	0	AGAP1	NM_001037131	ref|Homo sapiens ArfGAP with GTPase domain, ankyrin repeat and PH domain 1 (AGAP1), transcript variant 1, mRNA [NM_001037131]	AGAP1	116987	0.335833	1.26211	0.496877	0.987258	0	241.306	304.553	342.472	170.024	279	332.447	1
A_23_P108404	ref|NM_001037131|ref|NM_014914|gb|AY033765|gb|AK001722	hs|chr2:237033264-237033323	0	AGAP1	NM_001037131	ref|Homo sapiens ArfGAP with GTPase domain, ankyrin repeat and PH domain 1 (AGAP1), transcript variant 1, mRNA [NM_001037131]	AGAP1	116987	0.251517	1.19046	0.579895	0.987258	0	234.981	279.735	318.351	173.444	247.614	316.023	1
A_33_P3317305	ref|NM_014914|ref|NM_001037131|ens|ENST00000336665|ens|ENST00000304032	hs|chr2:236706430-236706489	0	AGAP1	NM_014914	ref|Homo sapiens ArfGAP with GTPase domain, ankyrin repeat and PH domain 1 (AGAP1), transcript variant 2, mRNA [NM_014914]	AGAP1	116987	0.0349455	1.02452	0.889512	0.996482	0	93.5156	95.8084	95.301	91.7636	89.238	102.863	1
A_33_P3375435	ref|NM_133447|ref|NM_014753|ref|NR_033857|ref|NR_026592	hs|chr10:081666393-081666452	0	AGAP11	NM_133447	ref|Homo sapiens ankyrin repeat and GTPase domain Arf GTPase activating protein 11 (AGAP11), mRNA [NM_133447]	AGAP11	119385	0.162978	1.1196	0.77754	0.989802	0	149.91	167.839	227.702	98.6946	201.012	140.14	1
A_33_P3352148	ref|NM_001122772|ref|NM_014770|ens|ENST00000328568|ens|ENST00000257897	hs|chr12:58119125-58119066	0	AGAP2	NM_001122772	ref|Homo sapiens ArfGAP with GTPase domain, ankyrin repeat and PH domain 2 (AGAP2), transcript variant 1, mRNA [NM_001122772]	AGAP2	116986	-0.570294	0.67348	0.200589	0.987258	0	69.139	46.5637	53.0596	90.0912	49.4125	43.8792	0
A_23_P111452	ref|NM_031946|ens|ENST00000473633|ens|ENST00000397238|ens|ENST00000335355	hs|chr7:150841434-150841493	0	AGAP3	NM_031946	ref|Homo sapiens ArfGAP with GTPase domain, ankyrin repeat and PH domain 3 (AGAP3), transcript variant 1, mRNA [NM_031946]	AGAP3	116988	-0.0840977	0.943374	0.823109	0.991737	0	3945	3721.61	5066.56	3071.7	3872.48	3576.61	1
A_33_P3240543	ref|NM_001042535|ens|ENST00000473312|gb|AK091771|gb|AX747175	hs|chr7:150820665-150820724	0	AGAP3	NM_001042535	ref|Homo sapiens ArfGAP with GTPase domain, ankyrin repeat and PH domain 3 (AGAP3), transcript variant 2, mRNA [NM_001042535]	AGAP3	116988	-0.445352	0.734405	0.185835	0.987258	0	6656.8	4888.79	5941.72	7457.95	5392.11	4432.45	1
A_24_P729905	ref|NM_001077685|ref|NM_001190810|ref|NM_001077686|ref|NM_001077665	hs|chr10:51483236-51483177	0	AGAP7	NM_001077685	ref|Homo sapiens ArfGAP with GTPase domain, ankyrin repeat and PH domain 7 (AGAP7), mRNA [NM_001077685]	AGAP7	653268	0.227239	1.17059	0.786403	0.989802	0	388.298	454.538	744.822	202.431	582.544	354.66	1
A_32_P230196	ref|NM_001077685|ref|NM_001190810|ref|NM_133447|ref|NM_001077686	hs|chr10:51464344-51464285	0	AGAP7	NM_001077685	ref|Homo sapiens ArfGAP with GTPase domain, ankyrin repeat and PH domain 7 (AGAP7), mRNA [NM_001077685]	AGAP7	653268	0.182023	1.13447	0.814211	0.991733	0	69.5625	78.9168	125.311	38.6153	101.459	61.3831	1
A_32_P41526	ref|NM_001077685|ref|NM_001144000|ref|NM_001190810|ref|NM_001077686	hs|chr10:51465313-51465254	0	AGAP7	NM_001077685	ref|Homo sapiens ArfGAP with GTPase domain, ankyrin repeat and PH domain 7 (AGAP7), mRNA [NM_001077685]	AGAP7	653268	0.0439109	1.0309	0.94936	0.99697	0	223.011	229.903	373.747	133.068	289.979	182.273	1
A_32_P221958	ref|NM_001077685|ref|NM_001190810|ref|NM_001144000|ref|NM_133447	hs|chr10:51464420-51464361	0	AGAP7	NM_001077685	ref|Homo sapiens ArfGAP with GTPase domain, ankyrin repeat and PH domain 7 (AGAP7), mRNA [NM_001077685]	AGAP7	653268	-0.165714	0.891487	0.824951	0.991737	0	300.525	267.915	487.476	185.272	393.039	182.624	1
A_33_P3378081	ref|NM_152336	hs|chr15:87531258-87531317	0	AGBL1	NM_152336	ref|Homo sapiens ATP/GTP binding protein-like 1 (AGBL1), mRNA [NM_152336]	AGBL1	123624	0.0820624	1.05853	0.740687	0.9898	0	41.4312	43.8561	42.0439	40.8274	46.4034	41.4487	0
A_33_P3355418	ref|NM_152336|ens|ENST00000389298|ens|ENST00000421325|ens|ENST00000299974	hs|chr15:87217546-87217605	0	AGBL1	NM_152336	ref|Homo sapiens ATP/GTP binding protein-like 1 (AGBL1), mRNA [NM_152336]	AGBL1	123624	-0.500134	0.707041	0.367742	0.987258	0	171.149	121.009	114.193	256.511	120.334	121.688	1
A_32_P167705	ref|NM_024783|ens|ENST00000425363|ens|ENST00000357610|ens|ENST00000298861	hs|chr11:47681302-47681243	0	AGBL2	NM_024783	ref|Homo sapiens ATP/GTP binding protein-like 2 (AGBL2), mRNA [NM_024783]	AGBL2	79841	-0.505913	0.704214	0.269028	0.987258	0	79.4719	55.9652	68.0536	92.806	72.162	43.4039	0
A_33_P3378061	ref|NM_178563|ens|ENST00000451798|ens|ENST00000275763|ens|ENST00000436302	hs|chr7:134730601-134730660	0	AGBL3	NM_178563	ref|Homo sapiens ATP/GTP binding protein-like 3 (AGBL3), mRNA [NM_178563]	AGBL3	340351	0.0633218	1.04487	0.807412	0.991151	0	34.374	35.9163	32.0384	36.8799	33.9052	38.0468	0
A_32_P82623	ref|NM_178563|ens|ENST00000359383|ens|ENST00000494702|ens|ENST00000451798	hs|chr7:134674061-134678302	0	AGBL3	NM_178563	ref|Homo sapiens ATP/GTP binding protein-like 3 (AGBL3), mRNA [NM_178563]	AGBL3	340351	-0.464863	0.72454	0.548046	0.987258	0	286.507	207.585	153.977	533.106	198.067	217.561	1
A_33_P3386562	ref|NM_032785|ens|ENST00000401055|ens|ENST00000371838|ens|ENST00000371836	hs|chr1:49511326-49511267	0	AGBL4	NM_032785	ref|Homo sapiens ATP/GTP binding protein-like 4 (AGBL4), mRNA [NM_032785]	AGBL4	84871	-0.00822176	0.994317	0.972957	0.99841	0	36.426	36.219	35.0485	37.8577	35.2946	37.1677	0
A_33_P3378101	ref|NM_032785|ens|ENST00000371839|gb|AK094826	hs|chr1:48998586-48998527	0	AGBL4	NM_032785	ref|Homo sapiens ATP/GTP binding protein-like 4 (AGBL4), mRNA [NM_032785]	AGBL4	84871	-0.102196	0.931614	0.681754	0.987258	0	76.6475	71.4059	74.1585	79.22	68.0212	74.9589	0
A_24_P196372	ref|NM_001035507|ens|ENST00000489683|ens|ENST00000477136|ens|ENST00000323064	hs|chr2:27278723-27278782	0	AGBL5	NM_001035507	ref|Homo sapiens ATP/GTP binding protein-like 5 (AGBL5), transcript variant 3, mRNA [NM_001035507]	AGBL5	60509	-0.0128143	0.991157	0.982458	0.999346	0	238.741	236.629	152.053	374.849	212.051	264.056	1
A_33_P3396010	ens|ENST00000375059|ens|ENST00000415538|ens|ENST00000417568|ens|ENST00000432550	hs|chr6:32149366-32149307	0	ENST00000375059	ENST00000375059	ens|Advanced glycosylation end product-specific receptor Precursor (Receptor for advanced glycosylation end products) [Source:UniProtKB/Swiss-Prot;Acc:Q15109] [ENST00000375059]	AGER	177	0.0366068	1.0257	0.898809	0.996521	0	53.8895	55.2744	62.1367	46.7369	55.3014	55.2474	0
A_33_P3396008	ref|NM_172197|ens|ENST00000375056|ens|ENST00000412794|ens|ENST00000418313	hs|chr6:32151757-32151698	0	AGER	NM_172197	ref|Homo sapiens advanced glycosylation end product-specific receptor (AGER), transcript variant 2, mRNA [NM_172197]	AGER	177	-0.366646	0.775584	0.292717	0.987258	0	53.4271	41.4372	44.5726	64.0407	43.3805	39.581	0
A_23_P93360	ref|NM_001136|ref|NM_172197|ens|ENST00000441158|ens|ENST00000375065	hs|chr6:32148875-32148816	0	AGER	NM_001136	ref|Homo sapiens advanced glycosylation end product-specific receptor (AGER), transcript variant 1, mRNA [NM_001136]	AGER	177	-0.525525	0.694706	0.406517	0.987258	0	352.678	245.008	228.512	544.312	301.2	199.299	1
A_33_P3238997	ref|NM_001135187|ref|NM_004504|ref|NM_001135188|ref|NM_001135189	hs|chr2:228422219-228422278	0	AGFG1	NM_001135187	ref|Homo sapiens ArfGAP with FG repeats 1 (AGFG1), transcript variant 1, mRNA [NM_001135187]	AGFG1	3267	1.5947	3.02031	0.244002	0.987258	0	164.329	496.324	467.149	57.8056	441.652	557.763	1
A_33_P3238993	ref|NM_001135187|ref|NM_004504|ref|NM_001135188|ref|NM_001135189	hs|chr2:228419195-228419254	0	AGFG1	NM_001135187	ref|Homo sapiens ArfGAP with FG repeats 1 (AGFG1), transcript variant 1, mRNA [NM_001135187]	AGFG1	3267	0.292372	1.22465	0.399711	0.987258	0	1023.16	1253.02	1092.19	958.498	1038.75	1511.49	1
A_24_P363583	ref|NM_006076|ens|ENST00000300176|gb|AK090744|gb|AX746598	hs|chr7:100165018-100165077	0	AGFG2	NM_006076	ref|Homo sapiens ArfGAP with FG repeats 2 (AGFG2), mRNA [NM_006076]	AGFG2	3268	-0.163049	0.893136	0.550091	0.987258	0	48.5331	43.3466	44.4503	52.9909	40.9435	45.8908	0
A_23_P311640	ref|NM_006076|ens|ENST00000262935|ens|ENST00000474713|ens|ENST00000300176	hs|chr7:100163205-100163264	0	AGFG2	NM_006076	ref|Homo sapiens ArfGAP with FG repeats 2 (AGFG2), mRNA [NM_006076]	AGFG2	3268	-0.234096	0.850218	0.44067	0.987258	0	201.368	171.206	176.549	229.675	160.717	182.38	1
A_33_P3227666	ref|NM_018046|ens|ENST00000312916|gb|BX648120|gb|AK131377	hs|chr5:76360866-76360925	0	AGGF1	NM_018046	ref|Homo sapiens angiogenic factor with G patch and FHA domains 1 (AGGF1), mRNA [NM_018046]	AGGF1	55109	0.675654	1.59732	0.521689	0.987258	0	441.893	705.846	1048.25	186.282	752.374	662.195	1
A_23_P309224	ref|NM_018238|gb|AK222769|gb|CR603206|gb|AJ278150	hs|chr7:141353184-141353243	0	AGK	NM_018238	ref|Homo sapiens acylglycerol kinase (AGK), nuclear gene encoding mitochondrial protein, mRNA [NM_018238]	AGK	55750	0.25246	1.19124	0.345767	0.987258	0	394.109	469.477	399.477	388.813	502.643	438.5	1
A_23_P200298	ref|NM_000028|ref|NM_000642|ref|NM_000645|ref|NM_000646	hs|chr1:100389229-100389288	0	AGL	NM_000028	ref|Homo sapiens amylo-alpha-1, 6-glucosidase, 4-alpha-glucanotransferase (AGL), transcript variant 4, mRNA [NM_000028]	AGL	178	1.31316	2.48485	0.324279	0.987258	0	508.832	1264.37	1427.06	181.429	1007.93	1586.06	1
A_23_P103720	ref|NM_024758|gb|BC005090|gb|AY057097|gb|AK027037	hs|chr1:15900155-15900096	0	AGMAT	NM_024758	ref|Homo sapiens agmatine ureohydrolase (agmatinase) (AGMAT), mRNA [NM_024758]	AGMAT	79814	-0.0581048	0.960525	0.964737	0.997354	0	376.976	362.095	129.862	1094.32	251.073	522.209	1
A_23_P103720	ref|NM_024758|gb|BC005090|gb|AY057097|gb|AK027037	hs|chr1:15900155-15900096	0	AGMAT	NM_024758	ref|Homo sapiens agmatine ureohydrolase (agmatinase) (AGMAT), mRNA [NM_024758]	AGMAT	79814	-0.0623603	0.957696	0.961448	0.997354	0	380.751	364.643	132.471	1094.36	262.802	505.95	1
A_23_P103720	ref|NM_024758|gb|BC005090|gb|AY057097|gb|AK027037	hs|chr1:15900155-15900096	0	AGMAT	NM_024758	ref|Homo sapiens agmatine ureohydrolase (agmatinase) (AGMAT), mRNA [NM_024758]	AGMAT	79814	-0.10057	0.932665	0.938825	0.99697	0	398.342	371.519	137.952	1150.23	256.644	537.814	1
A_23_P103720	ref|NM_024758|gb|BC005090|gb|AY057097|gb|AK027037	hs|chr1:15900155-15900096	0	AGMAT	NM_024758	ref|Homo sapiens agmatine ureohydrolase (agmatinase) (AGMAT), mRNA [NM_024758]	AGMAT	79814	-0.104062	0.93041	0.938329	0.99697	0	346.854	322.716	117.01	1028.18	219.036	475.473	1
A_23_P103720	ref|NM_024758|gb|BC005090|gb|AY057097|gb|AK027037	hs|chr1:15900155-15900096	0	AGMAT	NM_024758	ref|Homo sapiens agmatine ureohydrolase (agmatinase) (AGMAT), mRNA [NM_024758]	AGMAT	79814	-0.11049	0.926273	0.934082	0.99697	0	401.472	371.873	133.674	1205.77	269.855	512.46	1
A_23_P103720	ref|NM_024758|gb|BC005090|gb|AY057097|gb|AK027037	hs|chr1:15900155-15900096	0	AGMAT	NM_024758	ref|Homo sapiens agmatine ureohydrolase (agmatinase) (AGMAT), mRNA [NM_024758]	AGMAT	79814	-0.125302	0.916812	0.923622	0.99697	0	386.598	354.438	133.904	1116.16	247.273	508.046	1
A_23_P103720	ref|NM_024758|gb|BC005090|gb|AY057097|gb|AK027037	hs|chr1:15900155-15900096	0	AGMAT	NM_024758	ref|Homo sapiens agmatine ureohydrolase (agmatinase) (AGMAT), mRNA [NM_024758]	AGMAT	79814	-0.126311	0.916171	0.923126	0.99697	0	381.607	349.617	131.816	1104.76	244.543	499.839	1
A_23_P103720	ref|NM_024758|gb|BC005090|gb|AY057097|gb|AK027037	hs|chr1:15900155-15900096	0	AGMAT	NM_024758	ref|Homo sapiens agmatine ureohydrolase (agmatinase) (AGMAT), mRNA [NM_024758]	AGMAT	79814	-0.127228	0.915589	0.923914	0.99697	0	384.237	351.803	129.563	1139.51	247.919	499.216	1
A_23_P103720	ref|NM_024758|gb|BC005090|gb|AY057097|gb|AK027037	hs|chr1:15900155-15900096	0	AGMAT	NM_024758	ref|Homo sapiens agmatine ureohydrolase (agmatinase) (AGMAT), mRNA [NM_024758]	AGMAT	79814	-0.159769	0.895169	0.905359	0.996521	0	405.844	363.299	137.558	1197.39	244.685	539.413	1
A_23_P103720	ref|NM_024758|gb|BC005090|gb|AY057097|gb|AK027037	hs|chr1:15900155-15900096	0	AGMAT	NM_024758	ref|Homo sapiens agmatine ureohydrolase (agmatinase) (AGMAT), mRNA [NM_024758]	AGMAT	79814	-0.189854	0.876695	0.883415	0.995676	0	350.546	307.321	123.049	998.644	213.968	441.406	1
A_23_P136116	ref|NM_001004320|ens|ENST00000456831|ens|ENST00000342526|gb|BC108676	hs|chr7:15405225-15405166	0	TMEM195	NM_001004320	ref|Homo sapiens transmembrane protein 195 (TMEM195), mRNA [NM_001004320]	AGMO	392636	0.772893	1.70869	0.429921	0.987258	0	45.785	78.2324	39.183	53.4994	36.1903	169.115	1
A_23_P258093	ref|NM_006411|ref|NM_032741|ens|ENST00000412465|ens|ENST00000425924	hs|chr6:32136254-32136195	0	AGPAT1	NM_006411	ref|Homo sapiens 1-acylglycerol-3-phosphate O-acyltransferase 1 (lysophosphatidic acid acyltransferase, alpha) (AGPAT1), transcript variant 1, mRNA [NM_006411]	AGPAT1	10554	-0.249984	0.840906	0.465004	0.987258	0	6595.73	5546.39	5410.11	8041.17	5505.7	5587.38	1
A_33_P3360540	ref|NM_006412|ref|NM_001012727|ens|ENST00000371696|ens|ENST00000371694	hs|chr9:139567678-139567619	0	AGPAT2	NM_006412	ref|Homo sapiens 1-acylglycerol-3-phosphate O-acyltransferase 2 (lysophosphatidic acid acyltransferase, beta) (AGPAT2), transcript variant 1, mRNA [NM_006412]	AGPAT2	10555	-0.443005	0.735601	0.152677	0.987258	0	22083.6	16244.7	20280.4	24047.1	15431	17101.3	1
A_24_P344711	ref|NM_020132|ref|NM_001037553|ens|ENST00000398058|ens|ENST00000398061	hs|chr21:45404347-45404406	0	AGPAT3	NM_020132	ref|Homo sapiens 1-acylglycerol-3-phosphate O-acyltransferase 3 (AGPAT3), transcript variant 1, mRNA [NM_020132]	AGPAT3	56894	0.208141	1.1552	0.458553	0.987258	0	1031.37	1191.44	1071.8	992.468	1323.08	1072.9	1
A_33_P3323074	ref|NM_020133|ens|ENST00000366911|ens|ENST00000366908|ens|ENST00000437165	hs|chr6:161570280-161570221	0	AGPAT4	NM_020133	ref|Homo sapiens 1-acylglycerol-3-phosphate O-acyltransferase 4 (lysophosphatidic acid acyltransferase, delta) (AGPAT4), mRNA [NM_020133]	AGPAT4	56895	0.381584	1.30277	0.379127	0.987258	0	136.464	177.782	180.199	103.344	193.169	163.621	1
A_32_P141768	ref|NM_020133|ens|ENST00000320285|gb|CR590247|gb|CR627395	hs|chr6:161551171-161551112	0	AGPAT4	NM_020133	ref|Homo sapiens 1-acylglycerol-3-phosphate O-acyltransferase 4 (lysophosphatidic acid acyltransferase, delta) (AGPAT4), mRNA [NM_020133]	AGPAT4	56895	0.283974	1.21754	0.525943	0.987258	0	497.988	606.322	683.134	363.021	622.087	590.957	1
A_33_P3323068	ref|NM_020133|ens|ENST00000366905|ens|ENST00000366906|ens|ENST00000436279	hs|chr6:161587364-161587305	0	AGPAT4	NM_020133	ref|Homo sapiens 1-acylglycerol-3-phosphate O-acyltransferase 4 (lysophosphatidic acid acyltransferase, delta) (AGPAT4), mRNA [NM_020133]	AGPAT4	56895	-0.612737	0.653955	0.225495	0.987258	0	233.48	152.685	167.463	325.523	156.86	148.622	1
A_23_P70359	ref|NR_024277|gb|AK026765|gb|AL136708	hs|chr6:161581396-161581337	0	NCRNA00241	NR_024277	ref|Homo sapiens non-protein coding RNA 241 (NCRNA00241), non-coding RNA [NR_024277]	AGPAT4-IT1	79992	0.922706	1.89567	0.252983	0.987258	0	82.4369	156.273	147.851	45.9642	179.126	136.336	1
A_33_P3217218	ref|NM_018361|gb|AK021722	hs|chr8:6618891-6618950	0	AGPAT5	NM_018361	ref|Homo sapiens 1-acylglycerol-3-phosphate O-acyltransferase 5 (lysophosphatidic acid acyltransferase, epsilon) (AGPAT5), mRNA [NM_018361]	AGPAT5	55326	0.937174	1.91477	0.252074	0.987258	0	109.254	209.197	199.505	59.8307	228.876	191.21	1
A_24_P103686	ref|NM_178819|ens|ENST00000521349|ens|ENST00000518628|ens|ENST00000396987	hs|chr8:41476425-41476484	0	AGPAT6	NM_178819	ref|Homo sapiens 1-acylglycerol-3-phosphate O-acyltransferase 6 (lysophosphatidic acid acyltransferase, zeta) (AGPAT6), mRNA [NM_178819]	AGPAT6	137964	0.358244	1.28186	0.517981	0.987258	0	746.876	957.394	1009.3	552.684	714.678	1282.54	1
A_23_P69810	ref|NM_032717|ens|ENST00000395226|ens|ENST00000264409|gb|AK055749	hs|chr4:84526584-84526643	0	AGPAT9	NM_032717	ref|Homo sapiens 1-acylglycerol-3-phosphate O-acyltransferase 9 (AGPAT9), mRNA [NM_032717]	AGPAT9	84803	1.59137	3.01336	0.110545	0.987258	0	83.8668	252.721	162.257	43.3487	292.176	218.593	1
A_33_P3257538	ref|NM_001083612|ref|NM_001013619|ens|ENST00000360519|ens|ENST00000408962	hs|chr15:78807389-78807448	0	AGPHD1	NM_001083612	ref|Homo sapiens aminoglycoside phosphotransferase domain containing 1 (AGPHD1), transcript variant 2, mRNA [NM_001083612]	AGPHD1	123688	-0.643068	0.64035	0.441039	0.987258	0	275.917	176.683	142.42	534.549	167.73	186.115	1
A_24_P602507	ref|NM_001013619|ref|NM_001083612|ens|ENST00000408962|ens|ENST00000388988	hs|chr15:78819820-78819879	0	AGPHD1	NM_001013619	ref|Homo sapiens aminoglycoside phosphotransferase domain containing 1 (AGPHD1), transcript variant 1, mRNA [NM_001013619]	AGPHD1	123688	-0.72705	0.604138	0.420401	0.987258	0	601.933	363.65	293.373	1235.02	364.598	362.705	1
A_32_P27706	ref|NM_003659|ens|ENST00000264167|gb|BC008192	hs|chr2:178408390-178408449	0	AGPS	NM_003659	ref|Homo sapiens alkylglycerone phosphate synthase (AGPS), mRNA [NM_003659]	AGPS	8540	0.752139	1.68429	0.174355	0.987258	0	998.625	1681.97	1432.65	696.087	1645.48	1719.27	1
A_33_P3397693	ref|NM_003659|ens|ENST00000264167|gb|AY544121	hs|chr2:178403842-178403901	0	AGPS	NM_003659	ref|Homo sapiens alkylglycerone phosphate synthase (AGPS), mRNA [NM_003659]	AGPS	8540	0.676233	1.59796	0.30516	0.987258	0	577.915	923.486	922.918	361.88	806.608	1057.3	1
A_23_P368645	ref|NM_003659|ens|ENST00000264167|gb|AK314259|gb|AK309714	hs|chr2:178402806-178402865	0	AGPS	NM_003659	ref|Homo sapiens alkylglycerone phosphate synthase (AGPS), mRNA [NM_003659]	AGPS	8540	0.462691	1.37811	0.198357	0.987258	0	1361.02	1875.63	1607.41	1152.39	1744.45	2016.68	1
A_23_P31407	ref|NM_006408|ens|ENST00000412973|ens|ENST00000401412|ens|ENST00000419572	hs|chr7:16839382-16837274	0	AGR2	NM_006408	ref|Homo sapiens anterior gradient homolog 2 (Xenopus laevis) (AGR2), mRNA [NM_006408]	AGR2	10551	-0.688544	0.62048	0.297226	0.987258	0	77.3759	48.0102	47.7326	125.429	50.9007	45.2839	1
A_23_P42811	ref|NM_176813|ens|ENST00000486448|ens|ENST00000310398|gb|AY069977	hs|chr7:16913467-16913408	0	AGR3	NM_176813	ref|Homo sapiens anterior gradient homolog 3 (Xenopus laevis) (AGR3), mRNA [NM_176813]	AGR3	155465	0.0769657	1.0548	0.768169	0.989802	0	33.8799	35.7364	37.164	30.886	35.8981	35.5755	0
A_23_P343411	ref|NM_198576|ens|ENST00000379364|ens|ENST00000461111|ens|ENST00000379370	hs|chr1:991186-991245	0	AGRN	NM_198576	ref|Homo sapiens agrin (AGRN), mRNA [NM_198576]	AGRN	375790	0.575132	1.48981	0.668681	0.987258	0	828.068	1233.67	2522.05	271.881	1547.16	983.698	1
A_33_P3279470	ref|NM_001138|ens|ENST00000393941|ens|ENST00000290953|gb|U89485	hs|chr16:67516612-67516553	0	AGRP	NM_001138	ref|Homo sapiens agouti related protein homolog (mouse) (AGRP), mRNA [NM_001138]	AGRP	181	-0.257538	0.836514	0.500967	0.987258	0	89.6176	74.9664	70.0056	114.724	75.9921	73.9546	1
A_33_P3407618	ref|NR_026811|ref|NR_033936|gb|BC072390|gb|BC007811	hs|chr15:82765395-82765336	0	LOC80154	NR_026811	ref|Homo sapiens hypothetical LOC80154 (LOC80154), non-coding RNA [NR_026811]	AGSK1	80154	0.0352554	1.02474	0.889337	0.996482	0	71.3164	73.0806	65.9708	77.0952	72.6674	73.4962	0
A_23_P129103	ref|NR_026811|ref|NR_027001|ref|NR_033936|ens|ENST00000335068	hs|chr15:82764270-82764211	0	LOC80154	NR_026811	ref|Homo sapiens hypothetical LOC80154 (LOC80154), non-coding RNA [NR_026811]	AGSK1	80154	-0.137318	0.909208	0.65496	0.987258	0	1435.23	1304.92	1244.44	1655.26	1416.11	1202.46	1
A_33_P3227774	ref|NR_026811|ref|NR_027001|ref|NR_033936|ens|ENST00000335068	hs|chr15:82764411-82764352	0	LOC80154	NR_026811	ref|Homo sapiens hypothetical LOC80154 (LOC80154), non-coding RNA [NR_026811]	AGSK1	80154	-0.227129	0.854333	0.466932	0.987258	0	737.411	629.995	631.666	860.86	656.613	604.456	1
A_33_P3222659	ens|ENST00000400817|gb|AK026448|gb|XM_001714450	hs|chr15:84872156-84872097	0	ENST00000400817	ENST00000400817	gb|Homo sapiens cDNA: FLJ22795 fis, clone KAIA2543. [AK026448]	AGSK1	80154	-0.63932	0.642016	0.394422	0.987258	0	113.943	73.153	64.0964	202.553	80.3396	66.6093	1
A_23_P115261	ref|NM_000029|ens|ENST00000430091|ens|ENST00000366667|gb|CR618811	hs|chr1:230838590-230838531	0	AGT	NM_000029	ref|Homo sapiens angiotensinogen (serpin peptidase inhibitor, clade A, member 8) (AGT), mRNA [NM_000029]	AGT	183	0.0496662	1.03503	0.941126	0.99697	0	118.433	122.581	131.358	106.779	210.062	71.5317	1
A_23_P115261	ref|NM_000029|ens|ENST00000430091|ens|ENST00000366667|gb|CR618811	hs|chr1:230838590-230838531	0	AGT	NM_000029	ref|Homo sapiens angiotensinogen (serpin peptidase inhibitor, clade A, member 8) (AGT), mRNA [NM_000029]	AGT	183	-0.50104	0.706597	0.310972	0.987258	0	99.0041	69.956	137.701	71.1817	64.4639	75.916	1
A_23_P115261	ref|NM_000029|ens|ENST00000430091|ens|ENST00000366667|gb|CR618811	hs|chr1:230838590-230838531	0	AGT	NM_000029	ref|Homo sapiens angiotensinogen (serpin peptidase inhibitor, clade A, member 8) (AGT), mRNA [NM_000029]	AGT	183	-0.542285	0.686682	0.296153	0.987258	0	96.2192	66.072	137.778	67.1962	64.1011	68.1036	1
A_23_P115261	ref|NM_000029|ens|ENST00000430091|ens|ENST00000366667|gb|CR618811	hs|chr1:230838590-230838531	0	AGT	NM_000029	ref|Homo sapiens angiotensinogen (serpin peptidase inhibitor, clade A, member 8) (AGT), mRNA [NM_000029]	AGT	183	-0.634056	0.644362	0.225353	0.987258	0	102.325	65.9341	144.069	72.6757	70.6998	61.4896	1
A_23_P115261	ref|NM_000029|ens|ENST00000430091|ens|ENST00000366667|gb|CR618811	hs|chr1:230838590-230838531	0	AGT	NM_000029	ref|Homo sapiens angiotensinogen (serpin peptidase inhibitor, clade A, member 8) (AGT), mRNA [NM_000029]	AGT	183	-0.635378	0.643772	0.0929946	0.987258	0	115.25	74.1945	135.193	98.2481	72.6265	75.7963	1
A_23_P115261	ref|NM_000029|ens|ENST00000430091|ens|ENST00000366667|gb|CR618811	hs|chr1:230838590-230838531	0	AGT	NM_000029	ref|Homo sapiens angiotensinogen (serpin peptidase inhibitor, clade A, member 8) (AGT), mRNA [NM_000029]	AGT	183	-0.689367	0.620126	0.12282	0.987258	0	112.711	69.8952	144.007	88.2164	71.4132	68.4094	1
A_23_P115261	ref|NM_000029|ens|ENST00000430091|ens|ENST00000366667|gb|CR618811	hs|chr1:230838590-230838531	0	AGT	NM_000029	ref|Homo sapiens angiotensinogen (serpin peptidase inhibitor, clade A, member 8) (AGT), mRNA [NM_000029]	AGT	183	-0.756956	0.591744	0.0755731	0.987258	0	119.622	70.7853	145.426	98.3955	73.2828	68.3728	1
A_23_P115261	ref|NM_000029|ens|ENST00000430091|ens|ENST00000366667|gb|CR618811	hs|chr1:230838590-230838531	0	AGT	NM_000029	ref|Homo sapiens angiotensinogen (serpin peptidase inhibitor, clade A, member 8) (AGT), mRNA [NM_000029]	AGT	183	-0.776249	0.583883	0.124205	0.987258	0	114.737	66.993	154.62	85.1414	65.547	68.4708	1
A_23_P115261	ref|NM_000029|ens|ENST00000430091|ens|ENST00000366667|gb|CR618811	hs|chr1:230838590-230838531	0	AGT	NM_000029	ref|Homo sapiens angiotensinogen (serpin peptidase inhibitor, clade A, member 8) (AGT), mRNA [NM_000029]	AGT	183	-0.875984	0.544882	0.0371893	0.987258	0	118.687	64.6704	137.436	102.496	63.3063	66.0639	1
A_23_P115261	ref|NM_000029|ens|ENST00000430091|ens|ENST00000366667|gb|CR618811	hs|chr1:230838590-230838531	0	AGT	NM_000029	ref|Homo sapiens angiotensinogen (serpin peptidase inhibitor, clade A, member 8) (AGT), mRNA [NM_000029]	AGT	183	-1.23487	0.42488	0.00957289	0.987258	0	155.809	66.2001	140.772	172.452	65.9296	66.4717	1
A_23_P169278	ref|NM_015239|ens|ENST00000357081|ens|ENST00000376083|gb|AK295774	hs|chr9:88161772-88161713	0	AGTPBP1	NM_015239	ref|Homo sapiens ATP/GTP binding protein 1 (AGTPBP1), mRNA [NM_015239]	AGTPBP1	23287	1.36696	2.57927	0.170086	0.987258	0	258.907	667.79	529.387	126.624	629.601	708.296	1
A_33_P3334185	ref|NM_015239|ens|ENST00000376082|ens|ENST00000376081|ens|ENST00000376080	hs|chr9:88284464-88284405	0	AGTPBP1	NM_015239	ref|Homo sapiens ATP/GTP binding protein 1 (AGTPBP1), mRNA [NM_015239]	AGTPBP1	23287	0.400446	1.31992	0.540658	0.987258	0	73.2728	96.7139	119.154	45.0584	81.7606	114.402	1
A_23_P166616	ref|NM_031850|ref|NM_000685|ref|NM_004835|ref|NM_009585	hs|chr3:148460067-148460126	0	AGTR1	NM_031850	ref|Homo sapiens angiotensin II receptor, type 1 (AGTR1), transcript variant 4, mRNA [NM_031850]	AGTR1	185	1.33645	2.52529	0.11169	0.987258	0	71.3651	180.217	124.196	41.0075	194.424	167.049	1
A_33_P3376493	ref|NM_000686|ens|ENST00000371906|gb|BC095504	hs|chrX:115304624-115304683	0	AGTR2	NM_000686	ref|Homo sapiens angiotensin II receptor, type 2 (AGTR2), mRNA [NM_000686]	AGTR2	186	0.141944	1.10339	0.564154	0.987258	0	37.7441	41.6465	37.8221	37.6662	40.2398	43.1023	0
A_23_P62309	ref|NM_000686|ens|ENST00000371906	hs|chrX:115305564-115305623	0	AGTR2	NM_000686	ref|Homo sapiens angiotensin II receptor, type 2 (AGTR2), mRNA [NM_000686]	AGTR2	186	-0.0879704	0.940845	0.718942	0.987752	0	35.3516	33.2604	35.062	35.6436	31.8404	34.7437	0
A_23_P158596	ref|NM_001040196|ref|NM_001040194|ref|NM_001040195|ref|NM_001040197	hs|chr1:11808472-11808531	0	AGTRAP	NM_001040196	ref|Homo sapiens angiotensin II receptor-associated protein (AGTRAP), transcript variant 4, mRNA [NM_001040196]	AGTRAP	57085	-1.17411	0.443157	0.0120271	0.987258	0	1964.92	870.769	2000.59	1929.89	972.414	779.749	1
A_33_P3250278	ref|NM_000030|ens|ENST00000307503|gb|AB292648|gb|X56092	hs|chr2:241818463-241818522	0	AGXT	NM_000030	ref|Homo sapiens alanine-glyoxylate aminotransferase (AGXT), mRNA [NM_000030]	AGXT	189	-0.740045	0.598721	0.329449	0.987258	0	114.283	68.4239	64.1145	203.709	69.2428	67.6146	1
A_24_P63468	ref|NM_031900|ens|ENST00000510428|ens|ENST00000512135|ens|ENST00000231420	hs|chr5:34998912-34998853	0	AGXT2	NM_031900	ref|Homo sapiens alanine--glyoxylate aminotransferase 2 (AGXT2), nuclear gene encoding mitochondrial protein, mRNA [NM_031900]	AGXT2	64902	-0.189688	0.876795	0.53836	0.987258	0	38.824	34.0407	33.0887	45.5533	33.9291	34.1527	0
A_23_P257231	ref|NM_031279|ref|NM_001146590|ref|NM_001146627|ref|NR_027474	hs|chr4:109663325-109663266	0	AGXT2L1	NM_031279	ref|Homo sapiens alanine-glyoxylate aminotransferase 2-like 1 (AGXT2L1), transcript variant 1, mRNA [NM_031279]	AGXT2L1	64850	0.0676254	1.04799	0.782195	0.989802	0	38.8069	40.6692	40.0926	37.5624	39.2095	42.1833	0
A_23_P41888	ref|NM_153373|ens|ENST00000510991|ens|ENST00000494126|ens|ENST00000493197	hs|chr5:177638915-177635882	0	AGXT2L2	NM_153373	ref|Homo sapiens alanine-glyoxylate aminotransferase 2-like 2 (AGXT2L2), mRNA [NM_153373]	AGXT2L2	85007	-0.810158	0.570319	0.209067	0.987258	0	921.317	525.445	663.619	1279.08	715.781	385.722	1
A_24_P28657	ref|NM_015446|ens|ENST00000361182|ens|ENST00000428671|ens|ENST00000283201	hs|chr1:247003155-247003096	0	AHCTF1	NM_015446	ref|Homo sapiens AT hook containing transcription factor 1 (AHCTF1), mRNA [NM_015446]	AHCTF1	25909	1.41109	2.65939	0.253301	0.987258	0	198.198	527.085	510.079	77.0124	486.03	571.608	1
A_33_P3666346	ref|NM_015446|ens|ENST00000435109|ens|ENST00000361182|ens|ENST00000428671	hs|chr1:247058043-247057984	0	AHCTF1	NM_015446	ref|Homo sapiens AT hook containing transcription factor 1 (AHCTF1), mRNA [NM_015446]	AHCTF1	25909	0.534103	1.44804	0.265387	0.987258	0	68.7307	99.525	94.2956	50.0969	96.3624	102.791	1
A_24_P57367	ref|NM_000687|ref|NM_001161766|ens|ENST00000480653|ens|ENST00000217426	hs|chr20:32878215-32878156	0	AHCY	NM_000687	ref|Homo sapiens adenosylhomocysteinase (AHCY), transcript variant 1, mRNA [NM_000687]	AHCY	191	0.0101497	1.00706	0.983474	0.999346	0	993.704	1000.72	715.655	1379.78	836.42	1197.29	1
A_23_P368126	ref|NM_006621|ens|ENST00000359172|ens|ENST00000369799|gb|BC111563	hs|chr1:110564765-110564824	0	AHCYL1	NM_006621	ref|Homo sapiens adenosylhomocysteinase-like 1 (AHCYL1), mRNA [NM_006621]	AHCYL1	10768	0.579258	1.49408	0.38815	0.987258	0	8566.01	12798.3	13890.9	5282.34	15149.6	10812	1
A_24_P11307	ref|NM_006621|ens|ENST00000393614|ens|ENST00000481423|ens|ENST00000359172	hs|chr1:110562186-110562245	0	AHCYL1	NM_006621	ref|Homo sapiens adenosylhomocysteinase-like 1 (AHCYL1), mRNA [NM_006621]	AHCYL1	10768	0.487438	1.40195	0.396985	0.987258	0	1086.28	1522.91	1610.52	732.683	1796.62	1290.9	1
A_24_P72518	ref|NM_015328|ref|NM_001130723|ref|NM_001130720|ref|NM_001130722	hs|chr7:129069898-129069957	0	AHCYL2	NM_015328	ref|Homo sapiens adenosylhomocysteinase-like 2 (AHCYL2), transcript variant 1, mRNA [NM_015328]	AHCYL2	23382	0.72156	1.64896	0.457022	0.987258	0	456.122	752.129	991.287	209.876	677.085	835.491	1
A_23_P115331	ref|NM_001029882|ens|ENST00000374011|ens|ENST00000482400|ens|ENST00000247087	hs|chr1:27861300-27861242	0	AHDC1	NM_001029882	ref|Homo sapiens AT hook, DNA binding motif, containing 1 (AHDC1), mRNA [NM_001029882]	AHDC1	27245	-0.272021	0.828159	0.450124	0.987258	0	814.372	674.429	957.904	692.347	582.827	780.428	1
A_33_P3215797	ref|NM_001029882|ens|ENST00000482400|ens|ENST00000374011|ens|ENST00000247087	hs|chr1:27877922-27877863	0	AHDC1	NM_001029882	ref|Homo sapiens AT hook, DNA binding motif, containing 1 (AHDC1), mRNA [NM_001029882]	AHDC1	27245	-1.3602	0.389528	0.247537	0.987258	0	420.733	163.887	171.34	1033.13	168.698	159.214	1
A_23_P70746	ref|NM_017651|ref|NM_001134832|ref|NM_001134831|ref|NM_001134830	hs|chr6:135749806-135748426	0	AHI1	NM_017651	ref|Homo sapiens Abelson helper integration site 1 (AHI1), transcript variant 2, mRNA [NM_017651]	AHI1	54806	1.09849	2.1413	0.235907	0.987258	0	198.528	425.107	396.399	99.4283	409.658	441.139	1
A_24_P38143	ref|NM_017651|ref|NM_001134831|ref|NM_001134830|ens|ENST00000265602	hs|chr6:135605470-135605411	0	AHI1	NM_017651	ref|Homo sapiens Abelson helper integration site 1 (AHI1), transcript variant 2, mRNA [NM_017651]	AHI1	54806	0.546057	1.46009	0.310243	0.987258	0	475.889	694.84	694.452	326.113	724.266	666.61	1
A_23_P426636	ref|NM_001620|ens|ENST00000244934|ens|ENST00000378024|gb|AK128868	hs|chr11:62284928-62284869	0	AHNAK	NM_001620	ref|Homo sapiens AHNAK nucleoprotein (AHNAK), transcript variant 1, mRNA [NM_001620]	AHNAK	79026	1.56224	2.95313	0.113422	0.987258	0	386.564	1141.57	752.623	198.548	1058.16	1231.56	1
A_24_P943393	ref|NM_001620|ens|ENST00000378024|gb|AK091153|gb|AX746812	hs|chr11:62283459-62283400	0	AHNAK	NM_001620	ref|Homo sapiens AHNAK nucleoprotein (AHNAK), transcript variant 1, mRNA [NM_001620]	AHNAK	79026	1.48842	2.80582	0.114148	0.987258	0	4281.47	12013	8041.17	2279.64	10893.3	13247.8	1
A_23_P21363	ref|NM_024060|ens|ENST00000257247|gb|BC012477|gb|BC000926	hs|chr11:62201142-62201083	0	AHNAK	NM_024060	ref|Homo sapiens AHNAK nucleoprotein (AHNAK), transcript variant 2, mRNA [NM_024060]	AHNAK	79026	-0.185335	0.879445	0.857783	0.99451	0	3887.4	3418.76	1626.83	9289.15	3729.04	3134.29	1
A_24_P273253	ref|NM_138420|ens|ENST00000333244|gb|BC090889|gb|BC144467	hs|chr14:105404612-105404553	0	AHNAK2	NM_138420	ref|Homo sapiens AHNAK nucleoprotein 2 (AHNAK2), mRNA [NM_138420]	AHNAK2	113146	0.395877	1.31574	0.759517	0.989802	0	124.657	164.017	364.173	42.6704	128.147	209.926	1
A_33_P3222380	ref|NM_138420|ens|ENST00000333244|gb|AB095939|gb|AK126472	hs|chr14:105411626-105411567	0	AHNAK2	NM_138420	ref|Homo sapiens AHNAK nucleoprotein 2 (AHNAK2), mRNA [NM_138420]	AHNAK2	113146	0.352692	1.27694	0.793266	0.990139	0	143.467	183.199	424.009	48.543	125.174	268.121	1
A_23_P215566	ref|NM_001621|ens|ENST00000401808|ens|ENST00000242057|ens|ENST00000463496	hs|chr7:17384999-17385058	0	AHR	NM_001621	ref|Homo sapiens aryl hydrocarbon receptor (AHR), mRNA [NM_001621]	AHR	196	0.624234	1.54139	0.648755	0.987258	0	3379.73	5209.49	10634.8	1074.07	4439.1	6113.58	1
A_33_P3316800	ref|NM_001621|ens|ENST00000242057|ens|ENST00000463496|ens|ENST00000401808	hs|chr7:17382763-17382822	0	AHR	NM_001621	ref|Homo sapiens aryl hydrocarbon receptor (AHR), mRNA [NM_001621]	AHR	196	0.388016	1.30859	0.697831	0.987258	0	1544.79	2021.5	3562.4	669.881	1961.88	2082.94	1
A_23_P358709	ref|NM_020731|ens|ENST00000316418|gb|AB033060|gb|BC151852	hs|chr5:438030-438089	0	AHRR	NM_020731	ref|Homo sapiens aryl-hydrocarbon receptor repressor (AHRR), mRNA [NM_020731]	AHRR	57491	0.138713	1.10092	0.911041	0.996692	0	808.672	890.285	2186.01	299.153	1290.4	614.234	1
A_23_P117599	ref|NM_012111|ens|ENST00000216479|gb|AK300766|gb|AK313824	hs|chr14:77928985-77929044	0	AHSA1	NM_012111	ref|Homo sapiens AHA1, activator of heat shock 90kDa protein ATPase homolog 1 (yeast) (AHSA1), mRNA [NM_012111]	AHSA1	10598	-0.0071011	0.99509	0.986979	0.999467	0	2709.95	2696.65	2278.52	3223.07	2064.86	3521.73	1
A_23_P117599	ref|NM_012111|ens|ENST00000216479|gb|AK300766|gb|AK313824	hs|chr14:77928985-77929044	0	AHSA1	NM_012111	ref|Homo sapiens AHA1, activator of heat shock 90kDa protein ATPase homolog 1 (yeast) (AHSA1), mRNA [NM_012111]	AHSA1	10598	-0.0216981	0.985073	0.959174	0.997354	0	2667.72	2627.9	2307.68	3083.94	2005.99	3442.62	1
A_23_P117599	ref|NM_012111|ens|ENST00000216479|gb|AK300766|gb|AK313824	hs|chr14:77928985-77929044	0	AHSA1	NM_012111	ref|Homo sapiens AHA1, activator of heat shock 90kDa protein ATPase homolog 1 (yeast) (AHSA1), mRNA [NM_012111]	AHSA1	10598	-0.0418714	0.971394	0.925052	0.99697	0	2549.87	2476.93	2169.88	2996.4	1860.89	3296.9	1
A_23_P117599	ref|NM_012111|ens|ENST00000216479|gb|AK300766|gb|AK313824	hs|chr14:77928985-77929044	0	AHSA1	NM_012111	ref|Homo sapiens AHA1, activator of heat shock 90kDa protein ATPase homolog 1 (yeast) (AHSA1), mRNA [NM_012111]	AHSA1	10598	-0.0471083	0.967874	0.911756	0.996692	0	2810.76	2720.46	2503.57	3155.65	2046.21	3616.9	1
A_23_P117599	ref|NM_012111|ens|ENST00000216479|gb|AK300766|gb|AK313824	hs|chr14:77928985-77929044	0	AHSA1	NM_012111	ref|Homo sapiens AHA1, activator of heat shock 90kDa protein ATPase homolog 1 (yeast) (AHSA1), mRNA [NM_012111]	AHSA1	10598	-0.0479685	0.967297	0.917848	0.99697	0	2555.85	2472.26	2125.44	3073.41	1839.03	3323.53	1
A_23_P117599	ref|NM_012111|ens|ENST00000216479|gb|AK300766|gb|AK313824	hs|chr14:77928985-77929044	0	AHSA1	NM_012111	ref|Homo sapiens AHA1, activator of heat shock 90kDa protein ATPase homolog 1 (yeast) (AHSA1), mRNA [NM_012111]	AHSA1	10598	-0.0534711	0.963615	0.906141	0.996521	0	2667.01	2569.97	2189.9	3248.06	1955.83	3376.96	1
A_23_P117599	ref|NM_012111|ens|ENST00000216479|gb|AK300766|gb|AK313824	hs|chr14:77928985-77929044	0	AHSA1	NM_012111	ref|Homo sapiens AHA1, activator of heat shock 90kDa protein ATPase homolog 1 (yeast) (AHSA1), mRNA [NM_012111]	AHSA1	10598	-0.0564914	0.9616	0.894412	0.996482	0	2694.06	2590.61	2288.14	3172	1995.6	3363.04	1
A_23_P117599	ref|NM_012111|ens|ENST00000216479|gb|AK300766|gb|AK313824	hs|chr14:77928985-77929044	0	AHSA1	NM_012111	ref|Homo sapiens AHA1, activator of heat shock 90kDa protein ATPase homolog 1 (yeast) (AHSA1), mRNA [NM_012111]	AHSA1	10598	-0.0577064	0.96079	0.896909	0.996521	0	2691.78	2586.24	2267.93	3194.84	1954.41	3422.32	1
A_23_P117599	ref|NM_012111|ens|ENST00000216479|gb|AK300766|gb|AK313824	hs|chr14:77928985-77929044	0	AHSA1	NM_012111	ref|Homo sapiens AHA1, activator of heat shock 90kDa protein ATPase homolog 1 (yeast) (AHSA1), mRNA [NM_012111]	AHSA1	10598	-0.0637237	0.956791	0.891435	0.996482	0	2533.29	2423.83	2171.18	2955.8	1769.95	3319.28	1
A_23_P117599	ref|NM_012111|ens|ENST00000216479|gb|AK300766|gb|AK313824	hs|chr14:77928985-77929044	0	AHSA1	NM_012111	ref|Homo sapiens AHA1, activator of heat shock 90kDa protein ATPase homolog 1 (yeast) (AHSA1), mRNA [NM_012111]	AHSA1	10598	-0.109164	0.927125	0.81166	0.991367	0	2393.2	2218.8	2091.8	2738.03	1623.84	3031.73	1
A_23_P372467	ref|NM_152392|ens|ENST00000493628|ens|ENST00000484217|ens|ENST00000471542	hs|chr2:61413626-61413804	0	AHSA2	NM_152392	ref|Homo sapiens AHA1, activator of heat shock 90kDa protein ATPase homolog 2 (yeast) (AHSA2), mRNA [NM_152392]	AHSA2	130872	0.149406	1.10911	0.826048	0.991737	0	3271.34	3628.29	3060.7	3496.48	6283.86	2094.97	1
A_23_P155514	ref|NM_001622|ens|ENST00000411641|gb|CR601258|gb|AK303754	hs|chr3:186338832-186338891	0	AHSG	NM_001622	ref|Homo sapiens alpha-2-HS-glycoprotein (AHSG), mRNA [NM_001622]	AHSG	197	-0.179199	0.883193	0.568227	0.987258	0	71.184	62.8693	60.1013	84.3104	63.3702	62.3723	0
A_23_P135486	ref|NM_016633|ens|ENST00000302312|gb|DQ890925|gb|DQ894076	hs|chr16:31539912-31539971	0	AHSP	NM_016633	ref|Homo sapiens alpha hemoglobin stabilizing protein (AHSP), mRNA [NM_016633]	AHSP	51327	-0.41301	0.751055	0.264533	0.987258	0	69.2346	51.999	56.3163	85.1164	52.9105	51.1032	0
A_23_P36641	ref|NM_020661|ens|ENST00000229335|gb|AB040431	hs|chr12:8755209-8755150	0	AICDA	NM_020661	ref|Homo sapiens activation-induced cytidine deaminase (AICDA), mRNA [NM_020661]	AICDA	57379	-0.0280229	0.980763	0.909021	0.996692	0	37.4652	36.7445	35.4884	39.5521	36.3274	37.1664	0
A_23_P97457	ref|NM_022831|ens|ENST00000355727|ens|ENST00000474863|ens|ENST00000340020	hs|chr1:222842440-222842381	0	AIDA	NM_022831	ref|Homo sapiens axin interactor, dorsalization associated (AIDA), mRNA [NM_022831]	AIDA	64853	1.10028	2.14397	0.150158	0.987258	0	377.982	810.38	623.764	229.045	692.56	948.244	1
A_32_P182662	ref|NM_022831|ens|ENST00000495670|ens|ENST00000355727|ens|ENST00000474863	hs|chr1:222843215-222843156	0	AIDA	NM_022831	ref|Homo sapiens axin interactor, dorsalization associated (AIDA), mRNA [NM_022831]	AIDA	64853	0.412617	1.3311	0.385847	0.987258	0	449.011	597.677	357.541	563.882	469.273	761.217	1
A_33_P3250857	ens|ENST00000474863|gb|BC043142	hs|chr1:222885997-222885938	0	ENST00000474863	ENST00000474863	gb|Homo sapiens axin interactor, dorsalization associated, mRNA (cDNA clone IMAGE:5297142), complete cds. [BC043142]	AIDA	64853	-0.920405	0.528361	0.205105	0.987258	0	158.612	83.8044	94.9234	265.033	89.3858	78.5715	1
A_23_P214627	ref|NM_004847|ref|NM_001623|ref|NM_032955|ens|ENST00000376063	hs|chr6:31584674-31584733	0	AIF1	NM_004847	ref|Homo sapiens allograft inflammatory factor 1 (AIF1), transcript variant 2, mRNA [NM_004847]	AIF1	199	0.154338	1.11291	0.549371	0.987258	0	35.4533	39.4563	37.9829	33.0921	38.6039	40.3276	0
A_33_P3213288	ref|NM_004847|gb|EF070982|gb|U95213	hs|chr6:31584267-31584326	0	AIF1	NM_004847	ref|Homo sapiens allograft inflammatory factor 1 (AIF1), transcript variant 2, mRNA [NM_004847]	AIF1	199	-0.490817	0.711622	0.373904	0.987258	0	112.136	79.7987	75.0118	167.634	78.3248	81.3003	1
A_23_P392384	ref|NM_001185095|ref|NM_031426|ref|NM_001185096|ref|NR_033701	hs|chr9:133998333-133998392	0	AIF1L	NM_001185095	ref|Homo sapiens allograft inflammatory factor 1-like (AIF1L), transcript variant 3, mRNA [NM_001185095]	AIF1L	83543	0.00344881	1.00239	0.989388	0.999512	0	42.9541	43.0569	40.0912	46.0214	45.7945	40.4829	0
A_33_P3260026	ref|NM_001185096|ref|NM_001185095|ref|NM_031426|ref|NR_033701	hs|chr9:133993162-133993221	0	AIF1L	NM_001185096	ref|Homo sapiens allograft inflammatory factor 1-like (AIF1L), transcript variant 4, mRNA [NM_001185096]	AIF1L	83543	-0.164542	0.892212	0.597376	0.987258	0	53.9713	48.1538	45.8045	63.5942	46.5325	49.8317	0
A_33_P3260053	ref|NM_001185095|ref|NM_031426|ref|NM_001185096|ref|NR_033701	hs|chr9:133995766-133995825	0	AIF1L	NM_001185095	ref|Homo sapiens allograft inflammatory factor 1-like (AIF1L), transcript variant 3, mRNA [NM_001185095]	AIF1L	83543	-0.490113	0.711969	0.403483	0.987258	0	684.895	487.624	444.769	1054.66	525.457	452.515	1
A_23_P72537	ref|NM_004208|ref|NM_001130847|ref|NM_001130846|ref|NM_145813	hs|chrX:129263459-129263400	0	AIFM1	NM_004208	ref|Homo sapiens apoptosis-inducing factor, mitochondrion-associated, 1 (AIFM1), nuclear gene encoding mitochondrial protein, transcript variant 1, mRNA [NM_004208]	AIFM1	9131	-0.0482422	0.967114	0.868436	0.994566	0	4010.85	3878.95	4492.65	3580.72	3532.02	4259.96	1
A_33_P3319231	ens|ENST00000373248|gb|AF337957	hs|chr10:71858227-71858168	0	AIFM2	ENST00000373248	ens|apoptosis-inducing factor, mitochondrion-associated, 2 [Source:HGNC Symbol;Acc:21411] [ENST00000373248]	AIFM2	84883	0.226995	1.17039	0.458667	0.987258	0	44.6007	52.2004	46.2641	42.997	60.459	45.0699	0
A_32_P75094	ref|NM_032797|ref|NM_001198696|ens|ENST00000307864|ens|ENST00000395039	hs|chr10:71872124-71872065	0	AIFM2	NM_032797	ref|Homo sapiens apoptosis-inducing factor, mitochondrion-associated, 2 (AIFM2), transcript variant 2, mRNA [NM_032797]	AIFM2	84883	0.0476267	1.03356	0.923695	0.99697	0	1884.21	1947.45	2751.29	1290.4	2031.71	1866.7	1
A_23_P258194	ref|NM_001018060|ref|NM_001146288|ref|NM_144704|ref|NR_027464	hs|chr22:21333957-21334333	0	AIFM3	NM_001018060	ref|Homo sapiens apoptosis-inducing factor, mitochondrion-associated, 3 (AIFM3), nuclear gene encoding mitochondrial protein, transcript variant 2, mRNA [NM_001018060]	AIFM3	150209	0.0321783	1.02255	0.918416	0.99697	0	45.2032	46.2227	53.778	37.9956	44.119	48.4268	0
A_23_P93431	ref|NM_016108|ens|ENST00000357847|ens|ENST00000419072|ens|ENST00000344492	hs|chr6:143661259-143661318	0	AIG1	NM_016108	ref|Homo sapiens androgen-induced 1 (AIG1), mRNA [NM_016108]	AIG1	51390	-0.150836	0.900729	0.591792	0.987258	0	2996.12	2698.69	3368.05	2665.26	2796.72	2604.11	1
A_33_P3416574	ref|NM_016108|ens|ENST00000367601|ens|ENST00000458219|ens|ENST00000367598	hs|chr6:143458067-143458126	0	AIG1	NM_016108	ref|Homo sapiens androgen-induced 1 (AIG1), mRNA [NM_016108]	AIG1	51390	-0.221695	0.857557	0.413883	0.987258	0	1657.35	1421.27	1539.05	1784.74	1492.25	1353.66	1
A_33_P3416563	ref|NM_016108|ens|ENST00000344492|ens|ENST00000458219|ens|ENST00000367598	hs|chr6:143654522-143654581	0	AIG1	NM_016108	ref|Homo sapiens androgen-induced 1 (AIG1), mRNA [NM_016108]	AIG1	51390	-0.342811	0.788504	0.270763	0.987258	0	1963.25	1548.03	1717.59	2244.05	1519	1577.61	1
A_23_P70785	ref|NM_001624|ens|ENST00000369066|ens|ENST00000285105|gb|CR600498	hs|chr6:107017763-107017822	0	AIM1	NM_001624	ref|Homo sapiens absent in melanoma 1 (AIM1), mRNA [NM_001624]	AIM1	202	1.13939	2.20287	0.0673856	0.987258	0	56.4651	124.385	75.6194	42.1625	101.443	152.517	1
A_33_P3327642	ref|NM_001039775|ens|ENST00000374211|ens|ENST00000374208|ens|ENST00000308182	hs|chr1:26648513-26648454	0	AIM1L	NM_001039775	ref|Homo sapiens absent in melanoma 1-like (AIM1L), mRNA [NM_001039775]	AIM1L	55057	-0.185996	0.879042	0.631238	0.987258	0	45.2199	39.7502	57.2474	35.7194	35.6334	44.3426	0
A_24_P308229	ref|NM_001039775|ens|ENST00000520372|ens|ENST00000308182|gb|BC136870	hs|chr1:26658099-26658040	0	AIM1L	NM_001039775	ref|Homo sapiens absent in melanoma 1-like (AIM1L), mRNA [NM_001039775]	AIM1L	55057	-0.242276	0.84541	0.501626	0.987258	0	54.9026	46.4152	43.9841	68.5314	47.3429	45.5057	0
A_32_P44394	ref|NM_004833|ens|ENST00000368130|gb|AF024714|gb|BC010940	hs|chr1:159033365-159033306	0	AIM2	NM_004833	ref|Homo sapiens absent in melanoma 2 (AIM2), mRNA [NM_004833]	AIM2	9447	0.0675932	1.04797	0.776586	0.989802	0	36.293	38.0339	36.4946	36.0926	38.1796	37.8887	0
A_23_P121686	ref|NM_004757|ref|NM_001142416|ref|NM_001142415|ens|ENST00000358008	hs|chr4:107258100-107258159	0	AIMP1	NM_004757	ref|Homo sapiens aminoacyl tRNA synthetase complex-interacting multifunctional protein 1 (AIMP1), transcript variant 1, mRNA [NM_004757]	AIMP1	9255	-0.0374242	0.974393	0.894136	0.996482	0	5017.17	4888.7	4506.13	5586.17	4528.37	5277.69	1
A_23_P121686	ref|NM_004757|ref|NM_001142416|ref|NM_001142415|ens|ENST00000358008	hs|chr4:107258100-107258159	0	AIMP1	NM_004757	ref|Homo sapiens aminoacyl tRNA synthetase complex-interacting multifunctional protein 1 (AIMP1), transcript variant 1, mRNA [NM_004757]	AIMP1	9255	-0.0664231	0.955003	0.808544	0.991275	0	5117.53	4887.25	4672.79	5604.59	4529.21	5273.6	1
A_23_P121686	ref|NM_004757|ref|NM_001142416|ref|NM_001142415|ens|ENST00000358008	hs|chr4:107258100-107258159	0	AIMP1	NM_004757	ref|Homo sapiens aminoacyl tRNA synthetase complex-interacting multifunctional protein 1 (AIMP1), transcript variant 1, mRNA [NM_004757]	AIMP1	9255	-0.0791951	0.946586	0.77986	0.989802	0	5463.48	5171.66	4811.32	6204.04	4969.93	5381.57	1
A_23_P121686	ref|NM_004757|ref|NM_001142416|ref|NM_001142415|ens|ENST00000358008	hs|chr4:107258100-107258159	0	AIMP1	NM_004757	ref|Homo sapiens aminoacyl tRNA synthetase complex-interacting multifunctional protein 1 (AIMP1), transcript variant 1, mRNA [NM_004757]	AIMP1	9255	-0.107188	0.928396	0.681199	0.987258	0	5762.73	5350.1	5364.97	6189.98	5077.06	5637.81	1
A_23_P121686	ref|NM_004757|ref|NM_001142416|ref|NM_001142415|ens|ENST00000358008	hs|chr4:107258100-107258159	0	AIMP1	NM_004757	ref|Homo sapiens aminoacyl tRNA synthetase complex-interacting multifunctional protein 1 (AIMP1), transcript variant 1, mRNA [NM_004757]	AIMP1	9255	-0.109341	0.927011	0.702436	0.987258	0	5729.09	5310.93	5243.06	6260.17	4794.51	5882.97	1
A_23_P121686	ref|NM_004757|ref|NM_001142416|ref|NM_001142415|ens|ENST00000358008	hs|chr4:107258100-107258159	0	AIMP1	NM_004757	ref|Homo sapiens aminoacyl tRNA synthetase complex-interacting multifunctional protein 1 (AIMP1), transcript variant 1, mRNA [NM_004757]	AIMP1	9255	-0.118504	0.921142	0.664726	0.987258	0	5595.4	5154.16	5067.11	6178.77	4887.85	5434.97	1
A_23_P121686	ref|NM_004757|ref|NM_001142416|ref|NM_001142415|ens|ENST00000358008	hs|chr4:107258100-107258159	0	AIMP1	NM_004757	ref|Homo sapiens aminoacyl tRNA synthetase complex-interacting multifunctional protein 1 (AIMP1), transcript variant 1, mRNA [NM_004757]	AIMP1	9255	-0.120713	0.919733	0.645067	0.987258	0	5632.42	5180.32	5170.18	6135.99	5051.7	5312.23	1
A_23_P121686	ref|NM_004757|ref|NM_001142416|ref|NM_001142415|ens|ENST00000358008	hs|chr4:107258100-107258159	0	AIMP1	NM_004757	ref|Homo sapiens aminoacyl tRNA synthetase complex-interacting multifunctional protein 1 (AIMP1), transcript variant 1, mRNA [NM_004757]	AIMP1	9255	-0.127251	0.915575	0.63658	0.987258	0	5244.72	4801.93	4847.5	5674.49	4490.14	5135.38	1
A_23_P121686	ref|NM_004757|ref|NM_001142416|ref|NM_001142415|ens|ENST00000358008	hs|chr4:107258100-107258159	0	AIMP1	NM_004757	ref|Homo sapiens aminoacyl tRNA synthetase complex-interacting multifunctional protein 1 (AIMP1), transcript variant 1, mRNA [NM_004757]	AIMP1	9255	-0.127881	0.915175	0.623902	0.987258	0	5716.81	5231.88	5269.33	6202.28	5103.31	5363.69	1
A_23_P121686	ref|NM_004757|ref|NM_001142416|ref|NM_001142415|ens|ENST00000358008	hs|chr4:107258100-107258159	0	AIMP1	NM_004757	ref|Homo sapiens aminoacyl tRNA synthetase complex-interacting multifunctional protein 1 (AIMP1), transcript variant 1, mRNA [NM_004757]	AIMP1	9255	-0.232372	0.851234	0.44094	0.987258	0	5547.01	4721.81	4844.01	6352.04	4942.03	4511.4	1
A_23_P70991	ref|NM_006303|ens|ENST00000223029|gb|AK313037|gb|AB590717	hs|chr7:6063038-6063097	0	AIMP2	NM_006303	ref|Homo sapiens aminoacyl tRNA synthetase complex-interacting multifunctional protein 2 (AIMP2), mRNA [NM_006303]	AIMP2	7965	-0.0699221	0.952689	0.885549	0.996037	0	4644.39	4424.66	3231.42	6675.19	4133.13	4736.76	1
A_23_P75380	ref|NM_003977|ens|ENST00000279146|gb|AB529203|gb|CR593870	hs|chr11:67257891-67258280	0	AIP	NM_003977	ref|Homo sapiens aryl hydrocarbon receptor interacting protein (AIP), mRNA [NM_003977]	AIP	9049	-0.506339	0.704007	0.340157	0.987258	0	6132.7	4317.46	4890.52	7690.39	5845.66	3188.77	1
A_33_P3226620	ref|NM_014336|ref|NM_001033055|ref|NM_001033054|ens|ENST00000444243	hs|chr17:6327119-6327060	0	AIPL1	NM_014336	ref|Homo sapiens aryl hydrocarbon receptor interacting protein-like 1 (AIPL1), transcript variant 1, mRNA [NM_014336]	AIPL1	23746	-0.140943	0.906926	0.605927	0.987258	0	37.0839	33.6324	36.9679	37.2002	37.5053	30.1594	0
A_23_P68740	ref|NM_000658|ref|NM_000383|ens|ENST00000337909|ens|ENST00000468282	hs|chr21:45717745-45717804	0	AIRE	NM_000658	ref|Homo sapiens autoimmune regulator (AIRE), transcript variant AIRE-2, mRNA [NM_000658]	AIRE	326	-1.02876	0.49013	0.396538	0.987258	0	228.074	111.786	86.3894	602.129	126.276	98.9584	1
A_33_P3225948	ref|NM_001042478|ens|ENST00000378190|gb|AL049673	hs|chr1:4837750-4837809	0	AJAP1	NM_001042478	ref|Homo sapiens adherens junctions associated protein 1 (AJAP1), transcript variant 2, mRNA [NM_001042478]	AJAP1	55966	-0.181636	0.881702	0.605069	0.987258	0	39.1148	34.4876	33.4259	45.772	29.6632	40.0968	0
A_23_P23155	ref|NM_018836|ens|ENST00000378191|gb|AL049672|gb|AF175409	hs|chr1:4842908-4842967	0	AJAP1	NM_018836	ref|Homo sapiens adherens junctions associated protein 1 (AJAP1), transcript variant 1, mRNA [NM_018836]	AJAP1	55966	-0.469078	0.722426	0.250436	0.987258	0	54.649	39.4799	43.068	69.3441	37.2439	41.8501	0
A_23_P217088	ref|NM_000476|ens|ENST00000223836|ens|ENST00000373156|ens|ENST00000413016	hs|chr9:130630712-130630653	0	AK1	NM_000476	ref|Homo sapiens adenylate kinase 1 (AK1), mRNA [NM_000476]	AK1	203	-0.543079	0.686305	0.379243	0.987258	0	5359.21	3678.05	3434.2	8363.27	3238.28	4177.55	1
A_24_P278192	ref|NM_000476|ens|ENST00000373176	hs|chr9:130629235-130629176	0	AK1	NM_000476	ref|Homo sapiens adenylate kinase 1 (AK1), mRNA [NM_000476]	AK1	203	-0.669902	0.628549	0.296929	0.987258	0	601.788	378.254	391.592	924.811	312.198	458.285	1
A_24_P500891	ref|NM_013411|ref|NM_001199199|ref|NR_037591|ens|ENST00000373449	hs|chr1:33475717-33475658	0	AK2	NM_013411	ref|Homo sapiens adenylate kinase 2 (AK2), transcript variant 2, mRNA [NM_013411]	AK2	204	0.147003	1.10727	0.633979	0.987258	0	2660.54	2945.93	2254.75	3139.36	2957.46	2934.44	1
A_33_P3392580	ref|NM_013411|ref|NM_001199199|ref|NR_037591|ens|ENST00000373449	hs|chr1:33473692-33473633	0	AK2	NM_013411	ref|Homo sapiens adenylate kinase 2 (AK2), transcript variant 2, mRNA [NM_013411]	AK2	204	0.143045	1.10423	0.840162	0.992672	0	488.202	539.089	807.284	295.238	403.169	720.83	1
A_24_P179903	ref|NM_001625|ref|NR_037592|ens|ENST00000398192|ens|ENST00000354858	hs|chr1:33478726-33478667	0	AK2	NM_001625	ref|Homo sapiens adenylate kinase 2 (AK2), transcript variant 1, mRNA [NM_001625]	AK2	204	-0.615862	0.65254	0.133201	0.987258	0	10533.3	6873.42	8579.68	12931.8	6446.96	7328.08	1
A_23_P200404	ref|NM_001625|ref|NR_037592|ens|ENST00000354858|ens|ENST00000480134	hs|chr1:33478807-33478748	0	AK2	NM_001625	ref|Homo sapiens adenylate kinase 2 (AK2), transcript variant 1, mRNA [NM_001625]	AK2	204	-0.636926	0.643082	0.0908885	0.987258	0	7144.15	4594.27	6144.73	8306.12	4382.12	4816.7	1
A_33_P3263061	ref|NM_016282|ref|NM_001199852|ref|NM_001199854|ref|NM_001199856	hs|chr9:4711217-4711158	0	AK3	NM_016282	ref|Homo sapiens adenylate kinase 3 (AK3), nuclear gene encoding mitochondrial protein, transcript variant 1, mRNA [NM_016282]	AK3	50808	0.707033	1.63244	0.176523	0.987258	0	4817.68	7864.58	6690.92	3468.88	7342.94	8423.29	1
A_24_P247106	ref|NM_016282|ref|NM_001199852|ref|NM_001199854|ref|NM_001199856	hs|chr9:4712513-4712454	0	AK3	NM_016282	ref|Homo sapiens adenylate kinase 3 (AK3), nuclear gene encoding mitochondrial protein, transcript variant 1, mRNA [NM_016282]	AK3	50808	0.572629	1.48723	0.344437	0.987258	0	913.669	1358.84	1427.31	584.869	1322.98	1395.66	1
A_32_P108655	ref|NM_001005353|ref|NM_203464|ref|NM_013410|ens|ENST00000395334	hs|chr1:65692632-65692691	0	AK4	NM_001005353	ref|Homo sapiens adenylate kinase 4 (AK4), nuclear gene encoding mitochondrial protein, transcript variant 5, mRNA [NM_001005353]	AK4	205	0.520237	1.43419	0.625637	0.987258	0	2558.38	3669.2	2237.46	2925.32	1523.7	8835.78	1
A_24_P342632	ref|NM_174858|ref|NM_012093|ens|ENST00000344720|ens|ENST00000354567	hs|chr1:78025046-78025105	0	AK5	NM_174858	ref|Homo sapiens adenylate kinase 5 (AK5), transcript variant 1, mRNA [NM_174858]	AK5	26289	0.953451	1.9365	0.0986422	0.987258	0	65.7714	127.366	91.807	47.1192	139.578	116.223	1
A_33_P3307253	ref|NM_174858|ref|NM_012093|ens|ENST00000317704|ens|ENST00000466114	hs|chr1:77763572-77763631	0	AK5	NM_174858	ref|Homo sapiens adenylate kinase 5 (AK5), transcript variant 1, mRNA [NM_174858]	AK5	26289	0.16203	1.11886	0.887092	0.996348	0	379.853	425.003	147.14	980.624	524.975	344.069	1
A_23_P105963	ref|NM_152327|ens|ENST00000267584|gb|AK057426|gb|BC035256	hs|chr14:96953277-96953336	0	AK7	NM_152327	ref|Homo sapiens adenylate kinase 7 (AK7), mRNA [NM_152327]	AK7	122481	0.0842061	1.0601	0.798001	0.990291	0	38.9071	41.2455	47.2736	32.0212	39.9866	42.5441	0
A_23_P105963	ref|NM_152327|ens|ENST00000267584|gb|AK057426|gb|BC035256	hs|chr14:96953277-96953336	0	AK7	NM_152327	ref|Homo sapiens adenylate kinase 7 (AK7), mRNA [NM_152327]	AK7	122481	0.0241318	1.01687	0.920034	0.99697	0	40.3824	41.0635	38.9932	41.821	41.427	40.7032	0
A_23_P105963	ref|NM_152327|ens|ENST00000267584|gb|AK057426|gb|BC035256	hs|chr14:96953277-96953336	0	AK7	NM_152327	ref|Homo sapiens adenylate kinase 7 (AK7), mRNA [NM_152327]	AK7	122481	0.0178305	1.01244	0.944373	0.99697	0	42.9095	43.4431	39.7318	46.3413	44.9289	42.0065	0
A_23_P105963	ref|NM_152327|ens|ENST00000267584|gb|AK057426|gb|BC035256	hs|chr14:96953277-96953336	0	AK7	NM_152327	ref|Homo sapiens adenylate kinase 7 (AK7), mRNA [NM_152327]	AK7	122481	0.0121652	1.00847	0.966991	0.997724	0	39.8298	40.167	36.2505	43.7624	35.6472	45.2599	0
A_23_P105963	ref|NM_152327|ens|ENST00000267584|gb|AK057426|gb|BC035256	hs|chr14:96953277-96953336	0	AK7	NM_152327	ref|Homo sapiens adenylate kinase 7 (AK7), mRNA [NM_152327]	AK7	122481	-0.00943562	0.993481	0.968654	0.998075	0	39.5151	39.2575	40.4641	38.5883	38.2312	40.3114	0
A_23_P105963	ref|NM_152327|ens|ENST00000267584|gb|AK057426|gb|BC035256	hs|chr14:96953277-96953336	0	AK7	NM_152327	ref|Homo sapiens adenylate kinase 7 (AK7), mRNA [NM_152327]	AK7	122481	-0.00952382	0.99342	0.971413	0.99841	0	43.5379	43.2515	39.3432	48.1799	44.5391	42.0011	0
A_23_P105963	ref|NM_152327|ens|ENST00000267584|gb|AK057426|gb|BC035256	hs|chr14:96953277-96953336	0	AK7	NM_152327	ref|Homo sapiens adenylate kinase 7 (AK7), mRNA [NM_152327]	AK7	122481	-0.114516	0.923692	0.637191	0.987258	0	43.7517	40.4131	43.0063	44.5101	39.5631	41.2814	0
A_23_P105963	ref|NM_152327|ens|ENST00000267584|gb|AK057426|gb|BC035256	hs|chr14:96953277-96953336	0	AK7	NM_152327	ref|Homo sapiens adenylate kinase 7 (AK7), mRNA [NM_152327]	AK7	122481	-0.131634	0.912797	0.680173	0.987258	0	47.5948	43.4444	39.7095	57.0461	42.9482	43.9464	0
A_23_P105963	ref|NM_152327|ens|ENST00000267584|gb|AK057426|gb|BC035256	hs|chr14:96953277-96953336	0	AK7	NM_152327	ref|Homo sapiens adenylate kinase 7 (AK7), mRNA [NM_152327]	AK7	122481	-0.136969	0.909428	0.67526	0.987258	0	45.3343	41.2283	48.9735	41.9656	49.1033	34.6163	0
A_23_P105963	ref|NM_152327|ens|ENST00000267584|gb|AK057426|gb|BC035256	hs|chr14:96953277-96953336	0	AK7	NM_152327	ref|Homo sapiens adenylate kinase 7 (AK7), mRNA [NM_152327]	AK7	122481	-0.171635	0.887836	0.539736	0.987258	0	46.2169	41.0331	46.0381	46.3965	46.1089	36.516	0
A_23_P83200	ref|NM_152572|ens|ENST00000467161|ens|ENST00000477396|ens|ENST00000298545	hs|chr9:135601142-135601083	0	AK8	NM_152572	ref|Homo sapiens adenylate kinase 8 (AK8), mRNA [NM_152572]	AK8	158067	-0.95309	0.516525	0.413466	0.987258	0	218.712	112.97	85.2843	560.887	114.622	111.342	1
A_33_P3324428	ref|NM_003488|ens|ENST00000314126|ens|ENST00000337714|ens|ENST00000427138	hs|chr17:55184479-55184538	0	AKAP1	NM_003488	ref|Homo sapiens A kinase (PRKA) anchor protein 1 (AKAP1), nuclear gene encoding mitochondrial protein, mRNA [NM_003488]	AKAP1	8165	0.576323	1.49104	0.377941	0.987258	0	71.7529	106.987	117.688	43.7469	107.878	106.103	1
A_32_P132438	ref|NM_003488|ens|ENST00000481416|ens|ENST00000337714|ens|ENST00000427138	hs|chr17:55198512-55198571	0	AKAP1	NM_003488	ref|Homo sapiens A kinase (PRKA) anchor protein 1 (AKAP1), nuclear gene encoding mitochondrial protein, mRNA [NM_003488]	AKAP1	8165	0.305288	1.23567	0.379808	0.987258	0	1345.06	1662.05	1623.36	1114.47	1567.06	1762.79	1
A_23_P317105	ref|NM_007202|ens|ENST00000395536|ens|ENST00000225737|gb|U00957	hs|chr17:19809041-19808982	0	AKAP10	NM_007202	ref|Homo sapiens A kinase (PRKA) anchor protein 10 (AKAP10), nuclear gene encoding mitochondrial protein, mRNA [NM_007202]	AKAP10	11216	0.334846	1.26124	0.585282	0.987258	0	256.534	323.551	409.241	160.809	361.938	289.236	1
A_23_P204929	ref|NM_016248|ens|ENST00000025301|gb|AF176555|gb|AB014529	hs|chr13:42897130-42897189	0	AKAP11	NM_016248	ref|Homo sapiens A kinase (PRKA) anchor protein 11 (AKAP11), mRNA [NM_016248]	AKAP11	11215	1.07291	2.10367	0.282412	0.987258	0	1514.38	3185.76	3241.45	707.508	2897.12	3503.16	1
A_33_P3409447	ref|NM_016248|ens|ENST00000025301|gb|BC156135|gb|BC172498	hs|chr13:42877096-42877155	0	AKAP11	NM_016248	ref|Homo sapiens A kinase (PRKA) anchor protein 11 (AKAP11), mRNA [NM_016248]	AKAP11	11215	0.920979	1.8934	0.359011	0.987258	0	197.969	374.835	437.5	89.5813	373.685	375.989	1
A_23_P111311	ref|NM_144497|ref|NM_005100|ens|ENST00000253332|ens|ENST00000354675	hs|chr6:151674814-151674873	0	AKAP12	NM_144497	ref|Homo sapiens A kinase (PRKA) anchor protein 12 (AKAP12), transcript variant 2, mRNA [NM_144497]	AKAP12	9590	2.42835	5.38278	0.031278	0.987258	0	143.258	771.127	264.712	77.5293	888.198	669.487	1
A_23_P111311	ref|NM_144497|ref|NM_005100|ens|ENST00000253332|ens|ENST00000354675	hs|chr6:151674814-151674873	0	AKAP12	NM_144497	ref|Homo sapiens A kinase (PRKA) anchor protein 12 (AKAP12), transcript variant 2, mRNA [NM_144497]	AKAP12	9590	2.23328	4.70201	0.00888375	0.987258	0	149.828	704.491	210.162	106.814	770.721	643.952	1
A_23_P111311	ref|NM_144497|ref|NM_005100|ens|ENST00000253332|ens|ENST00000354675	hs|chr6:151674814-151674873	0	AKAP12	NM_144497	ref|Homo sapiens A kinase (PRKA) anchor protein 12 (AKAP12), transcript variant 2, mRNA [NM_144497]	AKAP12	9590	2.22653	4.68007	0.00798509	0.987258	0	149.939	701.726	206.932	108.643	764.958	643.721	1
A_23_P111311	ref|NM_144497|ref|NM_005100|ens|ENST00000253332|ens|ENST00000354675	hs|chr6:151674814-151674873	0	AKAP12	NM_144497	ref|Homo sapiens A kinase (PRKA) anchor protein 12 (AKAP12), transcript variant 2, mRNA [NM_144497]	AKAP12	9590	2.15852	4.46458	0.0211189	0.987258	0	173.162	773.094	273.768	109.527	871.811	685.554	1
A_23_P111311	ref|NM_144497|ref|NM_005100|ens|ENST00000253332|ens|ENST00000354675	hs|chr6:151674814-151674873	0	AKAP12	NM_144497	ref|Homo sapiens A kinase (PRKA) anchor protein 12 (AKAP12), transcript variant 2, mRNA [NM_144497]	AKAP12	9590	2.12282	4.35545	0.015408	0.987258	0	170.679	743.386	252.045	115.58	843.425	655.212	1
A_23_P111311	ref|NM_144497|ref|NM_005100|ens|ENST00000253332|ens|ENST00000354675	hs|chr6:151674814-151674873	0	AKAP12	NM_144497	ref|Homo sapiens A kinase (PRKA) anchor protein 12 (AKAP12), transcript variant 2, mRNA [NM_144497]	AKAP12	9590	2.10195	4.2929	0.0131207	0.987258	0	157.631	676.694	226.904	109.507	751.95	608.969	1
A_23_P111311	ref|NM_144497|ref|NM_005100|ens|ENST00000253332|ens|ENST00000354675	hs|chr6:151674814-151674873	0	AKAP12	NM_144497	ref|Homo sapiens A kinase (PRKA) anchor protein 12 (AKAP12), transcript variant 2, mRNA [NM_144497]	AKAP12	9590	2.05199	4.14679	0.0130851	0.987258	0	179.208	743.137	253.027	126.925	842.556	655.448	1
A_23_P111311	ref|NM_144497|ref|NM_005100|ens|ENST00000253332|ens|ENST00000354675	hs|chr6:151674814-151674873	0	AKAP12	NM_144497	ref|Homo sapiens A kinase (PRKA) anchor protein 12 (AKAP12), transcript variant 2, mRNA [NM_144497]	AKAP12	9590	2.04436	4.12489	0.0151223	0.987258	0	179.942	742.243	260.063	124.505	837.856	657.541	1
A_23_P111311	ref|NM_144497|ref|NM_005100|ens|ENST00000253332|ens|ENST00000354675	hs|chr6:151674814-151674873	0	AKAP12	NM_144497	ref|Homo sapiens A kinase (PRKA) anchor protein 12 (AKAP12), transcript variant 2, mRNA [NM_144497]	AKAP12	9590	2.00348	4.00966	0.0162857	0.987258	0	181.968	729.631	264.127	125.366	817.147	651.488	1
A_23_P111311	ref|NM_144497|ref|NM_005100|ens|ENST00000253332|ens|ENST00000354675	hs|chr6:151674814-151674873	0	AKAP12	NM_144497	ref|Homo sapiens A kinase (PRKA) anchor protein 12 (AKAP12), transcript variant 2, mRNA [NM_144497]	AKAP12	9590	1.98088	3.94734	0.00552291	0.987258	0	179.198	707.357	218.672	146.85	800.38	625.146	1
A_23_P214897	ref|NM_144497|ref|NM_005100|ens|ENST00000490177|ens|ENST00000253332	hs|chr6:151670006-151670065	0	AKAP12	NM_144497	ref|Homo sapiens A kinase (PRKA) anchor protein 12 (AKAP12), transcript variant 2, mRNA [NM_144497]	AKAP12	9590	1.95098	3.86636	0.00375098	0.987258	0	1185.18	4582.32	1300.42	1080.15	5349.96	3924.83	1
A_32_P152437	ref|NM_005100|ref|NM_144497|ens|ENST00000402676|ens|ENST00000359755	hs|chr6:151679428-151679487	0	AKAP12	NM_005100	ref|Homo sapiens A kinase (PRKA) anchor protein 12 (AKAP12), transcript variant 1, mRNA [NM_005100]	AKAP12	9590	1.58833	3.00701	0.00797146	0.987258	0	1864.06	5605.26	1847.79	1880.47	6768.38	4642.02	1
A_24_P142095	ref|NM_006738|ref|NM_007200|ref|NM_144767|ens|ENST00000361243	hs|chr15:86292473-86292532	0	AKAP13	NM_006738	ref|Homo sapiens A kinase (PRKA) anchor protein 13 (AKAP13), transcript variant 1, mRNA [NM_006738]	AKAP13	11214	0.851152	1.80394	0.379186	0.987258	0	1236.3	2230.2	2655.8	575.506	2102.94	2365.17	1
A_23_P313652	ref|NM_178813|ref|NM_001008534|ens|ENST00000371425|ens|ENST00000371423	hs|chrX:119053875-119054478	0	AKAP14	NM_178813	ref|Homo sapiens A kinase (PRKA) anchor protein 14 (AKAP14), transcript variant 1, mRNA [NM_178813]	AKAP14	158798	0.0988221	1.0709	0.681258	0.987258	0	38.254	40.9662	37.7743	38.7398	41.4827	40.4561	0
A_33_P3278590	ref|NM_001008535|ens|ENST00000371422|ens|ENST00000394594|gb|AF514782	hs|chrX:119037542-119037601	0	AKAP14	NM_001008535	ref|Homo sapiens A kinase (PRKA) anchor protein 14 (AKAP14), transcript variant 3, mRNA [NM_001008535]	AKAP14	158798	-0.132657	0.91215	0.669627	0.987258	0	49.8804	45.4984	42.1266	59.0613	46.3476	44.6648	0
A_23_P342668	ref|NM_005088|ref|NR_027383|ens|ENST00000474361|ens|ENST00000313871	hs|chrX:1721323-1721382	0	AKAP17A	NM_005088	ref|Homo sapiens A kinase (PRKA) anchor protein 17A (AKAP17A), transcript variant 1, mRNA [NM_005088]	AKAP17A	8227	0.36846	1.29097	0.535391	0.987258	0	2149.59	2775.07	1709.47	2703.04	1864.88	4129.5	1
A_24_P16856	ens|ENST00000381261|gb|BC028151	hs|chrX:1719020-1719079	0	ENST00000381261	ENST00000381261	ens|A kinase (PRKA) anchor protein 17A [Source:HGNC Symbol;Acc:18783] [ENST00000381261]	AKAP17A	8227	-0.157094	0.896829	0.592863	0.987258	0	46.7815	41.955	45.6976	47.8911	36.4654	48.2711	0
A_23_P359043	ref|NM_001004065|ref|NM_001198656|ref|NM_001136562|ref|NM_007203	hs|chr9:112933758-112933817	0	AKAP2	NM_001004065	ref|Homo sapiens A kinase (PRKA) anchor protein 2 (AKAP2), transcript variant 1, mRNA [NM_001004065]	AKAP2	11217	1.31368	2.48575	0.435142	0.987258	0	154.259	383.449	605.48	39.3006	309.686	474.782	1
A_23_P14035	ref|NM_006422|ens|ENST00000228850|gb|AK292451|gb|AF087003	hs|chr12:4735719-4725059	0	AKAP3	NM_006422	ref|Homo sapiens A kinase (PRKA) anchor protein 3 (AKAP3), mRNA [NM_006422]	AKAP3	10566	-0.253488	0.838866	0.395797	0.987258	0	39.2712	32.9432	44.1408	34.9387	30.8553	35.1725	0
A_23_P11081	ref|NM_003886|ref|NM_139289|ens|ENST00000376064|ens|ENST00000481402	hs|chrX:49955496-49955437	0	AKAP4	NM_003886	ref|Homo sapiens A kinase (PRKA) anchor protein 4 (AKAP4), transcript variant 1, mRNA [NM_003886]	AKAP4	8852	0.132605	1.09627	0.629206	0.987258	0	37.7695	41.4056	36.4157	39.1736	46.0739	37.2102	0
A_23_P11081	ref|NM_003886|ref|NM_139289|ens|ENST00000376064|ens|ENST00000481402	hs|chrX:49955496-49955437	0	AKAP4	NM_003886	ref|Homo sapiens A kinase (PRKA) anchor protein 4 (AKAP4), transcript variant 1, mRNA [NM_003886]	AKAP4	8852	0.104212	1.07491	0.690273	0.987258	0	34.1814	36.7418	32.8325	35.5857	39.8401	33.8845	0
A_23_P11081	ref|NM_003886|ref|NM_139289|ens|ENST00000376064|ens|ENST00000481402	hs|chrX:49955496-49955437	0	AKAP4	NM_003886	ref|Homo sapiens A kinase (PRKA) anchor protein 4 (AKAP4), transcript variant 1, mRNA [NM_003886]	AKAP4	8852	0.0956503	1.06855	0.694415	0.987258	0	34.893	37.2848	34.4271	35.3653	35.9828	38.634	0
A_23_P11081	ref|NM_003886|ref|NM_139289|ens|ENST00000376064|ens|ENST00000481402	hs|chrX:49955496-49955437	0	AKAP4	NM_003886	ref|Homo sapiens A kinase (PRKA) anchor protein 4 (AKAP4), transcript variant 1, mRNA [NM_003886]	AKAP4	8852	0.0773428	1.05507	0.780856	0.989802	0	36.8304	38.8588	33.1995	40.8584	41.6242	36.2771	0
A_23_P11081	ref|NM_003886|ref|NM_139289|ens|ENST00000376064|ens|ENST00000481402	hs|chrX:49955496-49955437	0	AKAP4	NM_003886	ref|Homo sapiens A kinase (PRKA) anchor protein 4 (AKAP4), transcript variant 1, mRNA [NM_003886]	AKAP4	8852	0.0659206	1.04675	0.786962	0.989802	0	36.1792	37.8707	34.5386	37.8978	37.7308	38.0111	0
A_23_P11081	ref|NM_003886|ref|NM_139289|ens|ENST00000376064|ens|ENST00000481402	hs|chrX:49955496-49955437	0	AKAP4	NM_003886	ref|Homo sapiens A kinase (PRKA) anchor protein 4 (AKAP4), transcript variant 1, mRNA [NM_003886]	AKAP4	8852	0.0578662	1.04093	0.818587	0.991737	0	33.673	35.0511	35.106	32.2986	32.9814	37.2507	0
A_23_P11081	ref|NM_003886|ref|NM_139289|ens|ENST00000376064|ens|ENST00000481402	hs|chrX:49955496-49955437	0	AKAP4	NM_003886	ref|Homo sapiens A kinase (PRKA) anchor protein 4 (AKAP4), transcript variant 1, mRNA [NM_003886]	AKAP4	8852	0.038703	1.02719	0.874066	0.995156	0	36.3749	37.3639	36.2121	36.5384	39.3105	35.5137	0
A_23_P11081	ref|NM_003886|ref|NM_139289|ens|ENST00000376064|ens|ENST00000481402	hs|chrX:49955496-49955437	0	AKAP4	NM_003886	ref|Homo sapiens A kinase (PRKA) anchor protein 4 (AKAP4), transcript variant 1, mRNA [NM_003886]	AKAP4	8852	-0.0250195	0.982807	0.917248	0.99697	0	38.0509	37.3967	37.5743	38.5335	38.7666	36.0752	0
A_23_P11081	ref|NM_003886|ref|NM_139289|ens|ENST00000376064|ens|ENST00000481402	hs|chrX:49955496-49955437	0	AKAP4	NM_003886	ref|Homo sapiens A kinase (PRKA) anchor protein 4 (AKAP4), transcript variant 1, mRNA [NM_003886]	AKAP4	8852	-0.0946392	0.936506	0.714347	0.987258	0	39.3024	36.8069	37.0107	41.736	39.0878	34.6592	0
A_23_P11081	ref|NM_003886|ref|NM_139289|ens|ENST00000376064|ens|ENST00000481402	hs|chrX:49955496-49955437	0	AKAP4	NM_003886	ref|Homo sapiens A kinase (PRKA) anchor protein 4 (AKAP4), transcript variant 1, mRNA [NM_003886]	AKAP4	8852	-0.179889	0.882771	0.490298	0.987258	0	39.1698	34.5779	38.3724	39.9837	32.212	37.1176	0
A_33_P3417920	ref|NM_003886|ref|NM_139289|ens|ENST00000376064|ens|ENST00000481402	hs|chrX:49957774-49957715	0	AKAP4	NM_003886	ref|Homo sapiens A kinase (PRKA) anchor protein 4 (AKAP4), transcript variant 1, mRNA [NM_003886]	AKAP4	8852	-1.20301	0.434368	0.325168	0.987258	0	166.223	72.2019	63.308	436.439	74.685	69.8014	1
A_33_P3394380	ref|NM_004857|ens|ENST00000320636|ens|ENST00000430028|gb|BC057229	hs|chr14:64935925-64935981	0	AKAP5	NM_004857	ref|Homo sapiens A kinase (PRKA) anchor protein 5 (AKAP5), mRNA [NM_004857]	AKAP5	9495	0.672562	1.5939	0.0820997	0.987258	0	52.5469	83.7545	55.2256	49.998	71.7022	97.8326	0
A_23_P106103	ref|NM_004857|ens|ENST00000320636|ens|ENST00000430028|gb|AK315336	hs|chr14:64936246-64936305	0	AKAP5	NM_004857	ref|Homo sapiens A kinase (PRKA) anchor protein 5 (AKAP5), mRNA [NM_004857]	AKAP5	9495	0.503553	1.4177	0.120156	0.987258	0	37.8617	53.6766	41.6352	34.4302	51.1538	56.3237	0
A_23_P106103	ref|NM_004857|ens|ENST00000320636|ens|ENST00000430028|gb|AK315336	hs|chr14:64936246-64936305	0	AKAP5	NM_004857	ref|Homo sapiens A kinase (PRKA) anchor protein 5 (AKAP5), mRNA [NM_004857]	AKAP5	9495	0.461452	1.37693	0.119965	0.987258	0	35.9692	49.527	36.7804	35.176	47.2847	51.8756	0
A_23_P106103	ref|NM_004857|ens|ENST00000320636|ens|ENST00000430028|gb|AK315336	hs|chr14:64936246-64936305	0	AKAP5	NM_004857	ref|Homo sapiens A kinase (PRKA) anchor protein 5 (AKAP5), mRNA [NM_004857]	AKAP5	9495	0.339118	1.26498	0.238591	0.987258	0	40.8965	51.7333	40.2027	41.6022	47.4071	56.4544	0
A_23_P106103	ref|NM_004857|ens|ENST00000320636|ens|ENST00000430028|gb|AK315336	hs|chr14:64936246-64936305	0	AKAP5	NM_004857	ref|Homo sapiens A kinase (PRKA) anchor protein 5 (AKAP5), mRNA [NM_004857]	AKAP5	9495	0.336267	1.26249	0.356515	0.987258	0	37.0284	46.7478	44.119	31.0773	41.3237	52.8838	0
A_23_P106103	ref|NM_004857|ens|ENST00000320636|ens|ENST00000430028|gb|AK315336	hs|chr14:64936246-64936305	0	AKAP5	NM_004857	ref|Homo sapiens A kinase (PRKA) anchor protein 5 (AKAP5), mRNA [NM_004857]	AKAP5	9495	0.191736	1.14214	0.496321	0.987258	0	40.2414	45.9611	42.0031	38.5535	41.2309	51.2341	0
A_23_P106103	ref|NM_004857|ens|ENST00000320636|ens|ENST00000430028|gb|AK315336	hs|chr14:64936246-64936305	0	AKAP5	NM_004857	ref|Homo sapiens A kinase (PRKA) anchor protein 5 (AKAP5), mRNA [NM_004857]	AKAP5	9495	0.184816	1.13667	0.5195	0.987258	0	42.7919	48.6404	39.9685	45.8148	43.7029	54.1357	0
A_23_P106103	ref|NM_004857|ens|ENST00000320636|ens|ENST00000430028|gb|AK315336	hs|chr14:64936246-64936305	0	AKAP5	NM_004857	ref|Homo sapiens A kinase (PRKA) anchor protein 5 (AKAP5), mRNA [NM_004857]	AKAP5	9495	0.16579	1.12178	0.513564	0.987258	0	41.7458	46.8296	40.4889	43.0417	44.626	49.1421	0
A_23_P106103	ref|NM_004857|ens|ENST00000320636|ens|ENST00000430028|gb|AK315336	hs|chr14:64936246-64936305	0	AKAP5	NM_004857	ref|Homo sapiens A kinase (PRKA) anchor protein 5 (AKAP5), mRNA [NM_004857]	AKAP5	9495	0.158381	1.11603	0.5465	0.987258	0	41.5692	46.3926	44.55	38.7878	44.262	48.6258	0
A_23_P106103	ref|NM_004857|ens|ENST00000320636|ens|ENST00000430028|gb|AK315336	hs|chr14:64936246-64936305	0	AKAP5	NM_004857	ref|Homo sapiens A kinase (PRKA) anchor protein 5 (AKAP5), mRNA [NM_004857]	AKAP5	9495	0.12814	1.09288	0.610403	0.987258	0	39.8803	43.5846	41.6727	38.1651	41.8231	45.4202	0
A_23_P106103	ref|NM_004857|ens|ENST00000320636|ens|ENST00000430028|gb|AK315336	hs|chr14:64936246-64936305	0	AKAP5	NM_004857	ref|Homo sapiens A kinase (PRKA) anchor protein 5 (AKAP5), mRNA [NM_004857]	AKAP5	9495	-0.304853	0.809525	0.483226	0.987258	0	54.27	43.9329	40.4342	72.84	41.2616	46.7771	0
A_23_P14351	ref|NM_004274|gb|U17195|gb|AB002309|gb|BC150288	hs|chr14:33301563-33301622	0	AKAP6	NM_004274	ref|Homo sapiens A kinase (PRKA) anchor protein 6 (AKAP6), mRNA [NM_004274]	AKAP6	9472	0.0229648	1.01605	0.928419	0.99697	0	35.1566	35.7207	38.2384	32.3232	35.7472	35.6942	0
A_23_P259594	ref|NM_016377|ref|NM_138633|ref|NM_004842|ens|ENST00000431975	hs|chr6:131604361-131604420	0	AKAP7	NM_016377	ref|Homo sapiens A kinase (PRKA) anchor protein 7 (AKAP7), transcript variant gamma, mRNA [NM_016377]	AKAP7	9465	-0.162981	0.893178	0.583584	0.987258	0	617.755	551.765	702.707	543.073	592.113	514.166	1
A_33_P3417950	ref|NM_005858|ens|ENST00000269701|gb|AL050160	hs|chr19:15464414-15464355	0	AKAP8	NM_005858	ref|Homo sapiens A kinase (PRKA) anchor protein 8 (AKAP8), mRNA [NM_005858]	AKAP8	10270	0.275526	1.21043	0.423756	0.987258	0	1633.4	1977.12	1989.09	1341.31	1947.74	2006.94	1
A_23_P153767	ref|NM_014371|ens|ENST00000397410|ens|ENST00000263378|gb|AB451469	hs|chr19:15508018-15491422	0	AKAP8L	NM_014371	ref|Homo sapiens A kinase (PRKA) anchor protein 8-like (AKAP8L), mRNA [NM_014371]	AKAP8L	26993	-0.239021	0.84732	0.586223	0.987258	0	2524.45	2139.01	3402.77	1872.84	2342.76	1952.98	1
A_33_P3380211	ref|NM_005751|ref|NM_147185|ens|ENST00000265737|ens|ENST00000358100	hs|chr7:91709254-91709313	0	AKAP9	NM_005751	ref|Homo sapiens A kinase (PRKA) anchor protein (yotiao) 9 (AKAP9), transcript variant 2, mRNA [NM_005751]	AKAP9	10142	1.27349	2.41745	0.231246	0.987258	0	553.708	1338.56	1233.02	248.653	1293.8	1384.87	1
A_23_P309261	ref|NM_005751|ref|NM_147185|ens|ENST00000487258|ens|ENST00000356239	hs|chr7:91739783-91739842	0	AKAP9	NM_005751	ref|Homo sapiens A kinase (PRKA) anchor protein (yotiao) 9 (AKAP9), transcript variant 2, mRNA [NM_005751]	AKAP9	10142	0.601585	1.51738	0.202634	0.987258	0	2041.96	3098.43	2736.71	1523.58	2949.56	3254.81	1
A_23_P123108	ens|ENST00000493453|ens|ENST00000394565|gb|AF026245	hs|chr7:91670394-91670453	0	ENST00000493453	ENST00000493453	ens|A kinase (PRKA) anchor protein (yotiao) 9 [Source:HGNC Symbol;Acc:379] [ENST00000394565]	AKAP9	10142	0.425694	1.34322	0.345574	0.987258	0	57.2784	76.9373	77.195	42.5003	72.8316	81.2746	0
A_33_P3380196	gb|BC015533|ens|ENST00000394564	hs|chr7:91625275-91625334	0	AKAP9	BC015533	gb|Homo sapiens A kinase (PRKA) anchor protein (yotiao) 9, mRNA (cDNA clone IMAGE:3914749), complete cds. [BC015533]	AKAP9	10142	0.261042	1.19834	0.337224	0.987258	0	39.4728	47.302	40.0518	38.9022	51.0766	43.8063	0
A_33_P3285799	ens|ENST00000368950|gb|AK131244|gb|BC087860|ens|ENST00000355283	hs|chr6:109849795-109849736	0	ENST00000368950	ENST00000368950	ens|adenylate kinase domain containing 1 [Source:HGNC Symbol;Acc:33814] [ENST00000368950]	AKD1	221264	-0.0240968	0.983436	0.972329	0.99841	0	79.9681	78.6435	52.1801	122.554	114.615	53.9614	1
A_33_P3384078	gb|AK131244|gb|BC087860|ens|ENST00000355283|ens|ENST00000491875	hs|chr6:109848901-109848842	0	AKD1	AK131244	gb|Homo sapiens cDNA FLJ16163 fis, clone BRCAN2014229. [AK131244]	AKD1	221264	-0.30284	0.810655	0.519467	0.987258	0	49.4184	40.0613	62.5621	39.0361	31.402	51.1085	0
A_23_P348749	ref|NM_145025|ens|ENST00000285397|gb|AK055538|gb|BC022031	hs|chr6:109953475-109953416	0	AKD1	NM_145025	ref|Homo sapiens adenylate kinase domain containing 1 (AKD1), transcript variant 2, mRNA [NM_145025]	AKD1	221264	-0.434828	0.739782	0.215183	0.987258	0	81.4958	60.2891	97.003	68.4676	59.2038	61.3944	0
A_23_P392476	ref|NM_001145128|ens|ENST00000424296|ens|ENST00000321784|gb|BC101714	hs|chr6:109814560-109814501	0	AKD1	NM_001145128	ref|Homo sapiens adenylate kinase domain containing 1 (AKD1), transcript variant 1, mRNA [NM_001145128]	AKD1	221264	-0.665293	0.630561	0.191101	0.987258	0	64.2467	40.5115	87.3797	47.238	36.2116	45.3219	0
A_23_P53152	ref|NM_182901|ref|NM_020642|ens|ENST00000396648|ens|ENST00000309377	hs|chr11:8940888-8940947	0	C11orf17	NM_182901	ref|Homo sapiens chromosome 11 open reading frame 17 (C11orf17), transcript variant 1, mRNA [NM_182901]	AKIP1	56672	-0.580416	0.668771	0.24588	0.987258	0	1937.82	1295.96	1413.63	2656.39	1442.71	1164.14	1
A_33_P3354267	ref|NM_024595|ref|NM_001136275|ens|ENST00000372984|ens|ENST00000432648	hs|chr1:39471205-39471264	0	AKIRIN1	NM_024595	ref|Homo sapiens akirin 1 (AKIRIN1), transcript variant 1, mRNA [NM_024595]	AKIRIN1	79647	0.395308	1.31522	0.50162	0.987258	0	6252.66	8223.65	9383.65	4166.37	6770.05	9989.35	1
A_33_P3294404	ref|NM_024595|ref|NM_001136275|ens|ENST00000372975|ens|ENST00000372984	hs|chr1:39469031-39469090	0	AKIRIN1	NM_024595	ref|Homo sapiens akirin 1 (AKIRIN1), transcript variant 1, mRNA [NM_024595]	AKIRIN1	79647	-0.0181431	0.987503	0.95958	0.997354	0	1625.72	1605.4	1574.09	1679.04	1273.13	2024.38	1
A_23_P256148	ref|NM_024595|ref|NM_001136275|ref|NR_024390|ens|ENST00000372976	hs|chr1:39469807-39469866	0	AKIRIN1	NM_024595	ref|Homo sapiens akirin 1 (AKIRIN1), transcript variant 1, mRNA [NM_024595]	AKIRIN1	79647	-0.105882	0.929237	0.775707	0.989802	0	2235.81	2077.6	2153.05	2321.76	1627.28	2652.53	1
A_23_P428827	ref|NM_018064|ens|ENST00000257787|gb|AK001204|gb|AB528683	hs|chr6:88391436-88391377	0	AKIRIN2	NM_018064	ref|Homo sapiens akirin 2 (AKIRIN2), mRNA [NM_018064]	AKIRIN2	55122	-0.0757667	0.948838	0.755753	0.9898	0	1092.93	1037.01	1134.7	1052.7	1059.77	1014.75	1
A_23_P19243	ref|NR_002767|gb|AL525197	hs|chr6:88410191-88410132	0	NCRNA00120	NR_002767	ref|Homo sapiens non-protein coding RNA 120 (NCRNA00120), non-coding RNA [NR_002767]	AKIRIN2-AS1	55389	0.609502	1.52573	0.462786	0.987258	0	130.523	199.144	233.027	73.1087	274.476	144.487	1
A_24_P912439	ens|ENST00000312033|gb|AB075848|gb|AY703041|gb|AY703042	hs|chr9:117121825-117121766	0	ENST00000312033	ENST00000312033	ens|AT-hook transcription factor [Source:HGNC Symbol;Acc:24108] [ENST00000312033]	AKNA	80709	0.228213	1.17138	0.500711	0.987258	0	42.5753	49.872	51.1159	35.4618	46.3456	53.6668	0
A_33_P3220045	ens|ENST00000394574|gb|AK126136	hs|chr9:117138769-117138710	0	ENST00000394574	ENST00000394574	ens|AT-hook transcription factor [Source:HGNC Symbol;Acc:24108] [ENST00000394574]	AKNA	80709	-0.0146157	0.98992	0.951777	0.997078	0	39.0014	38.6083	40.5873	37.4775	38.0201	39.2055	0
A_33_P3220047	ref|NM_030767|ens|ENST00000394574|ens|ENST00000312033|ens|ENST00000374075	hs|chr9:117138898-117138839	0	AKNA	NM_030767	ref|Homo sapiens AT-hook transcription factor (AKNA), mRNA [NM_030767]	AKNA	80709	-0.126549	0.91602	0.670803	0.987258	0	46.8465	42.9124	54.1047	40.5621	44.9827	40.9373	0
A_33_P3297853	ref|NM_030767|ens|ENST00000374088|ens|ENST00000307564|ens|ENST00000394582	hs|chr9:117098466-117098407	0	AKNA	NM_030767	ref|Homo sapiens AT-hook transcription factor (AKNA), mRNA [NM_030767]	AKNA	80709	-0.15576	0.897659	0.604939	0.987258	0	43.8954	39.4031	37.6646	51.1568	39.8409	38.9701	0
A_33_P3263569	ref|NM_152763|ens|ENST00000474186|ens|ENST00000370001|ens|ENST00000466413	hs|chr1:109358710-109358651	0	AKNAD1	NM_152763	ref|Homo sapiens AKNA domain containing 1 (AKNAD1), mRNA [NM_152763]	AKNAD1	254268	-0.235183	0.849577	0.477199	0.987258	0	54.5689	46.3605	65.6788	45.3383	46.5354	46.1863	0
A_33_P3241081	ref|NM_152763|ens|ENST00000357393|ens|ENST00000369994|ens|ENST00000369995	hs|chr1:109366052-109365993	0	AKNAD1	NM_152763	ref|Homo sapiens AKNA domain containing 1 (AKNAD1), mRNA [NM_152763]	AKNAD1	254268	-0.44874	0.732682	0.305947	0.987258	0	120.361	88.1863	90.6457	159.817	85.6874	90.7581	1
A_24_P79755	ref|NM_006066|ref|NM_153326|ens|ENST00000481885|ens|ENST00000434299	hs|chr1:46032273-46032332	0	AKR1A1	NM_006066	ref|Homo sapiens aldo-keto reductase family 1, member A1 (aldehyde reductase) (AKR1A1), transcript variant 1, mRNA [NM_006066]	AKR1A1	10327	-0.177313	0.884349	0.781113	0.989802	0	2111.8	1867.56	1346.13	3312.97	2388.22	1460.42	1
A_23_P258190	ref|NM_001628|ens|ENST00000494491|ens|ENST00000465351|ens|ENST00000434222	hs|chr7:134132097-134130061	0	AKR1B1	NM_001628	ref|Homo sapiens aldo-keto reductase family 1, member B1 (aldose reductase) (AKR1B1), mRNA [NM_001628]	AKR1B1	231	-0.386654	0.764902	0.612399	0.987258	0	22484.3	17198.3	40201.4	12575.2	21269.9	13906	1
A_23_P93641	ref|NM_020299|ens|ENST00000359579|ens|ENST00000498818|ens|ENST00000496435	hs|chr7:134225939-134225998	0	AKR1B10	NM_020299	ref|Homo sapiens aldo-keto reductase family 1, member B10 (aldose reductase) (AKR1B10), mRNA [NM_020299]	AKR1B10	57016	-0.710097	0.611279	0.294743	0.987258	0	433.504	264.992	316.81	593.18	179.297	391.643	1
A_24_P129341	ref|NM_020299|ens|ENST00000359579|ens|ENST00000498818|ens|ENST00000496435	hs|chr7:134225799-134225858	0	AKR1B10	NM_020299	ref|Homo sapiens aldo-keto reductase family 1, member B10 (aldose reductase) (AKR1B10), mRNA [NM_020299]	AKR1B10	57016	-0.8708	0.546843	0.299502	0.987258	0	465.953	254.804	272.641	796.331	179.698	361.301	1
A_33_P3380992	ref|NM_001080538|ref|NM_020299|ens|ENST00000418096|ens|ENST00000423958	hs|chr7:134262468-134262527	0	AKR1B15	NM_001080538	ref|Homo sapiens aldo-keto reductase family 1, member B15 (AKR1B15), mRNA [NM_001080538]	AKR1B15	441282	-0.530404	0.692361	0.359441	0.987258	0	263.706	182.58	196.578	353.756	134.309	248.199	1
A_24_P152968	ref|NM_001353|ref|NM_001135241|ens|ENST00000439082|ens|ENST00000434459	hs|chr10:5005636-5005695	0	AKR1C1	NM_001353	ref|Homo sapiens aldo-keto reductase family 1, member C1 (dihydrodiol dehydrogenase 1; 20-alpha (3-alpha)-hydroxysteroid dehydrogenase) (AKR1C1), mRNA [NM_001353]	AKR1C1	1645	-0.495085	0.70952	0.25403	0.987258	0	1376.33	976.536	1106.26	1712.34	1148.2	830.54	1
A_23_P257971	ref|NM_001353|ref|NM_001354|ref|NM_205845|ens|ENST00000460124	hs|chr10:5019910-5019969	0	AKR1C1	NM_001353	ref|Homo sapiens aldo-keto reductase family 1, member C1 (dihydrodiol dehydrogenase 1; 20-alpha (3-alpha)-hydroxysteroid dehydrogenase) (AKR1C1), mRNA [NM_001353]	AKR1C1	1645	-0.622098	0.649725	0.147453	0.987258	0	2710.37	1760.99	2240.41	3278.9	2036.22	1522.97	1
A_23_P138541	ref|NM_003739|ens|ENST00000380554|gb|AK315411|gb|BT007286	hs|chr10:5147789-5147848	0	AKR1C3	NM_003739	ref|Homo sapiens aldo-keto reductase family 1, member C3 (3-alpha hydroxysteroid dehydrogenase, type II) (AKR1C3), mRNA [NM_003739]	AKR1C3	8644	-0.748838	0.595083	0.142728	0.987258	0	2418.63	1439.28	1850.81	3160.65	1224.75	1691.39	1
A_33_P3272291	ref|NM_001818|ens|ENST00000397357|ens|ENST00000380448|ens|ENST00000263126	hs|chr10:5246396-5246455	0	AKR1C4	NM_001818	ref|Homo sapiens aldo-keto reductase family 1, member C4 (chlordecone reductase; 3-alpha hydroxysteroid dehydrogenase, type I; dihydrodiol dehydrogenase 4) (AKR1C4), mRNA [NM_001818]	AKR1C4	1109	0.0710693	1.0505	0.781464	0.989802	0	50.5507	53.1033	48.513	52.674	49.4586	57.0165	0
A_23_P149926	ref|NM_001818|ens|ENST00000380448|ens|ENST00000263126|gb|AK314988	hs|chr10:5246427-5247749	0	AKR1C4	NM_001818	ref|Homo sapiens aldo-keto reductase family 1, member C4 (chlordecone reductase; 3-alpha hydroxysteroid dehydrogenase, type I; dihydrodiol dehydrogenase 4) (AKR1C4), mRNA [NM_001818]	AKR1C4	1109	-0.0498403	0.966043	0.868109	0.994566	0	37.9613	36.6723	43.5347	33.1015	39.8389	33.7574	0
A_33_P3329028	ref|NR_027916|ens|ENST00000334314|ens|ENST00000472691|ens|ENST00000380510	hs|chr10:5203879-5203820	0	AKR1CL1	NR_027916	ref|Homo sapiens aldo-keto reductase family 1, member C-like 1 (AKR1CL1), non-coding RNA [NR_027916]	AKR1CL1	340811	-0.267681	0.830654	0.525106	0.987258	0	55.9419	46.4683	42.0616	74.4026	44.0884	48.9767	0
A_23_P382000	ref|NM_005989|ref|NM_001190907|ref|NM_001190906|ens|ENST00000242375	hs|chr7:137802295-137802354	0	AKR1D1	NM_005989	ref|Homo sapiens aldo-keto reductase family 1, member D1 (delta 4-3-ketosteroid-5-beta-reductase) (AKR1D1), transcript variant 1, mRNA [NM_005989]	AKR1D1	6718	0.0305917	1.02143	0.902306	0.996521	0	32.9208	33.6264	30.9743	34.9897	34.614	32.667	0
A_33_P3392142	ens|ENST00000297463|ens|ENST00000468877|gb|AK058142|tc|NP404668	hs|chr7:137791984-137792043	0	ENST00000297463	ENST00000297463	ens|aldo-keto reductase family 1, member D1 (delta 4-3-ketosteroid-5-beta-reductase) [Source:HGNC Symbol;Acc:388] [ENST00000297463]	AKR1D1	6718	-0.26985	0.829406	0.402478	0.987258	0	38.6392	32.0476	32.6759	45.6909	32.3851	31.7135	0
A_33_P3480561	ref|NM_001040177|ens|ENST00000462718|ens|ENST00000441590|ens|ENST00000345253	hs|chr10:4875583-4875642	0	AKR1E2	NM_001040177	ref|Homo sapiens aldo-keto reductase family 1, member E2 (AKR1E2), mRNA [NM_001040177]	AKR1E2	83592	-0.119898	0.920253	0.668329	0.987258	0	67.3426	61.9722	61.9366	73.2205	67.8858	56.5738	0
A_23_P115356	ref|NM_003689|ens|ENST00000424403|ens|ENST00000235835|gb|CR606766	hs|chr1:19630652-19630593	0	AKR7A2	NM_003689	ref|Homo sapiens aldo-keto reductase family 7, member A2 (aflatoxin aldehyde reductase) (AKR7A2), mRNA [NM_003689]	AKR7A2	8574	-0.0578785	0.960676	0.929728	0.99697	0	6176.58	5933.69	3728.1	10233.1	7046.32	4996.75	1
A_23_P115356	ref|NM_003689|ens|ENST00000424403|ens|ENST00000235835|gb|CR606766	hs|chr1:19630652-19630593	0	AKR7A2	NM_003689	ref|Homo sapiens aldo-keto reductase family 7, member A2 (aflatoxin aldehyde reductase) (AKR7A2), mRNA [NM_003689]	AKR7A2	8574	-0.104606	0.930059	0.873823	0.995156	0	7002.29	6512.54	4308.96	11379.1	8147.81	5205.48	1
A_23_P115356	ref|NM_003689|ens|ENST00000424403|ens|ENST00000235835|gb|CR606766	hs|chr1:19630652-19630593	0	AKR7A2	NM_003689	ref|Homo sapiens aldo-keto reductase family 7, member A2 (aflatoxin aldehyde reductase) (AKR7A2), mRNA [NM_003689]	AKR7A2	8574	-0.109205	0.927099	0.865509	0.994566	0	7153.43	6631.93	4507.69	11352	8451.1	5204.36	1
A_23_P115356	ref|NM_003689|ens|ENST00000424403|ens|ENST00000235835|gb|CR606766	hs|chr1:19630652-19630593	0	AKR7A2	NM_003689	ref|Homo sapiens aldo-keto reductase family 7, member A2 (aflatoxin aldehyde reductase) (AKR7A2), mRNA [NM_003689]	AKR7A2	8574	-0.13044	0.913553	0.835558	0.992314	0	6729.84	6148.07	4238.33	10686	7542.1	5011.7	1
A_23_P115356	ref|NM_003689|ens|ENST00000424403|ens|ENST00000235835|gb|CR606766	hs|chr1:19630652-19630593	0	AKR7A2	NM_003689	ref|Homo sapiens aldo-keto reductase family 7, member A2 (aflatoxin aldehyde reductase) (AKR7A2), mRNA [NM_003689]	AKR7A2	8574	-0.139123	0.908071	0.831428	0.992005	0	7238.83	6573.37	4528.04	11572.5	8392.52	5148.54	1
A_23_P115356	ref|NM_003689|ens|ENST00000424403|ens|ENST00000235835|gb|CR606766	hs|chr1:19630652-19630593	0	AKR7A2	NM_003689	ref|Homo sapiens aldo-keto reductase family 7, member A2 (aflatoxin aldehyde reductase) (AKR7A2), mRNA [NM_003689]	AKR7A2	8574	-0.141998	0.906263	0.825421	0.991737	0	7170.58	6498.43	4489.28	11453.3	8140.43	5187.65	1
A_23_P115356	ref|NM_003689|ens|ENST00000424403|ens|ENST00000235835|gb|CR606766	hs|chr1:19630652-19630593	0	AKR7A2	NM_003689	ref|Homo sapiens aldo-keto reductase family 7, member A2 (aflatoxin aldehyde reductase) (AKR7A2), mRNA [NM_003689]	AKR7A2	8574	-0.163394	0.892922	0.804201	0.990671	0	6837.28	6105.16	4168.52	11214.6	7449.46	5003.44	1
A_23_P115356	ref|NM_003689|ens|ENST00000424403|ens|ENST00000235835|gb|CR606766	hs|chr1:19630652-19630593	0	AKR7A2	NM_003689	ref|Homo sapiens aldo-keto reductase family 7, member A2 (aflatoxin aldehyde reductase) (AKR7A2), mRNA [NM_003689]	AKR7A2	8574	-0.167896	0.89014	0.789191	0.989802	0	7394.18	6581.85	4695.71	11643.4	8188.6	5290.37	1
A_23_P115356	ref|NM_003689|ens|ENST00000424403|ens|ENST00000235835|gb|CR606766	hs|chr1:19630652-19630593	0	AKR7A2	NM_003689	ref|Homo sapiens aldo-keto reductase family 7, member A2 (aflatoxin aldehyde reductase) (AKR7A2), mRNA [NM_003689]	AKR7A2	8574	-0.170593	0.888477	0.781805	0.989802	0	6973.39	6195.7	4432.45	10970.9	7510.48	5111.09	1
A_23_P115356	ref|NM_003689|ens|ENST00000424403|ens|ENST00000235835|gb|CR606766	hs|chr1:19630652-19630593	0	AKR7A2	NM_003689	ref|Homo sapiens aldo-keto reductase family 7, member A2 (aflatoxin aldehyde reductase) (AKR7A2), mRNA [NM_003689]	AKR7A2	8574	-0.194159	0.874082	0.791288	0.989864	0	7018.69	6134.91	4136.52	11909	8177.56	4602.49	1
A_23_P316812	ref|NR_002796|gb|AJ277796	hs|chr1:113466600-113466659	0	AKR7A2P1	NR_002796	ref|Homo sapiens aldo-keto reductase family 7, member A2 pseudogene 1 (AKR7A2P1), non-coding RNA [NR_002796]	AKR7A2P1	246182	-0.357745	0.780384	0.642731	0.987258	0	497.417	388.176	269.619	917.678	446.478	337.487	1
A_23_P103968	ref|NM_012067|ens|ENST00000361640|gb|AF040639|gb|EU176235	hs|chr1:19611233-19610614	0	AKR7A3	NM_012067	ref|Homo sapiens aldo-keto reductase family 7, member A3 (aflatoxin aldehyde reductase) (AKR7A3), mRNA [NM_012067]	AKR7A3	22977	-0.274417	0.826784	0.698182	0.987258	0	1902.16	1572.68	1094.86	3304.75	1837.36	1346.13	1
A_33_P3218004	ref|NM_201252|ref|NM_001145289|gb|BC035351	hs|chr1:19592551-19592492	0	AKR7L	NM_201252	ref|Homo sapiens aldo-keto reductase family 7-like (AKR7L), transcript variant 1, mRNA [NM_201252]	AKR7L	246181	0.739687	1.66981	0.184131	0.987258	0	61.9937	103.518	89.5216	42.9306	104.654	102.394	1
A_33_P3217998	ref|NM_201252|ref|NM_001145289|ens|ENST00000429712|gb|AJ278012	hs|chr1:19593853-19593794	0	AKR7L	NM_201252	ref|Homo sapiens aldo-keto reductase family 7-like (AKR7L), transcript variant 1, mRNA [NM_201252]	AKR7L	246181	-0.212869	0.86282	0.770873	0.989802	0	3374.12	2911.25	1940.88	5865.74	3660.03	2315.67	1
A_33_P3275235	ref|NM_005163|ref|NM_001014432|ref|NM_001014431|ens|ENST00000402615	hs|chr14:105236034-105235975	0	AKT1	NM_005163	ref|Homo sapiens v-akt murine thymoma viral oncogene homolog 1 (AKT1), transcript variant 1, mRNA [NM_005163]	AKT1	207	0.0711998	1.05059	0.859649	0.994566	0	3283.79	3449.92	2474.46	4357.85	3438.35	3461.53	1
A_33_P3344201	ref|NM_032375|ref|NM_001098632|ref|NM_001098633|ens|ENST00000391831	hs|chr19:50372646-50372587	0	AKT1S1	NM_032375	ref|Homo sapiens AKT1 substrate 1 (proline-rich) (AKT1S1), transcript variant 1, mRNA [NM_032375]	AKT1S1	84335	-0.370513	0.773507	0.429822	0.987258	0	1810.96	1400.79	1302.64	2517.65	1362.78	1439.87	1
A_33_P3381647	ref|NM_001626|ens|ENST00000392038|gb|FW400145	hs|chr19:40736283-40736224	0	AKT2	NM_001626	ref|Homo sapiens v-akt murine thymoma viral oncogene homolog 2 (AKT2), mRNA [NM_001626]	AKT2	208	0.542402	1.4564	0.129317	0.987258	0	236.563	344.529	223.517	250.37	398.487	297.878	1
A_23_P208870	ref|NM_001626|ens|ENST00000358335|ens|ENST00000476266|ens|ENST00000483166	hs|chr19:40738762-40738703	0	AKT2	NM_001626	ref|Homo sapiens v-akt murine thymoma viral oncogene homolog 2 (AKT2), mRNA [NM_001626]	AKT2	208	0.256264	1.19438	0.318914	0.987258	0	1730.51	2066.89	1756.21	1705.19	2037.69	2096.51	1
A_33_P3400171	ref|NM_001626|ens|ENST00000392037|ens|ENST00000416994|ens|ENST00000456441	hs|chr19:40761134-40761075	0	AKT2	NM_001626	ref|Homo sapiens v-akt murine thymoma viral oncogene homolog 2 (AKT2), mRNA [NM_001626]	AKT2	208	0.232612	1.17496	0.649171	0.987258	0	241.028	283.198	354.925	163.68	279.967	286.466	1
A_24_P110983	ens|ENST00000366539|gb|AK055109|gb|BC019085|gb|AL080074	hs|chr1:243665260-243665201	0	AKT3	ENST00000366539	ens|v-akt murine thymoma viral oncogene homolog 3 (protein kinase B, gamma) [Source:HGNC Symbol;Acc:393] [ENST00000366539]	AKT3	10000	0.692737	1.61635	0.391302	0.987258	0	2680.49	4332.59	5005.55	1435.41	4780.87	3926.35	1
A_23_P160354	ref|NM_181690|ens|ENST00000391844|ens|ENST00000366540|ens|ENST00000336199	hs|chr1:243716200-243716141	0	AKT3	NM_181690	ref|Homo sapiens v-akt murine thymoma viral oncogene homolog 3 (protein kinase B, gamma) (AKT3), transcript variant 2, mRNA [NM_181690]	AKT3	10000	0.147202	1.10742	0.632217	0.987258	0	1018.29	1127.67	1110.5	933.739	1295.87	981.308	1
A_33_P3340990	ref|NM_001012398|ref|NM_022476|ens|ENST00000300245|ens|ENST00000394657	hs|chr16:53525616-53525557	0	AKTIP	NM_001012398	ref|Homo sapiens AKT interacting protein (AKTIP), transcript variant 1, mRNA [NM_001012398]	AKTIP	64400	0.32691	1.25432	0.301291	0.987258	0	252.917	317.24	285.311	224.2	291.515	345.235	1
A_33_P3390731	ref|NM_001012398|ref|NM_022476|ens|ENST00000300245|ens|ENST00000394657	hs|chr16:53526086-53526027	0	AKTIP	NM_001012398	ref|Homo sapiens AKT interacting protein (AKTIP), transcript variant 1, mRNA [NM_001012398]	AKTIP	64400	0.0469682	1.03309	0.875407	0.995242	0	702.465	725.71	603.258	817.986	692.347	760.682	1
A_23_P217114	ref|NM_000031|ens|ENST00000482847|ens|ENST00000277315|ens|ENST00000409155	hs|chr9:116149233-116149174	0	ALAD	NM_000031	ref|Homo sapiens aminolevulinate dehydratase (ALAD), mRNA [NM_000031]	ALAD	210	0.250167	1.18935	0.353897	0.987258	0	671.576	798.735	705.098	639.647	846.968	753.25	1
A_24_P191588	ref|NM_000688|ref|NM_199166|ens|ENST00000469224|ens|ENST00000484952	hs|chr3:52246277-52246336	0	ALAS1	NM_000688	ref|Homo sapiens aminolevulinate, delta-, synthase 1 (ALAS1), transcript variant 1, mRNA [NM_000688]	ALAS1	211	0.00733741	1.0051	0.976673	0.998855	0	1521.85	1529.6	1527.44	1516.27	1422.29	1645.02	1
A_32_P385587	ref|NM_000032|ref|NM_001037968|ref|NM_001037967|ens|ENST00000434091	hs|chrX:55035564-55035505	0	ALAS2	NM_000032	ref|Homo sapiens aminolevulinate, delta-, synthase 2 (ALAS2), nuclear gene encoding mitochondrial protein, transcript variant 1, mRNA [NM_000032]	ALAS2	212	-0.305656	0.809074	0.472463	0.987258	0	93.9618	76.0221	70.8648	124.587	81.4634	70.9443	1
A_23_P257834	ref|NM_000477|ens|ENST00000505649|ens|ENST00000476441|ens|ENST00000415165	hs|chr4:74285342-74286015	0	ALB	NM_000477	ref|Homo sapiens albumin (ALB), mRNA [NM_000477]	ALB	213	0.013096	1.00912	0.955962	0.99735	0	39.2135	39.571	38.6914	39.7426	39.5393	39.6028	0
A_33_P3713357	ref|NM_001627|ens|ENST00000491388|ens|ENST00000472644|ens|ENST00000389926	hs|chr3:105294613-105294672	0	ALCAM	NM_001627	ref|Homo sapiens activated leukocyte cell adhesion molecule (ALCAM), mRNA [NM_001627]	ALCAM	214	0.57606	1.49077	0.640885	0.987258	0	2937.95	4379.81	8280.16	1042.44	4095.53	4683.83	1
A_24_P5743	ref|NM_153329|ref|NM_001145396|ens|ENST00000293350|ens|ENST00000455361	hs|chr19:49972198-49973576	0	ALDH16A1	NM_153329	ref|Homo sapiens aldehyde dehydrogenase 16 family, member A1 (ALDH16A1), transcript variant 1, mRNA [NM_153329]	ALDH16A1	126133	-0.358125	0.780178	0.199996	0.987258	0	654.202	510.394	651.85	656.563	539.566	482.799	1
A_23_P1361	ref|NM_002860|ref|NM_001017423|ens|ENST00000371221|ens|ENST00000371224	hs|chr10:97366196-97366137	0	ALDH18A1	NM_002860	ref|Homo sapiens aldehyde dehydrogenase 18 family, member A1 (ALDH18A1), nuclear gene encoding mitochondrial protein, transcript variant 1, mRNA [NM_002860]	ALDH18A1	5832	0.974575	1.96506	0.0329525	0.987258	0	1648.49	3239.38	1450.22	1873.86	3652.7	2872.83	1
A_23_P83098	ref|NM_000689|ens|ENST00000451134|ens|ENST00000297785|gb|AF003341	hs|chr9:75516195-75516136	0	ALDH1A1	NM_000689	ref|Homo sapiens aldehyde dehydrogenase 1 family, member A1 (ALDH1A1), mRNA [NM_000689]	ALDH1A1	216	1.13307	2.19325	0.618048	0.987258	0	4489.81	9847.28	10788.5	1868.51	55098.6	1759.92	1
A_33_P3379644	ref|NM_000689|ens|ENST00000376939|ens|ENST00000419959|ens|ENST00000482210	hs|chr9:75540460-75540401	0	ALDH1A1	NM_000689	ref|Homo sapiens aldehyde dehydrogenase 1 family, member A1 (ALDH1A1), mRNA [NM_000689]	ALDH1A1	216	0.399926	1.31944	0.805882	0.990825	0	540.099	712.629	631.594	461.859	2855.96	177.818	1
A_24_P73577	ref|NM_170697|ref|NM_003888|ref|NM_170696|ens|ENST00000347587	hs|chr15:58246591-58246532	0	ALDH1A2	NM_170697	ref|Homo sapiens aldehyde dehydrogenase 1 family, member A2 (ALDH1A2), transcript variant 3, mRNA [NM_170697]	ALDH1A2	8854	0.172027	1.12664	0.5115	0.987258	0	31.5442	35.539	29.7305	33.4686	33.7235	37.4522	0
A_23_P205959	ref|NM_000693|ens|ENST00000425801|ens|ENST00000346623|ens|ENST00000415812	hs|chr15:101456503-101456562	0	ALDH1A3	NM_000693	ref|Homo sapiens aldehyde dehydrogenase 1 family, member A3 (ALDH1A3), mRNA [NM_000693]	ALDH1A3	220	0.8699	1.82754	0.305318	0.987258	0	1219.77	2229.17	1136.57	1309.06	1169.46	4249.15	1
A_24_P64233	ref|NM_000692|ens|ENST00000377698|gb|AK297020|gb|BC001619	hs|chr9:38397700-38397759	0	ALDH1B1	NM_000692	ref|Homo sapiens aldehyde dehydrogenase 1 family, member B1 (ALDH1B1), nuclear gene encoding mitochondrial protein, mRNA [NM_000692]	ALDH1B1	219	0.383185	1.30422	0.699463	0.987258	0	2914.01	3800.5	1440.42	5895.1	2450.14	5895.1	1
A_23_P258887	ref|NM_012190|ens|ENST00000462808|ens|ENST00000393434|ens|ENST00000472186	hs|chr3:125826021-125824747	0	ALDH1L1	NM_012190	ref|Homo sapiens aldehyde dehydrogenase 1 family, member L1 (ALDH1L1), mRNA [NM_012190]	ALDH1L1	10840	-0.25511	0.837923	0.574958	0.987258	0	72.2128	60.5088	52.9315	98.5177	67.1265	54.5435	0
A_33_P3282634	ref|NM_001034173|ref|NR_027752|ens|ENST00000258494|gb|BC103934	hs|chr12:105420399-105420340	0	ALDH1L2	NM_001034173	ref|Homo sapiens aldehyde dehydrogenase 1 family, member L2 (ALDH1L2), nuclear gene encoding mitochondrial protein, transcript variant 1, mRNA [NM_001034173]	ALDH1L2	160428	0.533849	1.44779	0.0816093	0.987258	0	599.711	868.253	599.756	599.666	843.819	893.395	1
A_23_P36753	ref|NM_000690|ens|ENST00000261733|ens|ENST00000416293|gb|AK223373	hs|chr12:112247448-112247507	0	ALDH2	NM_000690	ref|Homo sapiens aldehyde dehydrogenase 2 family (mitochondrial) (ALDH2), nuclear gene encoding mitochondrial protein, mRNA [NM_000690]	ALDH2	217	0.0502708	1.03546	0.947296	0.99697	0	2194.21	2272.01	1842.26	2613.38	4160.98	1240.58	1
A_23_P207213	ref|NM_000691|ref|NM_001135168|ref|NM_001135167|ens|ENST00000439102	hs|chr17:19644417-19643743	0	ALDH3A1	NM_000691	ref|Homo sapiens aldehyde dehydrogenase 3 family, member A1 (ALDH3A1), transcript variant 2, mRNA [NM_000691]	ALDH3A1	218	-0.0473736	0.967696	0.842332	0.992672	0	37.1785	35.9775	37.1179	37.2392	35.3582	36.6076	0
A_33_P3238433	ref|NM_001135168|ref|NM_000691|ref|NM_001135167|ens|ENST00000333946	hs|chr17:19641714-19641655	0	ALDH3A1	NM_001135168	ref|Homo sapiens aldehyde dehydrogenase 3 family, member A1 (ALDH3A1), transcript variant 1, mRNA [NM_001135168]	ALDH3A1	218	-1.12618	0.458128	0.346182	0.987258	0	210.802	96.5744	81.6782	544.057	102.229	91.2323	1
A_33_P3336622	ref|NM_001031806|ref|NM_000382|ens|ENST00000176643|ens|ENST00000339618	hs|chr17:19580832-19580891	0	ALDH3A2	NM_001031806	ref|Homo sapiens aldehyde dehydrogenase 3 family, member A2 (ALDH3A2), transcript variant 1, mRNA [NM_001031806]	ALDH3A2	224	0.11832	1.08547	0.824223	0.991737	0	368.369	399.853	524.834	258.549	322.545	495.69	1
A_33_P3336617	ref|NM_000382|ref|NM_001031806|ens|ENST00000404114|ens|ENST00000476965	hs|chr17:19575195-19575254	0	ALDH3A2	NM_000382	ref|Homo sapiens aldehyde dehydrogenase 3 family, member A2 (ALDH3A2), transcript variant 2, mRNA [NM_000382]	ALDH3A2	224	-0.129882	0.913906	0.641014	0.987258	0	1378.22	1259.56	1306.84	1453.5	1130.72	1403.09	1
A_33_P3367447	ref|NM_001161473|ref|NM_000694|ref|NM_001030010|ens|ENST00000007633	hs|chr11:67793516-67793575	0	ALDH3B1	NM_001161473	ref|Homo sapiens aldehyde dehydrogenase 3 family, member B1 (ALDH3B1), transcript variant 3, mRNA [NM_001161473]	ALDH3B1	221	-0.476258	0.71884	0.240592	0.987258	0	545.845	392.375	589.863	505.112	492.89	312.359	1
A_33_P3236563	ref|NM_001161473|ref|NM_000694|ref|NM_001030010|ens|ENST00000316367	hs|chr11:67786661-67786720	0	ALDH3B1	NM_001161473	ref|Homo sapiens aldehyde dehydrogenase 3 family, member B1 (ALDH3B1), transcript variant 3, mRNA [NM_001161473]	ALDH3B1	221	-0.496135	0.709004	0.14781	0.987258	0	292.594	207.45	295.925	289.3	239.814	179.454	1
A_24_P218688	ref|NM_000694|ref|NM_001161473|ref|NM_001030010|ens|ENST00000433100	hs|chr11:67795665-67795724	0	ALDH3B1	NM_000694	ref|Homo sapiens aldehyde dehydrogenase 3 family, member B1 (ALDH3B1), transcript variant 1, mRNA [NM_000694]	ALDH3B1	221	-0.58838	0.665089	0.229559	0.987258	0	1219.42	811.024	1236.62	1202.46	1116.37	589.196	1
A_23_P24311	ref|NM_000695|ref|NM_001031615|ens|ENST00000349015|ens|ENST00000442988	hs|chr11:67430569-67430510	0	ALDH3B2	NM_000695	ref|Homo sapiens aldehyde dehydrogenase 3 family, member B2 (ALDH3B2), transcript variant 1, mRNA [NM_000695]	ALDH3B2	222	-0.0182624	0.987421	0.957033	0.99735	0	54.5388	53.8527	44.2126	67.2766	55.2739	52.4682	0
A_23_P170337	ref|NM_003748|ref|NM_001161504|ref|NM_170726|ens|ENST00000375341	hs|chr1:19198108-19198049	0	ALDH4A1	NM_003748	ref|Homo sapiens aldehyde dehydrogenase 4 family, member A1 (ALDH4A1), nuclear gene encoding mitochondrial protein, transcript variant P5CDhL, mRNA [NM_003748]	ALDH4A1	8659	-0.413336	0.750885	0.273349	0.987258	0	1311	984.411	1078.81	1593.17	895.537	1082.11	1
A_32_P192970	ref|NM_170726|ens|ENST00000432718|ens|ENST00000375334|ens|ENST00000454547	hs|chr1:19209897-19209838	0	ALDH4A1	NM_170726	ref|Homo sapiens aldehyde dehydrogenase 4 family, member A1 (ALDH4A1), nuclear gene encoding mitochondrial protein, transcript variant P5CDhS, mRNA [NM_170726]	ALDH4A1	8659	-0.519104	0.697805	0.435332	0.987258	0	189.703	132.376	116.005	310.222	114.296	153.315	1
A_24_P115007	ref|NM_170740|ref|NM_001080|ens|ENST00000357578|gb|AJ427355	hs|chr6:24536869-24536928	0	ALDH5A1	NM_170740	ref|Homo sapiens aldehyde dehydrogenase 5 family, member A1 (ALDH5A1), nuclear gene encoding mitochondrial protein, transcript variant 1, mRNA [NM_170740]	ALDH5A1	7915	0.0535756	1.03783	0.925159	0.99697	0	56.4948	58.6322	78.6901	40.5599	43.1134	79.7371	0
A_23_P128967	ref|NM_005589|ens|ENST00000350259|gb|AK294243|gb|AK222687	hs|chr14:74527189-74527130	0	ALDH6A1	NM_005589	ref|Homo sapiens aldehyde dehydrogenase 6 family, member A1 (ALDH6A1), nuclear gene encoding mitochondrial protein, mRNA [NM_005589]	ALDH6A1	4329	0.201787	1.15012	0.736916	0.9898	0	730.255	839.882	811.373	657.247	1336.52	527.789	1
A_33_P3330503	ref|NM_001182|gb|AK021800|gb|CR933637	hs|chr5:125879077-125879018	0	ALDH7A1	NM_001182	ref|Homo sapiens aldehyde dehydrogenase 7 family, member A1 (ALDH7A1), mRNA [NM_001182]	ALDH7A1	501	0.503245	1.4174	0.35151	0.987258	0	152.481	216.126	224.866	103.397	215.154	217.102	1
A_23_P70231	ref|NM_001182|ens|ENST00000297542|ens|ENST00000447989|ens|ENST00000437170	hs|chr5:125882063-125880700	0	ALDH7A1	NM_001182	ref|Homo sapiens aldehyde dehydrogenase 7 family, member A1 (ALDH7A1), mRNA [NM_001182]	ALDH7A1	501	0.00024078	1.00017	0.999422	0.999959	0	2545.72	2546.15	2680.45	2417.77	3100.66	2090.8	1
A_24_P283324	ref|NM_022568|ref|NM_001193480|ref|NM_170771|ens|ENST00000367847	hs|chr6:135239669-135239610	0	ALDH8A1	NM_022568	ref|Homo sapiens aldehyde dehydrogenase 8 family, member A1 (ALDH8A1), transcript variant 1, mRNA [NM_022568]	ALDH8A1	64577	0.0302105	1.02116	0.91422	0.996752	0	48.8509	49.8846	55.5084	42.9918	48.488	51.3214	0
A_24_P385280	ref|NM_000696|ens|ENST00000354775|gb|AK301767|gb|BC151140	hs|chr1:165632035-165631976	0	ALDH9A1	NM_000696	ref|Homo sapiens aldehyde dehydrogenase 9 family, member A1 (ALDH9A1), mRNA [NM_000696]	ALDH9A1	223	0.14322	1.10437	0.585613	0.987258	0	1894.47	2092.19	1807.5	1985.62	1944.88	2250.65	1
A_23_P88963	ref|NM_000034|ref|NM_001127617|ref|NM_184043|ref|NM_184041	hs|chr16:30081324-30081470	0	ALDOA	NM_000034	ref|Homo sapiens aldolase A, fructose-bisphosphate (ALDOA), transcript variant 1, mRNA [NM_000034]	ALDOA	226	0.0515319	1.03636	0.869168	0.994566	0	48695.5	50466.3	40840.8	58060.8	49254.5	51707.9	1
A_33_P3853081	gb|M21191	hs|chr10:127354871-127354812	0	ALDOAP2	M21191	gb|Human aldolase pseudogene mRNA, complete cds. [M21191]	ALDOAP2	228	-0.200826	0.870052	0.487411	0.987258	0	48.8445	42.4973	43.1045	55.3489	43.7088	41.3193	0
A_23_P415974	ref|NM_000035|ens|ENST00000374855|ens|ENST00000374853|ens|ENST00000430164	hs|chr9:104183787-104183728	0	ALDOB	NM_000035	ref|Homo sapiens aldolase B, fructose-bisphosphate (ALDOB), mRNA [NM_000035]	ALDOB	229	-0.113659	0.924241	0.757001	0.9898	0	42.6031	39.3755	33.6028	54.014	41.2566	37.5802	0
A_23_P32143	ref|NM_000035|ens|ENST00000374855|ens|ENST00000430164|gb|X00270	hs|chr9:104187253-104187194	0	ALDOB	NM_000035	ref|Homo sapiens aldolase B, fructose-bisphosphate (ALDOB), mRNA [NM_000035]	ALDOB	229	-0.282059	0.822417	0.528674	0.987258	0	59.6022	49.0178	43.526	81.616	46.95	51.1767	0
A_23_P78108	ref|NM_005165|ens|ENST00000395321|ens|ENST00000226253|gb|AK296053	hs|chr17:26900482-26900423	0	ALDOC	NM_005165	ref|Homo sapiens aldolase C, fructose-bisphosphate (ALDOC), mRNA [NM_005165]	ALDOC	230	-0.728828	0.603394	0.323738	0.987258	0	719.947	434.411	514.247	1007.93	679.29	277.81	1
A_24_P565556	ref|NM_019109|gb|BC031095|gb|XR_037586	hs|chr16:5135348-5135407	0	ALG1	NM_019109	ref|Homo sapiens asparagine-linked glycosylation 1, beta-1,4-mannosyltransferase homolog (S. cerevisiae) (ALG1), mRNA [NM_019109]	ALG1	56052	-0.0678609	0.954052	0.942375	0.99697	0	180.715	172.412	364.725	89.5416	248.49	119.626	1
A_32_P169131	ref|NM_019109|gb|BC031095	hs|chr16:5135454-5135512	0	ALG1	NM_019109	ref|Homo sapiens asparagine-linked glycosylation 1, beta-1,4-mannosyltransferase homolog (S. cerevisiae) (ALG1), mRNA [NM_019109]	ALG1	56052	-0.215858	0.861034	0.536942	0.987258	0	1589.44	1368.56	1931.81	1307.75	1259.14	1487.5	1
A_24_P586523	ref|NM_019109|ref|NR_024248|ens|ENST00000262374|ref|XM_003118642	hs|chr16:5133744-5134795	0	ALG1	NM_019109	ref|Homo sapiens asparagine-linked glycosylation 1, beta-1,4-mannosyltransferase homolog (S. cerevisiae) (ALG1), mRNA [NM_019109]	ALG1	56052	-0.230924	0.852089	0.404997	0.987258	0	1338.28	1140.33	1212.14	1477.54	1151.22	1129.54	1
A_23_P66306	ref|NM_019109|ens|ENST00000262374|gb|AB019038|gb|AK075373	hs|chr16:5135196-5135255	0	ALG1	NM_019109	ref|Homo sapiens asparagine-linked glycosylation 1, beta-1,4-mannosyltransferase homolog (S. cerevisiae) (ALG1), mRNA [NM_019109]	ALG1	56052	-0.356526	0.781043	0.488596	0.987258	0	2502.31	1954.41	1884.75	3322.23	1517.42	2517.25	1
A_33_P3230881	ref|NM_032834|ens|ENST00000266483|gb|FV271744|gb|FV272505	hs|chr12:34181056-34181115	0	ALG10	NM_032834	ref|Homo sapiens asparagine-linked glycosylation 10, alpha-1,2-glucosyltransferase homolog (S. pombe) (ALG10), mRNA [NM_032834]	ALG10	84920	1.10888	2.15678	0.134406	0.987258	0	62.3504	134.476	102.513	37.9229	131.94	137.061	1
A_32_P89679	ref|NM_001013620|ens|ENST00000308742	hs|chr12:38722948-38723007	0	ALG10B	NM_001013620	ref|Homo sapiens asparagine-linked glycosylation 10, alpha-1,2-glucosyltransferase homolog B (yeast) (ALG10B), mRNA [NM_001013620]	ALG10B	144245	1.04637	2.06532	0.174718	0.987258	0	143.827	297.049	233.538	88.5773	378.397	233.19	1
A_33_P3230876	ref|NM_001004127|ref|NR_036571|ens|ENST00000519812|ens|ENST00000521508	hs|chr13:52603719-52603778	0	ALG11	NM_001004127	ref|Homo sapiens asparagine-linked glycosylation 11, alpha-1,2-mannosyltransferase homolog (yeast) (ALG11), transcript variant A, mRNA [NM_001004127]	ALG11	440138	0.954947	1.93851	0.489698	0.987258	0	1305.97	2531.63	4060.63	420.023	2206.22	2905.05	1
A_33_P3408599	gb|AK126604	hs|chr22:50297396-50297455	0	AK126604	AK126604	gb|Homo sapiens cDNA FLJ44641 fis, clone BRACE2030039. [AK126604]	ALG12	79087	0.0196572	1.01372	0.936003	0.99697	0	49.0644	49.7375	46.5771	51.6846	48.9487	50.5391	0
A_23_P60718	ref|NM_024105|ens|ENST00000332276|ens|ENST00000330817|gb|CR456369	hs|chr22:50297474-50297415	0	ALG12	NM_024105	ref|Homo sapiens asparagine-linked glycosylation 12, alpha-1,6-mannosyltransferase homolog (S. cerevisiae) (ALG12), mRNA [NM_024105]	ALG12	79087	-0.413049	0.751034	0.241876	0.987258	0	353.225	265.284	294.258	424.009	261.107	269.529	1
A_23_P22672	ref|NM_001099922|ref|NR_033127|ref|NR_033131|ref|NR_033128	hs|chrX:111003779-111003838	0	ALG13	NM_001099922	ref|Homo sapiens asparagine-linked glycosylation 13 homolog (S. cerevisiae) (ALG13), transcript variant 1, mRNA [NM_001099922]	ALG13	79868	0.334795	1.2612	0.507519	0.987258	0	1052.36	1327.24	1181.08	937.677	1890.93	931.585	1
A_23_P11279	ref|NM_018466|ref|NM_001168385|ref|NM_001039210|ref|NR_033134	hs|chrX:110928330-110931172	0	ALG13	NM_018466	ref|Homo sapiens asparagine-linked glycosylation 13 homolog (S. cerevisiae) (ALG13), transcript variant 2, mRNA [NM_018466]	ALG13	79868	-0.501974	0.70614	0.56609	0.987258	0	1147.77	810.486	568.441	2317.52	713.319	920.888	1
A_23_P11279	ref|NM_018466|ref|NM_001168385|ref|NM_001039210|ref|NR_033134	hs|chrX:110928330-110931172	0	ALG13	NM_018466	ref|Homo sapiens asparagine-linked glycosylation 13 homolog (S. cerevisiae) (ALG13), transcript variant 2, mRNA [NM_018466]	ALG13	79868	-0.595303	0.661906	0.48577	0.987258	0	1081.88	716.101	552.384	2118.92	622.8	823.379	1
A_23_P11279	ref|NM_018466|ref|NM_001168385|ref|NM_001039210|ref|NR_033134	hs|chrX:110928330-110931172	0	ALG13	NM_018466	ref|Homo sapiens asparagine-linked glycosylation 13 homolog (S. cerevisiae) (ALG13), transcript variant 2, mRNA [NM_018466]	ALG13	79868	-0.603889	0.657978	0.492575	0.987258	0	1203.08	791.6	601.197	2407.53	679.853	921.715	1
A_23_P11279	ref|NM_018466|ref|NM_001168385|ref|NM_001039210|ref|NR_033134	hs|chrX:110928330-110931172	0	ALG13	NM_018466	ref|Homo sapiens asparagine-linked glycosylation 13 homolog (S. cerevisiae) (ALG13), transcript variant 2, mRNA [NM_018466]	ALG13	79868	-0.610474	0.654982	0.476794	0.987258	0	1278.12	837.147	648.556	2518.82	742.735	943.559	1
A_23_P11279	ref|NM_018466|ref|NM_001168385|ref|NM_001039210|ref|NR_033134	hs|chrX:110928330-110931172	0	ALG13	NM_018466	ref|Homo sapiens asparagine-linked glycosylation 13 homolog (S. cerevisiae) (ALG13), transcript variant 2, mRNA [NM_018466]	ALG13	79868	-0.613229	0.653732	0.475447	0.987258	0	1294.42	846.206	656.134	2553.64	751.357	953.029	1
A_23_P11279	ref|NM_018466|ref|NM_001168385|ref|NM_001039210|ref|NR_033134	hs|chrX:110928330-110931172	0	ALG13	NM_018466	ref|Homo sapiens asparagine-linked glycosylation 13 homolog (S. cerevisiae) (ALG13), transcript variant 2, mRNA [NM_018466]	ALG13	79868	-0.627215	0.647425	0.454818	0.987258	0	1283.74	831.127	663.468	2483.91	743.827	928.674	1
A_23_P11279	ref|NM_018466|ref|NM_001168385|ref|NM_001039210|ref|NR_033134	hs|chrX:110928330-110931172	0	ALG13	NM_018466	ref|Homo sapiens asparagine-linked glycosylation 13 homolog (S. cerevisiae) (ALG13), transcript variant 2, mRNA [NM_018466]	ALG13	79868	-0.631246	0.645619	0.475479	0.987258	0	1298.89	838.586	645.755	2612.61	732.213	960.412	1
A_23_P11279	ref|NM_018466|ref|NM_001168385|ref|NM_001039210|ref|NR_033134	hs|chrX:110928330-110931172	0	ALG13	NM_018466	ref|Homo sapiens asparagine-linked glycosylation 13 homolog (S. cerevisiae) (ALG13), transcript variant 2, mRNA [NM_018466]	ALG13	79868	-0.638793	0.64225	0.477276	0.987258	0	1277.53	820.492	626.258	2606.08	720.979	933.739	1
A_23_P11279	ref|NM_018466|ref|NM_001168385|ref|NM_001039210|ref|NR_033134	hs|chrX:110928330-110931172	0	ALG13	NM_018466	ref|Homo sapiens asparagine-linked glycosylation 13 homolog (S. cerevisiae) (ALG13), transcript variant 2, mRNA [NM_018466]	ALG13	79868	-0.648476	0.637954	0.467367	0.987258	0	1310.47	836.022	647.125	2653.81	734.394	951.715	1
A_23_P11279	ref|NM_018466|ref|NM_001168385|ref|NM_001039210|ref|NR_033134	hs|chrX:110928330-110931172	0	ALG13	NM_018466	ref|Homo sapiens asparagine-linked glycosylation 13 homolog (S. cerevisiae) (ALG13), transcript variant 2, mRNA [NM_018466]	ALG13	79868	-0.695291	0.617585	0.429717	0.987258	0	1165.86	720.015	590.292	2302.63	607.789	852.963	1
A_23_P257423	ref|NM_144988|ens|ENST00000370205|gb|BC011706|gb|AK289395	hs|chr1:95448646-95448587	0	ALG14	NM_144988	ref|Homo sapiens asparagine-linked glycosylation 14 homolog (S. cerevisiae) (ALG14), mRNA [NM_144988]	ALG14	199857	-0.406735	0.754329	0.372265	0.987258	0	2303.28	1737.43	1759.92	3014.4	1485.94	2031.49	1
A_32_P158355	ref|NM_001015050|ref|NM_001195223|ref|NR_024248|ens|ENST00000340333	hs|chr3:125650482-125649415	0	ALG1L	NM_001015050	ref|Homo sapiens asparagine-linked glycosylation 1-like (ALG1L), transcript variant 2, mRNA [NM_001015050]	ALG1L	200810	-0.172455	0.887331	0.524216	0.987258	0	1184.56	1051.1	1126.55	1245.56	965.259	1144.58	1
A_33_P3329644	ref|NM_001136152|ref|NR_024248|ens|ENST00000425059|ens|ENST00000507643	hs|chr3:129817087-129817146	0	ALG1L2	NM_001136152	ref|Homo sapiens asparagine-linked glycosylation 1-like 2 (ALG1L2), mRNA [NM_001136152]	ALG1L2	644974	-0.232466	0.851179	0.422834	0.987258	0	1250.61	1064.5	1111.72	1406.86	1025.13	1105.38	1
A_33_P3324692	ref|NM_001136152|ref|NR_024248|ens|ENST00000503500|ens|ENST00000510394	hs|chr3:129813261-129813320	0	ALG1L2	NM_001136152	ref|Homo sapiens asparagine-linked glycosylation 1-like 2 (ALG1L2), mRNA [NM_001136152]	ALG1L2	644974	-0.479827	0.717064	0.203163	0.987258	0	809.392	580.385	665.971	983.698	550.308	612.106	1
A_33_P3297050	ref|NM_033087|ref|NR_024532|ens|ENST00000238477|ens|ENST00000319033	hs|chr9:101978788-101978729	0	ALG2	NM_033087	ref|Homo sapiens asparagine-linked glycosylation 2, alpha-1,3-mannosyltransferase homolog (S. cerevisiae) (ALG2), transcript variant 1, mRNA [NM_033087]	ALG2	85365	0.470166	1.38527	0.426287	0.987258	0	622.617	862.492	939.97	412.409	729.127	1020.25	1
A_23_P146728	ref|NM_033087|ref|NR_024532|ens|ENST00000476832|ens|ENST00000238477	hs|chr9:101980025-101979966	0	ALG2	NM_033087	ref|Homo sapiens asparagine-linked glycosylation 2, alpha-1,3-mannosyltransferase homolog (S. cerevisiae) (ALG2), transcript variant 1, mRNA [NM_033087]	ALG2	85365	0.208011	1.15509	0.534063	0.987258	0	1783.46	2060.06	2151.74	1478.21	1963.52	2161.35	1
A_24_P414269	ref|NM_005787|ref|NM_001006941|ref|NR_024534|ref|NR_024533	hs|chr3:183960286-183960227	0	ALG3	NM_005787	ref|Homo sapiens asparagine-linked glycosylation 3, alpha-1,3- mannosyltransferase homolog (S. cerevisiae) (ALG3), transcript variant 1, mRNA [NM_005787]	ALG3	10195	-0.532841	0.691192	0.209179	0.987258	0	6886.19	4759.68	5349.96	8863.56	4710.65	4809.23	1
A_23_P151436	ref|NM_013338|ref|NM_001142364|ens|ENST00000486410|ens|ENST00000239891	hs|chr13:37524173-37524114	0	ALG5	NM_013338	ref|Homo sapiens asparagine-linked glycosylation 5, dolichyl-phosphate beta-glucosyltransferase homolog (S. cerevisiae) (ALG5), transcript variant 1, mRNA [NM_013338]	ALG5	29880	-0.386204	0.76514	0.342965	0.987258	0	15679.5	11997.1	20005.6	12289	11000.9	13083.4	1
A_23_P35168	ref|NM_013339|ens|ENST00000494765|ens|ENST00000263440|ens|ENST00000431147	hs|chr1:63902525-63902584	0	ALG6	NM_013339	ref|Homo sapiens asparagine-linked glycosylation 6, alpha-1,3-glucosyltransferase homolog (S. cerevisiae) (ALG6), mRNA [NM_013339]	ALG6	29929	0.672959	1.59434	0.0617515	0.987258	0	437.501	697.525	489.676	390.885	697.354	697.695	1
A_23_P13554	ref|NM_001007027|ref|NM_024079|ens|ENST00000376156|ens|ENST00000299626	hs|chr11:77812147-77812088	0	ALG8	NM_001007027	ref|Homo sapiens asparagine-linked glycosylation 8, alpha-1,3-glucosyltransferase homolog (S. cerevisiae) (ALG8), transcript variant 2, mRNA [NM_001007027]	ALG8	79053	0.0783938	1.05584	0.866488	0.994566	0	5794.74	6118.33	7948.87	4224.37	5273.6	7098.35	1
A_24_P795594	ref|NM_001077691|ref|NM_001077692|ref|NM_024740|ref|NM_001077690	hs|chr11:111653292-111653233	0	ALG9	NM_001077691	ref|Homo sapiens asparagine-linked glycosylation 9, alpha-1,2-mannosyltransferase homolog (S. cerevisiae) (ALG9), transcript variant 3, mRNA [NM_001077691]	ALG9	79796	1.25574	2.38789	0.0194325	0.987258	0	304.965	728.223	265.186	350.71	848.698	624.85	1
A_23_P324304	ref|NM_004304|ens|ENST00000389048|ens|ENST00000442523|ens|ENST00000438993	hs|chr2:29416000-29415941	0	ALK	NM_004304	ref|Homo sapiens anaplastic lymphoma receptor tyrosine kinase (ALK), mRNA [NM_004304]	ALK	238	0.473075	1.38807	0.135209	0.987258	0	32.49	45.0982	33.4788	31.5303	49.7573	40.8753	0
A_23_P14543	ref|NM_006020|ens|ENST00000216489|gb|CR604550|gb|BC015024	hs|chr14:78139939-78139880	0	ALKBH1	NM_006020	ref|Homo sapiens alkB, alkylation repair homolog 1 (E. coli) (ALKBH1), mRNA [NM_006020]	ALKBH1	8846	-0.526744	0.69412	0.0865633	0.987258	0	352.392	244.602	367.476	337.927	245.532	243.675	1
A_32_P28939	ref|NM_001001655|ref|NM_001145374|ref|NM_001145375|ref|NR_026930	hs|chr12:109526142-109526083	0	ALKBH2	NM_001001655	ref|Homo sapiens alkB, alkylation repair homolog 2 (E. coli) (ALKBH2), transcript variant 2, mRNA [NM_001001655]	ALKBH2	121642	-0.252081	0.839684	0.68097	0.987258	0	2243.84	1884.12	1381.17	3645.35	1851.67	1917.14	1
A_23_P35989	ref|NM_139178|ens|ENST00000302708|gb|AK315266|gb|BC103812	hs|chr11:43923132-43923191	0	ALKBH3	NM_139178	ref|Homo sapiens alkB, alkylation repair homolog 3 (E. coli) (ALKBH3), mRNA [NM_139178]	ALKBH3	221120	-0.645183	0.639412	0.168801	0.987258	0	674.036	430.987	507.781	894.726	421.739	440.437	1
A_33_P3225250	ref|NM_139178|ens|ENST00000378840|ens|ENST00000302708|gb|AK315266	hs|chr11:43911306-43911365	0	ALKBH3	NM_139178	ref|Homo sapiens alkB, alkylation repair homolog 3 (E. coli) (ALKBH3), mRNA [NM_139178]	ALKBH3	221120	-0.70227	0.614604	0.152619	0.987258	0	568.487	349.394	424.963	760.483	326.683	373.685	1
A_23_P255523	ref|NM_017621|ens|ENST00000490528|ens|ENST00000292566|gb|AK000020	hs|chr7:102097656-102097597	0	ALKBH4	NM_017621	ref|Homo sapiens alkB, alkylation repair homolog 4 (E. coli) (ALKBH4), mRNA [NM_017621]	ALKBH4	54784	-0.32831	0.796469	0.413239	0.987258	0	724.882	577.346	585.848	896.912	670.347	497.248	1
A_23_P153050	ref|NM_017758|ens|ENST00000399138|ens|ENST00000490106|gb|AK311161	hs|chr17:18112546-18112605	0	ALKBH5	NM_017758	ref|Homo sapiens alkB, alkylation repair homolog 5 (E. coli) (ALKBH5), mRNA [NM_017758]	ALKBH5	54890	0.282478	1.21628	0.421465	0.987258	0	2012.29	2447.52	2464.31	1643.19	2534.48	2363.54	1
A_33_P3239854	ref|NM_017758|ens|ENST00000261650|ens|ENST00000399138|ens|ENST00000490106	hs|chr17:18111754-18111813	0	ALKBH5	NM_017758	ref|Homo sapiens alkB, alkylation repair homolog 5 (E. coli) (ALKBH5), mRNA [NM_017758]	ALKBH5	54890	-0.111842	0.925406	0.64789	0.987258	0	619.448	573.241	614.107	624.835	595.982	551.367	1
A_23_P39402	ref|NM_198867|ref|NM_032878|ens|ENST00000433672|ens|ENST00000481257	hs|chr19:36503981-36502366	0	ALKBH6	NM_198867	ref|Homo sapiens alkB, alkylation repair homolog 6 (E. coli) (ALKBH6), transcript variant 1, mRNA [NM_198867]	ALKBH6	84964	-0.590104	0.664295	0.278043	0.987258	0	804.847	534.656	557.382	1162.18	485.793	588.434	1
A_24_P91472	ref|NM_032306|ens|ENST00000245812|gb|AK311956|gb|AY358858	hs|chr19:6374824-6374883	0	ALKBH7	NM_032306	ref|Homo sapiens alkB, alkylation repair homolog 7 (E. coli) (ALKBH7), mRNA [NM_032306]	ALKBH7	84266	-0.46684	0.723548	0.633463	0.987258	0	6722.11	4863.77	3072.53	14706.7	6050.91	3909.53	1
A_23_P371876	ref|NM_138775|ens|ENST00000260318|ens|ENST00000417449|ens|ENST00000449781	hs|chr11:107375618-107375559	0	ALKBH8	NM_138775	ref|Homo sapiens alkB, alkylation repair homolog 8 (E. coli) (ALKBH8), mRNA [NM_138775]	ALKBH8	91801	0.463943	1.37931	0.480355	0.987258	0	168.387	232.257	279.095	101.593	214.87	251.051	1
A_33_P3318357	ref|NM_138775|ens|ENST00000393100|ens|ENST00000260318|ens|ENST00000449781	hs|chr11:107422595-107422536	0	ALKBH8	NM_138775	ref|Homo sapiens alkB, alkylation repair homolog 8 (E. coli) (ALKBH8), mRNA [NM_138775]	ALKBH8	91801	-0.0648703	0.956031	0.857156	0.994399	0	58.385	55.8179	72.8932	46.7645	51.5193	60.4752	0
A_23_P108734	ref|NM_018436|ens|ENST00000471711|ens|ENST00000403787|ens|ENST00000476389	hs|chr2:3744966-3745025	0	ALLC	NM_018436	ref|Homo sapiens allantoicase (ALLC), transcript variant 1, mRNA [NM_018436]	ALLC	55821	0.133207	1.09673	0.651582	0.987258	0	35.9812	39.4616	41.5629	31.149	40.5493	38.403	0
A_23_P108734	ref|NM_018436|ens|ENST00000471711|ens|ENST00000403787|ens|ENST00000476389	hs|chr2:3744966-3745025	0	ALLC	NM_018436	ref|Homo sapiens allantoicase (ALLC), transcript variant 1, mRNA [NM_018436]	ALLC	55821	0.126241	1.09145	0.604704	0.987258	0	37.1396	40.5358	38.2091	36.1	40.681	40.3912	0
A_23_P108734	ref|NM_018436|ens|ENST00000471711|ens|ENST00000403787|ens|ENST00000476389	hs|chr2:3744966-3745025	0	ALLC	NM_018436	ref|Homo sapiens allantoicase (ALLC), transcript variant 1, mRNA [NM_018436]	ALLC	55821	0.0383271	1.02692	0.889831	0.996482	0	44.7417	45.9462	39.9999	50.0455	48.4971	43.5296	0
A_23_P108734	ref|NM_018436|ens|ENST00000471711|ens|ENST00000403787|ens|ENST00000476389	hs|chr2:3744966-3745025	0	ALLC	NM_018436	ref|Homo sapiens allantoicase (ALLC), transcript variant 1, mRNA [NM_018436]	ALLC	55821	0.0345942	1.02427	0.888301	0.996443	0	35.8057	36.6747	37.9623	33.7716	36.6237	36.7257	0
A_23_P108734	ref|NM_018436|ens|ENST00000471711|ens|ENST00000403787|ens|ENST00000476389	hs|chr2:3744966-3745025	0	ALLC	NM_018436	ref|Homo sapiens allantoicase (ALLC), transcript variant 1, mRNA [NM_018436]	ALLC	55821	0.0303063	1.02123	0.914962	0.996827	0	39.4162	40.253	35.2586	44.0641	43.5347	37.2187	0
A_23_P108734	ref|NM_018436|ens|ENST00000471711|ens|ENST00000403787|ens|ENST00000476389	hs|chr2:3744966-3745025	0	ALLC	NM_018436	ref|Homo sapiens allantoicase (ALLC), transcript variant 1, mRNA [NM_018436]	ALLC	55821	-0.00140585	0.999026	0.995857	0.999959	0	38.0016	37.9646	34	42.474	36.9084	39.0509	0
A_23_P108734	ref|NM_018436|ens|ENST00000471711|ens|ENST00000403787|ens|ENST00000476389	hs|chr2:3744966-3745025	0	ALLC	NM_018436	ref|Homo sapiens allantoicase (ALLC), transcript variant 1, mRNA [NM_018436]	ALLC	55821	-0.00372665	0.99742	0.98776	0.999467	0	40.0204	39.9171	38.2091	41.9175	39.4237	40.4167	0
A_23_P108734	ref|NM_018436|ens|ENST00000471711|ens|ENST00000403787|ens|ENST00000476389	hs|chr2:3744966-3745025	0	ALLC	NM_018436	ref|Homo sapiens allantoicase (ALLC), transcript variant 1, mRNA [NM_018436]	ALLC	55821	-0.00391291	0.997291	0.988418	0.999467	0	38.6168	38.5122	37.6852	39.5714	42.9868	34.5034	0
A_23_P108734	ref|NM_018436|ens|ENST00000471711|ens|ENST00000403787|ens|ENST00000476389	hs|chr2:3744966-3745025	0	ALLC	NM_018436	ref|Homo sapiens allantoicase (ALLC), transcript variant 1, mRNA [NM_018436]	ALLC	55821	-0.0499305	0.965983	0.840299	0.992672	0	40.483	39.1058	39.5071	41.4829	36.945	41.3931	0
A_23_P108734	ref|NM_018436|ens|ENST00000471711|ens|ENST00000403787|ens|ENST00000476389	hs|chr2:3744966-3745025	0	ALLC	NM_018436	ref|Homo sapiens allantoicase (ALLC), transcript variant 1, mRNA [NM_018436]	ALLC	55821	-0.371884	0.772773	0.366998	0.987258	0	47.8645	36.9884	36.8768	62.126	34.9814	39.1104	0
A_23_P312174	ref|NM_015120|ens|ENST00000264448|gb|AX751581|gb|BX647706	hs|chr2:73836752-73836811	0	ALMS1	NM_015120	ref|Homo sapiens Alstrom syndrome 1 (ALMS1), mRNA [NM_015120]	ALMS1	7840	0.685873	1.60868	0.171594	0.987258	0	350.716	564.188	459.192	267.865	479.41	663.956	1
A_33_P3332724	ref|NM_015120|ens|ENST00000377715|ens|ENST00000443750|ens|ENST00000423048	hs|chr2:73682362-73682421	0	ALMS1	NM_015120	ref|Homo sapiens Alstrom syndrome 1 (ALMS1), mRNA [NM_015120]	ALMS1	7840	0.511246	1.42528	0.176651	0.987258	0	57.8588	82.465	70.3021	47.6179	84.6592	80.3276	0
A_23_P435657	ref|NR_003683|ens|ENST00000450720|gb|DQ893051|gb|DQ896299	hs|chr2:73899939-73899998	0	ALMS1P	NR_003683	ref|Homo sapiens Alstrom syndrome 1 pseudogene (ALMS1P), non-coding RNA [NR_003683]	ALMS1P	200420	0.764639	1.69895	0.221758	0.987258	0	70.6197	119.979	108.077	46.1443	108.033	133.245	1
A_23_P152906	ref|NM_000697|ens|ENST00000251535|gb|M62982|gb|M58704	hs|chr17:6913910-6913969	0	ALOX12	NM_000697	ref|Homo sapiens arachidonate 12-lipoxygenase (ALOX12), mRNA [NM_000697]	ALOX12	239	0.0822591	1.05867	0.731633	0.989677	0	40.1857	42.5436	39.5166	40.8662	42.0978	42.9942	0
A_23_P83634	ref|NM_001139|ens|ENST00000319144|gb|AB590845|gb|BC041058	hs|chr17:7978975-7978916	0	ALOX12B	NM_001139	ref|Homo sapiens arachidonate 12-lipoxygenase, 12R type (ALOX12B), mRNA [NM_001139]	ALOX12B	242	-0.769002	0.586823	0.284046	0.987258	0	109.731	64.3925	64.3957	186.982	64.6332	64.1527	1
A_32_P440768	ref|NR_002710|gb|AF020774|gb|BC041851	hs|chr17:6803299-6803358	0	ALOX12P2	NR_002710	ref|Homo sapiens arachidonate 12-lipoxygenase pseudogene 2 (ALOX12P2), non-coding RNA [NR_002710]	ALOX12P2	245	-0.0900076	0.939518	0.728285	0.988902	0	41.4106	38.906	38.1399	44.9619	39.9932	37.8484	0
A_23_P55373	ref|NM_001140|ens|ENST00000293761|gb|AK312557|gb|AB590843	hs|chr17:4534989-4534930	0	ALOX15	NM_001140	ref|Homo sapiens arachidonate 15-lipoxygenase (ALOX15), mRNA [NM_001140]	ALOX15	246	0.107867	1.07763	0.66055	0.987258	0	35.4119	38.1611	35.1399	35.686	39.862	36.5327	0
A_33_P3361348	ref|NM_001140|ens|ENST00000293761|gb|AK312557|gb|AB590843	hs|chr17:4539114-4539055	0	ALOX15	NM_001140	ref|Homo sapiens arachidonate 15-lipoxygenase (ALOX15), mRNA [NM_001140]	ALOX15	246	-0.064282	0.956421	0.801253	0.990458	0	52.5689	50.278	54.2886	50.9037	46.6844	54.1483	0
A_23_P60627	ref|NM_001141|ref|NM_001039130|ref|NM_001039131|ens|ENST00000380173	hs|chr17:7952182-7952241	0	ALOX15B	NM_001141	ref|Homo sapiens arachidonate 15-lipoxygenase, type B (ALOX15B), transcript variant d, mRNA [NM_001141]	ALOX15B	247	-1.55037	0.341422	0.32466	0.987258	0	346.385	118.263	98.7968	1214.44	118.067	118.46	1
A_23_P104464	ref|NM_000698|ens|ENST00000374391|gb|J03600|gb|J03571	hs|chr10:45941417-45941476	0	ALOX5	NM_000698	ref|Homo sapiens arachidonate 5-lipoxygenase (ALOX5), mRNA [NM_000698]	ALOX5	240	0.263752	1.2006	0.390375	0.987258	0	34.0505	40.881	34.7643	33.3514	47.2339	35.3825	0
A_23_P104464	ref|NM_000698|ens|ENST00000374391|gb|J03600|gb|J03571	hs|chr10:45941417-45941476	0	ALOX5	NM_000698	ref|Homo sapiens arachidonate 5-lipoxygenase (ALOX5), mRNA [NM_000698]	ALOX5	240	0.112016	1.08074	0.677198	0.987258	0	33.6023	36.3153	36.3151	31.0922	33.8357	38.9766	0
A_23_P104464	ref|NM_000698|ens|ENST00000374391|gb|J03600|gb|J03571	hs|chr10:45941417-45941476	0	ALOX5	NM_000698	ref|Homo sapiens arachidonate 5-lipoxygenase (ALOX5), mRNA [NM_000698]	ALOX5	240	0.082697	1.059	0.75537	0.9898	0	33.6583	35.644	36.7426	30.8329	33.9005	37.4771	0
A_23_P104464	ref|NM_000698|ens|ENST00000374391|gb|J03600|gb|J03571	hs|chr10:45941417-45941476	0	ALOX5	NM_000698	ref|Homo sapiens arachidonate 5-lipoxygenase (ALOX5), mRNA [NM_000698]	ALOX5	240	0.0349281	1.02451	0.888899	0.996443	0	35.0707	35.9302	35.686	34.4661	38.4294	33.5935	0
A_23_P104464	ref|NM_000698|ens|ENST00000374391|gb|J03600|gb|J03571	hs|chr10:45941417-45941476	0	ALOX5	NM_000698	ref|Homo sapiens arachidonate 5-lipoxygenase (ALOX5), mRNA [NM_000698]	ALOX5	240	0.0345061	1.02421	0.887227	0.996348	0	34.2693	35.0989	32.8309	35.7708	35.872	34.3424	0
A_23_P104464	ref|NM_000698|ens|ENST00000374391|gb|J03600|gb|J03571	hs|chr10:45941417-45941476	0	ALOX5	NM_000698	ref|Homo sapiens arachidonate 5-lipoxygenase (ALOX5), mRNA [NM_000698]	ALOX5	240	0.0174957	1.0122	0.961554	0.997354	0	40.2579	40.7491	40.1061	40.4103	51.7942	32.0593	0
A_23_P104464	ref|NM_000698|ens|ENST00000374391|gb|J03600|gb|J03571	hs|chr10:45941417-45941476	0	ALOX5	NM_000698	ref|Homo sapiens arachidonate 5-lipoxygenase (ALOX5), mRNA [NM_000698]	ALOX5	240	0.00735081	1.00511	0.97592	0.99866	0	34.08	34.254	33.2017	34.9814	32.8147	35.7565	0
A_23_P104464	ref|NM_000698|ens|ENST00000374391|gb|J03600|gb|J03571	hs|chr10:45941417-45941476	0	ALOX5	NM_000698	ref|Homo sapiens arachidonate 5-lipoxygenase (ALOX5), mRNA [NM_000698]	ALOX5	240	-0.0817053	0.94494	0.769551	0.989802	0	36.9134	34.881	34.7627	39.1972	38.9527	31.2349	0
A_33_P3356007	ens|ENST00000475300|gb|AB208946	hs|chr10:45936942-45937001	0	ENST00000475300	ENST00000475300	gb|Homo sapiens mRNA for arachidonate 5-lipoxygenase variant protein. [AB208946]	ALOX5	240	-0.0937023	0.937115	0.696644	0.987258	0	40.5661	38.0151	40.8246	40.3092	38.6813	37.3603	0
A_23_P104464	ref|NM_000698|ens|ENST00000374391|gb|J03600|gb|J03571	hs|chr10:45941417-45941476	0	ALOX5	NM_000698	ref|Homo sapiens arachidonate 5-lipoxygenase (ALOX5), mRNA [NM_000698]	ALOX5	240	-0.117462	0.921808	0.640449	0.987258	0	37.3399	34.4203	38.7659	35.9664	36.1931	32.7342	0
A_23_P104464	ref|NM_000698|ens|ENST00000374391|gb|J03600|gb|J03571	hs|chr10:45941417-45941476	0	ALOX5	NM_000698	ref|Homo sapiens arachidonate 5-lipoxygenase (ALOX5), mRNA [NM_000698]	ALOX5	240	-0.30371	0.810167	0.29549	0.987258	0	38.9231	31.5342	41.8171	36.2295	34.1176	29.1465	0
A_24_P347378	ref|NM_001629|ens|ENST00000380490|gb|AK314143|gb|AB590814	hs|chr13:31338155-31338214	0	ALOX5AP	NM_001629	ref|Homo sapiens arachidonate 5-lipoxygenase-activating protein (ALOX5AP), mRNA [NM_001629]	ALOX5AP	241	-0.693842	0.618205	0.32341	0.987258	0	112.605	69.6132	69.4829	182.49	56.1567	86.2942	1
A_24_P347880	ref|NM_021628|ref|NM_001165960|ens|ENST00000448843|ens|ENST00000318227	hs|chr17:8006732-8006673	0	ALOXE3	NM_021628	ref|Homo sapiens arachidonate lipoxygenase 3 (ALOXE3), transcript variant 2, mRNA [NM_021628]	ALOXE3	59344	-0.546192	0.684825	0.310063	0.987258	0	114.454	78.3808	78.2991	167.303	79.8967	76.8937	1
A_23_P337658	ref|NM_001631|ens|ENST00000457560|ens|ENST00000295463|gb|M31008	hs|chr2:233323933-233323992	0	ALPI	NM_001631	ref|Homo sapiens alkaline phosphatase, intestinal (ALPI), mRNA [NM_001631]	ALPI	248	0.00737276	1.00512	0.978675	0.999274	0	54.9352	55.2166	51.0361	59.1321	50.0003	60.9771	0
A_23_P144531	ens|ENST00000309610|gb|AK026323	hs|chr4:113336615-113336674	0	ENST00000309610	ENST00000309610	ens|alpha-kinase 1 [Source:HGNC Symbol;Acc:20917] [ENST00000309610]	ALPK1	80216	0.673488	1.59492	0.429926	0.987258	0	9932.02	15840.8	19546.3	5046.73	15332.5	16366	1
A_23_P133133	ref|NM_025144|ref|NM_001102406|ens|ENST00000505127|ens|ENST00000177648	hs|chr4:113362743-113362802	0	ALPK1	NM_025144	ref|Homo sapiens alpha-kinase 1 (ALPK1), transcript variant 1, mRNA [NM_025144]	ALPK1	80216	0.250738	1.18982	0.744611	0.9898	0	309.088	367.758	520.975	183.378	525.823	257.208	1
A_23_P15876	ref|NM_052947|ens|ENST00000361673|gb|AY044450|gb|BX647639	hs|chr18:56148827-56148768	0	ALPK2	NM_052947	ref|Homo sapiens alpha-kinase 2 (ALPK2), mRNA [NM_052947]	ALPK2	115701	-0.146031	0.903733	0.775836	0.989802	0	1399.15	1264.46	2018.52	969.828	1095.67	1459.25	1
A_33_P3210099	ref|NM_020778|ens|ENST00000258888|gb|BC067284|gb|AK026851	hs|chr15:85416651-85416710	0	ALPK3	NM_020778	ref|Homo sapiens alpha-kinase 3 (ALPK3), mRNA [NM_020778]	ALPK3	57538	0.110182	1.07936	0.758402	0.989802	0	70.0594	75.6196	85.8839	57.1506	67.745	84.4096	0
A_24_P353619	ref|NM_000478|ref|NM_001127501|ref|NM_001177520|ens|ENST00000374830	hs|chr1:21903084-21903884	0	ALPL	NM_000478	ref|Homo sapiens alkaline phosphatase, liver/bone/kidney (ALPL), transcript variant 1, mRNA [NM_000478]	ALPL	249	-0.170136	0.888759	0.899367	0.996521	0	151.105	134.296	114.229	199.885	43.8778	411.036	1
A_23_P79587	ref|NM_001632|ens|ENST00000485563|ens|ENST00000392027|gb|CR599162	hs|chr2:233247198-233247257	0	ALPP	NM_001632	ref|Homo sapiens alkaline phosphatase, placental (ALPP), mRNA [NM_001632]	ALPP	250	-0.517805	0.698434	0.412647	0.987258	0	258.334	180.429	159.901	417.362	175.751	185.232	1
A_24_P131580	ref|NM_031313|ens|ENST00000295453|gb|X55958|gb|BC014139	hs|chr2:233275347-233275406	0	ALPPL2	NM_031313	ref|Homo sapiens alkaline phosphatase, placental-like 2 (ALPPL2), mRNA [NM_031313]	ALPPL2	251	-0.647033	0.638592	0.456695	0.987258	0	1039.94	664.098	518.844	2084.4	682.691	646.012	1
A_23_P209430	ref|NM_020919|ens|ENST00000264276|gb|AB053305|gb|AF391100	hs|chr2:202566045-202565986	0	ALS2	NM_020919	ref|Homo sapiens amyotrophic lateral sclerosis 2 (juvenile) (ALS2), transcript variant 1, mRNA [NM_020919]	ALS2	57679	1.14186	2.20666	0.238539	0.987258	0	77.1077	170.15	158.228	37.5762	152.023	190.439	1
A_23_P377664	ref|NM_001135745|ens|ENST00000467448|gb|AK023024|gb|AB053306	hs|chr2:202624550-202624491	0	ALS2	NM_001135745	ref|Homo sapiens amyotrophic lateral sclerosis 2 (juvenile) (ALS2), transcript variant 2, mRNA [NM_001135745]	ALS2	57679	0.489474	1.40393	0.324169	0.987258	0	348.904	489.838	453.59	268.379	392.276	611.664	1
A_33_P3415345	ref|NM_001135745|ens|ENST00000496244|ens|ENST00000409666|ens|ENST00000467448	hs|chr2:202626185-202626126	0	ALS2	NM_001135745	ref|Homo sapiens amyotrophic lateral sclerosis 2 (juvenile) (ALS2), transcript variant 2, mRNA [NM_001135745]	ALS2	57679	0.0492021	1.03469	0.872818	0.995043	0	144.698	149.718	166.395	125.831	135.849	165.004	1
A_32_P420009	ref|NM_147129|ref|NM_001190707|ref|NM_182775|ref|NR_033815	hs|chr3:46711650-46711591	0	ALS2CL	NM_147129	ref|Homo sapiens ALS2 C-terminal like (ALS2CL), transcript variant 1, mRNA [NM_147129]	ALS2CL	259173	0.156799	1.11481	0.531686	0.987258	0	125.975	140.439	122.912	129.115	146.528	134.602	1
A_23_P328642	ref|NM_152525|ref|NM_001168221|ref|NM_001168216|ens|ENST00000439802	hs|chr2:202352500-202352441	0	ALS2CR11	NM_152525	ref|Homo sapiens amyotrophic lateral sclerosis 2 (juvenile) chromosome region, candidate 11 (ALS2CR11), transcript variant 2, mRNA [NM_152525]	ALS2CR11	151254	0.910826	1.88012	0.219663	0.987258	0	51.7637	97.3222	59.6479	44.9217	163.087	58.077	1
A_23_P349343	ref|NM_139163|ref|NM_001127391|ens|ENST00000494223|ens|ENST00000494171	hs|chr2:202154439-202154251	0	ALS2CR12	NM_139163	ref|Homo sapiens amyotrophic lateral sclerosis 2 (juvenile) chromosome region, candidate 12 (ALS2CR12), transcript variant 1, mRNA [NM_139163]	ALS2CR12	130540	0.13537	1.09837	0.641686	0.987258	0	42.5326	46.7167	48.932	36.9701	46.8278	46.6058	0
A_33_P3323218	ref|NM_024744|ref|NM_001104586|ens|ENST00000320443|ens|ENST00000428114	hs|chr2:203850935-203850994	0	ALS2CR8	NM_024744	ref|Homo sapiens amyotrophic lateral sclerosis 2 (juvenile) chromosome region, candidate 8 (ALS2CR8), mRNA [NM_024744]	ALS2CR8	79800	0.811974	1.75561	0.418988	0.987258	0	76.797	134.826	158.586	37.1898	191.817	94.7676	1
A_23_P83798	ref|NM_006982|ens|ENST00000316824|gb|BC010923|gb|U31986	hs|chr12:85677449-85677508	0	ALX1	NM_006982	ref|Homo sapiens ALX homeobox 1 (ALX1), mRNA [NM_006982]	ALX1	8092	-0.00879804	0.99392	0.97053	0.99841	0	37.1993	36.9731	37.9907	36.4243	37.3603	36.5899	0
A_23_P85941	ref|NM_006492|ens|ENST00000369792|gb|BC112007|gb|BC113428	hs|chr1:110603170-110603111	0	ALX3	NM_006492	ref|Homo sapiens ALX homeobox 3 (ALX3), mRNA [NM_006492]	ALX3	257	-0.628526	0.646837	0.396864	0.987258	0	99.465	64.3376	55.9394	176.857	64.2612	64.4142	1
A_33_P3273073	ref|NM_021926|ens|ENST00000329255|gb|BC166622|gb|AJ404888	hs|chr11:44289128-44289069	0	ALX4	NM_021926	ref|Homo sapiens ALX homeobox 4 (ALX4), mRNA [NM_021926]	ALX4	60529	-0.447923	0.733098	0.413453	0.987258	0	73.6466	53.9902	49.2874	110.045	51.9446	56.1163	1
A_33_P3259736	ref|NM_014324|ref|NM_203382|ref|NM_001167595|ens|ENST00000382079	hs|chr5:33988020-33987961	0	AMACR	NM_014324	ref|Homo sapiens alpha-methylacyl-CoA racemase (AMACR), nuclear gene encoding mitochondrial protein, transcript variant 1, mRNA [NM_014324]	AMACR	23600	0.396796	1.31658	0.554615	0.987258	0	63.0404	82.9978	105.384	37.7106	72.5539	94.9451	1
A_23_P44867	ref|NM_016519|ens|ENST00000449493|ens|ENST00000322937|gb|AJ537437	hs|chr4:71472470-71472529	0	AMBN	NM_016519	ref|Homo sapiens ameloblastin (enamel matrix protein) (AMBN), mRNA [NM_016519]	AMBN	258	-0.102725	0.931272	0.743742	0.9898	0	59.0704	55.0106	51.3669	67.9291	49.3599	61.3083	0
A_23_P256504	ref|NM_001633|ens|ENST00000265132|gb|AK290837|gb|AB463406	hs|chr9:116823757-116823373	0	AMBP	NM_001633	ref|Homo sapiens alpha-1-microglobulin/bikunin precursor (AMBP), mRNA [NM_001633]	AMBP	259	0.0039718	1.00276	0.9889	0.999483	0	38.5213	38.6275	44.2747	33.5156	38.8118	38.4441	0
A_33_P3293169	ref|NM_017749|ens|ENST00000314823|ens|ENST00000298834|ens|ENST00000426438	hs|chr11:46563555-46563496	0	AMBRA1	NM_017749	ref|Homo sapiens autophagy/beclin-1 regulator 1 (AMBRA1), mRNA [NM_017749]	AMBRA1	55626	0.275794	1.21066	0.477063	0.987258	0	55.4587	67.1417	70.7551	43.4692	71.4105	63.1281	0
A_23_P353742	ref|NM_017749|ens|ENST00000314823|ens|ENST00000458649|ens|ENST00000426438	hs|chr11:46418157-46418098	0	AMBRA1	NM_017749	ref|Homo sapiens autophagy/beclin-1 regulator 1 (AMBRA1), mRNA [NM_017749]	AMBRA1	55626	-0.0695926	0.952907	0.906226	0.996521	0	1547.05	1474.19	2416.54	990.403	1716.84	1265.84	1
A_24_P371962	ref|NM_001634|ref|NM_001033059|ens|ENST00000412644|ens|ENST00000450889	hs|chr6:111216818-111216877	0	AMD1	NM_001634	ref|Homo sapiens adenosylmethionine decarboxylase 1 (AMD1), transcript variant 1, mRNA [NM_001634]	AMD1	262	1.0658	2.09333	0.280762	0.987258	0	2706.61	5665.83	5518.96	1327.37	4372.58	7341.57	1
A_33_P3395369	ref|NM_001634|ref|NM_001033059|ens|ENST00000368877|ens|ENST00000412644	hs|chr6:111213970-111214029	0	AMD1	NM_001634	ref|Homo sapiens adenosylmethionine decarboxylase 1 (AMD1), transcript variant 1, mRNA [NM_001634]	AMD1	262	0.64517	1.56392	0.313355	0.987258	0	942.039	1473.28	1333.42	665.538	1070.72	2027.19	1
A_32_P122226	ref|NM_152435|ens|ENST00000266736|gb|AK054617|gb|AK122802	hs|chr12:96362134-96362193	0	AMDHD1	NM_152435	ref|Homo sapiens amidohydrolase domain containing 1 (AMDHD1), mRNA [NM_152435]	AMDHD1	144193	0.177859	1.1312	0.658562	0.987258	0	46.1482	52.203	51.4647	41.3809	40.4535	67.365	0
A_33_P3491294	ref|NM_015944|ens|ENST00000293971|ens|ENST00000429721|gb|AF132948	hs|chr16:2579619-2579677	0	AMDHD2	NM_015944	ref|Homo sapiens amidohydrolase domain containing 2 (AMDHD2), transcript variant 1, mRNA [NM_015944]	AMDHD2	51005	-1.04662	0.4841	0.0466392	0.987258	0	1514.85	733.337	1193.19	1923.21	805.405	667.717	1
A_23_P96478	ref|NM_182681|ref|NM_001142|ref|NM_182680|ens|ENST00000348912	hs|chrX:11311573-11312940	0	AMELX	NM_182681	ref|Homo sapiens amelogenin, X-linked (AMELX), transcript variant 2, mRNA [NM_182681]	AMELX	265	0.0798362	1.0569	0.748749	0.9898	0	43.127	45.5808	40.643	45.7628	44.6605	46.5201	0
A_24_P182254	ref|NM_001143|ens|ENST00000383037|ens|ENST00000383036|ens|ENST00000215479	hs|chrY:6736806-6736478	0	AMELY	NM_001143	ref|Homo sapiens amelogenin, Y-linked (AMELY), mRNA [NM_001143]	AMELY	266	0.0403608	1.02837	0.865299	0.994566	0	37.6081	38.6751	36.9724	38.2547	38.7064	38.6438	0
A_23_P141005	ref|NM_001144|ens|ENST00000492830|ens|ENST00000290649|gb|AK023874	hs|chr16:56395757-56395698	0	AMFR	NM_001144	ref|Homo sapiens autocrine motility factor receptor (AMFR), mRNA [NM_001144]	AMFR	267	0.206103	1.15357	0.831787	0.992005	0	737.352	850.585	1514.8	358.918	1252.34	577.713	1
A_24_P135444	ref|NM_001144|ens|ENST00000314566|ens|ENST00000492830|ens|ENST00000290649	hs|chr16:56396402-56396343	0	AMFR	NM_001144	ref|Homo sapiens autocrine motility factor receptor (AMFR), mRNA [NM_001144]	AMFR	267	-0.143449	0.905352	0.764127	0.989802	0	2225.18	2014.57	2755.97	1796.62	1510.36	2687.11	1
A_23_P78944	ref|NM_000479|ens|ENST00000221496|gb|AB590863|gb|BC033218	hs|chr19:2251742-2251801	0	AMH	NM_000479	ref|Homo sapiens anti-Mullerian hormone (AMH), mRNA [NM_000479]	AMH	268	-0.36786	0.774931	0.323355	0.987258	0	102.056	79.0864	82.4163	126.376	82.8856	75.4613	1
A_24_P115990	ref|NM_020547|ref|NM_001164691|ref|NM_001164690|ens|ENST00000379791	hs|chr12:53822794-53823295	0	AMHR2	NM_020547	ref|Homo sapiens anti-Mullerian hormone receptor, type II (AMHR2), transcript variant 1, mRNA [NM_020547]	AMHR2	269	-0.756234	0.59204	0.0315158	0.987258	0	61.1982	36.2318	62.2225	60.1908	36.4301	36.0346	0
A_24_P192914	ref|NM_153206|ref|NM_001098526|ens|ENST00000292067|ens|ENST00000356289	hs|chr11:118064748-118064689	0	AMICA1	NM_153206	ref|Homo sapiens adhesion molecule, interacts with CXADR antigen 1 (AMICA1), transcript variant 2, mRNA [NM_153206]	AMICA1	120425	0.0381358	1.02679	0.875563	0.995242	0	38.5595	39.5924	37.8528	39.2794	41.4113	37.8533	0
A_33_P3277973	gb|AK057590	hs|chr11:118069044-118068985	0	AMICA1	AK057590	gb|Homo sapiens cDNA FLJ33028 fis, clone THYMU2000140. [AK057590]	AMICA1	120425	-0.202065	0.869305	0.455879	0.987258	0	39.3354	34.1945	37.9769	40.7426	37.2654	31.3766	0
A_33_P3369461	ref|NM_020703|ens|ENST00000369862|gb|BC040879	hs|chr1:110049749-110049690	0	AMIGO1	NM_020703	ref|Homo sapiens adhesion molecule with Ig-like domain 1 (AMIGO1), mRNA [NM_020703]	AMIGO1	57463	-0.457836	0.728077	0.374286	0.987258	0	310.566	226.116	439.251	219.581	199.583	256.177	1
A_23_P14083	ref|NM_181847|ref|NM_001143668|ens|ENST00000429635|ens|ENST00000266581	hs|chr12:47470990-47470931	0	AMIGO2	NM_181847	ref|Homo sapiens adhesion molecule with Ig-like domain 2 (AMIGO2), transcript variant 2, mRNA [NM_181847]	AMIGO2	347902	0.435261	1.35216	0.600924	0.987258	0	7043.68	9524.15	12628.3	3928.75	13486.4	6725.98	1
A_33_P3295538	ref|NM_198722|ens|ENST00000480687|ens|ENST00000320431|gb|AY358134	hs|chr3:49755052-49754993	0	AMIGO3	NM_198722	ref|Homo sapiens adhesion molecule with Ig-like domain 3 (AMIGO3), mRNA [NM_198722]	AMIGO3	386724	0.0712983	1.05066	0.82473	0.991737	0	50.3496	52.9003	60.2012	42.1101	49.7795	56.2168	0
A_23_P306655	ref|NM_198722|ens|ENST00000480687|ens|ENST00000320431|gb|AB058754	hs|chr3:49754603-49754544	0	AMIGO3	NM_198722	ref|Homo sapiens adhesion molecule with Ig-like domain 3 (AMIGO3), mRNA [NM_198722]	AMIGO3	386724	-0.192255	0.875237	0.46904	0.987258	0	248.613	217.595	235.19	262.802	204.661	231.347	1
A_32_P201773	ref|NM_015365|ref|NM_001171689|ref|NM_001025580|ens|ENST00000262844	hs|chrX:109437714-109437655	0	AMMECR1	NM_015365	ref|Homo sapiens Alport syndrome, mental retardation, midface hypoplasia and elliptocytosis chromosomal region gene 1 (AMMECR1), transcript variant 1, mRNA [NM_015365]	AMMECR1	9949	1.32333	2.50244	0.149458	0.987258	0	477.209	1194.18	883.636	257.717	1443.61	987.858	1
A_33_P3234347	ref|NM_001171689|ref|NM_015365|ref|NM_001025580|ens|ENST00000372057	hs|chrX:109440277-109440218	0	AMMECR1	NM_001171689	ref|Homo sapiens Alport syndrome, mental retardation, midface hypoplasia and elliptocytosis chromosomal region gene 1 (AMMECR1), transcript variant 3, mRNA [NM_001171689]	AMMECR1	9949	0.909603	1.87853	0.0499088	0.987258	0	567.57	1066.2	694.789	463.646	1121.11	1013.97	1
A_23_P40039	ref|NM_031445|ref|NM_001199140|ens|ENST00000393001|ens|ENST00000272647	hs|chr2:128619399-128619340	0	AMMECR1L	NM_031445	ref|Homo sapiens AMME chromosomal region gene 1-like (AMMECR1L), transcript variant 1, mRNA [NM_031445]	AMMECR1L	83607	0.833753	1.78232	0.346735	0.987258	0	2488.88	4435.97	4886.94	1267.57	3832.73	5134.17	1
A_23_P48455	ref|NM_030943|ens|ENST00000299155|gb|AF328788|gb|AK055802	hs|chr14:103397053-103397112	0	AMN	NM_030943	ref|Homo sapiens amnionless homolog (mouse) (AMN), mRNA [NM_030943]	AMN	81693	-1.14328	0.452729	0.432385	0.987258	0	1756.18	795.073	534.177	5773.67	850.363	743.378	1
A_24_P100830	ref|NM_001113402|ref|NR_004854|ens|ENST00000281471|gb|CR618732	hs|chr12:31824730-31824671	0	AMN1	NM_001113402	ref|Homo sapiens antagonist of mitotic exit network 1 homolog (S. cerevisiae) (AMN1), transcript variant 1, mRNA [NM_001113402]	AMN1	196394	0.309364	1.23916	0.588852	0.987258	0	91.7889	113.741	134.166	62.7971	142.659	90.6852	1
A_24_P344961	ref|NM_133265|ref|NM_001113490|ens|ENST00000371959|ens|ENST00000304758	hs|chrX:112018573-112018514	0	AMOT	NM_133265	ref|Homo sapiens angiomotin (AMOT), transcript variant 2, mRNA [NM_133265]	AMOT	154796	0.852329	1.80541	0.197734	0.987258	0	88.0338	158.937	139.153	55.6938	150.366	167.997	1
A_33_P3347397	ref|NM_001113490|ref|NM_133265|ens|ENST00000371962|ens|ENST00000371959	hs|chrX:112021799-112021740	0	AMOT	NM_001113490	ref|Homo sapiens angiomotin (AMOT), transcript variant 1, mRNA [NM_001113490]	AMOT	154796	0.186457	1.13797	0.480596	0.987258	0	40.4646	46.0473	43.7039	37.4654	47.2588	44.867	0
A_24_P401768	ref|NM_130847|ens|ENST00000299004|ens|ENST00000433060|ens|ENST00000317829	hs|chr11:94554977-94563264	0	AMOTL1	NM_130847	ref|Homo sapiens angiomotin like 1 (AMOTL1), mRNA [NM_130847]	AMOTL1	154810	0.851828	1.80479	0.38032	0.987258	0	247.759	447.152	533.597	115.039	420.023	476.033	1
A_33_P3271196	ref|NM_130847|ens|ENST00000317829|ens|ENST00000433060|ens|ENST00000317837	hs|chr11:94609844-94609903	0	AMOTL1	NM_130847	ref|Homo sapiens angiomotin like 1 (AMOTL1), mRNA [NM_130847]	AMOTL1	154810	-1.08335	0.471933	0.320366	0.987258	0	1883.03	888.663	801.33	4424.9	911.72	866.189	1
A_23_P166686	ref|NM_016201|ens|ENST00000422605|ens|ENST00000249883|gb|AF175966	hs|chr3:134074801-134074742	0	AMOTL2	NM_016201	ref|Homo sapiens angiomotin like 2 (AMOTL2), mRNA [NM_016201]	AMOTL2	51421	0.45028	1.36631	0.608241	0.987258	0	11017.1	15052.7	22661.6	5356.07	14773.1	15337.7	1
A_33_P3248152	ref|NM_000036|ref|NM_001172626|ens|ENST00000485564|ens|ENST00000520113	hs|chr1:115226880-115226821	0	AMPD1	NM_000036	ref|Homo sapiens adenosine monophosphate deaminase 1 (AMPD1), transcript variant 1, mRNA [NM_000036]	AMPD1	270	0.884144	1.84567	0.304283	0.987258	0	34.702	64.0484	36.3913	33.0911	123.562	33.1995	1
A_23_P51787	ref|NM_000036|ref|NM_001172626|ens|ENST00000520113|ens|ENST00000353928	hs|chr1:115216274-115215849	0	AMPD1	NM_000036	ref|Homo sapiens adenosine monophosphate deaminase 1 (AMPD1), transcript variant 1, mRNA [NM_000036]	AMPD1	270	-0.201689	0.869532	0.433933	0.987258	0	36.1248	31.4117	34.3134	38.0319	32.2526	30.5927	0
A_23_P201596	ref|NM_004037|ref|NM_139156|ref|NM_203404|ens|ENST00000393689	hs|chr1:110173915-110173974	0	AMPD2	NM_004037	ref|Homo sapiens adenosine monophosphate deaminase 2 (AMPD2), transcript variant 1, mRNA [NM_004037]	AMPD2	271	-0.00846472	0.99415	0.976439	0.99881	0	1950.62	1939.21	2197.27	1731.65	2091.28	1798.2	1
A_24_P304154	ref|NM_001025390|ref|NM_000480|ref|NM_001025389|ref|NM_001172430	hs|chr11:10528563-10528622	0	AMPD3	NM_001025390	ref|Homo sapiens adenosine monophosphate deaminase 3 (AMPD3), transcript variant 3, mRNA [NM_001025390]	AMPD3	272	0.0878794	1.06281	0.905455	0.996521	0	1139.21	1210.76	2091.28	620.581	1140.06	1285.85	1
A_23_P31273	ref|NM_001635|ref|NM_139316|ens|ENST00000353242|ens|ENST00000421537	hs|chr7:38423860-38423801	0	AMPH	NM_001635	ref|Homo sapiens amphiphysin (AMPH), transcript variant 1, mRNA [NM_001635]	AMPH	273	1.60826	3.04884	0.241729	0.987258	0	170.509	519.855	60.4814	480.699	429.039	629.895	1
A_23_P257164	ref|NM_000481|ref|NM_001164712|ref|NM_001164710|ref|NM_001164711	hs|chr3:49454494-49454435	0	AMT	NM_000481	ref|Homo sapiens aminomethyltransferase (AMT), nuclear gene encoding mitochondrial protein, transcript variant 1, mRNA [NM_000481]	AMT	275	0.450009	1.36605	0.349048	0.987258	0	209.777	286.566	253.109	173.864	376.919	217.872	1
A_24_P174503	ref|NM_000481|ref|NM_001164712|ref|NM_001164710|ref|NM_001164711	hs|chr3:49455118-49455059	0	AMT	NM_000481	ref|Homo sapiens aminomethyltransferase (AMT), nuclear gene encoding mitochondrial protein, transcript variant 1, mRNA [NM_000481]	AMT	275	0.449517	1.36558	0.34624	0.987258	0	78.1058	106.66	101.623	60.0309	129.862	87.603	1
A_33_P3212860	ref|NM_212557|ens|ENST00000339336|gb|AY358528	hs|chr4:71398396-71398455	0	AMTN	NM_212557	ref|Homo sapiens amelotin (AMTN), mRNA [NM_212557]	AMTN	401138	-0.139283	0.90797	0.609839	0.987258	0	48.7137	44.2306	54.1095	43.8559	42.997	45.4995	0
A_23_P23611	ref|NM_001008219|ref|NM_001008218|ref|NM_004038|ref|NM_001008221	hs|chr1:104207021-104207080	0	AMY1C	NM_001008219	ref|Homo sapiens amylase, alpha 1C (salivary) (AMY1C), mRNA [NM_001008219]	AMY1C	278	0.444637	1.36097	0.616774	0.987258	0	102.737	139.822	200.445	52.6572	188.069	103.952	1
A_33_P3365193	ref|NM_001008219|ref|NM_001008218|ref|NM_004038|ref|NM_001008221	hs|chr1:104203004-104203063	0	AMY1C	NM_001008219	ref|Homo sapiens amylase, alpha 1C (salivary) (AMY1C), mRNA [NM_001008219]	AMY1C	278	0.39588	1.31575	0.567677	0.987258	0	78.9933	103.935	126.176	49.4542	139.071	77.676	1
A_33_P3268783	ref|NM_133463|ens|ENST00000312371|gb|AB075830|gb|BC146753	hs|chr7:2755002-2755061	0	AMZ1	NM_133463	ref|Homo sapiens archaelysin family metallopeptidase 1 (AMZ1), mRNA [NM_133463]	AMZ1	155185	1.18545	2.27434	0.0609419	0.987258	0	56.5577	128.631	80.6124	39.6809	123.692	133.767	1
A_33_P3380837	ref|NM_133463|ens|ENST00000407112|ens|ENST00000312371|gb|AK289723	hs|chr7:2752675-2752734	0	AMZ1	NM_133463	ref|Homo sapiens archaelysin family metallopeptidase 1 (AMZ1), mRNA [NM_133463]	AMZ1	155185	0.697541	1.62174	0.215189	0.987258	0	1720.03	2789.44	2518.38	1174.77	2727.55	2852.73	1
A_33_P3223472	ref|NM_016627|ref|NM_001033574|ref|NM_001033569|ref|NM_001033570	hs|chr17:66251957-66252016	0	AMZ2	NM_016627	ref|Homo sapiens archaelysin family metallopeptidase 2 (AMZ2), transcript variant 1, mRNA [NM_016627]	AMZ2	51321	0.105908	1.07617	0.753143	0.9898	0	6292.25	6771.54	5987.96	6611.99	8268.26	5545.75	1
A_23_P15564	ref|NM_016627|ref|NM_001033574|ref|NM_001033569|ref|NM_001033570	hs|chr17:66253042-66253101	0	AMZ2	NM_016627	ref|Homo sapiens archaelysin family metallopeptidase 2 (AMZ2), transcript variant 1, mRNA [NM_016627]	AMZ2	51321	-0.00591397	0.995909	0.987211	0.999467	0	8482.32	8447.62	8212.14	8761.39	10789.1	6614.32	1
A_23_P329254	ref|NR_026903|ens|ENST00000430983|gb|AK056627	hs|chr17:62963007-62962948	0	AMZ2P1	NR_026903	ref|Homo sapiens archaelysin family metallopeptidase 2 pseudogene 1 (AMZ2P1), non-coding RNA [NR_026903]	AMZ2P1	201283	-0.112477	0.924998	0.641835	0.987258	0	35.0702	32.4399	34.4351	35.717	32.7669	32.1161	0
A_24_P410587	ref|NR_026903|ens|ENST00000397713|ens|ENST00000430983|gb|BC073870	hs|chr17:62964429-62964370	0	AMZ2P1	NR_026903	ref|Homo sapiens archaelysin family metallopeptidase 2 pseudogene 1 (AMZ2P1), non-coding RNA [NR_026903]	AMZ2P1	201283	-0.121745	0.919076	0.742244	0.9898	0	6325.05	5813.2	6163.05	6491.31	7414.53	4557.71	1
A_33_P3262138	ref|NM_022662|ref|XM_003118861|gb|AB385205|gb|BC104902	hs|chr2:112540019-112539960	0	ANAPC1	NM_022662	ref|Homo sapiens anaphase promoting complex subunit 1 (ANAPC1), mRNA [NM_022662]	ANAPC1	64682	1.00752	2.01045	0.233228	0.987258	0	84.2085	169.297	156.658	45.2646	157.588	181.875	1
A_23_P17204	ref|NM_022662|ens|ENST00000462785|ref|XM_003118861|gb|AJ278357	hs|chr2:112526856-112526797	0	ANAPC1	NM_022662	ref|Homo sapiens anaphase promoting complex subunit 1 (ANAPC1), mRNA [NM_022662]	ANAPC1	64682	0.656639	1.57641	0.0951175	0.987258	0	1036.61	1634.13	1072.9	1001.56	1371.01	1947.74	1
A_33_P3363655	ref|NM_022662|ens|ENST00000451367|ens|ENST00000489177|ens|ENST00000431964	hs|chr2:112636447-112636388	0	ANAPC1	NM_022662	ref|Homo sapiens anaphase promoting complex subunit 1 (ANAPC1), mRNA [NM_022662]	ANAPC1	64682	0.569566	1.48408	0.280675	0.987258	0	67.2146	99.7517	96.394	46.8681	93.8791	105.992	1
A_32_P12104	ref|NM_022662|ens|ENST00000469523|ens|ENST00000341068|ref|XM_003118861	hs|chr2:112582737-112582584	0	ANAPC1	NM_022662	ref|Homo sapiens anaphase promoting complex subunit 1 (ANAPC1), mRNA [NM_022662]	ANAPC1	64682	0.207123	1.15438	0.450355	0.987258	0	68.3906	78.9489	73.1707	63.9227	73.432	84.8804	0
A_24_P186346	ref|NM_022662|ref|NR_026846|ens|ENST00000485325|ens|ENST00000341068	hs|chr2:112561345-112561286	0	ANAPC1	NM_022662	ref|Homo sapiens anaphase promoting complex subunit 1 (ANAPC1), mRNA [NM_022662]	ANAPC1	64682	-0.0968325	0.935084	0.854037	0.994012	0	768.576	718.683	510.825	1156.38	714.94	722.446	1
A_23_P250994	ref|NM_014885|ens|ENST00000513054|ens|ENST00000514390|ens|ENST00000511466	hs|chr4:145916726-145916667	0	ANAPC10	NM_014885	ref|Homo sapiens anaphase promoting complex subunit 10 (ANAPC10), mRNA [NM_014885]	ANAPC10	10393	-0.52786	0.693583	0.164621	0.987258	0	1844.2	1279.1	1577.61	2155.83	1436.4	1139.03	1
A_23_P27147	ref|NM_001002244|ref|NM_001002249|ref|NM_016476|ref|NM_001002248	hs|chr17:79858019-79858078	0	ANAPC11	NM_001002244	ref|Homo sapiens anaphase promoting complex subunit 11 (ANAPC11), transcript variant 1, mRNA [NM_001002244]	ANAPC11	51529	0.0245568	1.01717	0.931072	0.99697	0	80087.5	81462.3	69974	91662.7	79809.4	83149.6	1
A_32_P16854	ref|NM_015391|ref|NR_024400|ref|NR_024401|ens|ENST00000508755	hs|chr3:134201667-134197518	0	ANAPC13	NM_015391	ref|Homo sapiens anaphase promoting complex subunit 13 (ANAPC13), transcript variant 1, mRNA [NM_015391]	ANAPC13	25847	-0.165625	0.891543	0.517664	0.987258	0	3338.34	2976.27	3463.39	3217.81	3137.29	2823.52	1
A_33_P3216955	ref|NM_173473	hs|chr10:73995557-73995616	0	ANAPC16	NM_173473	ref|Homo sapiens anaphase promoting complex subunit 16 (ANAPC16), mRNA [NM_173473]	ANAPC16	119504	1.03093	2.04334	0.314803	0.987258	0	140.207	286.49	311.84	63.0384	290.03	282.992	1
A_23_P253068	ref|NM_013366|ens|ENST00000483432|ens|ENST00000455910|ens|ENST00000323927	hs|chr9:140074667-140070265	0	ANAPC2	NM_013366	ref|Homo sapiens anaphase promoting complex subunit 2 (ANAPC2), mRNA [NM_013366]	ANAPC2	29882	0.337351	1.26343	0.482488	0.987258	0	135.384	171.049	191.131	95.8967	165.928	176.327	1
A_23_P317800	ref|NM_013367|ens|ENST00000510092|ens|ENST00000506973|ens|ENST00000504256	hs|chr4:25419940-25419999	0	ANAPC4	NM_013367	ref|Homo sapiens anaphase promoting complex subunit 4 (ANAPC4), mRNA [NM_013367]	ANAPC4	29945	0.0793703	1.05656	0.82499	0.991737	0	1920.43	2029.05	2421.63	1522.97	1970.48	2089.35	1
A_23_P204448	ref|NM_016237|ref|NM_001137559|ens|ENST00000344395|ens|ENST00000261819	hs|chr12:121746267-121746208	0	ANAPC5	NM_016237	ref|Homo sapiens anaphase promoting complex subunit 5 (ANAPC5), transcript variant 1, mRNA [NM_016237]	ANAPC5	51433	0.215351	1.16099	0.398575	0.987258	0	16588.3	19258.7	16216	16969.1	19931.7	18608.5	1
A_23_P44643	ref|NM_016238|ref|NM_001137664|ens|ENST00000486321|ens|ENST00000450008	hs|chr12:110815226-110813991	0	ANAPC7	NM_016238	ref|Homo sapiens anaphase promoting complex subunit 7 (ANAPC7), transcript variant 1, mRNA [NM_016238]	ANAPC7	51434	0.0590603	1.04179	0.842368	0.992672	0	521.568	543.363	582.912	466.679	487.618	605.48	1
A_33_P3236177	ref|NM_001145|ref|NM_001097577|ens|ENST00000336811|ens|ENST00000397987	hs|chr14:21162109-21162168	0	ANG	NM_001145	ref|Homo sapiens angiogenin, ribonuclease, RNase A family, 5 (ANG), transcript variant 1, mRNA [NM_001145]	ANG	283	-0.24353	0.844676	0.831062	0.992005	0	1144.25	966.524	433.935	3017.31	941.916	991.775	1
A_23_P363406	ref|NM_015305|ens|ENST00000251089|gb|AB018302|gb|BC028714	hs|chr14:77253935-77253876	0	ANGEL1	NM_015305	ref|Homo sapiens angel homolog 1 (Drosophila) (ANGEL1), mRNA [NM_015305]	ANGEL1	23357	0.68864	1.61176	0.361886	0.987258	0	142.985	230.458	255.614	79.9827	225.602	235.418	1
A_24_P28619	ref|NM_144567|ens|ENST00000366962|ens|ENST00000360506	hs|chr1:213165809-213165750	0	ANGEL2	NM_144567	ref|Homo sapiens angel homolog 2 (Drosophila) (ANGEL2), mRNA [NM_144567]	ANGEL2	90806	0.61855	1.53533	0.446415	0.987258	0	567.101	870.687	1062.3	302.743	1008.76	751.51	1
A_23_P343237	ref|NM_144567|ens|ENST00000481918|ens|ENST00000310246|ens|ENST00000476904	hs|chr1:213181760-213181701	0	ANGEL2	NM_144567	ref|Homo sapiens angel homolog 2 (Drosophila) (ANGEL2), mRNA [NM_144567]	ANGEL2	90806	0.365064	1.28794	0.514312	0.987258	0	109.43	140.939	162.933	73.4962	163.431	121.543	1
A_23_P216023	ref|NM_001146|ref|NM_001199859|ens|ENST00000395820|ens|ENST00000517746	hs|chr8:108262371-108262312	0	ANGPT1	NM_001146	ref|Homo sapiens angiopoietin 1 (ANGPT1), transcript variant 1, mRNA [NM_001146]	ANGPT1	284	1.97693	3.93655	0.0730766	0.987258	0	1060.49	4174.66	1522.78	738.538	7672.24	2271.54	1
A_23_P60079	ref|NM_001147|ref|NM_001118887|ref|NM_001118888|ens|ENST00000415216	hs|chr8:6360349-6360290	0	ANGPT2	NM_001147	ref|Homo sapiens angiopoietin 2 (ANGPT2), transcript variant 1, mRNA [NM_001147]	ANGPT2	285	0.101286	1.07273	0.68359	0.987258	0	35.1577	37.7146	35.6763	34.6466	39.8337	35.7083	0
A_23_P68511	ref|NM_015985|ens|ENST00000381922|gb|AF113708|gb|AB527108	hs|chr20:853722-853663	0	ANGPT4	NM_015985	ref|Homo sapiens angiopoietin 4 (ANGPT4), mRNA [NM_015985]	ANGPT4	51378	-1.17125	0.444036	0.399883	0.987258	0	218.993	97.2408	70.9255	676.173	102.752	92.0251	1
A_24_P199484	ref|NM_004673|gb|AF086266	hs|chr1:178818745-178818686	0	ANGPTL1	NM_004673	ref|Homo sapiens angiopoietin-like 1 (ANGPTL1), mRNA [NM_004673]	ANGPTL1	9068	-0.455557	0.729229	0.513029	0.987258	0	54.0008	39.379	93.1215	31.3149	36.5887	42.3821	0
A_23_P126706	ref|NM_004673|ens|ENST00000367629|ens|ENST00000234816|gb|AK223467	hs|chr1:178820318-178820259	0	ANGPTL1	NM_004673	ref|Homo sapiens angiopoietin-like 1 (ANGPTL1), mRNA [NM_004673]	ANGPTL1	9068	-2.21811	0.214923	0.165126	0.987258	0	1023.48	219.969	3116.58	336.109	151.077	320.276	1
A_33_P3844650	ref|NM_012098|ens|ENST00000373417|ens|ENST00000373425|gb|BC012368	hs|chr9:129850994-129850935	0	ANGPTL2	NM_012098	ref|Homo sapiens angiopoietin-like 2 (ANGPTL2), mRNA [NM_012098]	ANGPTL2	23452	-0.576286	0.670688	0.437526	0.987258	0	9055.77	6073.6	8426.87	9731.6	10819.4	3409.48	1
A_23_P160262	ref|NM_014495|gb|BC007059|gb|AK315304|gb|AB590604	hs|chr1:63069669-63069728	0	ANGPTL3	NM_014495	ref|Homo sapiens angiopoietin-like 3 (ANGPTL3), mRNA [NM_014495]	ANGPTL3	27329	-0.139281	0.907972	0.568069	0.987258	0	37.7649	34.2895	38.4673	37.0753	33.9132	34.6699	0
A_33_P3295358	ref|NM_139314|ref|NM_001039667|ens|ENST00000301455|ens|ENST00000393962	hs|chr19:8439197-8439256	0	ANGPTL4	NM_139314	ref|Homo sapiens angiopoietin-like 4 (ANGPTL4), transcript variant 1, mRNA [NM_139314]	ANGPTL4	51129	-0.527247	0.693877	0.19827	0.987258	0	9591.78	6655.52	10130.2	9081.97	5293.27	8368.34	1
A_23_P64161	ref|NM_178127|ens|ENST00000334289|gb|AK291523|gb|AY169281	hs|chr11:101762163-101762104	0	ANGPTL5	NM_178127	ref|Homo sapiens angiopoietin-like 5 (ANGPTL5), mRNA [NM_178127]	ANGPTL5	253935	0.281539	1.21549	0.293299	0.987258	0	41.0445	49.8892	43.2698	38.9336	48.8044	50.9981	0
A_23_P50276	ref|NM_031917|ens|ENST00000253109|gb|CR591845|gb|CR617920	hs|chr19:10203315-10203256	0	ANGPTL6	NM_031917	ref|Homo sapiens angiopoietin-like 6 (ANGPTL6), mRNA [NM_031917]	ANGPTL6	83854	-0.624472	0.648657	0.147858	0.987258	0	116.055	75.2797	91.5605	147.102	78.8848	71.8394	1
A_23_P114862	ref|NM_021146|ens|ENST00000376819|gb|AY358301|gb|Y16132	hs|chr1:11255859-11255918	0	ANGPTL7	NM_021146	ref|Homo sapiens angiopoietin-like 7 (ANGPTL7), mRNA [NM_021146]	ANGPTL7	10218	0.152925	1.11182	0.55717	0.987258	0	32.8968	36.5754	34.0202	31.8106	39.3145	34.0272	0
A_23_P114862	ref|NM_021146|ens|ENST00000376819|gb|AY358301|gb|Y16132	hs|chr1:11255859-11255918	0	ANGPTL7	NM_021146	ref|Homo sapiens angiopoietin-like 7 (ANGPTL7), mRNA [NM_021146]	ANGPTL7	10218	0.0999378	1.07173	0.677414	0.987258	0	33.8005	36.2249	33.9456	33.6559	35.7937	36.6613	0
A_23_P114862	ref|NM_021146|ens|ENST00000376819|gb|AY358301|gb|Y16132	hs|chr1:11255859-11255918	0	ANGPTL7	NM_021146	ref|Homo sapiens angiopoietin-like 7 (ANGPTL7), mRNA [NM_021146]	ANGPTL7	10218	-0.00717879	0.995036	0.977513	0.999104	0	32.4183	32.2573	31.3361	33.5378	34.7627	29.9325	0
A_23_P114862	ref|NM_021146|ens|ENST00000376819|gb|AY358301|gb|Y16132	hs|chr1:11255859-11255918	0	ANGPTL7	NM_021146	ref|Homo sapiens angiopoietin-like 7 (ANGPTL7), mRNA [NM_021146]	ANGPTL7	10218	-0.0213576	0.985305	0.931278	0.99697	0	35.5664	35.0437	33.4886	37.773	35.7484	34.3529	0
A_23_P114862	ref|NM_021146|ens|ENST00000376819|gb|AY358301|gb|Y16132	hs|chr1:11255859-11255918	0	ANGPTL7	NM_021146	ref|Homo sapiens angiopoietin-like 7 (ANGPTL7), mRNA [NM_021146]	ANGPTL7	10218	-0.0519635	0.964623	0.840438	0.992672	0	35.5311	34.2741	35.9036	35.1624	37.4088	31.402	0
[truncated: 41,867 more rows]

## Sheet: p<0.01 Gene List, low to high
ProbeName	accessions	chr_coord	ControlType	GeneName	SystematicName	Description	GeneSymbol	Entrez	PancreasTumor.vs.PancreasNormal (LogFC)	LinearRatio	PancreasTumor.vs.PancreasNormal .pvalue	PancreasTumor.vs.PancreasNormal .fdr	Up/Down	AvgExp.PancreasNormal	AvgExp.PancreasTumor	P7.ni	P9.n	P7.ti	P9.t	NoLowFilter
[truncated: 145 more rows]

[truncated: 3 more sheets: GSEA Pos-Neg List (FDR < 0.25), GSEA Positive Enrichment List, GSEA Negative Enrichment List]
