# Supplementary material for: Netrin G1 Promotes Pancreatic Tumorigenesis through Cancer-Associated Fibroblast–Driven Nutritional Support and Immunosuppression
Source: Oxford University Press journal article supplement (doi:10.1158/2159-8290.cd-20-0775), 2020-10-30
Supplement: 21598290cd200775-sup-244433_2_supp_6663101_qrrntb.xlsx [file 21598290cd200775-sup-244433_2_supp_6663101_qrrntb.xlsx]

## Sheet: FCCC TMA
FCCC TMA	Clinical Data Table
PDAC cases
Specimens	Number
Primary tumor	77
Secondary tumor	3
Gender	%
Female	39
Male	41
Average Age (years)	Range (years)
62.11	32-87
TNM staging (clinical)
T	cases (%)
1	7.5
2	25
3	22.5
4	11.25
na*	33.75
N	cases (%)
0	51.25
1	8.75
2	0
na*	40
M	cases (%)
0	65
1	7.5
na*	27.5
Pathological staging
Stage	cases (%)
0	1.25
I (A/B)	8.75
II (A/B)	51.25
III	6.25
IV	10
na*	22.5
*None available

## Sheet: MDA TMA
MDA TMA	Clinical Data Table
PDAC cases
Specimens	Number
Primary tumor	143
Secondary tumor	0
Gender	%
Female	44.0559
Male	55.9441
Average Age (years)	Range (years)
TNM staging (clinical)
T	cases (%)
1	13.986
2	70.6294
3	15.3846
4	0
N	cases (%)
0	23.7762
1	32.1678
2	44.0559
M	cases (%)
0	97.9
1	2.1
Pathological staging
Stage	cases (%)
0	0
I (A/B)	0.699301
II (A/B)	96.5035
III	0.699301
IV	2.0979
